# Supplementary material for: Identification of Melanoma Subsets Based on DNA Methylation Sites and Construction of a Prognosis Evaluation Model
Source: J Oncol. 2022 Oct 11;2022:6608650. doi: 10.1155/2022/6608650 (PMC9578801; doi:10.1155/2022/6608650)
Supplement: Supplementary Materials — Supplementary Table 1. Prognosis-related methylation sites by univariate Cox regression analysis (783 sites were found, P < 0.0001). Supplementary Table 2. Multivariate Cox regression analysis of the 783 methylation sites (256 sites were found, P < 0.0001). Supplementary Table 3. Level of the 256 sites in 338 samples and the follow-up. Supplementary Table 4. Analysis of differences in methylation site levels between the 7 clusters. Supplementary Table 5. Risk assessment. Supplementary Table 6. Testing the prediction model in 60% of the samples (randomly) for 100 times. Supplementary Table 7. Functional enrichment analysis of genes and 28 pathways were observed. Supplementary Table 8. The correlation coefficients between the expression levels of the 35 hub genes (∗∗P < 0.01, ∗P < 0.05). Supplementary Table 9. The correlation coefficients of the critical genes validated in the testing group (∗∗P < 0.01). Figure S1. The clinical features in different DNA methylation subgroups. The clinical T categories (a), N stage (b), and M status (c) of different subtypes. The tumor stage (d), patient ages (e), and gender (f) in different subtypes. C, cluster; T, primary tumor; N, lymph node involvement; M, distant metastases. [file 6608650.f1.zip › Supplementary Table 3. Level of the 256 sites in 338 samples and the follow-up.txt]

Supplementary Table 3. Level of the 256 sites in 338 samples and the follow-up.
ID	survival time	survival state	cg00089550	cg00119073	cg00244517	cg00394658	cg00491548	cg00533183	cg00549475	cg00622799	cg00637477	cg00666746	cg00730561	cg00754357	cg00835193	cg00851518	cg00933835	cg01024247	cg01220257	cg01328833	cg01341487	cg01613691	cg01768328	cg02025583	cg02055253	cg02160608	cg02285386	cg02290550	cg02335376	cg02374486	cg02576938	cg02608453	cg02717339	cg02736280	cg02737321	cg02774856	cg02851047	cg02865595	cg03000846	cg03154077	cg03241502	cg03331514	cg03339910	cg03520342	cg03750567	cg03835987	cg03880841	cg03950476	cg04020309
TCGA-3N-A9WD	395	1	0.357839625	0.200834864	0.424050632	0.376028336	0.364482374	0.569112698	0.150773005	0.266506976	0.220789703	0.282079567	0.401502228	0.462704734	0.366299951	0.404800216	0.396053447	0.476580034	0.382255424	0.337719143	0.340825595	0.347968081	0.546270643	0.376358937	0.516072088	0.393705572	0.654552129	0.453398214	0.465905148	0.632322003	0.599682336	0.734563695	0.476698334	0.577634537	0.883863004	0.078180538	0.558977901	0.358030089	0.434993315	0.667100344	0.988232442	0.489245905	0.288732752	0.482641689	0.387407156	0.316652372	0.166534425	0.49738616	0.220734557
TCGA-BF-A1PU	387	0	0.121021638	0.103173485	0.244816986	0.078791241	0.197669739	0.90646825	0.07872173	0.042573383	0.744928517	0.0989576	0.187732193	0.135917926	0.395747027	0.113664337	0.236464234	0.156002466	0.295982902	0.146022671	0.123681576	0.387770839	0.268028981	0.109819921	0.245892211	0.097232351	0.201544341	0.272368115	0.164167893	0.839213919	0.297646145	0.635446794	0.108374127	0.191508284	0.949974771	0.040171682	0.650831092	0.175070988	0.261534563	0.78173215	0.989534101	0.135740365	0.063388285	0.811625678	0.071125598	0.043300901	0.074584832	0.208978832	0.316719875
TCGA-BF-A1PX	282	1	0.484422769	0.390712204	0.722167001	0.440710209	0.595075713	0.489597905	0.296375906	0.343273958	0.535164591	0.416791318	0.617523852	0.632441022	0.635037739	0.547148861	0.566724786	0.583770023	0.614057826	0.524711039	0.517235269	0.475200769	0.585961341	0.381229754	0.522033406	0.422464326	0.761816826	0.665780179	0.585872312	0.4840912	0.678177476	0.960963603	0.555975241	0.660042123	0.918104992	0.098687887	0.80823249	0.635483791	0.580720491	0.576182437	0.987384767	0.552077587	0.329356734	0.401287064	0.543685733	0.486054753	0.23390976	0.564046944	0.434868505
TCGA-BF-A1PZ	853	0	0.219993564	0.112227857	0.224179616	0.153198111	0.207339683	0.39184162	0.112081396	0.088605544	0.105894651	0.251044164	0.127774123	0.139805754	0.256880895	0.369118949	0.260912852	0.280991696	0.17813114	0.201130246	0.219558372	0.224621613	0.292892915	0.158331498	0.382703532	0.320166005	0.189241714	0.262557316	0.263495779	0.711504804	0.234201618	0.686165635	0.298501236	0.271897851	0.89738467	0.0549977	0.755159397	0.161927084	0.322156528	0.547095852	0.985198951	0.315131294	0.116747484	0.752403956	0.336318895	0.196066584	0.112734949	0.235505151	0.213920747
TCGA-BF-A1Q0	831	0	0.32571839	0.28450711	0.769715918	0.303163278	0.330431785	0.724445965	0.187130561	0.178169276	0.439495204	0.25533558	0.621642329	0.312061217	0.564458082	0.40090532	0.404083887	0.442412712	0.517333318	0.367459139	0.391533008	0.411387673	0.425574345	0.313539104	0.636761161	0.380895146	0.716820379	0.665029931	0.357910011	0.591961963	0.757171165	0.927121546	0.776367732	0.542766855	0.933280872	0.091003288	0.777684909	0.327066264	0.469092056	0.505764435	0.982431511	0.434989535	0.20772512	0.157116643	0.413776248	0.376174863	0.191674213	0.554691327	0.712771055
TCGA-BF-A3DJ	464	0	0.335872814	0.152199294	0.440837564	0.168506481	0.337835633	0.708016851	0.079564604	0.14460478	0.192705095	0.301061352	0.235341415	0.169378463	0.437072455	0.333171899	0.312269401	0.467996976	0.311115544	0.304319481	0.325476957	0.277491249	0.407665745	0.148569993	0.372883432	0.317965936	0.415501539	0.751749127	0.582333429	0.663418998	0.455676984	0.548336193	0.279398841	0.41078398	0.83188564	0.065077641	0.815849954	0.25624266	0.32146482	0.688973689	0.982421681	0.387381443	0.145621023	0.085161197	0.347599934	0.126591616	0.123532394	0.284499709	0.158739
TCGA-BF-A3DL	769	0	0.355674648	0.182510773	0.429747246	0.148595396	0.336315002	0.874621092	0.070215873	0.061714994	0.063365719	0.146935414	0.167227856	0.139926729	0.438664	0.400830893	0.411707186	0.374946064	0.352698173	0.353193753	0.296730373	0.266776034	0.463772461	0.145494506	0.348156933	0.308140146	0.421591499	0.534129682	0.3792852	0.830318706	0.379338722	0.79471275	0.287561945	0.520908232	0.888431464	0.036510789	0.51485765	0.324583029	0.24463663	0.696079138	0.987677405	0.409866579	0.061668135	0.598421666	0.400980635	0.039438707	0.103622726	0.426689483	0.095269315
TCGA-BF-A3DM	601	0	0.187386392	0.07110198	0.322419236	0.120954284	0.245448087	0.370727767	0.04006108	0.106311977	0.057945112	0.101986211	0.125444195	0.132528458	0.202763858	0.192524427	0.166734765	0.195545828	0.326195255	0.183544045	0.162646333	0.180263666	0.450913668	0.066737424	0.578905657	0.044575803	0.244896795	0.387675872	0.292695124	0.812965017	0.7421889	0.937696227	0.239812667	0.270577597	0.771688434	0.030149406	0.700474495	0.549709471	0.313163964	0.605080365	0.98308633	0.197765215	0.089937334	0.086639513	0.151872766	0.033669012	0.063820807	0.180696994	0.043526245
TCGA-BF-A3DN	717	0	0.436929463	0.143085446	0.326518425	0.267947376	0.286126487	0.775826663	0.111592253	0.183788084	0.133253491	0.206815028	0.276645671	0.349429725	0.441793629	0.245349912	0.30627846	0.39969895	0.559183562	0.245417759	0.250501264	0.225476403	0.549950433	0.135532128	0.398409345	0.183073773	0.212971264	0.61915368	0.381407798	0.7699293	0.57365376	0.296151077	0.298942189	0.574158462	0.904923414	0.065566259	0.712476917	0.332506134	0.372558221	0.734877244	0.985369466	0.250834549	0.234833445	0.676655628	0.209408636	0.094110232	0.121580116	0.376904268	0.242072518
TCGA-BF-A5EO	703	0	0.426706153	0.256273177	0.476464457	0.282132449	0.508509012	0.683014493	0.132315963	0.244088705	0.205339205	0.348906561	0.516677612	0.243020226	0.751705835	0.478061043	0.453288405	0.49034603	0.414614505	0.521336321	0.426966517	0.451481391	0.625360121	0.242299538	0.43090632	0.443156028	0.543679077	0.397178982	0.507388323	0.511372856	0.448199671	0.486811054	0.482265237	0.669047809	0.936201369	0.074330782	0.764091337	0.356190402	0.43062459	0.642290041	0.987769007	0.510933609	0.188424201	0.592796999	0.507517497	0.233874344	0.171125581	0.357551155	0.265357197
TCGA-BF-A5EP	335	0	0.236024602	0.197759597	0.795466267	0.677187838	0.292516007	0.893738106	0.315960419	0.203142905	0.309522922	0.347269348	0.388818105	0.13637154	0.348145204	0.296148254	0.466017312	0.547276629	0.2534582	0.309058982	0.311626408	0.381420807	0.494271165	0.405712722	0.378059252	0.221265551	0.4803639	0.297093702	0.366221829	0.730197904	0.430085876	0.31745613	0.227404997	0.452155925	0.94529185	0.060271226	0.710762031	0.201238722	0.418750111	0.712221015	0.990127629	0.35212495	0.211456338	0.699346618	0.370420473	0.334275326	0.079621816	0.249655933	0.178538495
TCGA-BF-A5EQ	323	0	0.455058508	0.402193621	0.809125299	0.619260152	0.377152315	0.825762601	0.318259896	0.178285017	0.582438416	0.648197125	0.71627498	0.570385697	0.593622573	0.477151801	0.378558102	0.569773573	0.524863492	0.385555705	0.516248356	0.475477333	0.522819639	0.442089639	0.590184832	0.399360574	0.895132319	0.664189879	0.727731074	0.668342132	0.534573792	0.864963207	0.529410426	0.494450188	0.956923246	0.227260676	0.771442545	0.332672858	0.474347018	0.704624511	0.990163375	0.479656472	0.185390508	0.683424812	0.655504179	0.733832391	0.196501522	0.618605046	0.751474438
TCGA-BF-A5ER	327	0	0.197086009	0.285000396	0.820317452	0.66790748	0.289479462	0.865230316	0.078181628	0.653782757	0.693933899	0.692009545	0.714767625	0.19491662	0.737889623	0.24831899	0.801930467	0.796794847	0.832339128	0.760643677	0.781990498	0.24856929	0.725942469	0.065393251	0.676990827	0.148037738	0.897458952	0.746302009	0.703183664	0.79011502	0.695871018	0.920533911	0.690100449	0.41089399	0.902060563	0.036635902	0.838460541	0.765123727	0.273473201	0.714421175	0.98894842	0.881524589	0.769454124	0.726563274	0.358155984	0.618428015	0.082065774	0.528518996	0.360992768
TCGA-BF-A5ES	490	0	0.302209317	0.467361818	0.571386327	0.610706287	0.346459141	0.809905899	0.695444572	0.12711695	0.456537397	0.27270263	0.33555353	0.617174341	0.573559733	0.46945307	0.677819529	0.590877624	0.627345535	0.767641741	0.55879117	0.303341952	0.467923827	0.539144575	0.74703332	0.362853188	0.759101595	0.454531485	0.557026896	0.716364513	0.622715367	0.907281198	0.438990329	0.52343008	0.945628753	0.112462878	0.736873663	0.352499919	0.459259485	0.562424261	0.988051341	0.449428081	0.129071243	0.655308877	0.495734926	0.449645972	0.179600293	0.677605026	0.733227357
TCGA-BF-A9VF	440	0	0.160633382	0.097575254	0.126863196	0.246087676	0.144082469	0.761858372	0.857934072	0.052044548	0.086907429	0.449374782	0.134170078	0.903448619	0.474815354	0.11038494	0.152588239	0.605700852	0.13854033	0.142934506	0.351942852	0.116838236	0.162571228	0.729244343	0.323877615	0.076317449	0.092070082	0.157294269	0.709607757	0.702404626	0.499595453	0.161977849	0.113472383	0.147578366	0.934835937	0.029123586	0.787690362	0.10283513	0.4286911	0.805839507	0.989354291	0.123395711	0.086306772	0.846261361	0.163366931	0.455819153	0.075963936	0.869186007	0.529553775
TCGA-BF-AAOU	476	0	0.26842054	0.207245319	0.818519656	0.4632258	0.34699129	0.682867344	0.715396921	0.137383721	0.40752984	0.301943677	0.313682514	0.57267662	0.360739533	0.506413654	0.536300577	0.467280991	0.381423434	0.363959518	0.364033948	0.546934801	0.787451496	0.523315897	0.736211404	0.353724685	0.687440923	0.495695687	0.390548733	0.674752598	0.683758056	0.908864587	0.416137598	0.70486096	0.920530331	0.098013792	0.754584525	0.445504359	0.703833974	0.634768084	0.986361205	0.481385958	0.152518449	0.496260405	0.580986455	0.28634718	0.17751877	0.676611352	0.615064795
TCGA-BF-AAOX	444	0	0.240360969	0.379636513	0.356568693	0.12632824	0.357608363	0.795779511	0.06882868	0.144793752	0.172486614	0.315029126	0.18247658	0.147652433	0.326469596	0.254461484	0.319399622	0.319654339	0.751675128	0.27801014	0.237806434	0.283477991	0.471952949	0.153743936	0.317971925	0.312952007	0.363318098	0.283704612	0.308640308	0.268260905	0.312757711	0.374934977	0.336409581	0.552789318	0.936624012	0.043924423	0.316628623	0.296403866	0.288546966	0.632057727	0.988604185	0.453413842	0.14579784	0.422556454	0.31441025	0.143185948	0.147210095	0.228215054	0.1318034
TCGA-BF-AAP1	409	0	0.137697256	0.056660851	0.290471438	0.592208177	0.47133367	0.731851453	0.677276128	0.07112797	0.054822851	0.201959008	0.772229262	0.412656812	0.328828718	0.28638825	0.157675454	0.700000086	0.244370034	0.145145637	0.131148327	0.326528215	0.860174571	0.434470115	0.399582429	0.248998559	0.415367235	0.425582974	0.542029811	0.786922193	0.884298675	0.887334508	0.255965355	0.900860075	0.858749853	0.108953695	0.772826395	0.396285707	0.728480706	0.699910379	0.984749884	0.224525329	0.064399611	0.750414239	0.275018302	0.103790883	0.084759752	0.480456776	0.106357362
TCGA-BF-AAP2	405	0	0.208509469	0.117568677	0.298069037	0.261327796	0.222158194	0.337515791	0.076979072	0.153719281	0.160797022	0.187182567	0.2824534	0.150362939	0.452707035	0.325358624	0.174773702	0.335200243	0.269244776	0.257450405	0.226243461	0.258750727	0.320120613	0.14845168	0.412417882	0.261012487	0.246490571	0.417966281	0.442244482	0.609652547	0.528013213	0.236030712	0.448460082	0.366404069	0.872638633	0.045073771	0.700542734	0.206815604	0.399745954	0.634806862	0.989369872	0.299002529	0.166188947	0.659914986	0.296638537	0.19774056	0.14753529	0.252835944	0.172664174
TCGA-BF-AAP4	335	0	0.403257466	0.367735413	0.447352537	0.390928971	0.382219828	0.613836044	0.455600095	0.236994434	0.45159888	0.34010724	0.435954626	0.703432878	0.359634424	0.458214585	0.329419429	0.398437558	0.397407064	0.407988254	0.338635453	0.409165109	0.432276105	0.53293867	0.658280133	0.419227747	0.50299311	0.502416675	0.387498065	0.473389123	0.566456552	0.584371764	0.425853087	0.568522686	0.918520287	0.096194995	0.543772443	0.343998781	0.697486274	0.545684323	0.98791894	0.473648938	0.217999697	0.51033206	0.515099232	0.362771681	0.159054038	0.644915707	0.279498648
TCGA-BF-AAP6	325	0	0.145970299	0.21235742	0.21630556	0.135932061	0.181197528	0.909590888	0.097668519	0.058112044	0.088917505	0.178657608	0.181222322	0.138675351	0.247269871	0.189075078	0.180855141	0.248884265	0.806905073	0.152414937	0.187134811	0.228416748	0.525302921	0.118873322	0.211874117	0.204601626	0.247535739	0.524035207	0.398292421	0.396774461	0.391605653	0.698967278	0.198864877	0.473986584	0.893661773	0.038170104	0.757515334	0.199927509	0.270886685	0.774500661	0.987668464	0.305264034	0.085594	0.145349021	0.236406066	0.150902972	0.07401877	0.220464443	0.133022265
TCGA-BF-AAP7	318	0	0.339983759	0.384839962	0.599499634	0.384500865	0.422055732	0.348601745	0.339024961	0.314900264	0.395183486	0.341572351	0.515372313	0.670729335	0.386980528	0.502171361	0.518594909	0.512270573	0.440438702	0.455822938	0.390626319	0.387914212	0.53349046	0.319576292	0.468539534	0.424335508	0.716467335	0.508113618	0.562650504	0.435959021	0.660903203	0.794256701	0.488453192	0.590814691	0.911393309	0.088493242	0.784427428	0.47273601	0.564606888	0.555489256	0.986146541	0.597591059	0.290604448	0.419068791	0.476482931	0.454781807	0.182734164	0.579447408	0.382792383
TCGA-BF-AAP8	447	0	0.129465355	0.316763055	0.708398905	0.090024025	0.327935895	0.763968756	0.69380719	0.114903003	0.127005737	0.256043443	0.19377695	0.72108671	0.205317332	0.382169687	0.155316716	0.369292962	0.207754599	0.291789195	0.237794178	0.503277675	0.503160441	0.594246266	0.69075023	0.101755511	0.539907638	0.343974647	0.292112645	0.678738253	0.886681203	0.848238064	0.604107688	0.380700905	0.826939817	0.029779766	0.735998188	0.284637883	0.373774739	0.64830378	0.989843167	0.204616498	0.119553242	0.709471753	0.217435965	0.175432416	0.188010212	0.507656838	0.198437067
TCGA-D3-A1Q1	504	1	0.119303309	0.0730448	0.21217855	0.10870862	0.209418448	0.865833212	0.09528476	0.128016398	0.05608353	0.194428003	0.078278159	0.115901829	0.179809666	0.177493172	0.1081779	0.220191909	0.103652968	0.126340808	0.128603358	0.230333695	0.229660596	0.133372397	0.184568575	0.034634905	0.100620804	0.35178983	0.508202237	0.818019121	0.795910165	0.147597059	0.103963182	0.159904281	0.943922173	0.017538415	0.266054765	0.292356581	0.274160191	0.785783299	0.991116387	0.151614896	0.127627863	0.849539014	0.142264771	0.038545493	0.049744519	0.143858751	0.147215554
TCGA-D3-A1Q3	507	1	0.542720147	0.316453626	0.485942995	0.594693949	0.424047464	0.439677985	0.598410328	0.266974422	0.644548105	0.469017237	0.744683723	0.709945777	0.795452145	0.433349409	0.799575396	0.776439331	0.75936285	0.713800201	0.626101525	0.477560186	0.800453535	0.656253649	0.765605295	0.35177894	0.905261558	0.81227494	0.659595826	0.653537768	0.801873864	0.951441014	0.828108762	0.845802302	0.937321404	0.137279926	0.783755166	0.334529432	0.688500995	0.586741614	0.991170342	0.448647412	0.297792045	0.666631063	0.420456718	0.65280663	0.13942434	0.707784026	0.733303782
TCGA-D3-A1Q4	3408	0	0.297993626	0.216655938	0.412703432	0.265998469	0.320444422	0.755385961	0.146887748	0.395417532	0.197352275	0.2071164	0.262342743	0.578395434	0.323304579	0.419421077	0.573847068	0.5014575	0.29134226	0.310519557	0.310899906	0.29704817	0.684440105	0.154749545	0.609500286	0.295767573	0.670863249	0.532215369	0.425255332	0.737243369	0.86733208	0.90174622	0.362557618	0.618496254	0.95336893	0.047390005	0.669554694	0.468986704	0.482345283	0.716609335	0.987160876	0.346197371	0.322049763	0.529359688	0.372142177	0.210583458	0.156293462	0.465114853	0.205184944
TCGA-D3-A1Q6	2184	1	0.51957952	0.283856104	0.473296926	0.397011914	0.383197795	0.524370983	0.464462787	0.16913476	0.18093112	0.383484318	0.455397538	0.565480883	0.544533562	0.610400876	0.515557379	0.479761309	0.430675522	0.400916789	0.481900666	0.408827927	0.787975498	0.4278343	0.537984135	0.395673634	0.761498992	0.742674235	0.485820297	0.690210131	0.864573488	0.943430423	0.544012818	0.847205193	0.921706149	0.089557308	0.83077631	0.68257429	0.520887969	0.692053357	0.98698715	0.45565401	0.193827777	0.098613064	0.479168827	0.276573388	0.156138123	0.588131834	0.18957408
TCGA-D3-A1Q7	4053	0	0.457137095	0.318183265	0.590852795	0.542300157	0.505061307	0.521762147	0.319515218	0.332639339	0.565620895	0.412261912	0.623243844	0.702027196	0.630807002	0.593938011	0.536924359	0.55238431	0.481139392	0.542087948	0.434984936	0.524911673	0.618399764	0.380644975	0.553186618	0.434922218	0.752701036	0.672799245	0.546139788	0.505742654	0.712521062	0.94369821	0.550726492	0.61843333	0.943682878	0.098010127	0.703006422	0.534119989	0.634638793	0.521506921	0.988628673	0.576540695	0.300504068	0.565747249	0.614796143	0.507637712	0.208799355	0.617011386	0.404290612
TCGA-D3-A1Q8	854	1	0.340633407	0.303548153	0.571532593	0.493906256	0.40651651	0.772185164	0.413342579	0.152010474	0.175586379	0.300915544	0.586537868	0.328906579	0.69579756	0.509688265	0.443885941	0.465706017	0.69838528	0.392001517	0.428485504	0.570427254	0.541751015	0.398205628	0.430287032	0.317857874	0.756078385	0.604567839	0.569565667	0.721328135	0.889763295	0.749414076	0.431593373	0.542789564	0.944214196	0.069004227	0.751817751	0.461624295	0.610606297	0.760378831	0.991383647	0.489927399	0.129361406	0.482540201	0.455127739	0.273143388	0.163832486	0.370631767	0.231980986
TCGA-D3-A1Q9	961	1	0.398578991	0.266646221	0.328991674	0.235633154	0.370330398	0.733642145	0.415116026	0.19207773	0.559793509	0.393961148	0.368658245	0.308116711	0.366831223	0.404620388	0.29614434	0.259078608	0.4099356	0.364922377	0.263097896	0.363569686	0.444734202	0.660520604	0.361375733	0.371730304	0.771952205	0.386464186	0.382642103	0.666869803	0.630563609	0.259252418	0.335222334	0.413103965	0.943164997	0.068484437	0.847403112	0.328199808	0.367661514	0.599386116	0.974044404	0.401982009	0.207535324	0.486982331	0.381009339	0.32908257	0.175809489	0.498506884	0.681996119
TCGA-D3-A1QA	2765	0	0.217606802	0.814701241	0.901698434	0.799923794	0.20419033	0.843803876	0.137983808	0.526935567	0.89257645	0.312354743	0.897402025	0.11156411	0.865456143	0.254184266	0.212734526	0.659036247	0.842350361	0.168758222	0.210519689	0.39893655	0.352732531	0.165358283	0.674005153	0.281944068	0.860392173	0.853496621	0.514182888	0.182274321	0.524151037	0.830081387	0.908795317	0.329659731	0.940118337	0.066508173	0.854686198	0.831603008	0.481389626	0.784954743	0.988458927	0.27471325	0.620849636	0.586361226	0.36938243	0.431853934	0.10651899	0.289974145	0.146927103
TCGA-D3-A1QB	2912	0	0.465844204	0.341033871	0.612015214	0.439919971	0.615429729	0.572328883	0.306116057	0.368223061	0.452020958	0.535186111	0.521163252	0.568670722	0.620569714	0.607841428	0.512028163	0.626805572	0.499606615	0.686071032	0.498100376	0.521144133	0.574073099	0.41412876	0.522566749	0.467070085	0.60670614	0.570872394	0.658174042	0.544430117	0.596969241	0.853963734	0.533274073	0.634537628	0.906565328	0.109525991	0.846257679	0.516390028	0.55333965	0.581173675	0.98913971	0.570934515	0.348881619	0.539914052	0.511190716	0.547078133	0.195018494	0.537130691	0.397778329
TCGA-D3-A2J6	1321	1	0.400654165	0.170475635	0.384364067	0.320423836	0.317401449	0.484022849	0.174861567	0.18823776	0.240530708	0.299763112	0.401496478	0.342708888	0.775075312	0.417760308	0.429798865	0.239122836	0.308144019	0.317366237	0.331632859	0.357983859	0.442158465	0.278132225	0.403437064	0.369243328	0.363184314	0.472527767	0.377894508	0.636907766	0.387090084	0.760460957	0.616481393	0.516257772	0.802098964	0.078321355	0.671372761	0.27574482	0.400664008	0.640927867	0.988023067	0.421516679	0.246452502	0.12581736	0.381097957	0.406896211	0.185281195	0.474518449	0.247490865
TCGA-D3-A2J7	3136	1	0.470212718	0.345997975	0.635493761	0.451253797	0.47242137	0.52764103	0.287814153	0.313907034	0.702779785	0.48053525	0.683002357	0.68966951	0.591942889	0.533594303	0.530253898	0.729559665	0.431747774	0.451090755	0.391381488	0.584767299	0.825655559	0.350478815	0.715737941	0.447385293	0.643240935	0.635708762	0.502543286	0.548220827	0.557511708	0.945325968	0.489459993	0.88629755	0.940276196	0.123459916	0.88484963	0.518893842	0.614795636	0.636442611	0.988424006	0.522785246	0.295654774	0.501036368	0.484988968	0.485498988	0.249644002	0.57750142	0.698283351
TCGA-D3-A2J8	1992	1	0.407483572	0.409080775	0.672566242	0.341676845	0.643186797	0.425084794	0.217442042	0.292187972	0.361551334	0.357701767	0.445626624	0.585222234	0.590512951	0.567530916	0.626998143	0.550661715	0.504654914	0.574882714	0.429071438	0.45710726	0.731974454	0.30535963	0.563351925	0.455827302	0.834752565	0.585905001	0.566911254	0.497868017	0.813625053	0.884671841	0.670722479	0.756004517	0.940341018	0.092145056	0.8335867	0.649247857	0.521880773	0.610736622	0.987461599	0.577710872	0.257957359	0.456452027	0.619696891	0.436067127	0.210830194	0.524754335	0.330288148
TCGA-D3-A2J9	723	1	0.539592019	0.38499151	0.705771009	0.484035673	0.567481383	0.45189217	0.319545566	0.291067315	0.404014596	0.480841605	0.587717693	0.696893764	0.538846147	0.675568956	0.557292217	0.529888339	0.580996476	0.617197122	0.516085188	0.515552634	0.692659957	0.41260769	0.558284839	0.506944427	0.70394404	0.600128579	0.634267811	0.323581023	0.789944383	0.82768322	0.653350142	0.723966625	0.918864591	0.118733007	0.836348503	0.602671684	0.540738543	0.646096198	0.991411672	0.616837581	0.264938387	0.505778574	0.622133373	0.596388098	0.250961321	0.615039348	0.49368574
TCGA-D3-A2JA	3514	0	0.3628017	0.190240237	0.435691474	0.337351884	0.361322785	0.751274317	0.404167481	0.224999565	0.182885162	0.221643264	0.379925618	0.212614961	0.362038151	0.504513804	0.44084278	0.557667628	0.465059422	0.349346529	0.310594609	0.306507598	0.7881573	0.438899159	0.600361455	0.343527683	0.740687067	0.443655496	0.635236554	0.406675942	0.84640416	0.952479115	0.348856656	0.832784857	0.954555455	0.052375154	0.833328779	0.421586014	0.60048986	0.725932495	0.989748119	0.389223153	0.180382563	0.595975982	0.444306886	0.257424789	0.159357079	0.338044348	0.243704355
TCGA-D3-A2JC	2639	0	0.372115932	0.282679462	0.470410474	0.407648627	0.357600966	0.24062609	0.218559172	0.214958724	0.276079831	0.468421405	0.452112652	0.818529062	0.391832408	0.525661207	0.63942229	0.660362001	0.325713691	0.441693409	0.294667155	0.3098442	0.418549246	0.280623404	0.510354884	0.465005981	0.588893909	0.718167307	0.398789793	0.508007704	0.818912628	0.872702136	0.62679579	0.528221126	0.931851748	0.085674588	0.823577832	0.38973699	0.449021619	0.5346913	0.991069147	0.457161657	0.203123329	0.057427612	0.481589362	0.404091128	0.221561398	0.762106464	0.306034996
TCGA-D3-A2JD	361	1	0.384086605	0.336689953	0.555267558	0.4515648	0.48373786	0.695046433	0.282605274	0.209958333	0.313655068	0.333847907	0.388270093	0.3852483	0.594003014	0.464147308	0.421516653	0.368045852	0.603663408	0.55059424	0.401308164	0.470527328	0.558061026	0.439018245	0.705027884	0.361605879	0.553652607	0.408108453	0.527741834	0.549560729	0.450428628	0.750959244	0.40981947	0.622644421	0.9516567	0.082846582	0.676565124	0.470842128	0.390502839	0.678775216	0.979548261	0.419052152	0.173471303	0.51471459	0.38652402	0.347768189	0.209434344	0.421486789	0.286626717
TCGA-D3-A2JF	1888	0	0.375110065	0.186836639	0.445588226	0.384781842	0.31467379	0.197883886	0.18835558	0.238916314	0.278629508	0.365992212	0.517913583	0.710327784	0.86189477	0.516868245	0.39776468	0.421683412	0.376608617	0.328181305	0.440312397	0.329153593	0.714041498	0.260299136	0.691464869	0.39247109	0.921906903	0.792597936	0.590657332	0.649689276	0.844692885	0.944257784	0.40397407	0.756085532	0.940153706	0.060442245	0.773667263	0.363898354	0.495329447	0.471082029	0.991389418	0.456314773	0.195301198	0.067026091	0.4108901	0.344478779	0.18576821	0.62051536	0.681195152
TCGA-D3-A2JG	3453	1	0.264421322	0.298356714	0.744806946	0.699686042	0.267688634	0.763192539	0.607297561	0.427327869	0.287621898	0.51114082	0.681161642	0.706531699	0.646527859	0.433393436	0.276360019	0.458140868	0.654304929	0.284804804	0.273368506	0.331949713	0.406479943	0.662050676	0.475335975	0.265685784	0.352788997	0.54340998	0.363536678	0.735547054	0.672472068	0.486601495	0.412898962	0.450287721	0.938059718	0.110843779	0.672151485	0.239092043	0.78758563	0.724090871	0.988985698	0.380463596	0.495361518	0.761240806	0.371218767	0.271606808	0.148692916	0.588834741	0.14354851
TCGA-D3-A2JH	1280	0	0.49469081	0.427297693	0.658106425	0.448047503	0.53026766	0.331697405	0.380954069	0.340946901	0.438611802	0.501419419	0.649072287	0.687809303	0.589714881	0.52502792	0.53474229	0.362628278	0.552004486	0.594961513	0.536901913	0.503104485	0.663138195	0.420137553	0.515036916	0.473256089	0.726171764	0.528403768	0.651650274	0.393954434	0.729469979	0.957589974	0.549146315	0.648649788	0.952695687	0.075078312	0.7613658	0.516034682	0.626313804	0.536614829	0.983140618	0.594647276	0.322684298	0.358335845	0.467979986	0.553317723	0.198982758	0.592445065	0.54051006
TCGA-D3-A2JK	368	1	0.2925971	0.245823237	0.639422361	0.361219136	0.384342771	0.837644989	0.208962859	0.132454107	0.179954047	0.247396155	0.294288463	0.374816828	0.392680392	0.359445544	0.435147174	0.413495687	0.335417992	0.295952811	0.299350297	0.377552738	0.528198315	0.318237698	0.4188155	0.259718906	0.527145521	0.45797865	0.385446436	0.774169733	0.483353546	0.706780119	0.34371721	0.479267872	0.935000484	0.058062914	0.763982573	0.410450895	0.44685539	0.786627485	0.993575229	0.456568092	0.126275468	0.706941279	0.385251691	0.169330092	0.130308846	0.45676387	0.520475645
TCGA-D3-A2JN	2022	1	0.388948909	0.344619842	0.67174211	0.309004897	0.402587875	0.488491103	0.40231892	0.440237173	0.367154139	0.374943378	0.360888956	0.676681513	0.635694237	0.441853315	0.686177901	0.602296509	0.366339498	0.412069587	0.39344122	0.345295931	0.748701924	0.430721633	0.681031244	0.39523441	0.811443617	0.583519802	0.559206736	0.566729644	0.769540401	0.919306656	0.521824928	0.664970209	0.924370119	0.079124187	0.71767855	0.491171762	0.612783625	0.680319312	0.986171962	0.466739992	0.397371811	0.265577372	0.404858249	0.371758792	0.164594498	0.544164505	0.307441862
TCGA-D3-A2JP	1812	0	0.403905619	0.155723258	0.413993563	0.326217094	0.330216028	0.557578046	0.15715813	0.229139412	0.218764101	0.30455491	0.432134902	0.345562027	0.381243348	0.579035081	0.43201989	0.32916195	0.302278204	0.320340308	0.343663194	0.340531758	0.433453476	0.26870149	0.578534661	0.382069705	0.438289437	0.538765856	0.453088822	0.621315052	0.376934948	0.927671792	0.416521952	0.471926746	0.921100369	0.064356924	0.604787411	0.346639776	0.458954278	0.696090887	0.991005224	0.431605073	0.198232155	0.575531138	0.50748729	0.41106052	0.152819862	0.401346575	0.284127771
TCGA-D3-A3BZ	3976	0	0.45491626	0.352659468	0.605995164	0.337969244	0.535702973	0.65280737	0.246496348	0.264318169	0.413700507	0.42557812	0.479188321	0.522210621	0.605310634	0.48481696	0.618324122	0.56174238	0.468962569	0.532202629	0.491031775	0.519376371	0.6481296	0.320408407	0.654496347	0.415148821	0.715933097	0.560739267	0.642750243	0.538670927	0.755490557	0.909674814	0.488008043	0.670302544	0.915391699	0.08884972	0.798790607	0.566285509	0.630589505	0.618207772	0.979970122	0.498933217	0.230011625	0.435911931	0.462257968	0.409646953	0.229192873	0.528027242	0.557258978
TCGA-D3-A3C6	1766	1	0.150970076	0.12919219	0.199827539	0.119147075	0.277188655	0.833938391	0.139957263	0.15636477	0.151976898	0.135969236	0.171570252	0.320702601	0.231554952	0.273049295	0.324810187	0.382509865	0.262677441	0.163226474	0.149924795	0.378740122	0.846783208	0.178091056	0.334044788	0.208509493	0.30602425	0.355994983	0.292231198	0.797719719	0.826400554	0.216071223	0.228717614	0.903367522	0.86077539	0.029604843	0.800383437	0.325999321	0.469583659	0.769091519	0.990243242	0.255877763	0.142668956	0.29508502	0.223112492	0.042336875	0.088849333	0.352355689	0.081885912
TCGA-D3-A3C7	1429	0	0.319352687	0.164822106	0.712417839	0.476540056	0.283391047	0.77836893	0.488950815	0.135954353	0.165038422	0.233056519	0.746953131	0.278972753	0.474686496	0.429225287	0.533463691	0.558664898	0.237996825	0.276682935	0.254710141	0.257838379	0.355950162	0.414335694	0.354411188	0.355049249	0.908056422	0.393379012	0.612097734	0.603774808	0.859417307	0.92750097	0.363403693	0.401612911	0.919025719	0.049228426	0.796403902	0.396539065	0.812559851	0.739164847	0.990880135	0.373477574	0.150037853	0.45026596	0.348164781	0.358130986	0.140890186	0.448861367	0.184733139
TCGA-D3-A3CC	2644	0	0.373870907	0.193286311	0.403915067	0.418264813	0.306318451	0.83763513	0.366306012	0.348522497	0.217505021	0.317182559	0.245969816	0.250136025	0.709117036	0.312355363	0.270673901	0.272905394	0.73653975	0.289064668	0.274518207	0.567324805	0.811947984	0.331219301	0.624865473	0.268898643	0.29118661	0.411646899	0.455164595	0.744062648	0.604679463	0.841859233	0.729845121	0.832493961	0.909721645	0.054657228	0.709939763	0.402007938	0.748714862	0.775440368	0.989556431	0.348472987	0.3665812	0.706410955	0.287379496	0.160746455	0.236728015	0.435970014	0.670388679
TCGA-D3-A3CE	1832	1	0.283939958	0.231610383	0.61171986	0.321599406	0.379480337	0.404940881	0.265845325	0.211072135	0.329793311	0.351726194	0.350981073	0.395715932	0.377332906	0.484918892	0.380899517	0.51011116	0.294768458	0.357610871	0.333553882	0.335855571	0.443219236	0.263327202	0.709305439	0.32797082	0.693010595	0.41839792	0.355567157	0.665009305	0.85308096	0.957630019	0.430717494	0.415789955	0.922500372	0.053270671	0.521997931	0.531014042	0.437368727	0.675929041	0.972743089	0.495568731	0.196619597	0.423528621	0.4145568	0.283443346	0.168644913	0.448633023	0.219098269
TCGA-D3-A3CF	746	1	0.387156771	0.327491316	0.5892935	0.332859853	0.502070264	0.546078313	0.253348682	0.325160599	0.466628936	0.35588201	0.501296674	0.570898948	0.515581702	0.594518726	0.538259854	0.479732141	0.439344572	0.512549244	0.473258409	0.431811412	0.623898852	0.289241856	0.672421239	0.43538096	0.637845072	0.593921829	0.549814944	0.521665795	0.595555857	0.928794842	0.573409477	0.684018674	0.919970801	0.120411127	0.732034311	0.513943211	0.431225271	0.578859833	0.990565243	0.566419342	0.257138797	0.435758757	0.578268675	0.441565996	0.191704265	0.506884076	0.384640552
TCGA-D3-A3ML	422	1	0.103188041	0.06695098	0.583206523	0.370498241	0.147012427	0.750909532	0.109674283	0.103797436	0.252036034	0.110683398	0.933751551	0.583994247	0.776103865	0.081795165	0.149322736	0.686253615	0.056649695	0.344106982	0.133561788	0.150776187	0.321432397	0.117373002	0.722552021	0.075579918	0.760041207	0.658914698	0.447495847	0.840756996	0.30171218	0.483228913	0.518392778	0.129274247	0.947165856	0.113393837	0.809812141	0.150514862	0.171704369	0.753396581	0.985942634	0.05423179	0.150219084	0.882069315	0.141282402	0.193430873	0.098245589	0.590826626	0.483915793
TCGA-D3-A3MR	3151	0	0.425151939	0.280755206	0.64613845	0.337631308	0.541328926	0.223109419	0.330067178	0.355278818	0.377426221	0.338323436	0.464058606	0.494483617	0.547735842	0.560595667	0.529609714	0.647187429	0.697853298	0.506167314	0.494524195	0.499119182	0.789179219	0.367787201	0.713640838	0.458966691	0.700530098	0.560061799	0.553931171	0.418529262	0.636558388	0.920488067	0.695293978	0.838310264	0.94208947	0.095457465	0.771359976	0.50407283	0.587187122	0.481136593	0.982786259	0.544655414	0.376291267	0.105628003	0.579200344	0.435291977	0.199909946	0.521563094	0.498989616
TCGA-D3-A3MU	1209	0	0.250983181	0.136439502	0.73456854	0.691990289	0.324246916	0.469599254	0.746313712	0.090420049	0.288683748	0.363659371	0.741523172	0.800969412	0.389346914	0.292906343	0.363372443	0.697972953	0.72847056	0.309821914	0.334811905	0.390555117	0.28617302	0.667158574	0.732636999	0.264268898	0.882045875	0.456111861	0.395846021	0.722023397	0.620376732	0.76938049	0.781770877	0.34445528	0.957144287	0.095332136	0.705729764	0.364447205	0.592478257	0.558348553	0.987003009	0.272480099	0.107118104	0.28308766	0.275747964	0.657391591	0.106062236	0.828124717	0.776638486
TCGA-D3-A3MV	1378	0	0.279073022	0.08793971	0.387234423	0.174249531	0.296906995	0.787453002	0.171292134	0.239670194	0.13428305	0.183238136	0.226393955	0.193077736	0.314475095	0.32714802	0.350606497	0.440224294	0.199250878	0.243591895	0.205450004	0.227107997	0.582124594	0.183443309	0.309661714	0.286163147	0.419883467	0.381753974	0.328553867	0.712931819	0.724752189	0.621266046	0.220567575	0.568779791	0.895207084	0.048854689	0.707001097	0.320288913	0.312005791	0.710997259	0.987191073	0.315407676	0.243911189	0.286897409	0.36733221	0.071406076	0.079589404	0.251632953	0.109417182
TCGA-D3-A51F	1695	0	0.487317583	0.421650591	0.769790405	0.396490119	0.606651001	0.265129866	0.336022417	0.329113318	0.453294528	0.474412131	0.598984709	0.64102374	0.621462798	0.662292318	0.690391167	0.643244086	0.548254041	0.65591908	0.456410561	0.490303652	0.669220007	0.42043708	0.577352067	0.509075088	0.804272281	0.672255169	0.624722482	0.307477723	0.739783624	0.931358249	0.632164729	0.734280527	0.933256527	0.091106349	0.776918332	0.568307794	0.554527602	0.461143301	0.987592507	0.66824931	0.298925983	0.226545895	0.647205878	0.542500051	0.194602891	0.633143254	0.546469482
TCGA-D3-A51H	1714	0	0.469281981	0.417063565	0.782091404	0.350191513	0.619442438	0.412852758	0.271243524	0.311717558	0.466581155	0.38427812	0.521661947	0.542919709	0.647613788	0.629633767	0.632875328	0.681705281	0.750997463	0.701000986	0.613492864	0.5805798	0.804574309	0.347545952	0.740324859	0.452477942	0.815747665	0.707898722	0.725355999	0.422908724	0.762761844	0.924820566	0.68909729	0.893745113	0.953553028	0.128842824	0.742722722	0.659735173	0.480630021	0.51405448	0.984377627	0.77629717	0.274034393	0.104426873	0.665513058	0.488295511	0.19951438	0.456216277	0.439317147
TCGA-D3-A51J	4414	0	0.408900122	0.265912985	0.844950452	0.379064186	0.39902255	0.351512445	0.260894026	0.344971815	0.280813279	0.441903448	0.727586153	0.380501758	0.523363087	0.444159609	0.353212038	0.301254047	0.730768686	0.431274622	0.358296958	0.343047403	0.814858817	0.383798821	0.655946277	0.399979335	0.416401859	0.574544605	0.474626909	0.455772782	0.41442288	0.762025554	0.463330984	0.902451439	0.950964655	0.085688723	0.781493785	0.408219907	0.500390927	0.60562845	0.985692754	0.444480431	0.451424605	0.520757208	0.44657594	0.4197308	0.153302935	0.456650582	0.720411495
TCGA-D3-A51N	688	0	0.346592666	0.138383533	0.385702004	0.332737212	0.3362307	0.178013598	0.411201441	0.345929	0.248703937	0.258632601	0.586212252	0.289824716	0.352313158	0.453257984	0.425238981	0.33500662	0.323981075	0.321624694	0.333276803	0.27079064	0.496467482	0.421537037	0.456082627	0.38109422	0.56214212	0.717128626	0.423388231	0.363775208	0.506028374	0.919774225	0.417308361	0.493054673	0.821621108	0.059833698	0.7718865	0.343751353	0.536914798	0.500932276	0.983461811	0.435135114	0.398059724	0.095654056	0.487474556	0.248533127	0.156612356	0.328540051	0.200564888
TCGA-D3-A51R	1941	0	0.09318805	0.044358024	0.209583095	0.0564826	0.161358808	0.817527397	0.059419626	0.081777645	0.033175786	0.135962908	0.067165493	0.062707471	0.113653881	0.058634137	0.682163067	0.340861956	0.09147119	0.08703643	0.109816475	0.117824491	0.372203812	0.101055789	0.381349848	0.021302387	0.63918108	0.18669944	0.365706502	0.626081655	0.759152702	0.212165816	0.09148903	0.310729178	0.849377605	0.032727014	0.454796036	0.147336381	0.189880045	0.732137888	0.973324549	0.076132875	0.083499497	0.837891147	0.091959361	0.029562115	0.064690726	0.080215014	0.047475927
TCGA-D3-A51T	818	0	0.236725161	0.095071566	0.316699049	0.141018387	0.275435733	0.360796946	0.063546718	0.114337165	0.091100468	0.188828164	0.70634532	0.332156164	0.25962111	0.3248437	0.312646188	0.438472157	0.343270403	0.266242335	0.1994235	0.257902241	0.40016519	0.173672935	0.475300342	0.293119227	0.585769735	0.642952587	0.345680388	0.49821291	0.395940914	0.352844599	0.3452627	0.434470938	0.93751797	0.053930608	0.715570901	0.185395053	0.435314429	0.533736894	0.987760339	0.367193984	0.112836392	0.486235308	0.334179334	0.145287494	0.104819926	0.504583333	0.112629278
TCGA-D3-A5GL	3826	0	0.184720074	0.09882241	0.278379554	0.169107402	0.260197908	0.865489639	0.055913607	0.071435189	0.785702396	0.20440149	0.599211058	0.201010498	0.63304611	0.314597264	0.46068179	0.219197886	0.293339469	0.249019219	0.28241832	0.257125142	0.365112682	0.119492056	0.509789502	0.215206904	0.428298124	0.271259295	0.263370474	0.39891303	0.484434447	0.506897129	0.278859932	0.415565153	0.944676463	0.024661738	0.750217359	0.209739697	0.309418941	0.777437296	0.980614985	0.40597119	0.084500079	0.499305861	0.353424662	0.543673666	0.121170835	0.440327958	0.458771103
TCGA-D3-A5GN	4129	0	0.417163265	0.207037711	0.380597845	0.449207192	0.36522238	0.249868621	0.521693074	0.236138615	0.181703092	0.338531071	0.39457688	0.552782457	0.385009525	0.489006982	0.486509165	0.421371138	0.598537893	0.354766648	0.284224255	0.349990212	0.637331695	0.558031265	0.447625776	0.44853111	0.596013812	0.470368619	0.403945828	0.625168176	0.771648845	0.812993383	0.457633752	0.628269011	0.918432787	0.102549199	0.707136905	0.361440126	0.60066421	0.49027727	0.987248244	0.480745273	0.182427455	0.23029593	0.518069301	0.270419036	0.157119128	0.545050994	0.313599655
TCGA-D3-A5GO	4195	0	0.350343482	0.18670905	0.316255888	0.187594302	0.329382013	0.555717921	0.099297855	0.139750565	0.129288411	0.211898583	0.352370132	0.123706529	0.348065573	0.345197622	0.340182046	0.363604495	0.831061301	0.255826248	0.283884432	0.289296244	0.781598336	0.215473409	0.365415551	0.378622377	0.73569636	0.472726468	0.566228235	0.363409728	0.530523943	0.393717051	0.293546676	0.901711159	0.824021471	0.042973401	0.689351166	0.18950432	0.587160075	0.57834284	0.985418478	0.414681778	0.147697271	0.137212096	0.339545809	0.200946484	0.146525438	0.196768466	0.301468896
TCGA-D3-A5GR	5424	0	0.30415209	0.305633474	0.509953415	0.512578312	0.413287307	0.428354758	0.578597433	0.390620103	0.432621649	0.381946261	0.444383158	0.616675475	0.597232223	0.586067938	0.456980406	0.505881569	0.693455686	0.442178224	0.407890448	0.412552055	0.638913627	0.513818452	0.728634896	0.440091322	0.801822368	0.691404731	0.516557908	0.610794605	0.794308104	0.903165095	0.73445062	0.611750571	0.943719838	0.134370812	0.734067538	0.713208491	0.715008075	0.642852152	0.988953884	0.524768454	0.369493347	0.387838565	0.564218642	0.383661586	0.149768244	0.660703764	0.604648384
TCGA-D3-A5GS	553	0	0.384543184	0.165888517	0.323960758	0.329112488	0.309340195	0.701927497	0.480073666	0.127326073	0.218388771	0.266524145	0.804048609	0.288344283	0.343518779	0.5151127	0.480578379	0.309908431	0.465182686	0.298716142	0.285855257	0.379074542	0.440077755	0.538988808	0.727249219	0.35322658	0.392058922	0.478995989	0.315553322	0.728720538	0.504633844	0.925339978	0.508133678	0.417482368	0.893286894	0.048810454	0.687676428	0.285186586	0.686413503	0.70415174	0.985940846	0.379371485	0.127565845	0.523517904	0.478600217	0.241738592	0.113592469	0.377880632	0.696669274
TCGA-D3-A5GT	487	0	0.099938579	0.141402532	0.299003001	0.77342857	0.155096752	0.904846779	0.107995981	0.05418319	0.072032941	0.410772097	0.824018108	0.328000017	0.155914555	0.145721792	0.134284313	0.559091306	0.114156702	0.300431382	0.118668878	0.197611957	0.237035846	0.33666467	0.58188281	0.022028622	0.505476437	0.705394005	0.41655811	0.808830706	0.809047102	0.905581285	0.444510377	0.217254294	0.93036293	0.092066482	0.688614596	0.153503617	0.198068843	0.709590827	0.987937419	0.280693958	0.059646084	0.824652561	0.138986771	0.036674663	0.064779548	0.412613687	0.472416896
TCGA-D3-A5GU	3808	0	0.280157928	0.246287612	0.880785966	0.451535698	0.265680758	0.695263882	0.820504188	0.366840188	0.562997174	0.451069678	0.804499515	0.477495767	0.490805959	0.397183301	0.565832593	0.457724052	0.75707107	0.531914064	0.294004792	0.539748801	0.325451096	0.751208016	0.749211386	0.303673514	0.449713595	0.556120411	0.536519297	0.716873383	0.492255328	0.926275184	0.492747736	0.368288784	0.939806941	0.082880898	0.670921608	0.269227524	0.825599184	0.420183478	0.9894491	0.364230149	0.43245979	0.0830812	0.378158094	0.379705426	0.123421932	0.548320105	0.801046736
TCGA-D3-A8GB	938	1	0.380663926	0.339711759	0.584545261	0.312586374	0.540600338	0.488927986	0.19073372	0.250223445	0.35008891	0.368085894	0.46289217	0.488034062	0.74057775	0.474039246	0.483411049	0.648152507	0.48256789	0.402634463	0.47653465	0.460941073	0.840458104	0.307380693	0.510594852	0.388554052	0.600959806	0.5930233	0.520496461	0.538953078	0.737093773	0.867471532	0.485869464	0.782240212	0.909776019	0.055685745	0.798570333	0.529026422	0.47588042	0.562892347	0.98660998	0.567057115	0.255050817	0.329796614	0.497846056	0.418621318	0.144399771	0.500015636	0.376127131
TCGA-D3-A8GD	718	0	0.418913454	0.364780124	0.679141867	0.505601299	0.56621809	0.46737715	0.461042772	0.290847005	0.33310494	0.385655864	0.580585399	0.438849361	0.785655767	0.601313453	0.538331592	0.722610857	0.795047376	0.602789532	0.480761289	0.46316038	0.543809946	0.488959024	0.617568403	0.420291391	0.867352249	0.561419792	0.670147748	0.525974865	0.81942993	0.928445419	0.523058806	0.611118873	0.944550838	0.150026807	0.818788225	0.48955424	0.658834654	0.479003231	0.987775229	0.548890277	0.229831277	0.30020691	0.570347493	0.562081714	0.170754004	0.480781456	0.492907557
TCGA-D3-A8GI	1780	1	0.120312474	0.204527857	0.718502537	0.702508649	0.177895341	0.793534043	0.068391923	0.043173376	0.177156665	0.118406811	0.736607351	0.110719454	0.750375076	0.087683066	0.245097173	0.394403371	0.427975392	0.322879235	0.208941622	0.200236998	0.269758552	0.123836903	0.571456168	0.034898479	0.756700587	0.458914464	0.263062797	0.845115881	0.235074469	0.18914652	0.134622229	0.281878112	0.941728434	0.039345562	0.70878426	0.168354889	0.526116571	0.727374998	0.98260687	0.205109444	0.073599377	0.781096007	0.095244845	0.121719754	0.099786892	0.457171611	0.101400037
TCGA-D3-A8GJ	7342	0	0.444129461	0.399627891	0.680942622	0.566970456	0.513632637	0.39006504	0.457872812	0.382806643	0.619809595	0.480033472	0.747295312	0.573226611	0.615844887	0.509748863	0.435585015	0.708946281	0.825091748	0.574990788	0.388235327	0.474829394	0.613837875	0.528484081	0.471314546	0.434212151	0.615102991	0.733818406	0.505026968	0.508660563	0.686475602	0.594664761	0.726064218	0.599268391	0.938457777	0.086984781	0.831255563	0.510196069	0.527126101	0.43367047	0.987723637	0.777761673	0.352068062	0.107641607	0.456179956	0.466607463	0.142181383	0.590128985	0.656657814
TCGA-D3-A8GK	5177	0	0.507063068	0.10316529	0.136612826	0.190235353	0.171544461	0.739471244	0.056210163	0.126030896	0.13387226	0.112540252	0.504719746	0.08918417	0.149688339	0.149881896	0.227724842	0.288001431	0.189294374	0.135849568	0.122306663	0.196316027	0.447323293	0.085979204	0.584177923	0.083625161	0.372699231	0.295007714	0.362191178	0.80005509	0.501884052	0.921930642	0.089693146	0.312314852	0.927100835	0.02175358	0.622790381	0.128363039	0.1842617	0.687436548	0.980155822	0.161450879	0.143727538	0.8413807	0.131539743	0.052834243	0.046241156	0.138519368	0.078784323
TCGA-D3-A8GL	2711	1	0.0748332	0.09705792	0.871812763	0.784255195	0.222255369	0.870418876	0.883701648	0.553620375	0.885455921	0.165540288	0.849958599	0.083614983	0.783821107	0.822852467	0.187982538	0.800801924	0.82475296	0.277814905	0.268018528	0.439153448	0.307136768	0.795066352	0.742085509	0.029529193	0.338416862	0.678063902	0.583960916	0.826110677	0.818235272	0.923070076	0.879437837	0.193769435	0.941181917	0.126929012	0.818727123	0.88801835	0.907759563	0.705916218	0.982293447	0.054435594	0.603876345	0.861286331	0.869682404	0.03557572	0.094881129	0.119551982	0.850278169
TCGA-D3-A8GM	3259	1	0.350588684	0.347389003	0.461917848	0.345601484	0.385861661	0.211363684	0.245355161	0.175769574	0.367497528	0.388758857	0.330961966	0.27895942	0.331264424	0.281580032	0.363853561	0.384861142	0.456536536	0.394843346	0.341544025	0.448325182	0.380680572	0.430664645	0.657847521	0.303854565	0.645731453	0.549142367	0.477665833	0.63760442	0.35468327	0.904840386	0.406189311	0.459087456	0.939307475	0.049922876	0.675443506	0.303418021	0.784282139	0.536165524	0.988212429	0.451412867	0.193075717	0.529788873	0.316257198	0.287603144	0.143609839	0.472768644	0.500031699
TCGA-D3-A8GP	4638	0	0.118715573	0.390863659	0.856323967	0.680865025	0.19903112	0.474879071	0.693066679	0.052463128	0.398624164	0.458272817	0.65694721	0.650421879	0.5641594	0.14061838	0.218020275	0.358023625	0.484137555	0.38794039	0.233121787	0.574288295	0.22436489	0.812859523	0.720687281	0.066019681	0.111368087	0.561124457	0.522881472	0.823513058	0.697371291	0.93149074	0.354010094	0.145689871	0.93951649	0.127274416	0.751597942	0.400792453	0.86785037	0.562438728	0.987896868	0.122515322	0.098468493	0.715785671	0.151858081	0.131945107	0.112705405	0.641745626	0.753717426
TCGA-D3-A8GQ	884	1	0.25795085	0.180073155	0.625153067	0.195249271	0.349642885	0.679095006	0.086002203	0.169553714	0.170200145	0.204155462	0.711405342	0.231407995	0.503194325	0.387967208	0.427579373	0.437598057	0.692956187	0.359882374	0.302298216	0.340058037	0.523758954	0.171897461	0.403291123	0.286810618	0.399366792	0.479365595	0.378173142	0.71655503	0.832259499	0.879882185	0.335654922	0.546085834	0.866847386	0.031571663	0.752330033	0.4625561	0.334601206	0.736385273	0.983372463	0.423137284	0.142805287	0.650446145	0.383736788	0.203700204	0.137794993	0.386157919	0.166733058
TCGA-D3-A8GS	3564	1	0.336527042	0.244190472	0.4611575	0.455952685	0.448604073	0.317473676	0.266358188	0.22700133	0.306103857	0.325030751	0.686595509	0.629401014	0.66890788	0.499168983	0.444530167	0.575384174	0.422954656	0.42273092	0.400900865	0.348276657	0.631384178	0.281793958	0.757341672	0.410076051	0.853916704	0.633567734	0.395481272	0.530701738	0.789754376	0.944653416	0.544860916	0.56984297	0.882361927	0.054152093	0.724718251	0.488076243	0.724366033	0.594783021	0.984468907	0.568370919	0.190803359	0.050501889	0.482387172	0.298206213	0.129040579	0.601373678	0.423277404
TCGA-D9-A3Z1	468	1	0.465125193	0.35556246	0.738186226	0.514319253	0.479596442	0.56784032	0.309419185	0.354840255	0.418828188	0.45374443	0.495470382	0.437212689	0.791123721	0.576735716	0.500945474	0.49916456	0.616019148	0.566947453	0.53102813	0.454716375	0.644745289	0.365706816	0.534649417	0.459927109	0.786481038	0.591293166	0.679676786	0.533349729	0.551363916	0.72636702	0.681355536	0.698100629	0.927141319	0.11737765	0.783558627	0.618510524	0.610459456	0.576062901	0.988853323	0.620667546	0.327845127	0.427234674	0.574825572	0.478518095	0.236888906	0.468033545	0.499972379
TCGA-D9-A3Z3	678	0	0.440076447	0.239245808	0.550806795	0.551100585	0.445183199	0.619029139	0.320144696	0.240557107	0.385458521	0.379958218	0.565194531	0.35158352	0.748339164	0.574481072	0.462736449	0.348427627	0.472833198	0.490577891	0.387785092	0.422586523	0.467365217	0.442948223	0.394006222	0.442956001	0.596540299	0.456017808	0.450157271	0.618799713	0.497498724	0.479891709	0.597289394	0.555728239	0.950767271	0.086877123	0.636392376	0.356708275	0.453770245	0.584644922	0.986482294	0.527111413	0.243213776	0.600687746	0.524806286	0.390061129	0.183720312	0.466997605	0.291106978
TCGA-D9-A3Z4	519	1	0.345915301	0.162917726	0.422478727	0.262559769	0.368877664	0.549025869	0.194254217	0.234580798	0.200114495	0.244055674	0.325040073	0.253231549	0.384707657	0.474404182	0.371303896	0.493462887	0.729425838	0.314594086	0.296734119	0.287932093	0.367962696	0.248003993	0.497909262	0.369072412	0.314650015	0.509591166	0.407998129	0.729894745	0.555689724	0.915645752	0.520807324	0.428689254	0.851830617	0.061913515	0.718025618	0.295397649	0.392070136	0.620671292	0.98918297	0.399438563	0.209472845	0.4258192	0.428745599	0.252829433	0.155809469	0.330988904	0.194554595
TCGA-D9-A4Z2	190	1	0.204005551	0.06889469	0.217629081	0.2765687	0.308003673	0.747117223	0.075215867	0.121221434	0.077793878	0.121085576	0.232456997	0.145390814	0.448956428	0.266348044	0.244620242	0.442932091	0.527559498	0.17459206	0.182941998	0.302712693	0.572248173	0.143772404	0.341342064	0.217957603	0.292025583	0.439419302	0.492084169	0.786735729	0.341644544	0.564710524	0.185920495	0.395757624	0.877830776	0.037161064	0.726138689	0.28938334	0.370560285	0.738145371	0.988039877	0.344566213	0.118564193	0.105359188	0.22443149	0.064372955	0.085591811	0.244371024	0.096635259
TCGA-D9-A4Z3	505	0	0.229961645	0.130543377	0.863496693	0.319466047	0.182318504	0.568452607	0.227906276	0.136382829	0.09361639	0.127254727	0.728041988	0.476916183	0.791176135	0.281130104	0.379947393	0.276797682	0.604358315	0.147075085	0.198470245	0.179252115	0.250282167	0.278532019	0.55398263	0.267374511	0.506783507	0.3473363	0.290217146	0.595831302	0.784351952	0.903538401	0.578616813	0.303800389	0.939467166	0.025518992	0.6448023	0.433969116	0.262166285	0.620976879	0.987812724	0.329621143	0.151175215	0.549674369	0.346471101	0.170487504	0.11048996	0.3731605	0.130097997
TCGA-D9-A4Z5	218	0	0.102787299	0.035931749	0.291101476	0.094597256	0.216297119	0.83446958	0.046727373	0.028941721	0.093578561	0.133755824	0.687733956	0.096464326	0.539978723	0.123094314	0.099740005	0.662991965	0.151071211	0.156963507	0.154151639	0.126867619	0.156796502	0.094429777	0.16225363	0.030820633	0.040749096	0.470396712	0.42132725	0.79714352	0.27411451	0.059840876	0.148616779	0.20794834	0.91604026	0.038412001	0.604188649	0.120312909	0.14207719	0.743865697	0.98502951	0.153301545	0.062036273	0.8402452	0.12662213	0.110408274	0.035248363	0.141495326	0.124790756
TCGA-D9-A4Z6	561	1	0.193853527	0.200331768	0.255015531	0.132197756	0.235208615	0.7475825	0.036566367	0.056096619	0.036440665	0.236289623	0.141060442	0.10246218	0.265562079	0.166972441	0.262893947	0.38582721	0.232655451	0.210032945	0.222323988	0.291621501	0.330622203	0.057494526	0.325319699	0.158711088	0.408096756	0.263555796	0.342603065	0.75230055	0.524802978	0.58346009	0.229781834	0.345716385	0.947886602	0.042454129	0.596401699	0.297017521	0.354689888	0.752346726	0.984691033	0.396764868	0.071376798	0.673546328	0.176091442	0.089747793	0.093829595	0.197622643	0.081493573
TCGA-D9-A6E9	301	0	0.447137312	0.501338182	0.659064743	0.625526597	0.422812931	0.454130702	0.423394194	0.356641642	0.669300512	0.504526052	0.602812564	0.557476439	0.408973395	0.545930097	0.538370187	0.597649847	0.808174083	0.50552406	0.40084301	0.497277343	0.634577123	0.562602818	0.427900181	0.449693141	0.728134256	0.646319367	0.550170465	0.419637419	0.831594529	0.854057323	0.892180934	0.650626236	0.919280964	0.145467783	0.773822394	0.496579165	0.74839314	0.517379449	0.988745049	0.649859855	0.350558619	0.459623672	0.520959105	0.581756532	0.185236929	0.574323495	0.748648328
TCGA-D9-A6EA	766	0	0.17235463	0.0592316	0.770649737	0.686844899	0.21406269	0.471916477	0.358951701	0.633246814	0.085825501	0.126044827	0.808655604	0.348266023	0.556563075	0.162822141	0.460482048	0.752987234	0.755112747	0.530668392	0.267389074	0.317321399	0.783750825	0.398592351	0.698636605	0.194095031	0.796766069	0.428948934	0.624328532	0.735346315	0.727286315	0.661007861	0.465332391	0.713910068	0.766189545	0.247523533	0.769553524	0.13635155	0.195288373	0.475876048	0.98614304	0.312868449	0.671259986	0.774922525	0.197611188	0.473324018	0.051292495	0.367953347	0.596686507
TCGA-D9-A6EC	2015	0	0.106036846	0.115779667	0.284516203	0.748578925	0.125732799	0.804698277	0.920301432	0.028690147	0.069117785	0.307144204	0.839474766	0.740550799	0.548658648	0.107831822	0.183232303	0.695582339	0.760178687	0.13523947	0.13056718	0.337538191	0.363159978	0.748157105	0.639633566	0.028739963	0.910649998	0.460175984	0.595907967	0.767647397	0.722853935	0.173777721	0.900245777	0.200479538	0.938525382	0.15884016	0.792111558	0.058269424	0.186402188	0.604522073	0.985610177	0.103980573	0.047630131	0.79669017	0.093146666	0.45686557	0.044734824	0.791844112	0.459549081
TCGA-D9-A6EG	698	1	0.103201675	0.104338893	0.147454602	0.545321501	0.199384037	0.916712948	0.097570004	0.032713045	0.124221681	0.342430716	0.113945669	0.24493086	0.153027942	0.067418969	0.151992772	0.408608664	0.147954814	0.085222931	0.13231879	0.205605968	0.235854384	0.071726316	0.272593698	0.044282075	0.129675914	0.422920712	0.149691324	0.825785214	0.385439894	0.100040721	0.067814976	0.156689983	0.907959994	0.033762975	0.771232413	0.106644773	0.369973627	0.824465392	0.989674764	0.164933563	0.051333111	0.818029965	0.106634942	0.055819388	0.070531904	0.759696188	0.253727932
TCGA-DA-A1HV	1502	0	0.358385456	0.204561321	0.402931825	0.500837683	0.407612246	0.161753721	0.203413052	0.228655195	0.255953254	0.375632924	0.563584843	0.342494179	0.424279317	0.471032179	0.31058039	0.4208307	0.366731432	0.386056682	0.310005415	0.349292365	0.471383511	0.280540697	0.583101331	0.41316483	0.575977603	0.501629633	0.413768819	0.234978198	0.678941289	0.932985739	0.476857905	0.509470838	0.937846643	0.078551211	0.750171673	0.340322249	0.750548304	0.521626608	0.986380428	0.418470154	0.25604301	0.12035577	0.459777297	0.32292574	0.189828253	0.427220017	0.303247337
TCGA-DA-A1HW	428	0	0.432136376	0.216108791	0.409472872	0.358262655	0.465359189	0.633945479	0.228984937	0.265346261	0.286137244	0.422725769	0.449140645	0.400636408	0.445059984	0.539602749	0.421851548	0.44370993	0.353493852	0.474452591	0.382005161	0.393892913	0.508000142	0.314506782	0.357060713	0.427081249	0.540002673	0.416911597	0.399819439	0.561366615	0.494362105	0.737289895	0.484105551	0.582920684	0.940358184	0.089191011	0.691900258	0.362905871	0.478556014	0.61502995	0.98783008	0.454926189	0.245267633	0.631228678	0.486011681	0.436033831	0.193607783	0.379377412	0.28352138
TCGA-DA-A1HY	3580	0	0.222090981	0.139556577	0.278636736	0.187682069	0.287882381	0.465465855	0.097983193	0.079986189	0.1088584	0.178999585	0.577711259	0.258575711	0.703996908	0.289575188	0.352122683	0.47956264	0.261023962	0.252756756	0.264601301	0.224325304	0.51160751	0.22718944	0.671898956	0.157011242	0.405229939	0.483005086	0.414888667	0.296016636	0.786736284	0.938274158	0.349696517	0.424839712	0.911105879	0.042711716	0.762818608	0.266063311	0.469527155	0.663554988	0.987709352	0.256966983	0.127395154	0.53780044	0.241886267	0.132628905	0.13672203	0.290255284	0.095429293
TCGA-DA-A1I0	594	0	0.372070233	0.378874128	0.727376283	0.512966464	0.380851524	0.834646584	0.259161115	0.244856959	0.227889276	0.38760938	0.359334094	0.408720395	0.42618017	0.490565701	0.457876731	0.497632987	0.716535389	0.38193731	0.336225813	0.429706131	0.65171245	0.383104083	0.686892824	0.397033684	0.747141504	0.478663149	0.478390512	0.467215878	0.758218552	0.848290343	0.451285466	0.646731554	0.939344305	0.073593551	0.779331068	0.533633544	0.511872574	0.708907801	0.988151151	0.440381033	0.264282805	0.49673179	0.504367443	0.192647163	0.160098208	0.472686437	0.423549398
TCGA-DA-A1I1	5941	0	0.453470953	0.269066798	0.848153749	0.313753461	0.369885586	0.335195895	0.310259708	0.265823137	0.489309054	0.34647679	0.675503659	0.706525388	0.385958573	0.563996055	0.378033482	0.355346557	0.559129651	0.374317235	0.329603968	0.387438974	0.450299002	0.395477235	0.453925953	0.422904479	0.332938612	0.617120148	0.460212071	0.598876648	0.400466353	0.598988205	0.750422194	0.502352597	0.951504661	0.118610156	0.669330656	0.376719172	0.769885106	0.54441478	0.987601432	0.491874395	0.288986329	0.227537434	0.49533122	0.439291311	0.214307117	0.509962175	0.776041838
TCGA-DA-A1I2	5088	0	0.175945347	0.241172329	0.232536145	0.412484108	0.453763739	0.652261076	0.442929587	0.090181858	0.150294063	0.308113117	0.227697126	0.302531313	0.29073677	0.339467948	0.36312024	0.434815408	0.675081861	0.326918964	0.249489307	0.60335649	0.749222926	0.407832666	0.650408659	0.316447315	0.350892473	0.585237101	0.496438059	0.742610283	0.717097508	0.935081273	0.443686449	0.598341278	0.907189624	0.09285448	0.741407637	0.552069579	0.594752571	0.545561655	0.990370072	0.315157001	0.093043086	0.441337711	0.288482589	0.179445806	0.107841961	0.436844403	0.788521276
TCGA-DA-A1I4	1093	1	0.290712688	0.194175915	0.475243641	0.258652051	0.426174315	0.873803408	0.103724461	0.063383156	0.119824898	0.234057372	0.378463752	0.212716321	0.418726192	0.463186234	0.487703089	0.350483206	0.37233297	0.420066711	0.370571488	0.344342229	0.459169141	0.087779799	0.475853994	0.28423618	0.455072842	0.50720092	0.428118432	0.811222273	0.458764756	0.941938688	0.342806984	0.533603872	0.90118766	0.033663174	0.649180959	0.463276222	0.436663196	0.681397603	0.988366448	0.415798569	0.095223661	0.574359668	0.405929108	0.087896071	0.109275416	0.260593996	0.183109344
TCGA-DA-A1I5	3280	0	0.427584855	0.326270765	0.49028011	0.415325903	0.408798212	0.564497185	0.179385964	0.207779658	0.237347203	0.438951807	0.345023781	0.253230461	0.441173022	0.487223369	0.388692121	0.328163497	0.39849028	0.423962955	0.424231915	0.374317127	0.507284807	0.258436027	0.510669467	0.464253705	0.438184231	0.452734796	0.415217367	0.389859646	0.846152976	0.770726973	0.464010311	0.57429407	0.939465091	0.070889925	0.752341808	0.405096941	0.504055581	0.60090446	0.989275113	0.479572588	0.193687175	0.356414649	0.492393998	0.296703414	0.153621283	0.440114135	0.645022847
TCGA-DA-A1I7	1876	0	0.302474519	0.229240793	0.522756746	0.611672249	0.362526907	0.707118964	0.437199937	0.361881946	0.215592429	0.460056105	0.288860482	0.448646426	0.448834917	0.74333404	0.728697791	0.662744947	0.524006475	0.305785023	0.262613988	0.331955023	0.69448517	0.63037922	0.711972177	0.308707874	0.749637757	0.786103458	0.355885714	0.717174765	0.838630033	0.877044191	0.34356011	0.802787221	0.918115625	0.066327877	0.829278167	0.703849958	0.600306485	0.526998933	0.988283121	0.339469609	0.320890261	0.241267782	0.712369662	0.225868463	0.157365386	0.492874146	0.208535042
TCGA-DA-A1I8	1368	0	0.488972619	0.138614098	0.737820952	0.296508612	0.342885795	0.687297888	0.348567114	0.472526551	0.054074261	0.143318485	0.720546421	0.143551651	0.806543779	0.35007127	0.232289389	0.580114289	0.297789887	0.288123318	0.245753407	0.288126748	0.816083357	0.327893854	0.528505672	0.211110904	0.524863238	0.718103886	0.527970934	0.494333911	0.857212474	0.935254976	0.226944129	0.751581491	0.891267343	0.027010311	0.732451003	0.34330364	0.376176853	0.83888933	0.990164876	0.321501686	0.593882505	0.427220062	0.33039432	0.037766429	0.133656135	0.190070422	0.056801318
TCGA-DA-A1IA	2005	1	0.119518386	0.10613321	0.623454055	0.373712213	0.140750818	0.835645005	0.103565694	0.079395382	0.203315006	0.158640084	0.904358995	0.091835787	0.66064281	0.197684156	0.250545945	0.326855498	0.814162463	0.278187344	0.168827602	0.203413997	0.23981549	0.093675464	0.725511114	0.174215472	0.105549215	0.465781459	0.269419961	0.832574758	0.458790578	0.816072255	0.24230799	0.174756845	0.943721136	0.034814332	0.730871368	0.268453667	0.381073429	0.739914827	0.987557323	0.186778167	0.068029379	0.650952815	0.160604743	0.05194205	0.082684769	0.211288294	0.476623488
TCGA-DA-A1IB	454	0	0.522024278	0.495339442	0.849051581	0.45925354	0.609598065	0.431836894	0.388960223	0.39052014	0.573580835	0.50542208	0.623722578	0.715916972	0.723861786	0.764224575	0.668409309	0.697637725	0.65859364	0.675848996	0.546903168	0.524696275	0.758223469	0.47632887	0.73101635	0.522889299	0.815622686	0.744698385	0.74605211	0.453895969	0.763609802	0.947498458	0.751428896	0.81916411	0.945035913	0.110011987	0.816212262	0.659992435	0.571686384	0.468337832	0.991187938	0.723052664	0.337037405	0.297207294	0.71837294	0.584360863	0.206007072	0.652862456	0.601529434
TCGA-DA-A1IC	2071	1	0.324949192	0.158951012	0.339504189	0.436035875	0.279774583	0.850916996	0.16874394	0.164496761	0.698868303	0.246083875	0.665098021	0.57907332	0.331620442	0.342015199	0.410909983	0.259754593	0.291551333	0.298556137	0.293190836	0.288961784	0.346634907	0.208990743	0.660138358	0.303002554	0.298122339	0.521585423	0.533502329	0.751954435	0.827331821	0.749794671	0.318935756	0.35895611	0.94958969	0.035556814	0.829029803	0.308581543	0.495922819	0.676933835	0.987483056	0.27692299	0.173134817	0.163165377	0.27436384	0.443613785	0.165038362	0.582886756	0.277826666
TCGA-DA-A3F2	657	0	0.495872553	0.371947041	0.745534788	0.414278953	0.577107068	0.454781746	0.244477205	0.313350299	0.458724096	0.397944832	0.481792588	0.521180768	0.650537592	0.589841643	0.597272101	0.56701979	0.672067651	0.600609664	0.568211092	0.48524647	0.724502424	0.338413745	0.690305721	0.477670991	0.754171768	0.702573111	0.649512386	0.430276454	0.775707579	0.939131694	0.628127993	0.772234163	0.946013871	0.120500893	0.800326763	0.612211351	0.546641403	0.575233934	0.985666773	0.713701394	0.301894962	0.20222536	0.595284697	0.456331591	0.249639444	0.532107978	0.478752702
TCGA-DA-A3F3	319	1	0.168492178	0.069984558	0.175957002	0.13583842	0.183958355	0.329490755	0.058973631	0.09413498	0.078890162	0.137785208	0.106424173	0.109005419	0.172830526	0.188402271	0.164908436	0.503982842	0.393531784	0.132907194	0.130123197	0.170314765	0.319496285	0.130260123	0.196133589	0.138800091	0.179283928	0.331043439	0.288254424	0.786893853	0.708094226	0.129590637	0.239592815	0.201314301	0.620813298	0.025526032	0.637409209	0.120046083	0.169672921	0.587353333	0.986858251	0.133514024	0.132999854	0.827491462	0.169141462	0.098210051	0.059633355	0.165620227	0.078071576
TCGA-DA-A3F5	6446	0	0.305372566	0.433592542	0.519167217	0.383039004	0.3865349	0.868561999	0.617909323	0.550904145	0.197033575	0.453804244	0.639765929	0.453641242	0.826332004	0.409780778	0.756086629	0.747907002	0.647627399	0.46289061	0.326708825	0.426798045	0.726496868	0.500034636	0.775473307	0.199218962	0.73749435	0.799898198	0.421462086	0.511940071	0.758045523	0.943999656	0.573930342	0.788720758	0.963094569	0.059954411	0.690230414	0.866848847	0.729232231	0.757492208	0.986480996	0.471309635	0.671432249	0.144809333	0.430022033	0.122770646	0.124003204	0.76619098	0.640659371
TCGA-DA-A3F8	492	0	0.484976492	0.284145828	0.670243305	0.392012283	0.467255701	0.211571451	0.389950961	0.320735439	0.423194256	0.423940513	0.735615495	0.618105333	0.561179397	0.591204192	0.439626935	0.514200505	0.462578868	0.49919754	0.46136113	0.411277813	0.539063416	0.430172037	0.672451141	0.487335766	0.547510523	0.719054731	0.55610731	0.397764991	0.492144725	0.933544856	0.53820703	0.632448955	0.878003454	0.128261263	0.656452056	0.51743029	0.50828253	0.484343285	0.985693507	0.587785431	0.294082556	0.419616578	0.553133347	0.539213116	0.193811758	0.545209245	0.700984929
TCGA-DA-A95X	1513	0	0.544009228	0.149897977	0.772808109	0.729155866	0.291168069	0.464733661	0.175661612	0.719312525	0.519825644	0.202636118	0.803616636	0.596646752	0.789405035	0.356820522	0.303747943	0.635425871	0.800627967	0.227900695	0.297736904	0.63022631	0.85974568	0.216483807	0.620259777	0.26649018	0.732191665	0.802206738	0.472926921	0.692409673	0.737583846	0.933254399	0.897850633	0.900237903	0.950229022	0.074473197	0.837555874	0.217033672	0.707190023	0.742047567	0.986148635	0.350497195	0.765538241	0.730834249	0.585228151	0.284781168	0.11596543	0.727032354	0.445191574
TCGA-DA-A95Y	430	1	0.175304878	0.083981627	0.231846905	0.161225798	0.207323974	0.862829359	0.048951818	0.075868623	0.205631159	0.470157117	0.144542018	0.112090039	0.224579173	0.271018986	0.221912492	0.314488022	0.198337738	0.218578791	0.203190026	0.238813472	0.274697906	0.154617046	0.476869728	0.21294725	0.265377929	0.292933521	0.285634192	0.670085863	0.390669978	0.168490911	0.412084421	0.269925107	0.872790705	0.041733319	0.782643684	0.201558714	0.318200531	0.653938842	0.98714128	0.278047901	0.098477001	0.477818578	0.291112474	0.146187139	0.092924164	0.200279861	0.219918544
TCGA-DA-A960	804	0	0.142042365	0.214410346	0.347735844	0.261315067	0.182621196	0.80908714	0.085517129	0.02559889	0.672733313	0.17884565	0.848751436	0.139540624	0.815718367	0.205053255	0.168574089	0.22644409	0.104144255	0.117032746	0.137347234	0.305453523	0.292698072	0.066133393	0.612151482	0.071854647	0.446601021	0.660995005	0.456373268	0.610493499	0.319588256	0.109223641	0.256923924	0.232378836	0.92976586	0.029018826	0.789080564	0.085148393	0.300278189	0.662620599	0.985426311	0.14452675	0.039327345	0.820221781	0.328028523	0.033980252	0.06113928	0.396432613	0.188550679
TCGA-EB-A1NK	613	0	0.310461804	0.173382045	0.392632551	0.218431431	0.341137783	0.813875785	0.100721375	0.146795987	0.438270336	0.197925902	0.392779531	0.400825283	0.389283278	0.327134455	0.373289565	0.239500648	0.35209264	0.301194057	0.268844133	0.361013145	0.456842463	0.173385087	0.391586654	0.287742864	0.454385046	0.398759159	0.339762626	0.622885233	0.361605539	0.90113636	0.367732552	0.490000025	0.943239519	0.040045181	0.762051861	0.321536818	0.33520943	0.654129304	0.98748477	0.349387552	0.148491761	0.644904887	0.306678362	0.134206656	0.138344613	0.411010114	0.253029273
TCGA-EB-A24D	645	0	0.285639785	0.160968166	0.485385363	0.263524471	0.305236131	0.795935595	0.559591798	0.168737535	0.272942635	0.253606254	0.824444029	0.40652296	0.543027554	0.326057409	0.325285716	0.527339097	0.743504253	0.35787599	0.236791945	0.329343786	0.799458579	0.511351864	0.67896529	0.308646249	0.299651667	0.702594799	0.398540069	0.690790371	0.685541487	0.935827964	0.800708828	0.849018632	0.886599673	0.042117642	0.753441772	0.262121286	0.509072024	0.575240108	0.989171893	0.303611512	0.164136121	0.477479216	0.291725742	0.237931251	0.235623769	0.383371017	0.833078013
TCGA-EB-A299	378	0	0.322238221	0.208533437	0.369521362	0.377321841	0.331632999	0.760928562	0.254230023	0.179083215	0.170181698	0.233197507	0.283255972	0.398713631	0.513575804	0.37415983	0.377612928	0.476595645	0.307754611	0.310513724	0.329040111	0.322889537	0.603040806	0.249823072	0.440835577	0.288840613	0.367979054	0.621917377	0.570744428	0.695143248	0.437893942	0.942275318	0.329984823	0.433180845	0.891988321	0.059872387	0.835700329	0.246843826	0.522598703	0.695158664	0.987804278	0.321201352	0.212425163	0.278625419	0.28740916	0.198054883	0.155254325	0.410138658	0.20859262
TCGA-EB-A3HV	39	0	0.305755878	0.189151838	0.466519189	0.554424991	0.328588978	0.846673944	0.445927444	0.240748505	0.248060842	0.460545103	0.409179013	0.786161825	0.659546951	0.204303151	0.272578618	0.58368087	0.479648007	0.362809291	0.244808074	0.363504062	0.63770509	0.457802772	0.684830602	0.15211381	0.729718447	0.545714753	0.374512963	0.742290351	0.656907604	0.709475274	0.333517872	0.489149686	0.947872749	0.204874502	0.69826045	0.302613118	0.696244545	0.752782576	0.9886076	0.289218613	0.274776293	0.77365801	0.227805222	0.448254516	0.103578576	0.74072405	0.673951263
TCGA-EB-A3XC	650	0	0.346375252	0.17626324	0.323610999	0.496024787	0.346841097	0.613750722	0.20772789	0.1731561	0.155579958	0.258468142	0.438405162	0.304532053	0.449398809	0.408309706	0.285746269	0.536868697	0.398608202	0.282301842	0.26970729	0.335748365	0.435922182	0.244167679	0.463365364	0.36303359	0.773779518	0.470810946	0.501820357	0.70666704	0.688922136	0.478277692	0.383621881	0.471164971	0.897116163	0.059526542	0.711090477	0.224201739	0.449784389	0.657601221	0.987716806	0.38498831	0.194000682	0.646976147	0.39769727	0.313753136	0.156654437	0.375638132	0.217430894
TCGA-EB-A3XE	180	0	0.2880931	0.249392958	0.631351911	0.383468167	0.370819357	0.578922854	0.144697315	0.261418901	0.307168648	0.295968127	0.413245969	0.368370609	0.371385869	0.521692691	0.425362767	0.485366404	0.490540933	0.317141103	0.289899283	0.36290032	0.57853904	0.263217851	0.418008999	0.416240673	0.324963408	0.662257416	0.6705965	0.679642974	0.509922561	0.906908957	0.587308892	0.59285779	0.924694907	0.059578717	0.781424234	0.439639229	0.467171108	0.650572004	0.991524574	0.497891664	0.298573215	0.53173595	0.522575687	0.357909446	0.203088682	0.416025786	0.285085266
TCGA-EB-A3XF	278	0	0.327107311	0.215617901	0.425230303	0.422107679	0.340822851	0.77840235	0.155232092	0.186229711	0.260919112	0.242968687	0.459165663	0.191670208	0.349911259	0.41302079	0.315043468	0.304637231	0.338757153	0.27367642	0.303400956	0.315691874	0.433546005	0.196328816	0.486149209	0.305699664	0.289519684	0.405812796	0.459251934	0.610259111	0.359516647	0.605561102	0.345812034	0.456645384	0.955120368	0.04982651	0.610211587	0.242837335	0.396748882	0.795035384	0.987008371	0.436541954	0.207638663	0.734531616	0.409414206	0.1715423	0.121363013	0.260625846	0.212223534
TCGA-EB-A3Y6	126	0	0.343679286	0.179887262	0.363275904	0.270891699	0.347114146	0.602549469	0.130476023	0.215667156	0.119656313	0.366654356	0.322401684	0.328917041	0.409265926	0.478678649	0.361912042	0.333290829	0.404990713	0.340857674	0.223722557	0.343767379	0.457056845	0.200051432	0.419270075	0.355794026	0.371656826	0.413601284	0.361150347	0.702514875	0.414097053	0.768923465	0.475095793	0.506033614	0.871341654	0.057226366	0.670004836	0.353017254	0.442067532	0.647377363	0.98746989	0.472368566	0.197193712	0.425075353	0.480871582	0.237086583	0.151476937	0.491571317	0.51253771
TCGA-EB-A3Y7	326	1	0.421318805	0.272442894	0.49741223	0.232126139	0.417761331	0.806958508	0.11341957	0.152777141	0.44181539	0.201115225	0.293968101	0.180188584	0.462505094	0.563812618	0.461798375	0.375085261	0.436994465	0.38488794	0.398505984	0.356680155	0.490528287	0.171301889	0.427738	0.339307598	0.432017827	0.565034281	0.444518961	0.771315862	0.410939787	0.531019892	0.457953209	0.546738444	0.949571805	0.041224965	0.65710836	0.421265785	0.439050551	0.692789558	0.988060967	0.535800822	0.170025183	0.61121793	0.509611617	0.164829769	0.153551797	0.288618054	0.157915898
TCGA-EB-A41B	291	0	0.290266838	0.158711816	0.323935863	0.210267721	0.270709165	0.866517359	0.178803984	0.568180362	0.154990109	0.310392459	0.311593424	0.183688208	0.865659181	0.326561987	0.635832153	0.210935484	0.257473089	0.237797293	0.294746764	0.344131326	0.460585265	0.274649217	0.589828037	0.283502589	0.333050105	0.576455234	0.413374524	0.765791479	0.751558736	0.161174658	0.368907614	0.453624623	0.733819024	0.044992292	0.672684351	0.217887639	0.36708164	0.709342096	0.987871977	0.35124232	0.51277113	0.797802387	0.379699924	0.291974582	0.130132988	0.237005452	0.323325061
TCGA-EB-A42Y	440	0	0.115942181	0.194474677	0.247275505	0.445603399	0.289255582	0.77142578	0.904404899	0.082498284	0.14926696	0.466296524	0.188914408	0.331198757	0.502011136	0.284947865	0.242906111	0.203786771	0.787694057	0.237243633	0.329656492	0.208706145	0.359453646	0.821442588	0.735669869	0.196819422	0.406313309	0.479624185	0.271592543	0.806118623	0.44572034	0.642747514	0.299128887	0.351176709	0.783789406	0.033674151	0.686500972	0.126828116	0.418858928	0.63801936	0.989592514	0.323604535	0.107920206	0.174440564	0.214817914	0.086997801	0.100468614	0.433668294	0.890359136
TCGA-EB-A42Z	441	0	0.568856279	0.135062299	0.430327597	0.346389082	0.300782955	0.814261475	0.175912956	0.49985845	0.262284149	0.426706665	0.460850779	0.150963124	0.526041661	0.279704249	0.498623272	0.520447359	0.483661942	0.357840827	0.272711157	0.30089015	0.762270038	0.259342197	0.538721434	0.239889595	0.50947592	0.711652243	0.438384777	0.779289201	0.75291678	0.848972454	0.32486284	0.671045953	0.904957069	0.07503881	0.830958165	0.252929456	0.531919143	0.634202264	0.985052756	0.306303454	0.544176816	0.144082845	0.295315439	0.20228645	0.073483381	0.218181138	0.220666626
TCGA-EB-A431	568	0	0.233093006	0.148817088	0.370825736	0.138215754	0.32567523	0.74194478	0.076458723	0.081277168	0.072811435	0.219605723	0.414172283	0.15248039	0.34462236	0.243644578	0.363753406	0.304463859	0.31477851	0.328164818	0.213787551	0.258275319	0.37358638	0.13362195	0.32809912	0.25526049	0.313983574	0.454871238	0.355386641	0.456764066	0.378644929	0.311296022	0.306988863	0.470560451	0.942387835	0.032801229	0.636903972	0.201941955	0.37533337	0.576223652	0.982967225	0.394771798	0.131870526	0.474159041	0.215453603	0.120959262	0.111617046	0.441298928	0.119202023
TCGA-EB-A44N	205	1	0.417977828	0.251590845	0.470083699	0.310846486	0.414330005	0.435651306	0.226706558	0.330604376	0.274064996	0.394300204	0.40930247	0.581919195	0.436680146	0.516822684	0.462524041	0.453680863	0.43401286	0.425651259	0.412762059	0.355807777	0.597989094	0.306874046	0.471583616	0.424229137	0.490363456	0.503112883	0.438539997	0.54276319	0.752088969	0.788569239	0.5146836	0.608175369	0.898065149	0.078854067	0.712028617	0.42697001	0.472435708	0.603593933	0.986827163	0.47278048	0.316663764	0.384078554	0.556446833	0.398139248	0.186053502	0.465663069	0.340839606
TCGA-EB-A44O	81	0	0.308477754	0.09818202	0.285874475	0.332775069	0.283849568	0.738431894	0.113223992	0.138347624	0.081261478	0.311525306	0.23618452	0.33377936	0.306901786	0.287823648	0.239870955	0.250008881	0.222772312	0.245350802	0.219872699	0.21540301	0.337947478	0.17424197	0.331225992	0.284932632	0.229083337	0.302961589	0.255641622	0.255588043	0.279608291	0.67514813	0.269381386	0.400779995	0.904113857	0.040787755	0.793024048	0.224090303	0.544596487	0.688078109	0.98461004	0.234878748	0.164096878	0.437355048	0.271192101	0.217206354	0.123917406	0.337526059	0.133432693
TCGA-EB-A44P	376	0	0.207033302	0.134471306	0.61365421	0.243458643	0.304110645	0.413124346	0.175161892	0.14269895	0.178091919	0.318905244	0.278219198	0.44259054	0.436263714	0.284509991	0.382413327	0.552511781	0.274906031	0.311757971	0.262556283	0.199524988	0.33539238	0.216625078	0.422936142	0.289845394	0.426815732	0.653466298	0.461244935	0.739621974	0.293154093	0.703869165	0.338331115	0.380838193	0.944142128	0.043390223	0.811576276	0.255653118	0.418583204	0.57871336	0.989238884	0.374946824	0.150559556	0.685683099	0.328659617	0.163491443	0.103918492	0.415355429	0.120176821
TCGA-EB-A4IQ	414	0	0.261285854	0.278789685	0.299879388	0.308230713	0.319391099	0.762176321	0.168842767	0.150898071	0.253610518	0.373683021	0.236968662	0.330761422	0.347667067	0.338903999	0.365128492	0.340987745	0.412862324	0.301012113	0.258997928	0.326541837	0.446099844	0.222812125	0.589953606	0.231485752	0.445349075	0.353399912	0.447358955	0.756400099	0.380306007	0.644602183	0.546975033	0.515056001	0.885387938	0.081307857	0.685598086	0.389516893	0.303728279	0.710821418	0.990004224	0.350789364	0.168788816	0.613906763	0.368984553	0.171514115	0.072967769	0.392633852	0.193808329
TCGA-EB-A4OY	593	0	0.312302371	0.14215919	0.365173388	0.333826308	0.290254349	0.783461764	0.181212381	0.177193603	0.287719579	0.348938565	0.260126294	0.592529651	0.302189655	0.389970187	0.344096594	0.440569274	0.250861703	0.346454298	0.269736284	0.262475928	0.426972036	0.209511572	0.310647187	0.356349139	0.352390449	0.608854397	0.541471981	0.680216892	0.510208005	0.939083114	0.381221896	0.434726752	0.731866363	0.041114354	0.749597046	0.271532043	0.341705126	0.674987821	0.987436718	0.687974655	0.149886026	0.669486662	0.383893927	0.324716525	0.139950469	0.487002381	0.367320825
TCGA-EB-A4OZ	620	0	0.422933455	0.305133401	0.518486098	0.30584032	0.503846118	0.537560404	0.248221689	0.273128228	0.329649387	0.339958145	0.457683097	0.589237441	0.456757914	0.459009616	0.580869537	0.553978327	0.447010467	0.461305396	0.429806331	0.392858996	0.531973638	0.311809848	0.497764168	0.428877446	0.659685823	0.542823839	0.510373425	0.411430507	0.609839205	0.927454757	0.55078075	0.671958891	0.92252024	0.085051888	0.68134217	0.494152686	0.487562115	0.591463511	0.98598341	0.540644812	0.249143385	0.366507002	0.494279964	0.371536634	0.190819171	0.520922384	0.327689229
TCGA-EB-A4P0	326	1	0.204809264	0.167359058	0.236005519	0.27284817	0.215983701	0.736763332	0.135063372	0.033924909	0.062669042	0.243394518	0.142080799	0.344306333	0.203119701	0.226305948	0.224687706	0.418338181	0.668731553	0.175627214	0.195007236	0.315587442	0.362034815	0.163468232	0.450441997	0.179312717	0.378926228	0.398450856	0.37847685	0.720073297	0.483076013	0.657922067	0.238555229	0.339480604	0.922290232	0.027904412	0.682498522	0.188451831	0.494622369	0.512201968	0.985644406	0.277553854	0.071330662	0.112330262	0.234317715	0.073167096	0.095714207	0.317523314	0.154576825
TCGA-EB-A551	590	0	0.450553815	0.334604527	0.782997103	0.361486526	0.452990624	0.330996843	0.459121678	0.483529242	0.489900269	0.550751985	0.685707906	0.659875155	0.51222861	0.73453163	0.771742953	0.470318516	0.538972131	0.504759935	0.42576034	0.398656887	0.595339568	0.439443735	0.703077004	0.460409136	0.617546237	0.642152073	0.525165241	0.547086316	0.815112197	0.914805251	0.759114928	0.694833993	0.953544136	0.069435677	0.719002728	0.713395337	0.712537271	0.565319988	0.985425553	0.560620864	0.569235813	0.290440329	0.75376232	0.497766594	0.222305094	0.552495263	0.682544573
TCGA-EB-A553	226	0	0.385342284	0.187786235	0.353915773	0.591505673	0.367261688	0.788995949	0.474440779	0.141176193	0.538543987	0.406985448	0.683630604	0.674011399	0.677434793	0.44917131	0.374682725	0.505900299	0.762234558	0.284635319	0.323377046	0.3376286	0.462283814	0.50761794	0.542232699	0.389468423	0.525142384	0.391889921	0.592141664	0.695156802	0.745415068	0.923846737	0.383048282	0.508676851	0.955207179	0.082510502	0.818308515	0.458190525	0.711092311	0.692909945	0.988098627	0.424839269	0.156769819	0.513065108	0.442398835	0.489998975	0.192520752	0.626820374	0.531067281
TCGA-EB-A57M	399	0	0.333763024	0.113730978	0.175394192	0.22640767	0.254275811	0.821107126	0.150990804	0.119848453	0.150392478	0.228666018	0.178249934	0.29598644	0.398112996	0.392541137	0.289863404	0.417606525	0.466356736	0.21168022	0.277981214	0.370074409	0.765478017	0.193907089	0.431598113	0.235566889	0.315449903	0.445974443	0.446126204	0.721224208	0.639020092	0.481632075	0.407714675	0.739409318	0.920737462	0.04267572	0.696355549	0.21695559	0.368460869	0.751381164	0.990289793	0.265461688	0.170742296	0.609335672	0.374344501	0.120805486	0.111817215	0.316357782	0.232303425
TCGA-EB-A5KH	619	1	0.1764846	0.075163697	0.157636498	0.434620582	0.192514581	0.895584179	0.060093497	0.107652398	0.441183723	0.248942525	0.175331637	0.24879332	0.355051505	0.250220376	0.30739786	0.254489782	0.199926381	0.169696972	0.182535903	0.292723637	0.406918524	0.095643736	0.712001548	0.204624533	0.794967493	0.319815573	0.247171296	0.655253499	0.175861692	0.100245946	0.463016112	0.230540464	0.928377667	0.024857916	0.571484276	0.08859147	0.272451817	0.724458188	0.989238825	0.252431117	0.134256586	0.873456766	0.284954291	0.381732576	0.100975066	0.252023778	0.311958097
TCGA-EB-A5SH	1643	0	0.333876335	0.22074417	0.873879059	0.301358265	0.315420545	0.787305751	0.341432339	0.084848488	0.380317038	0.397351026	0.717535109	0.369382215	0.391819687	0.354314021	0.242603792	0.479464469	0.208956047	0.568152532	0.310508793	0.399072762	0.299997316	0.249881142	0.430067713	0.283808551	0.291110965	0.607464798	0.583454597	0.714506466	0.34932875	0.627895771	0.69843675	0.364524291	0.707855226	0.046458236	0.747686616	0.373004057	0.338230916	0.699298494	0.985305035	0.490916797	0.120905838	0.733373461	0.439954054	0.39645019	0.141007497	0.341472111	0.815439158
TCGA-EB-A5UM	414	0	0.351568168	0.574778265	0.821729648	0.641951438	0.381276485	0.761428529	0.47315358	0.498121119	0.494099911	0.47652906	0.478987551	0.436838476	0.404299171	0.421537284	0.413964114	0.756806125	0.804539438	0.519713171	0.301243447	0.50774328	0.527279235	0.510978519	0.741125146	0.383594849	0.557937344	0.794559405	0.695412676	0.598898099	0.786417433	0.905869878	0.390300918	0.478465812	0.944569292	0.241603502	0.822241797	0.381070149	0.760654157	0.706943491	0.990136436	0.484623856	0.572222532	0.679816048	0.494141247	0.343434349	0.154932289	0.42924525	0.21849638
TCGA-EB-A5VU	321	1	0.160352845	0.185197716	0.198195724	0.115415178	0.253558013	0.727430809	0.226696379	0.279789507	0.074303361	0.148230527	0.218164917	0.190363022	0.262159445	0.308708949	0.270152535	0.240789266	0.257767117	0.136400261	0.186136829	0.262243509	0.361912974	0.164217397	0.331198532	0.129081441	0.298261713	0.482803006	0.241649031	0.744870096	0.299488033	0.201726403	0.242477453	0.368571915	0.914524481	0.063297754	0.525746815	0.175049251	0.755495899	0.704831733	0.987901949	0.249425199	0.256352195	0.169574026	0.25405382	0.063950734	0.097405108	0.397748669	0.208921238
TCGA-EB-A5VV	214	0	0.437937072	0.380625686	0.827651907	0.449650053	0.651865288	0.33888906	0.428139741	0.413592943	0.547145501	0.537880686	0.65027136	0.703063746	0.682920481	0.776464828	0.624949665	0.643966162	0.70979156	0.804196908	0.609401176	0.588324674	0.815817112	0.427734582	0.776885875	0.516309103	0.853252098	0.776199082	0.697342375	0.431574244	0.901678304	0.888688622	0.814747632	0.868827095	0.893614074	0.126474946	0.746414872	0.732400539	0.66527962	0.545358837	0.990562523	0.766169151	0.346797354	0.341748241	0.733551264	0.647827024	0.251653423	0.630974569	0.560322223
TCGA-EB-A6QY	382	0	0.345331751	0.129554097	0.282026193	0.286643236	0.370916167	0.64158444	0.254568264	0.18698729	0.137687281	0.502165191	0.467281624	0.518741758	0.448366801	0.515685694	0.304914807	0.270913662	0.41081733	0.306516326	0.299418319	0.392378388	0.437820416	0.291949622	0.4666431	0.381206193	0.348094928	0.35748475	0.348457486	0.377333748	0.430181863	0.766549077	0.381889343	0.529747439	0.905369917	0.069350633	0.652943718	0.266748124	0.466783657	0.655554559	0.988968242	0.451773988	0.209424623	0.655072089	0.441929004	0.375693657	0.162025299	0.704773763	0.270826379
TCGA-EB-A6QZ	352	1	0.130748044	0.142955945	0.331026294	0.379323712	0.20491516	0.785917082	0.122562191	0.05162682	0.071421642	0.245476724	0.185050414	0.260282533	0.380519125	0.312882572	0.191198457	0.369396808	0.216116444	0.169657746	0.18241091	0.247935392	0.536850654	0.121243447	0.592149642	0.159253918	0.252798444	0.407786964	0.51133877	0.783539455	0.607769368	0.503810432	0.772800966	0.347797963	0.873274977	0.061798016	0.733261427	0.229955758	0.492546663	0.708247106	0.990729058	0.283752936	0.107353518	0.733720721	0.291609254	0.062924188	0.10379339	0.45359435	0.312087651
TCGA-EB-A6R0	467	0	0.345432589	0.210897129	0.529655197	0.364866513	0.360396577	0.138017937	0.139818368	0.241583654	0.174023113	0.344566767	0.664278876	0.343584638	0.421924568	0.634865977	0.378156253	0.485780813	0.822726876	0.313769889	0.423416227	0.413782665	0.440167955	0.249207414	0.428065861	0.408650982	0.555259914	0.495593983	0.708115234	0.454365906	0.511702469	0.51925227	0.460568698	0.473688283	0.931226472	0.058894123	0.758801165	0.299170606	0.829117132	0.364183968	0.991708639	0.436369293	0.248505176	0.070004127	0.462883771	0.496022852	0.178591367	0.419399238	0.2556609
TCGA-EB-A82B	390	0	0.337180682	0.247518673	0.637362243	0.219220765	0.418079481	0.326783133	0.076082288	0.489621292	0.246768308	0.246306305	0.666345494	0.196967837	0.560604341	0.831405875	0.359901868	0.713771897	0.745383502	0.353167115	0.343849881	0.325475271	0.579137118	0.163432272	0.624459969	0.35975634	0.628571708	0.652570922	0.536391717	0.742749382	0.454383227	0.7458761	0.471889085	0.621965669	0.906093823	0.047133893	0.82931417	0.343551034	0.343640637	0.487508544	0.985584072	0.503396351	0.59970564	0.627471501	0.92618754	0.211471794	0.121492259	0.328231487	0.220589134
TCGA-EB-A85I	362	0	0.413318951	0.326755264	0.45891607	0.440346994	0.402621493	0.392293749	0.258229776	0.220652001	0.371021455	0.416912337	0.487791987	0.554493538	0.506103912	0.518355447	0.445019793	0.58189297	0.524034099	0.711074392	0.543839906	0.373722508	0.485031982	0.32975115	0.568493564	0.432098793	0.747573232	0.548568191	0.589212696	0.533692501	0.47941622	0.70543874	0.6984948	0.557093028	0.900004369	0.11632976	0.78912994	0.456233429	0.53968933	0.54866181	0.988977027	0.532953457	0.224691628	0.526010169	0.54824005	0.469185129	0.175722278	0.506329992	0.350279119
TCGA-EB-A85J	360	0	0.429749653	0.310904064	0.526539278	0.381764111	0.375833931	0.69429849	0.254267126	0.241508821	0.339236307	0.403820936	0.453880258	0.486075536	0.417650737	0.509046489	0.360373037	0.576020292	0.440108461	0.433015112	0.39462921	0.381537033	0.521462995	0.311361218	0.422987026	0.471186238	0.521158011	0.485656499	0.611550201	0.559488756	0.502775054	0.911518364	0.510368431	0.612919758	0.892421286	0.077050475	0.775195463	0.420397832	0.451918484	0.585467006	0.989650311	0.573951021	0.218516941	0.582138873	0.536605965	0.477998879	0.178992873	0.448713484	0.308832906
TCGA-EB-A97M	414	0	0.302006956	0.22005676	0.871357044	0.224364311	0.24448826	0.19713684	0.174558199	0.133294498	0.511112661	0.222567205	0.776562392	0.288976173	0.483957126	0.392913536	0.251574699	0.793559633	0.364250229	0.389785369	0.333684364	0.285318004	0.333787742	0.304401713	0.701053065	0.304756897	0.403119874	0.638123402	0.369696859	0.608515889	0.694432649	0.487129226	0.325280869	0.313029445	0.932903664	0.076220691	0.720706309	0.162655119	0.514077927	0.492708872	0.990209453	0.301769899	0.129734475	0.610144308	0.353434643	0.189175341	0.092083542	0.529008983	0.516267269
TCGA-EE-A17X	907	1	0.190539533	0.190099685	0.230887492	0.492825559	0.213850474	0.685372421	0.125484067	0.0402681	0.124032375	0.251595885	0.113703268	0.110049461	0.834820118	0.270035714	0.185065283	0.406873015	0.167724776	0.166311389	0.207148028	0.18968066	0.246259454	0.12091988	0.389031967	0.165691291	0.675178556	0.686926768	0.472655441	0.762008714	0.306571872	0.18436693	0.146031085	0.249281988	0.941140142	0.039677367	0.782435514	0.244165489	0.213458763	0.633316514	0.990350412	0.258739856	0.073329099	0.824727502	0.221643721	0.085185738	0.09684022	0.184953996	0.083774586
TCGA-EE-A17Y	828	1	0.155732308	0.143056347	0.476035288	0.153417494	0.31285826	0.737892889	0.228126892	0.109171575	0.075598798	0.210941351	0.112723587	0.142422448	0.366884045	0.468184342	0.470688028	0.342820257	0.281548238	0.284602042	0.208260676	0.253969253	0.568333343	0.170199858	0.594784442	0.227437368	0.431040798	0.398157736	0.338987743	0.761895174	0.820338306	0.715290864	0.233514399	0.470365615	0.943858439	0.043492561	0.712015961	0.422136249	0.330178809	0.755575879	0.986457494	0.416654348	0.112909717	0.221145281	0.459878743	0.032418634	0.083330573	0.160781791	0.092040194
TCGA-EE-A17Z	263	1	0.120678756	0.073836761	0.22726007	0.136628935	0.168651512	0.845683262	0.04778301	0.041461624	0.108488746	0.230716243	0.073452882	0.074116436	0.190245523	0.147927473	0.119804147	0.232073666	0.677112527	0.072037392	0.104539649	0.351459127	0.257884493	0.109542194	0.124961734	0.051970147	0.084468822	0.199746173	0.431489536	0.736023362	0.214358172	0.51458537	0.114039397	0.148208047	0.879657635	0.054035032	0.44077681	0.065041959	0.1557529	0.694999231	0.341231018	0.475317701	0.066281604	0.833502593	0.140747147	0.040180827	0.060370648	0.132943245	0.055502738
TCGA-EE-A180	2889	1	0.100702677	0.114288929	0.190135691	0.289694857	0.124324277	0.249997233	0.905803889	0.04105873	0.113998516	0.157344348	0.075875342	0.427267918	0.493309677	0.103485699	0.154501095	0.371105149	0.800854249	0.116365823	0.12309221	0.137818576	0.311491458	0.75889899	0.69857943	0.138837996	0.278222452	0.688586367	0.368313929	0.768745612	0.285306794	0.889373547	0.171504226	0.229118594	0.866211248	0.061348625	0.644243583	0.056264602	0.207683758	0.443704273	0.984252574	0.163651864	0.051788194	0.805386898	0.152933965	0.082644648	0.064782432	0.401440548	0.718122194
TCGA-EE-A181	1026	1	0.38182853	0.275906185	0.474997227	0.332938326	0.386626174	0.318447632	0.193659524	0.272202721	0.322578092	0.331911031	0.417835421	0.429528658	0.381046323	0.546212762	0.407303819	0.497532998	0.730909604	0.410102025	0.366049346	0.381891429	0.685616561	0.273592	0.693333553	0.433366817	0.452911846	0.465776031	0.475409617	0.581529905	0.75824215	0.673968391	0.62506164	0.596089945	0.826286649	0.082651497	0.749669879	0.393642717	0.489703085	0.463269323	0.98867751	0.470922816	0.280943703	0.083976506	0.475995212	0.415007759	0.197398517	0.409790632	0.615483952
TCGA-EE-A182	447	1	0.356010171	0.167075583	0.503234646	0.248555482	0.339357495	0.545243375	0.124035719	0.139700777	0.266531651	0.346372205	0.539968524	0.396886168	0.506189775	0.361556877	0.447832237	0.346755324	0.322394208	0.485811625	0.332159708	0.273706307	0.373962349	0.192578611	0.732097836	0.305872301	0.390015129	0.696364439	0.365209409	0.717363178	0.377052169	0.786131697	0.370520075	0.441323454	0.766307422	0.043780599	0.780980937	0.433167408	0.628344523	0.537343894	0.982836441	0.412506918	0.172232179	0.632992931	0.346621263	0.217271658	0.188105909	0.319977014	0.268042345
TCGA-EE-A184	2073	1	0.26164888	0.136427502	0.267175626	0.200710956	0.275472546	0.805102594	0.159914243	0.108709751	0.120544756	0.341159428	0.240334193	0.177254969	0.902705036	0.369985558	0.271734339	0.379939341	0.478913066	0.253834546	0.37440029	0.289441166	0.457159277	0.226659226	0.305086194	0.299674372	0.200996929	0.459506788	0.529635442	0.689740927	0.3731714	0.279106361	0.336442623	0.415280093	0.926229554	0.062004693	0.794011111	0.222134794	0.352054727	0.678569727	0.991889815	0.360274412	0.132430118	0.478222169	0.315799411	0.184515835	0.163381879	0.354688762	0.141847042
TCGA-EE-A185	151	1	0.066157551	0.087712247	0.173432705	0.096565414	0.144018236	0.894614358	0.062882572	0.029331684	0.070373752	0.10123821	0.053770529	0.111687076	0.21787884	0.09557082	0.183652778	0.165248207	0.510908123	0.137268292	0.159799044	0.13068994	0.274323259	0.144949993	0.213536021	0.030657461	0.173546494	0.210711311	0.243375317	0.740184357	0.244624027	0.643044907	0.085342164	0.215527278	0.903514042	0.029371536	0.780771353	0.128981009	0.189309167	0.81483566	0.992446344	0.191446128	0.071983591	0.835906129	0.148219297	0.0307046	0.049114238	0.210073279	0.119949715
TCGA-EE-A20B	4070	0	0.558563132	0.20442907	0.474238291	0.27836199	0.41948216	0.590845111	0.131604207	0.560403438	0.18083625	0.257806212	0.414594828	0.290024641	0.393616365	0.413488071	0.393328453	0.671744932	0.784714747	0.338563246	0.361055463	0.349162627	0.856432758	0.236501481	0.370695115	0.363566857	0.527730458	0.53768297	0.4823996	0.650242117	0.843623525	0.945365693	0.417424189	0.933543974	0.88275604	0.058540547	0.766696351	0.376267809	0.453163694	0.784683032	0.990564622	0.429465661	0.515708291	0.344241201	0.339616447	0.339883252	0.237742474	0.320796494	0.213859609
TCGA-EE-A20F	2785	0	0.379703491	0.201132179	0.414414214	0.429585897	0.344566447	0.249938954	0.153187347	0.183500267	0.236748592	0.306869814	0.459852907	0.481082957	0.391012367	0.454011898	0.488934747	0.336342637	0.708823689	0.361233989	0.385567448	0.322142945	0.433211636	0.233063811	0.642159922	0.373440803	0.563188793	0.431461958	0.397772143	0.603175745	0.511874506	0.936433255	0.501493084	0.457020672	0.914733872	0.053279293	0.693273803	0.361651824	0.736502707	0.539981445	0.989828128	0.43818722	0.175800199	0.356079484	0.384703252	0.283722	0.19126696	0.411163764	0.346362252
TCGA-EE-A20H	5118	1	0.125301902	0.193763862	0.557773229	0.368023565	0.206915384	0.388724773	0.328782168	0.554309966	0.074261372	0.31441409	0.66220841	0.141517507	0.442215007	0.216613924	0.382474455	0.495562863	0.490580976	0.145191474	0.113980559	0.219614902	0.702060392	0.362256363	0.435159181	0.196021347	0.467175391	0.442892947	0.298502115	0.679485275	0.706392452	0.866406782	0.198228095	0.607125514	0.921675711	0.041769706	0.520122247	0.195131808	0.550492349	0.620162149	0.964689452	0.155664535	0.615085905	0.536463004	0.169890764	0.068000788	0.094243196	0.219970035	0.09621296
TCGA-EE-A29A	1927	1	0.166251485	0.429112403	0.829467626	0.729051002	0.472095948	0.877182573	0.712743922	0.728860469	0.231590275	0.750742334	0.722398605	0.932718522	0.778067539	0.255660188	0.885770539	0.792881217	0.765943342	0.720003734	0.349756252	0.757082046	0.819142243	0.748865723	0.753175144	0.088374309	0.930757691	0.865639701	0.547305211	0.821875423	0.855269378	0.95639768	0.820791392	0.884802645	0.950336141	0.225456791	0.816341319	0.542667201	0.822660598	0.839595688	0.990936281	0.177142302	0.780365615	0.845963313	0.14412754	0.685583185	0.094313231	0.857992032	0.66414177
TCGA-EE-A29B	2588	1	0.06659655	0.215273419	0.477431888	0.805937602	0.689152513	0.899111211	0.121536673	0.078523631	0.256205512	0.448733789	0.530743605	0.912167478	0.482730166	0.142659342	0.370761263	0.735740061	0.845891993	0.497824302	0.238051247	0.250121832	0.506842975	0.357014035	0.745913398	0.091614283	0.828786486	0.510109492	0.66900753	0.818019224	0.84514013	0.95898784	0.542096657	0.239493765	0.956595189	0.111480583	0.844679662	0.121905597	0.624481378	0.804183104	0.990922563	0.236466163	0.106640519	0.887239545	0.132851576	0.186054782	0.073527761	0.900663215	0.647779494
TCGA-EE-A29C	2402	1	0.323512652	0.223821696	0.484724136	0.235724586	0.409354021	0.781614936	0.163241321	0.157758844	0.177167723	0.226088607	0.27719825	0.269337586	0.388071967	0.445139417	0.449342406	0.286277553	0.317244957	0.329725006	0.371997655	0.3800358	0.46489636	0.239609873	0.706620643	0.344640505	0.454833423	0.342348269	0.384637871	0.671189222	0.709913049	0.945920553	0.318164799	0.471165485	0.928667828	0.062186164	0.758538724	0.336805811	0.640465558	0.751675357	0.987445049	0.406549748	0.124566174	0.639920424	0.390571688	0.247806962	0.186145079	0.332097648	0.231306029
TCGA-EE-A29D	425	1	0.099210568	0.081230869	0.572039167	0.528851216	0.156246312	0.239419287	0.078464108	0.052172571	0.309835	0.243670817	0.847150587	0.143841787	0.440057189	0.12186279	0.607124595	0.324352657	0.110985482	0.372867324	0.161265078	0.137593466	0.191940135	0.070973622	0.697404863	0.044128046	0.552442461	0.554598994	0.493267141	0.805681046	0.250855711	0.775889398	0.23110853	0.135888042	0.948666204	0.054247286	0.702382181	0.159326042	0.180594051	0.59880863	0.986789374	0.120457298	0.075275935	0.734222752	0.095253946	0.049635104	0.074275907	0.257529246	0.159531493
TCGA-EE-A29E	1940	0	0.239887694	0.095671654	0.281906272	0.406618571	0.240805358	0.870183762	0.078669293	0.048616932	0.069410305	0.131125767	0.129983641	0.084538149	0.270765602	0.193760841	0.224844442	0.338407846	0.253673146	0.201955212	0.254351079	0.224073572	0.322961996	0.057900601	0.251179662	0.12906112	0.281010946	0.611886793	0.724890489	0.688376148	0.617272204	0.94807807	0.19427479	0.290390004	0.906509763	0.033425606	0.849860953	0.219274813	0.234799956	0.689203578	0.989318328	0.311719224	0.084232192	0.531935962	0.137683967	0.033275808	0.081080028	0.173373505	0.049386962
TCGA-EE-A29G	2192	1	0.516577453	0.176608455	0.566515697	0.350616421	0.477788281	0.474622149	0.33761966	0.585030929	0.284580946	0.260599724	0.512147561	0.577927087	0.428591048	0.300037167	0.602253282	0.542513241	0.584250842	0.41105142	0.339582343	0.304365651	0.537270636	0.382930455	0.54612053	0.275529409	0.505732714	0.635243197	0.531381523	0.526062133	0.670840351	0.916632514	0.570267801	0.590676237	0.931544217	0.072364336	0.506285658	0.259123028	0.40113627	0.696774527	0.986190191	0.357493328	0.640606217	0.350741802	0.300742188	0.210608851	0.184862808	0.477971699	0.4810043
TCGA-EE-A29H	1966	0	0.255498622	0.240684824	0.832221734	0.404069874	0.399406393	0.30178718	0.097231178	0.322545893	0.336316184	0.259566166	0.576269017	0.223583691	0.582162953	0.61384909	0.385208769	0.431334345	0.737317449	0.410301753	0.316372816	0.415755755	0.40893802	0.246516302	0.516186832	0.296116211	0.894706363	0.496731093	0.462220847	0.424012535	0.322274982	0.50367803	0.480971968	0.482127314	0.828493398	0.088742698	0.706003162	0.238351079	0.582015047	0.640620696	0.981911529	0.35426	0.39921462	0.69569338	0.740403801	0.384940048	0.167273158	0.33053744	0.513420215
TCGA-EE-A29L	79	1	0.219413133	0.631658141	0.582639023	0.812636702	0.165472079	0.886991309	0.752406532	0.079421191	0.233119223	0.188995185	0.871584079	0.700343917	0.39561716	0.135931191	0.161632288	0.380407844	0.13222228	0.165364094	0.150768163	0.308842236	0.398817187	0.848117594	0.620008665	0.155012837	0.45224048	0.554195719	0.492368543	0.456579107	0.201501781	0.102211958	0.466586312	0.188241259	0.861007303	0.145484887	0.865102601	0.200299747	0.430479431	0.52055186	0.986768305	0.155548767	0.081412416	0.831151111	0.113263368	0.558455107	0.082604606	0.680840969	0.90567725
TCGA-EE-A29M	1729	0	0.48017834	0.203881659	0.558485078	0.319875557	0.394488822	0.476709356	0.201500995	0.290444411	0.414267562	0.291181685	0.408665238	0.41719058	0.4368011	0.471655751	0.451219453	0.407100931	0.498797514	0.404299152	0.355650476	0.376521462	0.597615917	0.353625754	0.411189225	0.431663022	0.390822108	0.408027325	0.537607065	0.386385044	0.441954896	0.811441295	0.468972917	0.640706099	0.952255858	0.0726818	0.470654358	0.440281794	0.473765597	0.58726951	0.989126067	0.562449367	0.219348585	0.628122596	0.494313892	0.446818973	0.211312696	0.406336775	0.327671825
TCGA-EE-A29P	1716	0	0.576842597	0.623934564	0.889353544	0.665839415	0.518376636	0.631418931	0.614256963	0.514927277	0.842474659	0.482328556	0.802146294	0.815382433	0.847725583	0.850182265	0.627708357	0.699232278	0.805891143	0.581923792	0.471244063	0.675253824	0.899981799	0.718221386	0.77608978	0.447532129	0.909697326	0.772060315	0.798550745	0.528742595	0.91122722	0.942261674	0.824529042	0.935595782	0.9484105	0.125136291	0.860582818	0.707800394	0.77290736	0.635031822	0.990319838	0.73667456	0.562044429	0.088139469	0.801225508	0.594997331	0.238946646	0.728261242	0.812255188
TCGA-EE-A29Q	2030	1	0.191208551	0.180152388	0.377428482	0.288192854	0.283725068	0.434342946	0.183970897	0.225999518	0.122989707	0.187370033	0.116352524	0.421621432	0.36733514	0.301280217	0.316345588	0.425917714	0.210821614	0.208972904	0.214679863	0.25742088	0.368763459	0.301086541	0.486142759	0.21809994	0.416081408	0.482753968	0.462334901	0.634373391	0.454227207	0.928983992	0.508518818	0.351860364	0.941592926	0.055336053	0.69383719	0.23538895	0.394298889	0.582655483	0.992044533	0.308256327	0.275240747	0.679454926	0.280080639	0.161277677	0.112348127	0.410713948	0.117838266
TCGA-EE-A29R	440	0	0.117553109	0.080676325	0.304175556	0.162554216	0.167210469	0.658891006	0.125055394	0.332396369	0.131372677	0.137334394	0.526842481	0.132943094	0.239621183	0.293560514	0.208727531	0.388332473	0.358551466	0.140672271	0.107097307	0.216803741	0.335474461	0.136277885	0.194841284	0.101688267	0.268948774	0.339658197	0.283592254	0.681813894	0.80542097	0.922212406	0.234925291	0.212342254	0.893185938	0.026446099	0.622861786	0.129108754	0.611141517	0.829220282	0.989852381	0.183979738	0.265622982	0.424196467	0.223033463	0.087627236	0.074426287	0.227852723	0.09750025
TCGA-EE-A29S	1864	1	0.697164668	0.184530219	0.821969163	0.518556587	0.34439202	0.649837039	0.360611706	0.386398729	0.795763096	0.297031913	0.717081883	0.529812024	0.47274169	0.491015055	0.530998484	0.418831858	0.720848226	0.467316978	0.348458304	0.424880158	0.823166305	0.411676493	0.698487134	0.403767287	0.692455876	0.677933632	0.559092663	0.299414848	0.776083338	0.639510889	0.803994875	0.866080911	0.9485466	0.080615238	0.76620626	0.383201677	0.429048688	0.645134604	0.985370621	0.45673462	0.505844952	0.644341703	0.597214284	0.698259017	0.192975363	0.491576204	0.585777378
TCGA-EE-A29V	787	1	0.253621875	0.264926576	0.374740261	0.187245899	0.405681456	0.878624555	0.109188683	0.072965002	0.113337973	0.174486824	0.674557878	0.178899311	0.412388964	0.349690864	0.279799061	0.276089963	0.792665735	0.40575363	0.259127841	0.37265048	0.485214927	0.158645176	0.443299785	0.186883747	0.327678815	0.351200788	0.349342317	0.747727104	0.388328983	0.442838714	0.27159291	0.453305953	0.954736982	0.033609288	0.756091323	0.36771552	0.439112074	0.763751777	0.988776475	0.398125542	0.090787218	0.608657836	0.265981944	0.103232787	0.133853778	0.250360431	0.171171242
TCGA-EE-A29X	545	1	0.339136599	0.375379458	0.368346651	0.342377135	0.449670284	0.790341383	0.137668126	0.396522931	0.196026669	0.301078282	0.478002784	0.241791128	0.709661858	0.440203869	0.34932885	0.519298689	0.582328063	0.415840015	0.334574695	0.389993608	0.593396317	0.236281747	0.381605344	0.405066265	0.767913594	0.706982795	0.592597617	0.590208501	0.499597899	0.936911831	0.435458064	0.511953012	0.854329549	0.194971435	0.808210986	0.291868855	0.612476607	0.679868243	0.991818404	0.435795941	0.363238151	0.644636603	0.462988062	0.41540813	0.175989688	0.364388749	0.427775427
TCGA-EE-A2A0	1424	1	0.371382784	0.304728573	0.755166408	0.369028394	0.493349478	0.540391164	0.177579735	0.294035447	0.543382135	0.42075088	0.590508893	0.477632007	0.634233106	0.548551868	0.506564067	0.544644025	0.410270338	0.537591401	0.403978137	0.406824683	0.510851811	0.294968659	0.482710594	0.415538113	0.709972225	0.603958402	0.531108089	0.607380969	0.584973216	0.946488532	0.486868135	0.559300216	0.934512152	0.079959361	0.786556096	0.501886283	0.523265593	0.688188329	0.980386389	0.473694681	0.278539214	0.526020335	0.505793874	0.391744923	0.202170961	0.447536696	0.386870402
TCGA-EE-A2A1	3130	0	0.416535593	0.354574843	0.584231233	0.30865051	0.484784126	0.520753792	0.2509957	0.210467738	0.260990338	0.366792797	0.441130067	0.481408061	0.49656664	0.617972316	0.514054711	0.511161543	0.455459743	0.441395566	0.446368716	0.455099471	0.656466694	0.308449856	0.511466358	0.419329775	0.598397066	0.556728147	0.520800209	0.609525588	0.697962829	0.822899439	0.503411207	0.686751002	0.939709365	0.085372683	0.596294628	0.53236614	0.609936774	0.66768766	0.988689129	0.560256639	0.18761603	0.542553974	0.530697569	0.465203684	0.205833575	0.47864543	0.333754453
TCGA-EE-A2A2	1120	0	0.295065472	0.156898739	0.730176473	0.377946966	0.351746671	0.513475796	0.15780434	0.139669764	0.839640861	0.449940407	0.774491322	0.33902943	0.540260142	0.365900363	0.269110535	0.28872269	0.350542937	0.272174068	0.252930529	0.34011223	0.418536732	0.3040602	0.71043546	0.308615144	0.484246723	0.461682709	0.503909765	0.4049983	0.518567367	0.786054422	0.488431631	0.480161415	0.96418834	0.053354946	0.743252489	0.230943107	0.700674978	0.618445364	0.975722056	0.338562718	0.164220524	0.467759088	0.408404945	0.185626825	0.142777977	0.280679579	0.170493787
TCGA-EE-A2A5	1195	1	0.186871958	0.092743111	0.515670418	0.125441784	0.253043067	0.888979964	0.114993974	0.180742906	0.145572625	0.186103275	0.752411404	0.170199838	0.233939479	0.265344188	0.270634857	0.313144823	0.169962044	0.145968714	0.169491264	0.361612084	0.36975349	0.158793459	0.268209987	0.159133648	0.196893167	0.431386909	0.337029043	0.769980897	0.58933787	0.524926785	0.42095537	0.296355052	0.926545854	0.043608746	0.528865268	0.200690094	0.399046585	0.772393843	0.952733218	0.268079458	0.138146099	0.807596857	0.217981225	0.102148246	0.120524358	0.212097833	0.200900793
TCGA-EE-A2A6	2620	0	0.409974905	0.331475822	0.809957146	0.516968923	0.43489825	0.556191549	0.401946491	0.20322182	0.244507714	0.519502266	0.697389469	0.701007408	0.417718326	0.64450766	0.456209757	0.597952138	0.404135676	0.456128155	0.438670176	0.473578161	0.708642015	0.407174641	0.742674165	0.396499267	0.922828422	0.663574114	0.627495151	0.392138751	0.47105242	0.591745386	0.459173194	0.526163451	0.946769978	0.058081361	0.861827269	0.460201601	0.471203931	0.634793407	0.991904595	0.481670592	0.1463198	0.568042551	0.55158389	0.447194631	0.153076972	0.716912421	0.75862127
TCGA-EE-A2GB	1803	0	0.244245065	0.124999836	0.223583214	0.130903238	0.231709795	0.409576228	0.101068652	0.093526523	0.105115633	0.193796882	0.172288401	0.136879139	0.274687364	0.256121056	0.264812088	0.228731417	0.376105006	0.217668252	0.202747523	0.23956407	0.318666396	0.204518527	0.280673276	0.266038327	0.159165852	0.246838109	0.25746603	0.730749057	0.39075509	0.932392216	0.269960431	0.334303959	0.84100997	0.054435891	0.80465017	0.146794783	0.268436622	0.642566915	0.978963353	0.301470058	0.096610103	0.294253792	0.249127915	0.154313937	0.111278737	0.218797191	0.127526933
TCGA-EE-A2GC	2051	0	0.374469061	0.256431752	0.448162508	0.63279474	0.307307418	0.303379293	0.562812699	0.528602565	0.38728475	0.494734817	0.733100473	0.858280558	0.442574706	0.500346388	0.390161441	0.733732025	0.799036725	0.333744275	0.341450462	0.299952755	0.539143505	0.667096062	0.565266303	0.387394327	0.662365467	0.665623522	0.671257441	0.66987771	0.576466557	0.924716316	0.648220539	0.504130466	0.945644129	0.076976733	0.820308357	0.350253732	0.454034627	0.433231942	0.990257826	0.451011679	0.550928383	0.368072061	0.416600868	0.437819414	0.147061798	0.718170339	0.485807667
TCGA-EE-A2GD	10346	1	0.454600077	0.347406553	0.78687741	0.511231237	0.660675273	0.494648771	0.277011708	0.455090997	0.314192779	0.520285967	0.526546008	0.59758462	0.667310795	0.733786125	0.741643215	0.713039451	0.597597512	0.717014094	0.589273856	0.367220804	0.645672185	0.316205512	0.750185338	0.387134986	0.857216127	0.710560818	0.71146104	0.691696239	0.741759363	0.942829843	0.611189481	0.652477521	0.939688396	0.172730323	0.835139255	0.651411915	0.711431114	0.679958954	0.990012919	0.717099046	0.548194045	0.193988593	0.677293118	0.627071071	0.375270688	0.652934345	0.4177592
TCGA-EE-A2GE	4898	0	0.446220468	0.382276054	0.718328207	0.384817635	0.491956076	0.380712847	0.350976189	0.293636712	0.373644731	0.412049992	0.535337638	0.562017526	0.469540208	0.544335313	0.507871509	0.546851001	0.667605493	0.473833016	0.424539298	0.445297553	0.805758292	0.380076992	0.564803027	0.459049854	0.653893498	0.499117472	0.504828433	0.474117532	0.835978197	0.934754482	0.506177374	0.832133767	0.955923567	0.091805867	0.752877395	0.532135142	0.665406243	0.633904766	0.989184134	0.501716412	0.248346549	0.193951844	0.546005312	0.442742754	0.221284933	0.526947219	0.472615697
TCGA-EE-A2GH	6328	0	0.438964457	0.379007482	0.688597666	0.394491462	0.448596524	0.525737733	0.34473392	0.293217597	0.452685237	0.389948029	0.518540217	0.737719626	0.47733238	0.597710911	0.536931574	0.512407516	0.516445394	0.509186608	0.469307176	0.429401114	0.560532511	0.469520196	0.469944931	0.460424396	0.697837795	0.642990637	0.54998469	0.435735278	0.759964735	0.940796821	0.606578848	0.62664042	0.922880308	0.087349406	0.757451312	0.627499515	0.530357205	0.580038067	0.988699702	0.524565164	0.272012587	0.460409404	0.576010791	0.460657838	0.195371876	0.582400953	0.442724469
TCGA-EE-A2GI	1482	0	0.310759502	0.250723352	0.448597529	0.366982276	0.389982788	0.182356049	0.210168537	0.233682727	0.304704444	0.333677145	0.749881875	0.477390592	0.82092055	0.563327133	0.381496749	0.375358002	0.712235981	0.403708312	0.35837454	0.361513524	0.502241041	0.340427025	0.382123461	0.383162744	0.446529605	0.481705735	0.412590403	0.555684892	0.548404155	0.676966728	0.511742608	0.544737902	0.921416279	0.077480135	0.665476524	0.33022468	0.517708546	0.43811934	0.989712059	0.458422628	0.211014131	0.155838454	0.440103381	0.394383135	0.214277561	0.442805431	0.209855201
TCGA-EE-A2GJ	2270	0	0.539688125	0.242711809	0.825288803	0.507000058	0.360017884	0.774748004	0.594814455	0.205822563	0.75890035	0.314709546	0.63232726	0.759155578	0.793292213	0.412718416	0.577283301	0.317436632	0.748461919	0.45509749	0.352670642	0.360821906	0.425535985	0.389678796	0.754459347	0.388619075	0.784488317	0.582290584	0.49978135	0.636908698	0.755795914	0.683519288	0.738469424	0.502669284	0.938305297	0.131792138	0.680304746	0.365243549	0.441023961	0.606925252	0.986152445	0.427172025	0.173769461	0.637708221	0.463734662	0.747984884	0.183542651	0.635326652	0.766296622
TCGA-EE-A2GK	1665	0	0.483205021	0.463883706	0.867782518	0.467993126	0.636232642	0.421339628	0.299563702	0.352755539	0.568430059	0.489424658	0.525513345	0.695434764	0.749170312	0.713762184	0.69724372	0.67417796	0.717646774	0.716205675	0.632296106	0.48887463	0.838230679	0.382454714	0.749071478	0.493095739	0.870163328	0.793902058	0.77248304	0.453567456	0.84654514	0.939102617	0.786610015	0.898314125	0.929831835	0.121697648	0.806456372	0.723172018	0.558678724	0.63404359	0.987445659	0.824356954	0.283426592	0.136900207	0.709667905	0.545431961	0.24756306	0.570143467	0.570922514
TCGA-EE-A2GL	2423	0	0.44060996	0.377967343	0.840109336	0.521757216	0.669314944	0.500633166	0.29030763	0.507069172	0.718481084	0.387421185	0.580070409	0.617398147	0.804248715	0.818892473	0.748485014	0.68530202	0.816854269	0.760039782	0.605839979	0.435510223	0.772661469	0.368046996	0.642728408	0.439548489	0.856411843	0.704588474	0.716425195	0.539932316	0.813075422	0.949025421	0.748730289	0.747222526	0.871688833	0.081071632	0.809896417	0.802198668	0.521585222	0.66265637	0.988576624	0.569888566	0.462345621	0.449540055	0.813743139	0.490636537	0.222166254	0.418922413	0.451570053
TCGA-EE-A2GM	2296	0	0.229557628	0.25612357	0.736926233	0.548990291	0.429269729	0.817233265	0.460604075	0.270678181	0.391105398	0.335204933	0.247843806	0.273730895	0.317430598	0.203010546	0.229998571	0.406997105	0.210886015	0.365190519	0.192195916	0.496446379	0.305744337	0.458802374	0.381400626	0.207459827	0.46692701	0.509369579	0.518985503	0.773594929	0.487464605	0.233921753	0.216898637	0.291577329	0.948006352	0.065724129	0.714529893	0.214574119	0.492291151	0.695466798	0.974719054	0.258786284	0.264958086	0.791275423	0.215409114	0.100514267	0.125746647	0.329596043	0.202352545
TCGA-EE-A2GN	3106	1	0.189942887	0.111207723	0.403709297	0.23409837	0.284689272	0.762321483	0.120899304	0.041633878	0.153078108	0.179459944	0.769700782	0.14335826	0.341137396	0.227562021	0.214034524	0.379402429	0.459543015	0.213863895	0.167851039	0.381407117	0.32427144	0.138801236	0.256732816	0.174962298	0.181728552	0.32248219	0.464889331	0.791190106	0.581825114	0.718997487	0.230894061	0.275981833	0.871778702	0.045701409	0.295123418	0.316403973	0.47135241	0.770670396	0.972012579	0.43380774	0.080985235	0.803023889	0.196956763	0.094349016	0.092504592	0.20654552	0.103551087
TCGA-EE-A2GO	3857	0	0.08108527	0.320743265	0.292758016	0.460078312	0.191545148	0.879625826	0.622892167	0.297567205	0.143712117	0.229023366	0.082012383	0.745710212	0.822089482	0.164519104	0.928910527	0.734671417	0.119219582	0.260637478	0.179903968	0.148238454	0.903695729	0.634436946	0.656233612	0.078488937	0.896881193	0.509019662	0.336890782	0.812738697	0.824081661	0.873855776	0.220425906	0.964831042	0.852814841	0.064264388	0.656923492	0.124089052	0.780439982	0.836808097	0.990147039	0.128758876	0.362363674	0.842020637	0.141879512	0.043113554	0.097234822	0.542526487	0.096825585
TCGA-EE-A2GP	423	1	0.348662637	0.156503938	0.334514811	0.251735946	0.368675164	0.69434796	0.208487908	0.144313154	0.080813096	0.198080298	0.322477633	0.199556801	0.609937371	0.32923359	0.356471004	0.575689345	0.671395252	0.309046392	0.340826732	0.281096311	0.432654607	0.274301285	0.494324543	0.34874221	0.656275874	0.63388337	0.59048587	0.72163804	0.696275644	0.93969284	0.417691972	0.469144997	0.823711222	0.048319944	0.729746815	0.315648836	0.354153078	0.754457462	0.989945511	0.364633573	0.138610451	0.230039667	0.3297741	0.134271677	0.125130241	0.214438886	0.144595181
TCGA-EE-A2GR	1301	1	0.08373868	0.066167271	0.112990391	0.507332042	0.105095931	0.925001855	0.156575929	0.074505238	0.056250366	0.314137292	0.358710933	0.599686278	0.207375963	0.094692256	0.103572516	0.600306694	0.073724323	0.077773496	0.094311375	0.285986812	0.498283711	0.117608853	0.112910762	0.05043149	0.690153856	0.433915264	0.457700841	0.836828008	0.197693093	0.751978665	0.13069438	0.519050255	0.94099693	0.070155498	0.725825147	0.057139771	0.174089987	0.679243111	0.988402952	0.05612701	0.070359864	0.815882132	0.088569116	0.1301717	0.049432609	0.598309764	0.077347895
TCGA-EE-A2GS	2470	1	0.175610207	0.13423099	0.595949921	0.201649659	0.413293153	0.719124293	0.186081009	0.109408585	0.139439756	0.198292301	0.266796289	0.192650181	0.248372542	0.25058061	0.23123761	0.507610391	0.60304359	0.180170304	0.213560529	0.420696231	0.488584538	0.138497228	0.224075185	0.230067207	0.332858845	0.383997752	0.521527843	0.771248102	0.76555205	0.923806086	0.259979502	0.254777873	0.877463022	0.04150899	0.710931247	0.671330617	0.53535301	0.831495307	0.987877822	0.226348048	0.110981094	0.21388433	0.174833319	0.105549615	0.122720874	0.246455763	0.140994241
TCGA-EE-A2GT	1365	0	0.485127665	0.347371163	0.721080633	0.323962128	0.478821073	0.696668051	0.268500666	0.334810585	0.390823427	0.398811251	0.480086843	0.695251035	0.470972616	0.562143632	0.494801936	0.499076006	0.475541064	0.520772115	0.466978137	0.464766718	0.677298961	0.415027163	0.485187375	0.439992123	0.54789303	0.59814067	0.689086045	0.547726361	0.789533421	0.962246214	0.536235942	0.690275214	0.875042158	0.086641317	0.832457407	0.558019242	0.551619028	0.750926537	0.989440587	0.555113178	0.278074379	0.582198747	0.494102767	0.499437627	0.252369359	0.503893787	0.443091999
TCGA-EE-A2GU	2884	0	0.659120272	0.336106988	0.887063164	0.644451524	0.742630075	0.669601537	0.609111416	0.5346789	0.438633154	0.373182067	0.75274804	0.400783603	0.872566974	0.474502349	0.302329006	0.735490261	0.862524842	0.647260975	0.401483845	0.633434982	0.889952188	0.617076609	0.749942016	0.466883281	0.907502836	0.87405813	0.75701548	0.493438434	0.886205591	0.957743022	0.934612919	0.981253277	0.911803552	0.105951167	0.853094057	0.818064062	0.786784984	0.648881115	0.99051999	0.907742648	0.53821199	0.242232754	0.522226487	0.463637655	0.18910358	0.463975795	0.78793092
TCGA-EE-A2M5	659	1	0.290215406	0.157081381	0.458517014	0.195860925	0.353915059	0.409399456	0.116797202	0.121256035	0.258353668	0.271972519	0.254140727	0.310012979	0.359280838	0.377756713	0.466832933	0.564166982	0.342134481	0.349977175	0.331998164	0.301419557	0.440455705	0.225834831	0.360972098	0.355031505	0.69104064	0.673383421	0.385422249	0.645548799	0.725671763	0.886071186	0.438762553	0.508092904	0.571130852	0.067773428	0.76748583	0.471854135	0.535518772	0.545044443	0.980349689	0.465333494	0.143950378	0.539683408	0.431109574	0.235619044	0.140326614	0.295048443	0.192204704
TCGA-EE-A2M6	3932	0	0.142882167	0.139982346	0.697971128	0.570434055	0.165815973	0.8938319	0.428511745	0.105363498	0.362017071	0.354296184	0.859603789	0.527148073	0.90976661	0.243128882	0.246922319	0.427593488	0.170325447	0.168202218	0.142610853	0.293449937	0.512649579	0.349574635	0.673902188	0.14418785	0.857424344	0.332629761	0.246990313	0.811713074	0.85507086	0.182003831	0.211947267	0.292727235	0.961978015	0.04848383	0.711042049	0.227946953	0.577237061	0.807120877	0.971521603	0.22814648	0.105566554	0.830655728	0.185077023	0.227219095	0.063943034	0.549953496	0.768722132
TCGA-EE-A2M7	877	1	0.455699875	0.286648341	0.540248289	0.347393302	0.421540177	0.629857744	0.230694338	0.536244448	0.327711026	0.344924196	0.441597505	0.456623877	0.475188	0.531322292	0.388808136	0.608474579	0.553668215	0.388566177	0.388647363	0.378070425	0.865604896	0.310818739	0.482362772	0.387190603	0.679170269	0.694088877	0.64849328	0.659276647	0.856303198	0.949211175	0.524969065	0.89898507	0.929725845	0.088071654	0.731258342	0.530902555	0.49985393	0.72360975	0.987098093	0.462640842	0.400279268	0.339719436	0.493309765	0.428204275	0.230143118	0.423979778	0.294528689
TCGA-EE-A2M8	601	1	0.514747135	0.477246498	0.621164237	0.456009617	0.56411342	0.396387237	0.381375695	0.332562476	0.440454863	0.482822358	0.597960996	0.6982384	0.557116763	0.591420796	0.569906006	0.675729672	0.524908565	0.596358762	0.527749079	0.490903137	0.791094801	0.435515072	0.598583836	0.472838344	0.691602207	0.657774633	0.65627349	0.37794464	0.658817632	0.949721212	0.588298848	0.733273741	0.944624796	0.134758145	0.820769879	0.628082972	0.597648575	0.529417552	0.985797813	0.643519762	0.268263629	0.269335848	0.561857559	0.561184043	0.215801866	0.606112408	0.543323631
TCGA-EE-A2MC	1871	1	0.455311736	0.321839417	0.582529288	0.280766939	0.457188383	0.367243133	0.224105646	0.202633613	0.29514349	0.348670236	0.38989719	0.418906811	0.502155335	0.531790723	0.54108643	0.442485158	0.457220862	0.499032285	0.448567807	0.385145693	0.570439232	0.29984422	0.482933828	0.436112785	0.675312796	0.506236374	0.520954416	0.549430675	0.744126925	0.878675433	0.452654501	0.650701148	0.835728109	0.075239887	0.759912665	0.512543843	0.438813253	0.638146489	0.982852105	0.5417744	0.210823202	0.42953825	0.517286767	0.388369492	0.175429213	0.446339046	0.353453108
TCGA-EE-A2MD	1438	1	0.388162926	0.192797082	0.445942798	0.335999446	0.368106825	0.710195984	0.206382279	0.188865251	0.23158815	0.379492314	0.64891084	0.532564498	0.370723919	0.469917079	0.383225389	0.305574218	0.500923596	0.358541912	0.355265961	0.325786685	0.544969638	0.258687878	0.642734233	0.336751668	0.673743337	0.364685082	0.417041332	0.580553808	0.403871589	0.390773649	0.357518778	0.557204296	0.913988921	0.045627123	0.731302776	0.273260166	0.713999797	0.634033045	0.990238219	0.446810315	0.189697628	0.619998196	0.461994416	0.519730165	0.195279915	0.59537796	0.274401684
TCGA-EE-A2ME	3141	1	0.598168762	0.459600209	0.842483464	0.540805093	0.645818383	0.407850147	0.397115967	0.439404551	0.629442377	0.565997749	0.64428337	0.850731407	0.63055727	0.700174319	0.683632576	0.760289903	0.728364782	0.72451885	0.603296175	0.568450008	0.821057659	0.507643627	0.747275744	0.463019777	0.889111045	0.759883219	0.739556176	0.416915172	0.835971411	0.940862432	0.745421031	0.825046061	0.944999484	0.152115962	0.825916204	0.711478396	0.670720929	0.577379169	0.98644441	0.821774192	0.442722317	0.325408516	0.611697902	0.663710638	0.274756143	0.673426287	0.653882429
TCGA-EE-A2MF	8174	1	0.158461423	0.113244999	0.344394485	0.172640707	0.246800876	0.680377307	0.09226892	0.080509007	0.188480474	0.281311627	0.789176522	0.346197078	0.41883424	0.22271585	0.227418794	0.448161238	0.432903293	0.256391463	0.193832414	0.199205548	0.48733968	0.167396274	0.623895398	0.265972951	0.270785485	0.389075681	0.445305317	0.741232551	0.757446233	0.579048058	0.293080597	0.376207819	0.885289111	0.070154281	0.809032411	0.172544381	0.358826318	0.70907403	0.989450465	0.248711158	0.099384209	0.658226572	0.217381524	0.146966868	0.089387448	0.365643298	0.111465066
TCGA-EE-A2MG	3139	1	0.430297974	0.337162209	0.631338335	0.391774004	0.59366319	0.585997448	0.254154649	0.320594755	0.311734449	0.404339629	0.480108537	0.522686798	0.717758358	0.625704777	0.566988506	0.675855938	0.531804382	0.636365808	0.544589388	0.529176626	0.677183455	0.338234407	0.569532281	0.425607326	0.792219423	0.675235674	0.624615055	0.510399925	0.739180887	0.924389355	0.571715189	0.734031819	0.936534822	0.12704112	0.808013852	0.564356737	0.522981586	0.634290797	0.991231445	0.603510606	0.232485261	0.360277174	0.574264848	0.457533889	0.215426742	0.519680952	0.459266491
TCGA-EE-A2MH	516	1	0.472816319	0.334378514	0.73595639	0.37542376	0.489603714	0.565292046	0.296167113	0.228703319	0.223525758	0.399136185	0.540523082	0.712138381	0.533736897	0.563437653	0.555164751	0.728453534	0.482508692	0.638303609	0.443815079	0.462816987	0.599289178	0.40398048	0.58583497	0.442161328	0.813164912	0.668295812	0.724889575	0.521205174	0.582928775	0.901221555	0.604348111	0.631647525	0.866520294	0.131567126	0.845742395	0.516816358	0.453421367	0.607982331	0.988803552	0.639811107	0.233851037	0.447102093	0.549879435	0.468942044	0.219144248	0.618830917	0.468498797
TCGA-EE-A2MI	6225	1	0.335389433	0.239331105	0.405851117	0.274096473	0.351332829	0.473956118	0.407887235	0.156096388	0.270873941	0.318751814	0.612479479	0.459138415	0.360214924	0.415790904	0.589744014	0.369119665	0.294336091	0.329263934	0.338254614	0.301157579	0.616959473	0.365039596	0.451790762	0.350007766	0.648314252	0.496447808	0.442325737	0.511449712	0.700372791	0.944028082	0.422804902	0.659514517	0.917692031	0.050778384	0.577399495	0.357136502	0.569812073	0.417021138	0.987931997	0.433715186	0.146637458	0.14426456	0.323878149	0.339517691	0.150138222	0.479918482	0.298266485
TCGA-EE-A2MJ	2927	1	0.476843825	0.344400372	0.570759619	0.438735642	0.49592336	0.523850635	0.474370473	0.275532228	0.32809153	0.42747798	0.488250214	0.780171864	0.533508559	0.567309171	0.538650459	0.595552913	0.443994055	0.566231732	0.412841837	0.433924671	0.627425251	0.481153862	0.549147597	0.448541295	0.666769292	0.523265139	0.59124513	0.514297343	0.597869053	0.884654948	0.538837773	0.666914219	0.927861399	0.12198934	0.821353401	0.509300646	0.517116191	0.53528525	0.988923999	0.54626655	0.258120645	0.499150018	0.527802728	0.489964658	0.24360261	0.595443296	0.424807919
TCGA-EE-A2MK	4825	0	0.365631355	0.351626235	0.326197622	0.237903186	0.380932039	0.606319691	0.590622856	0.168576952	0.19573342	0.423561383	0.294881186	0.428193189	0.43705417	0.429233025	0.620724041	0.40669615	0.775215354	0.303361124	0.276908168	0.382134517	0.871811273	0.526145768	0.509384484	0.403474282	0.510754462	0.373530585	0.541278002	0.650652539	0.802977007	0.946528214	0.506154058	0.66569698	0.952764243	0.074427487	0.677978303	0.397972479	0.714333564	0.719895757	0.987825039	0.394374897	0.166789807	0.174034355	0.409695053	0.269574659	0.097102554	0.48528706	0.869793605
TCGA-EE-A2ML	6590	1	0.386887194	0.170070588	0.856779113	0.599065373	0.42548381	0.192945427	0.542883485	0.503857912	0.32138739	0.333808204	0.774824606	0.390075756	0.784914841	0.617125852	0.363081684	0.499783391	0.574666843	0.465382273	0.355817782	0.395751897	0.459278269	0.682722006	0.72040128	0.385544253	0.409747403	0.63888308	0.551876675	0.424769952	0.502985569	0.946842424	0.809850224	0.494013597	0.958267538	0.052923269	0.749744677	0.375620089	0.435513182	0.474962535	0.989226726	0.447184655	0.678465901	0.150603548	0.548930855	0.415213608	0.154350463	0.419467536	0.304978317
TCGA-EE-A2MM	5107	1	0.137873492	0.174190748	0.323230505	0.134288604	0.144353013	0.551485992	0.07552168	0.075846729	0.128855019	0.13142754	0.134180199	0.353710672	0.855810281	0.210066934	0.168545756	0.479968935	0.822253089	0.152575011	0.238325385	0.613218235	0.388238339	0.103233652	0.522367052	0.188988144	0.475943087	0.607035423	0.450266699	0.803187284	0.821161619	0.953885861	0.179816512	0.232618637	0.942849232	0.112368223	0.780345767	0.218948151	0.268160716	0.754846553	0.991376631	0.209136173	0.085196769	0.694656181	0.173398163	0.093792539	0.158795105	0.29568703	0.186915414
TCGA-EE-A2MN	1446	1	0.549534476	0.173386293	0.899188667	0.477553114	0.303790897	0.252600737	0.627929566	0.228678167	0.36153574	0.25471994	0.752396956	0.448222135	0.537341939	0.356176566	0.392749798	0.447725535	0.623469939	0.323645922	0.398778742	0.288819246	0.363975059	0.581108868	0.70651887	0.38706093	0.227490427	0.511316191	0.47069235	0.666072897	0.498583921	0.286980437	0.814679265	0.391686848	0.922934654	0.058901093	0.719980463	0.221188947	0.218227992	0.436813835	0.989043283	0.388877606	0.233589397	0.330710472	0.358105203	0.624537044	0.146283067	0.528796523	0.692019947
TCGA-EE-A2MP	7563	0	0.402097934	0.178289382	0.353262861	0.437501366	0.352292583	0.274550891	0.206698569	0.502788018	0.268629925	0.317540362	0.606143202	0.753715515	0.838134348	0.391055829	0.512731849	0.530900465	0.779581172	0.369609069	0.339222453	0.387947274	0.692017721	0.313947895	0.394636848	0.375726554	0.465869032	0.582797326	0.346407577	0.612844714	0.560157369	0.940517897	0.44870228	0.705094851	0.895350735	0.187371798	0.749469524	0.281391848	0.787621434	0.611693558	0.986364075	0.430427615	0.599087678	0.368910839	0.390954382	0.291008591	0.13740484	0.685463552	0.25210516
TCGA-EE-A2MQ	1315	1	0.560905635	0.13692391	0.797141497	0.715317924	0.32126538	0.77452563	0.328852584	0.226709176	0.458924845	0.419532854	0.695591124	0.299474965	0.781932591	0.446794876	0.342527221	0.79020328	0.738816993	0.298356353	0.273291929	0.257964736	0.449559844	0.381082401	0.671804301	0.293588589	0.824358696	0.733857387	0.771273917	0.453192406	0.568829859	0.942462368	0.310939727	0.427079816	0.934910897	0.096597196	0.841285128	0.323645618	0.810490471	0.730588445	0.9848375	0.309221864	0.212274162	0.586135451	0.476235205	0.766072402	0.126129555	0.434174332	0.38154612
TCGA-EE-A2MR	4088	0	0.494686695	0.36661747	0.872604058	0.39545796	0.516903139	0.49880042	0.329721902	0.281492032	0.569168594	0.396456307	0.668960587	0.638208358	0.874296262	0.546557585	0.497442	0.540685181	0.78137198	0.508930509	0.511827523	0.565596906	0.831920011	0.430392474	0.68806552	0.424488804	0.836666941	0.614591011	0.683048077	0.49614056	0.754261842	0.961793611	0.633098545	0.822794202	0.942960802	0.087997833	0.836298088	0.555370664	0.681284393	0.498564912	0.987107112	0.586237648	0.249880304	0.305167869	0.490119068	0.460016431	0.228516742	0.491313793	0.672849169
TCGA-EE-A2MS	4942	0	0.244298817	0.139195449	0.847254013	0.346972353	0.32174979	0.826530811	0.671567651	0.349425053	0.243520976	0.417802618	0.873861483	0.27755069	0.875703165	0.357974648	0.274944945	0.609917918	0.315252922	0.302682344	0.210183848	0.500258296	0.400905034	0.692509599	0.593846717	0.308873155	0.448059397	0.731962587	0.55400423	0.728395767	0.851303252	0.941830367	0.488275569	0.32831324	0.955686472	0.05454336	0.819050071	0.900649944	0.647465456	0.737848606	0.989548369	0.247188767	0.381128398	0.794624988	0.369937395	0.385693939	0.146548917	0.341035046	0.819226256
TCGA-EE-A2MT	2166	0	0.226249199	0.119755628	0.786875876	0.213637718	0.240716916	0.065906627	0.106706823	0.116219598	0.612653482	0.185679446	0.219728725	0.171360605	0.302959285	0.292216265	0.240340947	0.21139243	0.213301453	0.251793707	0.223933845	0.211018502	0.295688956	0.117414472	0.511023361	0.266284214	0.299339539	0.817645611	0.235416075	0.796424673	0.240430231	0.959580472	0.230013188	0.326503865	0.92841607	0.029442265	0.673775778	0.205431589	0.285727815	0.431283224	0.970145677	0.316616681	0.104282221	0.784015768	0.242498473	0.137831743	0.142093912	0.256369748	0.129792232
TCGA-EE-A2MU	1620	0	0.483208367	0.325844716	0.69297184	0.4995837	0.491184204	0.496739819	0.493531231	0.268126454	0.329989713	0.416879255	0.592453352	0.424055173	0.615502625	0.506307718	0.569912365	0.656441709	0.472041024	0.532547732	0.423635029	0.469775633	0.635437107	0.463653588	0.590132908	0.43375221	0.841695659	0.643511238	0.659358409	0.375483529	0.637148691	0.897502242	0.504762205	0.718397806	0.934674323	0.095352832	0.766775196	0.558710482	0.576362172	0.50696335	0.987899435	0.53965599	0.265717119	0.357820824	0.507700686	0.452671516	0.236594027	0.455847998	0.632273868
TCGA-EE-A3AA	3781	0	0.457636575	0.34483447	0.661459683	0.522984383	0.571110185	0.570401492	0.27729405	0.481765714	0.421579464	0.520222999	0.518041006	0.56807602	0.820590594	0.599304672	0.55392737	0.763517152	0.796957795	0.607411194	0.523902494	0.482000085	0.856920357	0.386952069	0.768576305	0.448444313	0.710997694	0.733816367	0.758842147	0.53753117	0.73768095	0.897418127	0.736877934	0.736149815	0.929291357	0.182567389	0.829972228	0.570125187	0.531681063	0.644928191	0.988704592	0.564441461	0.549046267	0.347293007	0.554543426	0.476947757	0.220755656	0.498402152	0.490370603
TCGA-EE-A3AB	3733	0	0.671495429	0.246624147	0.652137646	0.423081216	0.444272314	0.47146095	0.562404937	0.601122832	0.184215611	0.25320234	0.710862763	0.212686739	0.577246868	0.490548794	0.3824436	0.542327562	0.522695147	0.408904832	0.384882016	0.316074953	0.698121228	0.593601967	0.645908424	0.285739744	0.856606103	0.532651999	0.454223765	0.538466595	0.847945425	0.949870908	0.374279239	0.736078647	0.950442894	0.023721734	0.827192266	0.673161424	0.439465156	0.633103762	0.988470855	0.458101537	0.703017021	0.109584812	0.405001049	0.233252225	0.13022348	0.37564777	0.166673245
TCGA-EE-A3AC	1570	0	0.322074932	0.186755264	0.458085728	0.219429681	0.295563771	0.642866957	0.173094002	0.157926619	0.682313577	0.25385387	0.630298477	0.452255289	0.346334833	0.444077599	0.371194561	0.380010114	0.271757792	0.319841745	0.288746605	0.31706575	0.439834101	0.334670779	0.750566536	0.324335662	0.37021812	0.480649548	0.394981203	0.688764377	0.375856754	0.929579814	0.372239707	0.465362336	0.952005965	0.051977094	0.82467843	0.291764097	0.388335143	0.680057242	0.990997928	0.389974593	0.178342264	0.621053635	0.330844384	0.252017375	0.231934964	0.435750945	0.256136522
TCGA-EE-A3AD	875	1	0.096672477	0.080610412	0.267703521	0.144104629	0.10911242	0.630432988	0.052049247	0.05521191	0.178027615	0.124308983	0.082475856	0.092262999	0.154034035	0.092958428	0.144780054	0.10741459	0.094049206	0.101853218	0.096992381	0.206067891	0.191767504	0.102537228	0.417099519	0.048165393	0.086877054	0.56248129	0.199521623	0.829939413	0.139001053	0.902074752	0.082084077	0.112737283	0.939972914	0.042293872	0.448624578	0.071494814	0.352836046	0.622846507	0.985689252	0.087437231	0.095407542	0.816363307	0.107909453	0.029257625	0.047783396	0.137435489	0.134120446
TCGA-EE-A3AE	1658	0	0.311698359	0.338125845	0.373160682	0.552879593	0.465771299	0.536520207	0.276070927	0.389994114	0.303014718	0.252585979	0.442957569	0.296779494	0.619785281	0.354737684	0.299139229	0.614698452	0.339389055	0.271190658	0.272180489	0.593602286	0.86326482	0.495036547	0.389239634	0.310061485	0.881205715	0.751620216	0.602820369	0.719733501	0.550941479	0.957475003	0.33950714	0.735505574	0.924046495	0.092192292	0.843712677	0.22410812	0.625094534	0.647344002	0.985387287	0.357310828	0.424128386	0.473810913	0.295883484	0.278338095	0.13919715	0.33652223	0.739440243
TCGA-EE-A3AF	420	1	0.25735602	0.265760426	0.357252464	0.464232644	0.322247465	0.76043651	0.139999514	0.180024921	0.194946156	0.235915471	0.713264488	0.176426425	0.435727007	0.418654222	0.246738224	0.308046243	0.761954122	0.297794389	0.294109777	0.353502803	0.372814151	0.168969253	0.521738273	0.368887707	0.825278114	0.449298345	0.436340032	0.647294824	0.591678748	0.922656742	0.411627668	0.447599718	0.951783455	0.032450108	0.751219898	0.276360485	0.389841525	0.606185388	0.988408228	0.380647414	0.173332639	0.088356594	0.410479253	0.259860057	0.206009032	0.767333711	0.214244675
TCGA-EE-A3AG	1265	1	0.194710603	0.077422306	0.243669966	0.179555248	0.196484853	0.822036006	0.079663846	0.66226484	0.071001437	0.131213536	0.085989735	0.056204479	0.243132588	0.213981323	0.209258898	0.369135046	0.222788141	0.161828305	0.12980714	0.183054681	0.350109702	0.119148863	0.627444015	0.130034732	0.361036185	0.284489591	0.248005757	0.255160996	0.702819339	0.933385833	0.164491447	0.324657992	0.87020762	0.033847837	0.752167095	0.113857469	0.201926938	0.661966186	0.98859737	0.232394428	0.567253129	0.154703117	0.181499633	0.038839207	0.052178985	0.15544025	0.060099433
TCGA-EE-A3AH	4222	1	0.101174271	0.075966431	0.155822205	0.22702969	0.511863663	0.790073369	0.04664761	0.127153455	0.092738731	0.100343263	0.867041416	0.370625344	0.850160943	0.180495392	0.190620212	0.671793421	0.142420139	0.14561404	0.129306592	0.378964953	0.849361036	0.058422046	0.220296948	0.096690982	0.277550118	0.603024842	0.44304739	0.807027563	0.67968749	0.231740321	0.127807376	0.760965476	0.85134176	0.022842876	0.790993437	0.249132584	0.353031321	0.841674791	0.991919061	0.123609162	0.089706077	0.147171482	0.138805574	0.042794698	0.072798338	0.464851487	0.142057267
TCGA-EE-A3J3	5237	1	0.265533825	0.164517676	0.404731456	0.331527063	0.286371215	0.765932117	0.393678312	0.132567259	0.209577298	0.257013429	0.680912953	0.532899943	0.369357525	0.299865446	0.334266117	0.549474645	0.649727678	0.248758831	0.252645389	0.276860256	0.497980759	0.401629303	0.612838964	0.30125373	0.606843665	0.455002586	0.447582055	0.705453397	0.73713541	0.750866291	0.360981526	0.547361183	0.792064088	0.059028335	0.749152306	0.314673364	0.764690296	0.680755235	0.978088601	0.333419058	0.135906121	0.607522001	0.291882972	0.218067617	0.144586845	0.453477845	0.384406224
TCGA-EE-A3J4	3869	1	0.212191595	0.202203065	0.83053452	0.77013285	0.385670205	0.696905317	0.905137936	0.101011024	0.888261766	0.320450749	0.904807252	0.890284587	0.877577592	0.909795223	0.677375828	0.881737823	0.177018744	0.736014092	0.628619243	0.175457308	0.303559426	0.818972199	0.759255276	0.438086158	0.942067939	0.839280848	0.559601367	0.739176126	0.558336023	0.748258133	0.780147113	0.281607577	0.953731877	0.195157981	0.858517559	0.419568055	0.540581244	0.555344447	0.989937366	0.274064958	0.12022999	0.334050288	0.914304789	0.401168212	0.102211384	0.85882545	0.486046853
TCGA-EE-A3J5	1124	1	0.307155863	0.186066762	0.373035222	0.276652163	0.32205776	0.307666859	0.206745417	0.174770477	0.296683696	0.298711961	0.525641032	0.320267348	0.311076554	0.386918342	0.293716589	0.317038562	0.328809115	0.355398648	0.279877977	0.308768933	0.456835041	0.302007913	0.406439808	0.40376219	0.301882118	0.356645932	0.386205712	0.600493888	0.343735001	0.917973328	0.402369375	0.533788216	0.908336844	0.052972606	0.617160091	0.326388879	0.357630264	0.563571553	0.989721559	0.428983712	0.15433949	0.620831378	0.345838772	0.241247688	0.164261207	0.375850161	0.204105127
TCGA-EE-A3J7	1949	0	0.231637616	0.314516959	0.59909701	0.658829737	0.531868809	0.653903668	0.653378615	0.581487564	0.482456479	0.543643719	0.608195166	0.304607032	0.490308265	0.574475911	0.618641712	0.719399468	0.615442823	0.555276715	0.534051139	0.174746188	0.785159258	0.649721731	0.495751696	0.327333562	0.711814177	0.74256123	0.643564052	0.736977203	0.788793012	0.897048043	0.683364625	0.764256526	0.947275345	0.239927695	0.781116284	0.504658617	0.253155416	0.738982511	0.981690838	0.636412311	0.665628617	0.796157422	0.607667865	0.230744033	0.122217368	0.411094813	0.184070712
TCGA-EE-A3J8	1044	1	0.746802051	0.064699564	0.4302746	0.333570473	0.256755848	0.095589759	0.066512308	0.697679422	0.091966761	0.077501057	0.885126501	0.060594633	0.903161023	0.084466526	0.134930972	0.25373213	0.735196108	0.112163579	0.102449812	0.141173836	0.299991742	0.043466444	0.136746311	0.016764053	0.076267928	0.53093723	0.163684107	0.797164926	0.470589301	0.46099009	0.100057792	0.150760791	0.684973268	0.021879003	0.497335076	0.113918384	0.138423061	0.689753554	0.983452674	0.070275664	0.752636609	0.822867323	0.050760346	0.035136188	0.058330284	0.102461852	0.047539541
TCGA-EE-A3JA	1618	1	0.436295767	0.162581114	0.313886618	0.240929709	0.313046498	0.41850021	0.119036329	0.114011747	0.18783802	0.254271115	0.243754889	0.218703397	0.445787018	0.323234785	0.26614253	0.50829514	0.728364752	0.310454581	0.322734721	0.340293559	0.344187631	0.198472199	0.618953222	0.335410759	0.574805726	0.525921781	0.521852852	0.667698758	0.4631107	0.562876921	0.452809529	0.409894518	0.908473887	0.05320055	0.681772417	0.238120624	0.363053104	0.350436897	0.984612796	0.436507955	0.118387815	0.071768663	0.271767544	0.214679617	0.148785452	0.281379116	0.300037158
TCGA-EE-A3JB	6138	0	0.506014985	0.200488392	0.316432785	0.485948599	0.338011001	0.594420862	0.500238731	0.419143062	0.225008468	0.231118435	0.211057313	0.342260731	0.620606935	0.376432736	0.356905076	0.430221889	0.661409399	0.290309451	0.222011265	0.385104885	0.707747674	0.492240492	0.72038571	0.35295675	0.661987198	0.547153084	0.515136814	0.329060513	0.765087409	0.950196872	0.317457306	0.791700936	0.936316704	0.117013174	0.815759468	0.447593638	0.550539036	0.670689652	0.987889914	0.36206651	0.428901043	0.262605601	0.314932017	0.284675004	0.150304759	0.434217264	0.193119191
TCGA-EE-A3JE	1562	0	0.527883667	0.392827052	0.62652112	0.396023681	0.535260403	0.379570625	0.310447908	0.364272872	0.502935499	0.416921396	0.619537786	0.646830035	0.640142936	0.581417001	0.642969928	0.54341413	0.506188609	0.511628049	0.529103222	0.494064415	0.671471195	0.392225086	0.619538982	0.475948207	0.697684799	0.640553598	0.581883264	0.434021926	0.846739032	0.937889147	0.672836274	0.720291936	0.931343576	0.139114683	0.822665056	0.607266082	0.596794621	0.459922299	0.989894646	0.58956355	0.298131692	0.126196273	0.588680609	0.501652424	0.205707455	0.655639875	0.557281422
TCGA-EE-A3JH	3333	0	0.4669184	0.398641762	0.759675043	0.485546977	0.539990632	0.462426991	0.41684949	0.24651023	0.501162306	0.409531648	0.573760176	0.742466153	0.571138701	0.537148563	0.542659681	0.625002227	0.755060084	0.572156876	0.505852915	0.57857294	0.630758622	0.459020752	0.694614803	0.463207559	0.877907951	0.686952969	0.577545027	0.353362367	0.770428817	0.93714261	0.589493722	0.698516721	0.954853655	0.130008124	0.780155441	0.522692173	0.686894145	0.474061615	0.985906009	0.616498374	0.220728996	0.342888146	0.596657204	0.473565723	0.192346727	0.717927632	0.685496455
TCGA-EE-A3JI	4648	1	0.734225512	0.085586499	0.902614472	0.48221883	0.458521601	0.73070347	0.536377598	0.272686469	0.173307628	0.116070245	0.844743942	0.1992926	0.878950187	0.893519619	0.622292198	0.821005107	0.817632747	0.280984594	0.184480497	0.217023712	0.709214771	0.788351711	0.528247703	0.152148005	0.677506168	0.568732088	0.625816971	0.736564981	0.684222752	0.908597233	0.519044496	0.715760522	0.947064956	0.101890505	0.884312809	0.147712664	0.149484007	0.734223857	0.990590897	0.279241425	0.365114443	0.506099015	0.96630138	0.069554793	0.075869388	0.288769754	0.348328964
TCGA-ER-A193	955	1	0.406625292	0.271349129	0.532059325	0.614165982	0.456863275	0.604146221	0.235089673	0.175355123	0.282875128	0.480310093	0.458421867	0.382836341	0.440502001	0.411851906	0.354809607	0.590501761	0.678005202	0.347332319	0.351064649	0.433533538	0.75379026	0.297519089	0.706072223	0.383723524	0.871604235	0.590506594	0.544836807	0.555493732	0.640554438	0.940951811	0.615618817	0.646642613	0.931699124	0.106508035	0.840285785	0.43166328	0.732375026	0.54668067	0.990383602	0.443884843	0.178673837	0.510533475	0.423851071	0.380325529	0.20424014	0.394514564	0.352197722
TCGA-ER-A196	1785	0	0.33712848	0.259976193	0.495586664	0.188668616	0.47591063	0.824780739	0.129720292	0.150418936	0.118696383	0.205774973	0.280230186	0.321842023	0.51555179	0.500820706	0.544436827	0.547241114	0.502339293	0.42449355	0.399135374	0.368175209	0.562732185	0.131880668	0.525469442	0.237708464	0.679991324	0.536519717	0.469072949	0.740986126	0.599902738	0.845775317	0.484576297	0.611633052	0.925504287	0.039753302	0.715232553	0.512189999	0.352730885	0.719846414	0.987415921	0.48386231	0.193931479	0.481853138	0.451777058	0.093885085	0.116567714	0.313361542	0.202437361
TCGA-ER-A197	424	1	0.335006508	0.309128622	0.523871845	0.28267623	0.511182219	0.744096822	0.191818191	0.182550424	0.26411151	0.327384912	0.215949924	0.261854053	0.682671818	0.617289169	0.474674903	0.543502419	0.675898424	0.430576324	0.467768738	0.555920756	0.471930844	0.254048645	0.694318013	0.359634528	0.444481865	0.462431725	0.573838468	0.647355483	0.688207749	0.868065596	0.440703328	0.560183036	0.930555099	0.040476497	0.790857913	0.624714039	0.557072881	0.626207504	0.991756702	0.501294886	0.206183261	0.171435587	0.657235385	0.416414805	0.202487146	0.418327219	0.689027956
TCGA-ER-A199	279	1	0.436768279	0.412130258	0.611665691	0.337592565	0.475649516	0.589160087	0.218403546	0.284172223	0.502103667	0.313667181	0.549062957	0.487303821	0.485692369	0.56258584	0.658877699	0.55735376	0.454778126	0.472764102	0.438410729	0.440359645	0.742080824	0.26367393	0.562056688	0.460827429	0.672263833	0.601642408	0.614695693	0.511478874	0.812819234	0.858229441	0.553130983	0.721017622	0.923926014	0.078465639	0.747573682	0.597759517	0.643293941	0.635978131	0.9885404	0.560707854	0.2162861	0.423700807	0.557209937	0.437339647	0.191275909	0.472317152	0.347191649
TCGA-ER-A19D	383	1	0.223387168	0.17129535	0.488654314	0.235879167	0.277889601	0.823874725	0.132175285	0.184082642	0.16977273	0.254382195	0.237581932	0.164598507	0.29384811	0.342958524	0.355554435	0.60480577	0.528514215	0.262077543	0.30244614	0.255995639	0.471507654	0.224021677	0.382005213	0.334441359	0.564586708	0.441010641	0.392896605	0.718813269	0.859851419	0.93113061	0.294954827	0.356285739	0.940546357	0.04699133	0.286208346	0.382555994	0.686311418	0.765729373	0.949327044	0.334512994	0.189105432	0.77929635	0.332740748	0.202018781	0.144088695	0.305033605	0.163984214
TCGA-ER-A19E	396	1	0.287107952	0.171431646	0.322918421	0.160786022	0.274258373	0.814440412	0.169198348	0.125411664	0.091603993	0.1863903	0.191943944	0.169449122	0.364781513	0.38652917	0.568881096	0.414538803	0.584211566	0.207387189	0.278064905	0.22784956	0.595205804	0.227065861	0.338660785	0.3006399	0.36749161	0.303942287	0.37386377	0.662562396	0.842646463	0.798106717	0.2958464	0.455637373	0.886042725	0.053525765	0.410620061	0.285298272	0.643287361	0.749228739	0.941215785	0.265945781	0.117122158	0.73914613	0.358631169	0.227261249	0.117435657	0.248309253	0.134181648
TCGA-ER-A19K	469	1	0.373613233	0.266938162	0.457349775	0.443383078	0.421200465	0.759984086	0.153018571	0.218908577	0.501508982	0.266970249	0.327874574	0.347727999	0.420877018	0.390499805	0.416273864	0.463677121	0.366761807	0.388834948	0.346094649	0.305223474	0.451411251	0.216163833	0.73010932	0.328010645	0.47527354	0.570185378	0.454674972	0.338234699	0.399347774	0.949769637	0.44376956	0.523282019	0.893360914	0.049459538	0.772244562	0.591510262	0.404392221	0.613671239	0.986624956	0.444607774	0.254343889	0.609245296	0.343265807	0.290247297	0.142223428	0.351091835	0.279398858
TCGA-ER-A19M	1857	1	0.480259578	0.28218758	0.529891676	0.383749829	0.545539837	0.30408639	0.3674736	0.619932631	0.328430681	0.428318874	0.739053916	0.488096456	0.748913445	0.571557166	0.466540914	0.655764239	0.751572479	0.561657003	0.397139705	0.573833888	0.609030927	0.446695738	0.580763533	0.492665355	0.75089355	0.667586736	0.530185096	0.540345909	0.809949128	0.720245073	0.540010868	0.615951196	0.940870146	0.091424237	0.751368985	0.643553785	0.774707469	0.537841787	0.990280061	0.549304943	0.641384368	0.136533513	0.583787933	0.549148198	0.214869745	0.530763691	0.392702011
TCGA-ER-A19T	270	1	0.053841585	0.067893833	0.095985362	0.266775826	0.111438577	0.866274474	0.055768436	0.181785985	0.041094801	0.194393253	0.879034523	0.092421616	0.548584947	0.059706533	0.116639709	0.150337525	0.088104698	0.075321257	0.067519467	0.089170131	0.263587596	0.162084866	0.187681311	0.014645036	0.538578836	0.45960631	0.456132902	0.774290884	0.377263058	0.915696714	0.051281726	0.120282184	0.773833584	0.01605403	0.561590332	0.185846889	0.082176228	0.685700659	0.986677114	0.018593502	0.121000097	0.623875548	0.056803021	0.03975584	0.050218643	0.158699462	0.057774067
TCGA-ER-A2NB	857	1	0.42946622	0.364341955	0.800572367	0.507803161	0.513940119	0.724143028	0.173102393	0.311241687	0.349421819	0.479023971	0.665203512	0.419990037	0.440647436	0.510281454	0.769971051	0.710920204	0.418930251	0.422152704	0.41769941	0.387431831	0.567997531	0.32156658	0.692013239	0.425461153	0.774553652	0.616141614	0.625081561	0.595469101	0.752392813	0.831462295	0.650103426	0.623758323	0.919939952	0.0765424	0.824225345	0.479848485	0.428884832	0.672582723	0.991356539	0.543401314	0.382883961	0.593141358	0.488817145	0.283444284	0.179403914	0.573774648	0.325098498
TCGA-ER-A2NC	1333	1	0.232547881	0.182580596	0.389322108	0.285920794	0.318529089	0.737214845	0.29948181	0.350692916	0.108673564	0.231495248	0.299277005	0.140153266	0.389257686	0.338434419	0.572772534	0.577253113	0.681251352	0.305542809	0.268878638	0.316116891	0.622891312	0.344016815	0.425951406	0.163372123	0.644541234	0.392752339	0.3812711	0.680813494	0.851796658	0.254718682	0.296541134	0.533139012	0.942579304	0.027434898	0.458228072	0.569312048	0.442043355	0.773684225	0.99140549	0.425537455	0.306484547	0.730192023	0.305968526	0.121033894	0.105958226	0.200217343	0.149599239
TCGA-ER-A2ND	710	1	0.219591303	0.228981023	0.254777756	0.653801575	0.237900549	0.751361213	0.666997126	0.117393161	0.14159269	0.278948679	0.239835926	0.476755402	0.415721285	0.444233523	0.336100993	0.315762799	0.285772464	0.252248017	0.253625639	0.385996388	0.408382605	0.612371807	0.594084955	0.303548526	0.507352593	0.368692024	0.288510225	0.769298196	0.716104172	0.79433623	0.811691772	0.50620411	0.929605785	0.066609435	0.645147828	0.290968338	0.798714013	0.69269884	0.98958299	0.367058341	0.10316985	0.566389607	0.345585523	0.176535936	0.131581436	0.602775507	0.785304281
TCGA-ER-A2NF	877	1	0.366230509	0.263286161	0.485134415	0.291718557	0.413336407	0.671375826	0.203151313	0.228500225	0.328157851	0.300548512	0.32780301	0.319976352	0.344211895	0.50173638	0.337118056	0.455951925	0.372062005	0.37184823	0.314113017	0.402438837	0.456545545	0.282201879	0.560435194	0.413588514	0.338634024	0.531746308	0.456861009	0.616889143	0.561815717	0.925143939	0.433062027	0.508229616	0.828155528	0.074803244	0.761506894	0.37861462	0.43395846	0.577394633	0.987447157	0.462522881	0.213400141	0.616247458	0.45347651	0.358711831	0.191094461	0.388086686	0.271016654
TCGA-ER-A2NG	1490	1	0.421002281	0.345791293	0.62479033	0.616760217	0.491382349	0.483682098	0.318994069	0.355209207	0.655966056	0.442432291	0.700965367	0.652344959	0.519148709	0.631876213	0.42530163	0.478955488	0.373431919	0.536967053	0.406045396	0.447564429	0.616527435	0.445559194	0.736583174	0.431353579	0.544957876	0.604772339	0.511609542	0.476371617	0.545447845	0.953254158	0.527000968	0.679169843	0.957811971	0.105313268	0.770551138	0.55053916	0.633834643	0.636334332	0.990136993	0.545388858	0.343375206	0.479282266	0.513913119	0.626089733	0.193430727	0.584109409	0.527788352
TCGA-ER-A2NH	1264	0	0.382265361	0.363001956	0.805630111	0.417306765	0.561970137	0.342100184	0.442408301	0.36020966	0.497642186	0.491215382	0.620135963	0.757579151	0.495062295	0.641857266	0.596912706	0.688265734	0.754985462	0.56340331	0.425113562	0.503663952	0.69727328	0.489865085	0.494690764	0.455449247	0.728934652	0.641740876	0.539943576	0.4170515	0.832400142	0.847913585	0.504444451	0.579904281	0.927293031	0.112606759	0.748897102	0.595561861	0.773950387	0.6309597	0.98972056	0.536187633	0.342715573	0.312737498	0.608721055	0.594347756	0.241081733	0.621244239	0.375827941
TCGA-ER-A3ET	2829	1	0.274308972	0.218283177	0.634314972	0.231134012	0.478562838	0.66466575	0.699721664	0.148184669	0.169248655	0.239320607	0.711485949	0.219369398	0.449275571	0.433682085	0.472004653	0.437085632	0.551638504	0.421976536	0.301472493	0.334976386	0.607762219	0.586428657	0.455237102	0.323248187	0.368887157	0.491061528	0.414567253	0.728931069	0.711187547	0.902271648	0.533350038	0.546284638	0.898771028	0.050473329	0.640421386	0.363096252	0.335336172	0.779526359	0.979701116	0.459232215	0.131374827	0.542178541	0.436912749	0.253722667	0.156603	0.305684775	0.307587809
TCGA-ER-A3EV	1429	1	0.317261903	0.134022868	0.29339451	0.167144911	0.29188368	0.516166467	0.121294949	0.132739129	0.203113312	0.25560771	0.218829562	0.207643149	0.365545456	0.3474657	0.285859149	0.469095017	0.259805338	0.314708597	0.24126391	0.265141163	0.325451653	0.172754828	0.267265104	0.339729464	0.273284087	0.393606119	0.45304983	0.655492926	0.578973143	0.942132197	0.310388631	0.342401731	0.704799759	0.038021982	0.264338543	0.212397274	0.241474596	0.541206261	0.983525499	0.275054967	0.144139451	0.709810429	0.31163142	0.149795766	0.116333447	0.340132653	0.133423317
TCGA-ER-A3PL	1010	0	0.17699422	0.247287627	0.219742896	0.359401067	0.206882896	0.830337816	0.798930954	0.052982371	0.111296301	0.248795339	0.164708276	0.494311379	0.411728506	0.209327079	0.677472566	0.200192981	0.356542835	0.169915968	0.193611886	0.533507915	0.721338034	0.806054776	0.752813082	0.110600609	0.397652598	0.52351209	0.477588098	0.850581484	0.496882546	0.957939812	0.212321282	0.718218819	0.947827045	0.051360103	0.661004994	0.181380701	0.86855942	0.506278008	0.97983722	0.275403028	0.093260083	0.232877146	0.181683984	0.055282473	0.164130214	0.48217265	0.738443368
TCGA-ER-A42K	394	1	0.252604132	0.158056131	0.241471278	0.201812083	0.272827257	0.442962161	0.081610756	0.341937499	0.083530701	0.17060986	0.294404027	0.166771486	0.495031013	0.301983803	0.358936103	0.535730115	0.31003194	0.230150645	0.232028523	0.268717771	0.849667399	0.094836195	0.728208848	0.251734307	0.653639521	0.555912224	0.534615257	0.815974089	0.807271432	0.727558172	0.37524967	0.910859611	0.899299637	0.037608316	0.739008977	0.352770207	0.474951388	0.691444559	0.987031522	0.315532573	0.359025581	0.589621884	0.323541089	0.110642298	0.126598526	0.23631616	0.12975374
TCGA-ER-A42L	4533	0	0.482383427	0.313919139	0.733469517	0.45859999	0.51452634	0.654932635	0.346611095	0.524298135	0.36524649	0.480545444	0.532428735	0.584479547	0.58530404	0.554305554	0.441769157	0.47074086	0.714461414	0.483170318	0.551183845	0.438353877	0.811454886	0.361717299	0.597059064	0.396530158	0.703942313	0.641261024	0.6068203	0.594786063	0.762194908	0.945307928	0.596893128	0.800065563	0.949009388	0.08964031	0.809351466	0.64114291	0.642828961	0.665477394	0.989858438	0.620652959	0.615328146	0.389477838	0.555144163	0.466739708	0.185734213	0.433574004	0.446459347
TCGA-FR-A2OS	368	1	0.17739757	0.08583176	0.459452226	0.08321723	0.243860485	0.938969484	0.03689685	0.056909419	0.046105195	0.126478894	0.132329767	0.118667608	0.36255854	0.238007901	0.27925577	0.241240095	0.192796541	0.212631732	0.191410466	0.294690256	0.317525868	0.055195232	0.280913827	0.110625235	0.232795065	0.359946589	0.319543638	0.797794758	0.325960416	0.672400044	0.21214766	0.34231543	0.757903942	0.1027164	0.674604072	0.197204882	0.324884919	0.733829872	0.981081949	0.275684075	0.078062517	0.718492414	0.246501058	0.060932584	0.073974131	0.193788085	0.126205164
TCGA-FR-A3R1	685	0	0.385792592	0.495558944	0.867808757	0.696920496	0.573795231	0.530621074	0.662095612	0.526987425	0.781364714	0.50882121	0.711225971	0.315141679	0.880214265	0.400706369	0.360258093	0.833222805	0.588184366	0.772823541	0.627177688	0.608138552	0.887579448	0.69994311	0.723189191	0.393508336	0.931121966	0.850494789	0.80495854	0.639441256	0.599051633	0.950826709	0.836289767	0.960012316	0.94547232	0.181505516	0.809185112	0.377324979	0.540506839	0.580521736	0.987122064	0.446145308	0.476116332	0.11221879	0.475750497	0.808210552	0.126325563	0.501214901	0.774641358
TCGA-FR-A3YN	2828	0	0.390787762	0.20171981	0.322552392	0.393713795	0.311100087	0.579298794	0.233428665	0.157914389	0.190929822	0.302653544	0.39593536	0.473689165	0.321082448	0.40665456	0.366877186	0.216161201	0.339646857	0.30183807	0.273671039	0.291614339	0.434521613	0.357669457	0.453457778	0.368688335	0.280198924	0.216045067	0.379809975	0.680896883	0.256852921	0.848670496	0.465476228	0.49080206	0.913815974	0.067232028	0.764886383	0.161531866	0.650236335	0.606351053	0.990984834	0.391116958	0.185550896	0.700914692	0.387098786	0.318062493	0.156226013	0.45018366	0.669044406
TCGA-FR-A44A	5299	0	0.543761898	0.416044418	0.625081533	0.477193344	0.57154503	0.327652304	0.547815019	0.387169809	0.417344487	0.534837329	0.594597104	0.617987414	0.69577614	0.616683628	0.641181802	0.513832068	0.54718264	0.593433919	0.427055132	0.486303935	0.657858981	0.588059997	0.69303218	0.443502666	0.769797822	0.544480991	0.548878528	0.380728371	0.576836251	0.567993737	0.554324499	0.723993348	0.939619881	0.141929092	0.764152699	0.476836826	0.484913805	0.489272652	0.986909268	0.581144693	0.366729781	0.163666785	0.623598416	0.581608606	0.211615383	0.581231283	0.508811564
TCGA-FR-A728	583	0	0.414166479	0.439452573	0.806117067	0.498854126	0.410862712	0.502210415	0.351691846	0.264239073	0.539234298	0.431656144	0.586122795	0.586086807	0.53198611	0.464874114	0.454647023	0.596453051	0.743200447	0.477771063	0.408743578	0.372349216	0.468779284	0.401580491	0.72156683	0.381357543	0.864106875	0.624398897	0.516486515	0.543783339	0.716629063	0.769578199	0.430477363	0.534248151	0.923180838	0.106234899	0.730023971	0.457612741	0.467517588	0.550704967	0.984250037	0.503617456	0.233532586	0.062928391	0.562009945	0.522645663	0.149066866	0.675674146	0.426394019
TCGA-FR-A729	6716	0	0.362686553	0.295358294	0.661662542	0.372613642	0.396486206	0.252235832	0.237160391	0.236005107	0.234829829	0.274361413	0.745413188	0.428393384	0.447140494	0.526644435	0.377252783	0.483467733	0.584510308	0.358558079	0.366087169	0.338298712	0.514395087	0.344387912	0.362427724	0.445440444	0.536744155	0.406820487	0.592398783	0.5107538	0.766825086	0.7080022	0.481191077	0.62184781	0.936985361	0.093809656	0.774595215	0.500985447	0.666670046	0.573005556	0.987728007	0.611872236	0.162460653	0.482870303	0.5560031	0.417630698	0.170316214	0.496930497	0.306231685
TCGA-FR-A7U9	571	0	0.372429534	0.345618024	0.458766677	0.298155887	0.382933852	0.634530241	0.181553202	0.220105862	0.290180491	0.288141988	0.374242384	0.45500283	0.356851301	0.507860851	0.429962733	0.371535534	0.433006771	0.456306561	0.375373617	0.360250117	0.536649069	0.278948907	0.495696445	0.455172526	0.713988152	0.622106596	0.412177968	0.439785606	0.794686564	0.82010921	0.472897396	0.604701576	0.932413217	0.068305909	0.81753363	0.415265761	0.560727192	0.594872043	0.988649884	0.504825051	0.213801587	0.504594496	0.546840128	0.409690509	0.173198107	0.444454148	0.329456231
TCGA-FR-A7UA	1164	0	0.538098875	0.45799425	0.820245502	0.527320871	0.574754476	0.221610719	0.472025112	0.383521683	0.571198085	0.516258661	0.601132305	0.839865171	0.559158073	0.630068302	0.625708829	0.668263991	0.640798914	0.651560619	0.538841245	0.46734019	0.781601399	0.505534091	0.645407206	0.523280135	0.729950935	0.636971596	0.667357999	0.340356251	0.782576743	0.926361225	0.802581923	0.776543543	0.949232412	0.166280868	0.796465237	0.573752168	0.600626251	0.414263946	0.987600518	0.658505056	0.330850531	0.159465454	0.642567916	0.68444878	0.131861339	0.720535405	0.587932479
TCGA-FR-A8YC	1059	1	0.225914126	0.188892857	0.918487167	0.54090328	0.373196923	0.162745929	0.682649022	0.137731891	0.306172144	0.199722368	0.860955469	0.628167273	0.308803334	0.255753912	0.374630584	0.491762509	0.788030392	0.292526043	0.259854101	0.299628834	0.431529228	0.663287063	0.742812806	0.25227943	0.321725216	0.383211039	0.429076558	0.735435186	0.633333518	0.493745005	0.77481042	0.338351903	0.935550153	0.090259179	0.746961144	0.250835894	0.680647297	0.551341634	0.985008663	0.28583258	0.143059929	0.373681057	0.265177452	0.181717537	0.093823594	0.641966045	0.118174767
TCGA-FR-A8YD	1103	1	0.169382765	0.137261956	0.918049856	0.413985765	0.345304599	0.853929712	0.527197996	0.214417819	0.304221366	0.238405122	0.808431666	0.428314562	0.642613354	0.253052834	0.28279085	0.635074364	0.21107869	0.340110572	0.229606049	0.559697913	0.409749385	0.526950404	0.254047341	0.153704427	0.560181619	0.507338	0.487609715	0.810539666	0.77269426	0.656441494	0.592129572	0.294607603	0.921485251	0.086723514	0.712176233	0.154719722	0.665125083	0.720241961	0.987049904	0.255463929	0.264442578	0.794413876	0.237176325	0.687709907	0.099818696	0.495111678	0.686871238
TCGA-FR-A8YE	3176	0	0.463732289	0.349489465	0.753155974	0.406605439	0.599325038	0.439373898	0.450782974	0.282005189	0.382178583	0.394761478	0.499800044	0.601283308	0.580778716	0.61475702	0.583984705	0.657966834	0.548665218	0.577619285	0.498358336	0.445831025	0.634103065	0.405005199	0.771665061	0.4295414	0.774786931	0.746173432	0.72856459	0.511071613	0.822730268	0.882383976	0.589386614	0.689635394	0.949712679	0.093667588	0.812426506	0.612408165	0.479229963	0.641347	0.985508515	0.592449891	0.229815173	0.156270646	0.589487657	0.467213713	0.19620525	0.514954613	0.446183236
TCGA-FS-A1YW	6598	1	0.210165403	0.135709782	0.400236215	0.369742144	0.395969601	0.442437665	0.159290744	0.463855472	0.233467342	0.263660803	0.303740686	0.469780023	0.263827523	0.333020403	0.412269704	0.518981761	0.780156224	0.269393843	0.337675365	0.678631596	0.859367544	0.167133328	0.576054043	0.340720227	0.476685678	0.573591488	0.431310471	0.727705847	0.794214379	0.934884075	0.811126842	0.903398239	0.814236537	0.137285402	0.729132974	0.295535772	0.812441285	0.611593162	0.987345622	0.311518972	0.514928266	0.152591649	0.277033573	0.154069083	0.161172043	0.359296522	0.168770023
TCGA-FS-A1YX	1478	1	0.284823114	0.25421567	0.418816381	0.362063198	0.319102675	0.856243363	0.252302202	0.105584513	0.288917887	0.2904623	0.212046687	0.661878118	0.387060926	0.441699826	0.519199873	0.441053572	0.460257531	0.293166704	0.332830651	0.417939925	0.730628503	0.357700991	0.431034529	0.312453862	0.318301654	0.411374952	0.369597773	0.76813977	0.693079027	0.7776529	0.782113623	0.575608814	0.907896461	0.058202648	0.763898835	0.371387526	0.44136104	0.82434938	0.98291419	0.424268309	0.124972281	0.769956326	0.365415281	0.192181919	0.12712563	0.640217948	0.569602841
TCGA-FS-A1YY	6953	1	0.2054564	0.411951352	0.75011168	0.366557124	0.238955068	0.882361193	0.57141359	0.409565619	0.226057491	0.157807481	0.236868996	0.609105045	0.395957569	0.363292062	0.661765334	0.734835068	0.686094728	0.276435073	0.328943325	0.625965285	0.564187897	0.635222733	0.742945207	0.196208347	0.359178215	0.438082517	0.600269731	0.776645876	0.333517093	0.948820796	0.300618391	0.593624377	0.952577911	0.051231911	0.830383454	0.389158624	0.82316537	0.738174726	0.981577828	0.284796322	0.539051062	0.52426328	0.297524948	0.096909742	0.131947995	0.573248714	0.720006176
TCGA-FS-A1Z0	6164	1	0.362656199	0.180077163	0.424948826	0.281180924	0.339492868	0.706725506	0.405745767	0.219840695	0.246964177	0.301231283	0.325173408	0.33572556	0.341578386	0.4119621	0.341896562	0.381758102	0.552400166	0.346044068	0.319583454	0.336070579	0.423225928	0.365315564	0.339739014	0.354970831	0.465604317	0.41887398	0.462329054	0.70780416	0.763566932	0.909426088	0.408557593	0.450049465	0.808861736	0.055062988	0.477093007	0.351711516	0.429235424	0.689638246	0.985013704	0.428473693	0.206927517	0.649470162	0.401808789	0.335635196	0.149238974	0.357916556	0.208956508
TCGA-FS-A1Z4	854	1	0.497703594	0.357526037	0.695603857	0.391028592	0.508933907	0.524895773	0.279028884	0.335068421	0.437486885	0.403577575	0.479331646	0.628209539	0.539772643	0.586558306	0.643428419	0.539910625	0.466520824	0.474602402	0.492088567	0.427545497	0.712116749	0.358453694	0.566805303	0.434585341	0.620530642	0.65275017	0.599872327	0.488404121	0.750170257	0.949476656	0.687315373	0.729581029	0.915262118	0.102092443	0.725608464	0.622725303	0.51727322	0.640354881	0.970936593	0.615841241	0.308829595	0.439895554	0.560931828	0.46631856	0.213399542	0.501279328	0.429802267
TCGA-FS-A1Z7	237	1	0.291042732	0.188360958	0.330786978	0.314060749	0.320863292	0.843236706	0.231674195	0.052698612	0.20289526	0.180001083	0.253101669	0.451035962	0.391302582	0.294061366	0.453761675	0.438172497	0.230889198	0.298815658	0.312174617	0.305716662	0.438967619	0.259782028	0.778236458	0.203905992	0.382074077	0.536346707	0.375654926	0.785000537	0.529302442	0.91997468	0.397130811	0.412357008	0.917858835	0.045563935	0.776827463	0.354105449	0.602834523	0.74457435	0.985495756	0.258243815	0.096702867	0.573825209	0.250961235	0.145271268	0.108639982	0.427535952	0.279854302
TCGA-FS-A1ZA	843	1	0.60874235	0.202634117	0.671825173	0.290518533	0.276784889	0.505898419	0.220051296	0.559854602	0.352165044	0.236902155	0.320701198	0.369561537	0.482117891	0.34478073	0.621228103	0.373816224	0.627532796	0.327962416	0.31178276	0.305739195	0.756363205	0.27049563	0.612938627	0.30917834	0.50320115	0.479870773	0.370755677	0.623617857	0.816029417	0.798785767	0.379812606	0.805923454	0.917391895	0.044634997	0.669401112	0.303521246	0.685329321	0.744664502	0.989516087	0.395474422	0.472125825	0.382677011	0.302253381	0.174253323	0.145453586	0.447867949	0.148184227
TCGA-FS-A1ZB	1486	1	0.272622252	0.166256782	0.421137564	0.24650946	0.377739808	0.789027006	0.124304132	0.173432042	0.176869087	0.212687046	0.311390116	0.383215547	0.366263832	0.432177172	0.409202854	0.518487955	0.330855097	0.324420196	0.355436027	0.343815001	0.463699853	0.173150151	0.387120279	0.346205895	0.495099496	0.651480911	0.521536013	0.705620016	0.541979592	0.884549883	0.397761486	0.491929456	0.881651096	0.056430749	0.697556251	0.33665656	0.438653604	0.727013678	0.989016089	0.410658385	0.255402379	0.515303967	0.38231724	0.155763641	0.211984365	0.359384302	0.181383183
TCGA-FS-A1ZD	1628	1	0.130214245	0.109624646	0.37887143	0.26254826	0.181292676	0.93980954	0.326758642	0.054391869	0.154864186	0.194812298	0.084924745	0.079390997	0.84434186	0.225619276	0.239279611	0.450567267	0.725218885	0.205293946	0.156703955	0.231040158	0.724574379	0.366619465	0.233936241	0.127628964	0.717971317	0.471131293	0.393811712	0.793539015	0.785520468	0.421283278	0.408633563	0.778726395	0.90277836	0.026417935	0.272675621	0.216324028	0.398469187	0.824399618	0.977069695	0.077430741	0.068820685	0.888183233	0.177781137	0.047737334	0.081352307	0.137999779	0.481644405
TCGA-FS-A1ZE	1413	1	0.127482984	0.082464734	0.5976039	0.379947496	0.152848205	0.838154832	0.376598063	0.065199674	0.117223894	0.233100325	0.129901717	0.407750307	0.224512576	0.147531945	0.252374131	0.303903485	0.159775497	0.130570568	0.121761617	0.21712723	0.194756869	0.629881705	0.392705035	0.07942932	0.349222133	0.285926381	0.440866897	0.807399121	0.357800302	0.958755325	0.173099416	0.169924336	0.747986063	0.039774413	0.606287847	0.098213065	0.226024104	0.720510216	0.990625059	0.126106348	0.090785543	0.891551074	0.10436286	0.118162989	0.064924879	0.383778342	0.075259877
TCGA-FS-A1ZF	470	1	0.148838003	0.088446541	0.410162055	0.257025349	0.375984331	0.780823814	0.102316404	0.088754653	0.111402181	0.185356507	0.172483873	0.158777877	0.22119214	0.275915952	0.343200013	0.25817796	0.446787088	0.167947296	0.158654991	0.179736957	0.494272616	0.108174399	0.246124573	0.189972604	0.367978699	0.383921303	0.225016116	0.783844269	0.511814121	0.285079037	0.47515297	0.276634551	0.839204074	0.031551308	0.68401388	0.264994952	0.318896736	0.825724606	0.987306786	0.300759303	0.112881021	0.749755859	0.194238779	0.112427289	0.109042654	0.252994975	0.10939069
TCGA-FS-A1ZG	295	1	0.110390415	0.333097452	0.261041669	0.327387186	0.137586336	0.902382117	0.729367649	0.0541631	0.196246207	0.610066115	0.105678662	0.355780727	0.218270136	0.139519127	0.101000476	0.281034008	0.083857178	0.211161205	0.179058365	0.380178884	0.490745457	0.850284333	0.683483691	0.100492442	0.361706372	0.588475002	0.464538137	0.825890627	0.493165292	0.903210631	0.136773796	0.585643282	0.961630163	0.109263982	0.705749836	0.09837154	0.325248902	0.859298342	0.992112617	0.260928893	0.079489942	0.853160278	0.118674408	0.073654436	0.080177505	0.472799493	0.567521779
TCGA-FS-A1ZH	996	1	0.423180286	0.201138116	0.472951511	0.333532645	0.397798751	0.620805236	0.261801039	0.18210683	0.262529348	0.359082233	0.38156355	0.278303806	0.392051039	0.393500532	0.40489047	0.456351205	0.421618361	0.412626208	0.368315884	0.334766878	0.505829311	0.369991916	0.465613193	0.297669215	0.648558032	0.40747648	0.52324028	0.649540342	0.802478766	0.583544221	0.374999117	0.481725382	0.942305711	0.051108554	0.607314735	0.377744347	0.417081518	0.686764956	0.985237317	0.396886131	0.173164806	0.638786994	0.37913523	0.313616592	0.186349184	0.306495989	0.272107051
TCGA-FS-A1ZJ	1441	1	0.132835131	0.11566579	0.645359638	0.273848463	0.278918505	0.812267826	0.144126731	0.078084988	0.111607296	0.273903122	0.862338071	0.166930089	0.511098759	0.240021156	0.248841691	0.370631379	0.720266132	0.196222157	0.22403787	0.241990364	0.286793834	0.231544137	0.424511549	0.248300026	0.355490454	0.198415931	0.398364152	0.733687356	0.522697998	0.9536089	0.267491949	0.193690264	0.925719425	0.049658376	0.571409825	0.323087449	0.733455394	0.79725749	0.986507579	0.182649206	0.098354789	0.812781833	0.212148276	0.197570992	0.135867837	0.258165836	0.144960987
TCGA-FS-A1ZK	728	1	0.130575301	0.124550238	0.161726309	0.176406005	0.229881893	0.859305652	0.056232652	0.054651766	0.06753786	0.278697267	0.10145895	0.207241364	0.240308897	0.153885873	0.209793993	0.304298596	0.458407241	0.233827942	0.244274073	0.189056052	0.28095618	0.123402971	0.665641408	0.173902538	0.495555381	0.536737252	0.508961024	0.766300156	0.73336231	0.927704631	0.71975412	0.231622638	0.6355701	0.106612241	0.709168613	0.191968506	0.221116332	0.668608357	0.98117492	0.089533647	0.103825606	0.783626392	0.155742931	0.125621585	0.075167344	0.423516845	0.123918008
TCGA-FS-A1ZM	3080	0	0.380593571	0.25797742	0.793999493	0.569835316	0.351068419	0.792719043	0.210542299	0.369009488	0.263326347	0.365191369	0.663914537	0.379648409	0.659283222	0.450197756	0.489270947	0.546885058	0.474022147	0.311610257	0.316239775	0.359975579	0.878036005	0.238379255	0.725588868	0.325999907	0.438196491	0.55115083	0.578892266	0.611745185	0.809390793	0.906733838	0.763526161	0.835118397	0.910709801	0.065450997	0.747593148	0.471320672	0.552512593	0.709848061	0.991370856	0.436039893	0.324102745	0.23650193	0.483376174	0.396185461	0.225832717	0.423230946	0.595940374
TCGA-FS-A1ZN	730	1	0.150918962	0.100296631	0.402419961	0.324066987	0.354209106	0.847090503	0.24830785	0.070141233	0.173524938	0.200030159	0.184375981	0.41165913	0.2145679	0.140700398	0.170382585	0.532260404	0.511427588	0.162303701	0.18712306	0.153884485	0.386871546	0.272869564	0.458605547	0.08497264	0.443201514	0.473535884	0.408892596	0.831369686	0.381732092	0.178396689	0.309822358	0.158577865	0.936679834	0.029825919	0.754745475	0.127890721	0.480782955	0.751249521	0.989495799	0.153332311	0.083336466	0.81690829	0.132615772	0.075798785	0.088906127	0.453904178	0.082654997
TCGA-FS-A1ZP	2273	1	0.219395969	0.143807191	0.897113272	0.127256433	0.573564768	0.914743368	0.12705236	0.176579419	0.196554088	0.242652317	0.208166512	0.222117501	0.283484387	0.348569281	0.295913125	0.5262818	0.240957924	0.256501101	0.275983655	0.390015679	0.375561379	0.196909959	0.287447043	0.276835853	0.277421329	0.400568815	0.486523941	0.776002895	0.752113673	0.752673076	0.574486261	0.381654565	0.94548705	0.061306287	0.266573101	0.423771544	0.33977736	0.832833791	0.991205422	0.404852204	0.174747557	0.837671764	0.29692229	0.223863534	0.107480928	0.268208394	0.170471794
TCGA-FS-A1ZR	347	1	0.193799271	0.127000458	0.273246827	0.605035883	0.243085514	0.801557397	0.330377043	0.20534261	0.133489881	0.385464116	0.259199851	0.354759628	0.265595639	0.279439197	0.203420755	0.586216249	0.246253742	0.258597786	0.194895842	0.19841616	0.530492118	0.28843194	0.72594952	0.262139216	0.201764058	0.316120769	0.470387538	0.721215369	0.478202906	0.939373161	0.234455911	0.326318532	0.917524583	0.106789659	0.763525269	0.213271175	0.309827605	0.827626847	0.986903562	0.312277645	0.2364339	0.765708664	0.239369415	0.186736687	0.134916447	0.369250453	0.164792361
TCGA-FS-A1ZS	4526	0	0.162148367	0.328991285	0.850972177	0.549152046	0.338230213	0.560612871	0.159244054	0.487649693	0.882788337	0.367481126	0.563864206	0.099264039	0.514074031	0.226976907	0.880103874	0.624946072	0.188563645	0.45697768	0.298676754	0.204893695	0.83758701	0.332738487	0.730680213	0.188554534	0.583170603	0.703547281	0.43364158	0.828515615	0.89003904	0.939083087	0.797028822	0.928651478	0.946228222	0.036062191	0.820024955	0.6120241	0.33910521	0.776531922	0.991167211	0.3007675	0.709777018	0.318384867	0.195201138	0.071923922	0.125297751	0.213095905	0.119212389
TCGA-FS-A1ZT	1617	0	0.422124575	0.18185844	0.428534095	0.275614447	0.407384695	0.675990952	0.241640954	0.158239304	0.17981263	0.359743549	0.349364245	0.440712221	0.383961423	0.604530525	0.319623472	0.410575569	0.387614448	0.38537631	0.342106366	0.358355472	0.464262448	0.277684834	0.387145857	0.376740051	0.51291856	0.455210768	0.495090878	0.638626667	0.863897115	0.465430244	0.412639938	0.497326647	0.910802638	0.05505963	0.753309196	0.43353174	0.466826677	0.729004643	0.989109751	0.476769067	0.161210506	0.752264058	0.450195324	0.419631613	0.199798122	0.452832686	0.264571956
TCGA-FS-A1ZU	808	1	0.130959502	0.072900906	0.691480906	0.136745484	0.179996472	0.927587617	0.916184491	0.261534856	0.120263335	0.354537536	0.128644788	0.117198286	0.214281824	0.176551557	0.204678863	0.23781106	0.459284135	0.135509981	0.14862433	0.249967723	0.322459432	0.778963769	0.206904482	0.019861906	0.376367194	0.532398445	0.513111612	0.846399045	0.788490386	0.228636301	0.16652893	0.22842483	0.759268661	0.037577801	0.674436266	0.133076179	0.206808461	0.767806984	0.984535364	0.172354684	0.374909097	0.839788951	0.142693574	0.029951797	0.086693662	0.187906254	0.133696956
TCGA-FS-A1ZW	1505	0	0.501956065	0.270752242	0.835921561	0.421844729	0.4460275	0.173639406	0.284470813	0.306900299	0.309649438	0.361510873	0.569485449	0.315974641	0.491817761	0.540120734	0.324193606	0.477868206	0.819012248	0.463127007	0.389324621	0.382622577	0.468900598	0.386912149	0.374455789	0.422043938	0.75757629	0.637419226	0.454563827	0.678833671	0.770030394	0.957330426	0.526120993	0.564207029	0.94521438	0.066512885	0.818586766	0.448644874	0.518160261	0.542949065	0.985919656	0.499688432	0.342308458	0.098112534	0.520914146	0.240146927	0.161386832	0.446245807	0.380898123
TCGA-FS-A1ZY	824	1	0.04893803	0.052174451	0.211137792	0.319822222	0.24927302	0.949883553	0.287373173	0.048170941	0.109512191	0.202297054	0.148163048	0.139726946	0.359646393	0.09183938	0.108709808	0.420068359	0.067884725	0.094824292	0.118439267	0.290836761	0.330722702	0.313526657	0.156757378	0.042488434	0.119206482	0.457400506	0.558419927	0.879844889	0.631058572	0.665525325	0.067092517	0.075433261	0.926759177	0.036752186	0.775356587	0.249765252	0.291919999	0.853338687	0.989684587	0.056884252	0.092262244	0.912003858	0.050631389	0.039833087	0.060874713	0.179508635	0.070973807
TCGA-FS-A1ZZ	822	1	0.190794286	0.088645875	0.316008235	0.148174037	0.150415009	0.738913866	0.059787513	0.068433999	0.270084859	0.120000507	0.876731269	0.2957629	0.191489739	0.16276898	0.151372718	0.430495858	0.686200568	0.152990162	0.129276871	0.163791586	0.506812083	0.09850505	0.399222276	0.151971337	0.299537814	0.495301529	0.428363154	0.644047298	0.560244341	0.184438147	0.154268181	0.544356243	0.949763557	0.034940691	0.698349561	0.12561785	0.196356276	0.661740605	0.986121166	0.13571708	0.106223973	0.128390164	0.141294504	0.132197305	0.127647136	0.260419961	0.413888686
TCGA-FS-A4F0	2367	0	0.753722043	0.400283798	0.88735729	0.736915916	0.450265199	0.110308227	0.77937436	0.817709862	0.934180757	0.467062295	0.858222272	0.196092284	0.875376168	0.923027903	0.317104944	0.692301795	0.797037287	0.653467866	0.40466382	0.384221657	0.869696484	0.82825598	0.707576685	0.019427913	0.907214828	0.778321586	0.808008481	0.433341575	0.676031398	0.853811847	0.951485257	0.949102775	0.959590068	0.242209216	0.800502337	0.87026403	0.184179565	0.578966937	0.98361968	0.392630427	0.843579668	0.468140607	0.910322119	0.5962718	0.068207418	0.266456052	0.893469465
TCGA-FS-A4F2	1525	1	0.236039584	0.084540787	0.307658246	0.149151342	0.263761324	0.798180508	0.085232709	0.047609246	0.057816578	0.098417526	0.173209403	0.170403053	0.365256573	0.255784693	0.330761941	0.190961426	0.289988539	0.202979171	0.207150763	0.283192082	0.408477134	0.096744036	0.726932948	0.117481288	0.56176756	0.562354935	0.407524114	0.55187631	0.732422427	0.724005901	0.262740404	0.452306841	0.753082919	0.034132586	0.734761645	0.165629266	0.344269339	0.702875067	0.988345592	0.332473548	0.086482547	0.310015275	0.289290893	0.065263761	0.08135703	0.243168516	0.319943481
TCGA-FS-A4F4	2028	1	0.339512017	0.172878874	0.454758835	0.243684666	0.32100273	0.761377907	0.1039513	0.127662136	0.184085569	0.399323185	0.273759596	0.361541271	0.24690504	0.360092673	0.288929603	0.337934547	0.243693976	0.267668435	0.145725739	0.316797011	0.412669455	0.180231689	0.65338226	0.303748874	0.379762093	0.361988062	0.313709572	0.671514782	0.271241803	0.723125839	0.502735447	0.356993637	0.869421283	0.052421722	0.467935626	0.374975242	0.515189078	0.660690672	0.987409739	0.387245078	0.157906698	0.689801291	0.322653759	0.251084554	0.145358356	0.388886259	0.622405155
TCGA-FS-A4F5	874	1	0.099009368	0.066220391	0.431019426	0.162589324	0.169117681	0.760430315	0.171293425	0.040786917	0.426521791	0.103053436	0.853602468	0.43076192	0.440068189	0.084142009	0.196080929	0.150322814	0.43185713	0.28482374	0.122029087	0.141555265	0.186297639	0.22602206	0.556354129	0.054637581	0.066243703	0.485837495	0.376491177	0.760644172	0.168479401	0.848352565	0.237266857	0.227720604	0.927880477	0.061439264	0.682923009	0.110979721	0.237840592	0.730261849	0.985775721	0.066142975	0.090785651	0.784925302	0.088130562	0.559685755	0.046872765	0.268713385	0.795225945
TCGA-FS-A4F8	5318	1	0.447129066	0.366972534	0.694979388	0.475703277	0.476748879	0.532198147	0.293980476	0.452215453	0.451040458	0.472692478	0.530913696	0.57941565	0.530770875	0.529353358	0.546395699	0.676359639	0.678734829	0.501655295	0.484751757	0.416873452	0.588803613	0.345294942	0.713164055	0.431040275	0.82821709	0.673545626	0.56588985	0.461961633	0.794797344	0.925338618	0.614223139	0.654148438	0.941483897	0.117267663	0.724504691	0.594714684	0.570115318	0.58711308	0.986438694	0.526690779	0.493753296	0.371668701	0.597684878	0.467118013	0.226386001	0.564638525	0.419164389
TCGA-FS-A4F9	1035	0	0.750512034	0.189153275	0.863079384	0.748494158	0.37859813	0.675124348	0.220808994	0.74294372	0.731968599	0.458280833	0.860386091	0.41362726	0.838305071	0.897705915	0.176448905	0.71894335	0.793505438	0.232528434	0.5257168	0.174138239	0.39904914	0.262170538	0.708110073	0.197148725	0.869530074	0.68483757	0.547458219	0.785550767	0.718432868	0.668828576	0.875331471	0.299491968	0.956135913	0.107074353	0.704837703	0.656290163	0.867194771	0.702258905	0.986918159	0.354679656	0.804576995	0.851608324	0.908407195	0.752933257	0.155096777	0.519558932	0.119104947
TCGA-FS-A4FB	813	1	0.083156682	0.095931815	0.383654009	0.085911406	0.370945374	0.854316018	0.049574279	0.271438094	0.050885761	0.107040115	0.111067439	0.258805615	0.183389064	0.135837647	0.146707371	0.099423323	0.097743614	0.065275262	0.101847175	0.189349583	0.424579082	0.064063585	0.157863014	0.029486089	0.100891754	0.417080493	0.420612277	0.817135534	0.348112474	0.888306446	0.168858665	0.158513692	0.772601607	0.02351673	0.725782173	0.149357237	0.373242793	0.759684097	0.98622061	0.12451261	0.31355063	0.596610059	0.110453082	0.032732488	0.057253942	0.284133755	0.048754976
TCGA-FS-A4FC	1655	1	0.303880415	0.13841776	0.709659355	0.552509406	0.382426121	0.616794088	0.50456164	0.457859937	0.722264043	0.245330641	0.644170366	0.434241626	0.715887018	0.653876732	0.434014353	0.496145587	0.731258287	0.459328876	0.348432299	0.465539108	0.683065342	0.44675772	0.713758125	0.334407204	0.371446947	0.770777331	0.498202339	0.615816744	0.491481551	0.935985464	0.659524001	0.667012969	0.963139694	0.072631434	0.781256691	0.715967449	0.748148732	0.684196755	0.982761316	0.39912135	0.643291173	0.253899059	0.538890746	0.204704019	0.157862494	0.415020368	0.219357891
TCGA-FS-A4FD	2454	1	0.155570839	0.083570377	0.213849362	0.101966705	0.208659805	0.625728574	0.093990293	0.220680999	0.062765424	0.151664746	0.123253499	0.186673615	0.171922366	0.161841622	0.234910965	0.257042805	0.193033794	0.184384943	0.172825751	0.159768753	0.295979698	0.115532914	0.233815473	0.161471706	0.169889414	0.287182332	0.276330675	0.733645375	0.408050452	0.924641246	0.144871188	0.320125282	0.8158337	0.014302041	0.396576741	0.199901513	0.269640034	0.748947586	0.98456017	0.209067387	0.182904377	0.803687898	0.188417696	0.139320266	0.096861784	0.209328869	0.087706971
TCGA-FW-A3TV	411	0	0.358392345	0.238435729	0.425794355	0.281021826	0.471576255	0.53519348	0.208435551	0.237263648	0.277847288	0.327960338	0.431148987	0.433897546	0.477542845	0.5709808	0.492416579	0.334169253	0.468090617	0.456523663	0.353599654	0.415225873	0.441655423	0.239046038	0.395348949	0.408927755	0.369854136	0.442315186	0.450516278	0.627878388	0.516480639	0.70244176	0.465214128	0.528842595	0.954979386	0.083140016	0.549663436	0.447449051	0.407820084	0.665310063	0.984266766	0.513039642	0.201531098	0.569267079	0.565170357	0.330224134	0.200654092	0.460215052	0.276550835
TCGA-GF-A3OT	301	0	0.323653274	0.242896732	0.512845476	0.27227342	0.475442191	0.748488839	0.162010125	0.384261856	0.26051816	0.301185739	0.53159647	0.332757889	0.447130511	0.582581161	0.581873272	0.512242311	0.722404391	0.443571627	0.433173083	0.417607304	0.786191365	0.244794988	0.701147452	0.360663224	0.846675383	0.470872453	0.45571645	0.590857197	0.858842824	0.798241878	0.488610534	0.830810391	0.957160687	0.045160652	0.812669279	0.491936406	0.684285686	0.700877061	0.990506418	0.544791755	0.308747	0.582154517	0.602206889	0.278003868	0.149293303	0.405904757	0.263936854
TCGA-GF-A4EO	591	0	0.490133487	0.419677127	0.723818166	0.501187659	0.58336298	0.283105709	0.322727901	0.394408453	0.455102005	0.46201086	0.663282283	0.615915278	0.773844423	0.671854233	0.519351793	0.501564782	0.629679053	0.579772565	0.573213227	0.492600389	0.765001173	0.4293592	0.720904078	0.464825747	0.803847682	0.641612927	0.61356013	0.494009933	0.630702317	0.93198295	0.625761823	0.748210022	0.911768889	0.133045434	0.80066932	0.573803445	0.705703882	0.494956474	0.988052444	0.614902709	0.402635035	0.056610225	0.654299686	0.532196561	0.237164672	0.610767856	0.57392574
TCGA-GN-A263	467	1	0.384672329	0.624812653	0.441963499	0.232013811	0.432673645	0.786358637	0.129239751	0.163230004	0.280975128	0.239134506	0.271459447	0.30255819	0.535320922	0.402285908	0.485443966	0.436215186	0.407043279	0.399269586	0.34869028	0.350010512	0.585202263	0.179176755	0.444688773	0.39407091	0.485867749	0.693897759	0.398611555	0.569721191	0.528868419	0.935610307	0.391523324	0.530270715	0.945476014	0.050417852	0.813339668	0.574590455	0.499368877	0.65873989	0.98971762	0.448194089	0.154675268	0.568416768	0.43829404	0.231980778	0.157028567	0.31942363	0.248144377
TCGA-GN-A267	1960	1	0.320144902	0.176775089	0.546379372	0.432837641	0.318938175	0.714604837	0.665002339	0.160713118	0.193929784	0.304416014	0.315039671	0.418616637	0.41942518	0.481984341	0.366591237	0.321386181	0.247677723	0.323928393	0.305818969	0.315301136	0.405412019	0.634315215	0.528572864	0.345095699	0.293171211	0.441988084	0.426956727	0.633832284	0.4536366	0.958434454	0.726295376	0.393716036	0.929665046	0.084397828	0.652540865	0.348925081	0.474923561	0.523786216	0.991762993	0.354104095	0.12854228	0.761430104	0.382322195	0.305383349	0.143980455	0.536853795	0.193078629
TCGA-GN-A268	1910	1	0.587683553	0.376873826	0.839075117	0.834800789	0.257556874	0.88091327	0.785964762	0.779019698	0.454889966	0.807182848	0.901392588	0.08092858	0.875875974	0.641564397	0.356584583	0.745866933	0.214178933	0.548801947	0.642257106	0.476083111	0.398646268	0.887589167	0.775192758	0.11791697	0.934600542	0.83317825	0.619415791	0.466524147	0.754385506	0.953967928	0.839939686	0.188644163	0.956380554	0.125435795	0.841518248	0.471407777	0.665062929	0.800704596	0.982497511	0.102239538	0.861856174	0.887447748	0.589709794	0.199308406	0.065156772	0.286102529	0.909418092
TCGA-GN-A269	170	1	0.379091625	0.263258123	0.544812014	0.19429862	0.474488834	0.803909531	0.110017301	0.137852994	0.199197934	0.271456305	0.479919555	0.288342919	0.597468472	0.539901695	0.520068869	0.636242475	0.417060134	0.467065255	0.393698951	0.377814756	0.641792163	0.159503448	0.461240518	0.381758881	0.596752179	0.520287597	0.46333157	0.661776099	0.743803652	0.859150737	0.47298013	0.632069054	0.940606011	0.059834654	0.809627448	0.446391827	0.457627961	0.698199562	0.990040108	0.488264289	0.146851587	0.499718676	0.501353391	0.242584388	0.186138697	0.360969323	0.250468668
TCGA-GN-A26A	988	1	0.332969826	0.177428934	0.691664272	0.270303503	0.373394462	0.54296394	0.125001754	0.14649847	0.1318445	0.230225403	0.295664009	0.332893186	0.397495896	0.537113119	0.493148476	0.411745848	0.662936359	0.364868728	0.350250339	0.303091091	0.684270806	0.173181466	0.627662268	0.313477847	0.469796028	0.485581225	0.418936264	0.682505497	0.791667037	0.949802771	0.411151509	0.541636302	0.953893179	0.046488242	0.799862215	0.402798638	0.456954765	0.814415105	0.992012615	0.442315656	0.430931589	0.143269192	0.478114488	0.222929903	0.124663389	0.355707138	0.165654951
TCGA-GN-A26C	821	1	0.528961042	0.377804563	0.697338045	0.479569901	0.434340253	0.407799113	0.402797199	0.336720789	0.598035663	0.387318448	0.634460038	0.688963925	0.621493054	0.556229884	0.460053017	0.544628149	0.809399821	0.475028963	0.419744306	0.411667662	0.851377445	0.494127042	0.784355545	0.377579045	0.762360446	0.448192909	0.657653488	0.566536407	0.872114812	0.784154154	0.820763289	0.854582881	0.952200612	0.096336041	0.864512096	0.416327731	0.533796682	0.564775151	0.989191365	0.524847102	0.30016144	0.098031544	0.488213574	0.636225949	0.215353629	0.603439858	0.718806592
TCGA-GN-A4U3	3708	0	0.146194064	0.113582973	0.189340816	0.344003707	0.288924986	0.663524175	0.098795707	0.102696863	0.055661559	0.265767099	0.122492054	0.258521407	0.241363521	0.366831037	0.315120292	0.555165861	0.19804849	0.159963646	0.216870969	0.257590369	0.368320244	0.117063302	0.227685618	0.17395651	0.440625612	0.592996486	0.530147525	0.540035775	0.455714907	0.836568376	0.194802529	0.299252182	0.923386308	0.252634578	0.8033591	0.10161891	0.270310211	0.637217936	0.987695808	0.28005894	0.11545506	0.774542775	0.276993206	0.085943363	0.094433789	0.335046317	0.132203009
TCGA-GN-A4U7	317	1	0.119569905	0.263160258	0.154610586	0.121921153	0.200073552	0.917892697	0.341011502	0.029476005	0.144340339	0.133015415	0.098672483	0.097587793	0.192671258	0.344999977	0.19601105	0.360288058	0.157614453	0.133535855	0.145978732	0.346936448	0.258239387	0.496321125	0.408156216	0.081702545	0.129315254	0.295152474	0.222469209	0.511327622	0.43498664	0.875185126	0.131164531	0.228261324	0.913341819	0.068970553	0.707152461	0.108016343	0.619365575	0.840605096	0.98516841	0.219091963	0.06958567	0.561521869	0.24971345	0.068028501	0.065008818	0.20711462	0.838863716
TCGA-GN-A4U9	673	1	0.155283104	0.132729369	0.914043112	0.373651013	0.18113679	0.72228684	0.476761969	0.232968443	0.061524043	0.188263505	0.105042441	0.083987991	0.291473141	0.17339523	0.606313627	0.494884437	0.635861583	0.139048663	0.253372689	0.194779638	0.575625087	0.431526143	0.563107006	0.179664887	0.566604565	0.42757266	0.357420709	0.758843927	0.879650127	0.869873819	0.150814312	0.363965033	0.901451832	0.062527826	0.272003492	0.374373335	0.472088966	0.846852154	0.938760699	0.21082093	0.316820744	0.782102853	0.183153342	0.081120288	0.068353363	0.237035099	0.051719876
TCGA-HR-A2OH	2004	1	0.503510399	0.432112495	0.753474077	0.587345128	0.509154022	0.246964165	0.492439939	0.335086077	0.441791452	0.475353813	0.597510268	0.773785529	0.514131305	0.606087636	0.527559149	0.600512296	0.466666834	0.578788966	0.489491807	0.456121739	0.613132412	0.605919728	0.453967687	0.517928295	0.719806938	0.6386938	0.643095121	0.424563407	0.853695124	0.926867635	0.596428618	0.603914206	0.940455535	0.158308292	0.809910429	0.45218897	0.626290655	0.484535268	0.989907895	0.562211143	0.338223408	0.195049013	0.553481767	0.542733972	0.194385358	0.72507306	0.653741739
TCGA-IH-A3EA	524	0	0.313871819	0.201420623	0.846180806	0.391978989	0.336369585	0.878210696	0.077628008	0.22984167	0.724147425	0.220599	0.701287546	0.235246848	0.839215049	0.351944582	0.342681371	0.614363374	0.806876572	0.294434317	0.261879972	0.651653299	0.41930594	0.185575062	0.738997752	0.253674181	0.917469365	0.730681415	0.503819981	0.778379093	0.69268423	0.681919253	0.305612805	0.410302114	0.948635736	0.09426851	0.838296244	0.293359707	0.298120166	0.758842001	0.983699601	0.385046834	0.271943984	0.614437433	0.404330113	0.272754115	0.119410533	0.285274914	0.723522262
TCGA-QB-A6FS	220	0	0.424403279	0.202939396	0.481099682	0.326775662	0.429673184	0.468335766	0.227723192	0.195374413	0.291964697	0.418454765	0.334201779	0.539651464	0.393910685	0.41520144	0.446962493	0.371643755	0.393778666	0.465933397	0.329113469	0.366677933	0.464890261	0.287912307	0.409733105	0.451253914	0.756264546	0.554717961	0.463974496	0.558240064	0.56437729	0.652172714	0.477959296	0.581414403	0.835907022	0.079885137	0.74584823	0.412658416	0.402875789	0.422854415	0.987609869	0.469144455	0.176728014	0.527923523	0.46482113	0.353575643	0.158530647	0.446106315	0.384757619
TCGA-W3-A824	6940	0	0.347147599	0.687869096	0.890373965	0.71055944	0.683939647	0.711736168	0.853788083	0.470969657	0.617929888	0.72539625	0.498059727	0.598736227	0.803659546	0.413880199	0.639122556	0.824320514	0.870666681	0.586188469	0.536459364	0.344303198	0.547171235	0.750662021	0.746638157	0.384577962	0.894286	0.8259571	0.775506425	0.654860159	0.762190606	0.93280114	0.807674522	0.47067362	0.948857952	0.193020664	0.827204098	0.424357064	0.302853845	0.504866018	0.99029206	0.455403824	0.527229889	0.064781155	0.504334708	0.758571762	0.149709753	0.800722376	0.830117684
TCGA-W3-A825	1917	1	0.266184442	0.151934897	0.400438494	0.233155111	0.286725992	0.731896286	0.186955274	0.171615889	0.12862263	0.271408916	0.385460289	0.175257009	0.33161304	0.420161624	0.292723982	0.431857573	0.691480894	0.238116862	0.324533712	0.228852554	0.362767768	0.294673326	0.327432339	0.375798911	0.486102387	0.312840284	0.36568033	0.620593589	0.750903058	0.896869408	0.360015045	0.413490018	0.953865809	0.051591367	0.313409191	0.310184291	0.400059606	0.729804015	0.876610079	0.453173391	0.144430262	0.721815061	0.3981156	0.332232649	0.158740186	0.306346758	0.211761532
TCGA-W3-A828	3683	1	0.508354948	0.309235471	0.326507695	0.175748032	0.401001092	0.727163342	0.094230053	0.28869993	0.083572724	0.155436345	0.639345668	0.341158502	0.433276273	0.339834811	0.638320483	0.474172895	0.608182992	0.218827294	0.280695169	0.283764236	0.701160373	0.111378918	0.588065781	0.295806727	0.566561	0.546506331	0.338522629	0.667676036	0.849296322	0.911114541	0.325866838	0.573193235	0.931213646	0.04425435	0.622126821	0.256001489	0.513289243	0.73608555	0.987517424	0.391887857	0.259236442	0.650110214	0.321498677	0.120606181	0.137685319	0.325198491	0.135087489
TCGA-W3-AA1R	3379	1	0.285002753	0.114290634	0.732093526	0.484100774	0.330392703	0.442785713	0.433626096	0.124381787	0.155973494	0.245765866	0.526354924	0.119094612	0.299076087	0.270909349	0.188631158	0.422770105	0.753540374	0.36443229	0.21652828	0.313205668	0.352828562	0.751360258	0.495297242	0.334743238	0.678617856	0.352115865	0.392726217	0.334467742	0.616569485	0.604704738	0.710126499	0.478745258	0.93931949	0.076022206	0.737869076	0.195377984	0.825909342	0.639670753	0.958644713	0.348857491	0.112309991	0.496189884	0.303675188	0.194692322	0.127414523	0.256852237	0.754899211
TCGA-W3-AA1V	1280	1	0.236632137	0.385258888	0.791365661	0.351332341	0.288570504	0.868194177	0.192700271	0.161312474	0.306958984	0.19053591	0.832503714	0.170895732	0.586230541	0.335552751	0.187725298	0.193495893	0.73996536	0.789910615	0.531571917	0.619840232	0.30666682	0.159390358	0.784578309	0.231880754	0.905112896	0.491877429	0.301863525	0.557392725	0.940346533	0.844064926	0.291595093	0.351142413	0.898570296	0.03078537	0.745955369	0.283215335	0.735726674	0.684097195	0.987094629	0.392727655	0.162008423	0.090323028	0.296119481	0.094816932	0.134574189	0.306535224	0.654139614
TCGA-W3-AA1W	6666	0	0.442686416	0.642866417	0.893357799	0.652257102	0.633023503	0.472389405	0.521348872	0.580104202	0.776057536	0.658558728	0.783702841	0.668501329	0.870535735	0.648642002	0.722990879	0.863740219	0.874426975	0.816012469	0.75012866	0.731712517	0.885678785	0.603919041	0.775860876	0.467979532	0.916779873	0.870498269	0.77916182	0.44109118	0.899518499	0.947960075	0.846771352	0.962210177	0.935991296	0.150699333	0.858864952	0.764053993	0.769318463	0.61798617	0.988914587	0.97938057	0.598412803	0.048116046	0.711170356	0.625506646	0.178743766	0.832222717	0.75944806
TCGA-W3-AA21	3195	1	0.184461643	0.15355334	0.742167971	0.658946212	0.257420339	0.67276404	0.626651862	0.423081617	0.374729154	0.326104643	0.623268877	0.803889711	0.380071975	0.284453494	0.354390719	0.642495774	0.751791339	0.274733854	0.224284504	0.364881193	0.47899964	0.796389818	0.74258418	0.218208448	0.485557035	0.558166532	0.530637906	0.758278462	0.673797372	0.610903849	0.694769306	0.359894419	0.933578078	0.141294505	0.792442724	0.19898153	0.530803714	0.666367083	0.987682245	0.259455366	0.434863269	0.823785424	0.245832826	0.281683967	0.099353852	0.747627181	0.570452464
TCGA-WE-A8JZ	731	0	0.171779922	0.084188383	0.188058534	0.235956822	0.222370055	0.768890478	0.845953542	0.104409457	0.078800316	0.169036551	0.832526533	0.135752119	0.208047433	0.211168404	0.185605019	0.411762462	0.503675666	0.208612956	0.211737746	0.252946999	0.350770116	0.753602028	0.292643668	0.240310085	0.189806852	0.617612122	0.38562273	0.72086075	0.496388577	0.641764758	0.193872273	0.299534345	0.91657347	0.055517539	0.799376709	0.129716443	0.645088192	0.758096384	0.988224234	0.193151594	0.106487107	0.170603269	0.228588914	0.106945301	0.106131604	0.237974256	0.638133514
TCGA-WE-A8K1	1492	0	0.473507747	0.387574867	0.52253498	0.578637682	0.553987307	0.293177861	0.357459338	0.266985547	0.428608492	0.304107162	0.519148289	0.505850311	0.551826989	0.542916747	0.474894219	0.457622259	0.786157939	0.58669542	0.459811592	0.503699887	0.598242757	0.462844166	0.756000913	0.392728292	0.699993446	0.657938318	0.579949482	0.469621223	0.536994492	0.930010562	0.491426438	0.60049789	0.944596032	0.101969115	0.765657082	0.41954232	0.621480248	0.47561878	0.984958766	0.490226383	0.238172303	0.318733075	0.510094697	0.481804346	0.198829067	0.512335979	0.436581113
TCGA-WE-A8K5	1860	1	0.248620149	0.227445029	0.786998465	0.639084655	0.294362785	0.662397203	0.801050183	0.130950393	0.752135302	0.279316405	0.76701935	0.706348016	0.770525666	0.378319465	0.289091821	0.654338071	0.757841968	0.285554319	0.232961998	0.495592421	0.624631321	0.724942357	0.718752782	0.287278309	0.830749793	0.684618622	0.493353006	0.728503955	0.649408341	0.765465629	0.661128578	0.63516633	0.92073186	0.04528147	0.79317432	0.189278619	0.831452124	0.447515006	0.984636504	0.301864838	0.125247994	0.287871626	0.371734539	0.400642906	0.13975534	0.699025476	0.412789716
TCGA-WE-A8ZO	2057	0	0.301354994	0.153915256	0.858895842	0.363913836	0.26635336	0.350924051	0.118366959	0.129116893	0.731874783	0.274720856	0.812549116	0.340967831	0.520076765	0.317438217	0.21375113	0.408157032	0.689674151	0.296340683	0.272053349	0.715668461	0.306496507	0.207570883	0.524589591	0.29521128	0.280341062	0.684299417	0.359922469	0.684822623	0.5505758	0.794594252	0.359874051	0.336982981	0.935263471	0.04285134	0.701132236	0.277509962	0.85462445	0.492463995	0.986622995	0.36976411	0.135989848	0.126502656	0.367042561	0.288484744	0.131940107	0.344447468	0.284643104
TCGA-WE-A8ZQ	1818	0	0.086310585	0.075874748	0.773067377	0.503033043	0.299135284	0.934186238	0.319073244	0.236541509	0.305954611	0.171892697	0.912680858	0.196487935	0.699382464	0.164554157	0.163411568	0.610634464	0.846511964	0.178589409	0.121830872	0.307394237	0.822603389	0.295068505	0.721947901	0.017957722	0.835971273	0.523455636	0.652402282	0.857779601	0.865006946	0.877932623	0.729369274	0.83737182	0.869151032	0.060957548	0.780767592	0.657548366	0.824819376	0.808289372	0.985963586	0.184681331	0.269821171	0.874781815	0.16611257	0.132741915	0.178666375	0.268800538	0.160153859
TCGA-WE-A8ZR	274	1	0.232548797	0.183236604	0.25777466	0.412456043	0.335421823	0.688804048	0.281882647	0.119898025	0.217776648	0.208703338	0.469258503	0.271681863	0.466383042	0.2624536	0.296999318	0.306564074	0.206901977	0.400418206	0.199841037	0.293826566	0.408436864	0.335121789	0.499358361	0.193975979	0.338253598	0.415664852	0.441045448	0.742759369	0.261109892	0.906982664	0.301127601	0.371189975	0.935651553	0.070660877	0.70628445	0.191793806	0.400073693	0.631516764	0.986146481	0.347937619	0.108251424	0.643972106	0.262637577	0.208784348	0.097331614	0.416135743	0.439172441
TCGA-WE-A8ZT	359	0	0.262278573	0.131443478	0.294545542	0.219796183	0.371330714	0.632201791	0.117269562	0.16311946	0.185671285	0.215053256	0.243882638	0.580104252	0.263031295	0.358254026	0.262572117	0.263785752	0.458397013	0.245782125	0.240810995	0.284238278	0.518131516	0.144048035	0.279372167	0.297172193	0.281318401	0.367953948	0.302082766	0.734254914	0.560603607	0.830732923	0.322755775	0.32280553	0.936692022	0.036773045	0.800314777	0.213416017	0.439391992	0.623233082	0.98507205	0.357729405	0.125599975	0.758496139	0.338743909	0.180234691	0.110138898	0.583842526	0.161022646
TCGA-WE-AA9Y	370	0	0.305581602	0.300498527	0.551837272	0.378101345	0.377872903	0.579414477	0.314800097	0.351473963	0.394795964	0.300927743	0.316709755	0.364913736	0.512036292	0.436744214	0.676812723	0.504928029	0.465191273	0.410071738	0.335184878	0.364698095	0.617499358	0.303438727	0.445455711	0.39945418	0.551513322	0.612516792	0.467030133	0.625414928	0.814400216	0.931221646	0.440787854	0.716640144	0.947383689	0.078814507	0.710572691	0.498577635	0.627954734	0.682206025	0.986461675	0.484324858	0.403811111	0.441781718	0.434869977	0.232255109	0.122394528	0.401035159	0.382667509
TCGA-WE-AAA0	1065	0	0.328683202	0.192223788	0.450180424	0.348185201	0.348762812	0.277075318	0.382626703	0.149312826	0.281902091	0.327030312	0.380770818	0.676231656	0.358098904	0.434664347	0.388196611	0.354835662	0.748907066	0.389580547	0.348976178	0.320703003	0.505734695	0.478616283	0.667938322	0.371697942	0.64755108	0.551247609	0.45199019	0.429310822	0.527619979	0.476666863	0.434808571	0.566422673	0.945509473	0.063971821	0.713699316	0.308068228	0.749586109	0.374871862	0.988496279	0.490942962	0.169552574	0.093304162	0.417942971	0.384142752	0.160163748	0.486608068	0.688912853
TCGA-WE-AAA3	600	0	0.257485527	0.168077424	0.516154135	0.264881006	0.286212895	0.722656946	0.502676602	0.237609907	0.209709326	0.305835048	0.605298974	0.568482639	0.285057972	0.417187463	0.367166558	0.395551009	0.383318634	0.254977724	0.202100033	0.54278736	0.415632379	0.480019923	0.305525897	0.340835966	0.354419903	0.445051219	0.346215682	0.599740032	0.492965657	0.504842396	0.521580377	0.468145831	0.947862018	0.184341269	0.680871324	0.352348954	0.758144952	0.673819202	0.986740788	0.580187317	0.215657731	0.666713126	0.400780718	0.263380982	0.158028511	0.498861245	0.260989132
TCGA-XV-A9W2	417	0	0.211084924	0.158718158	0.318871823	0.223271603	0.35554343	0.411878071	0.076927376	0.252308261	0.124027352	0.173634461	0.550618448	0.317848269	0.662582012	0.425597885	0.419632737	0.458442513	0.721543697	0.308094988	0.203524201	0.286837589	0.685539345	0.150969275	0.464495781	0.215765725	0.583832218	0.452968852	0.377795736	0.748073382	0.759861686	0.831811295	0.556506452	0.717370062	0.880605372	0.030934093	0.721549209	0.305138486	0.363157715	0.688219606	0.981058415	0.422700087	0.277088328	0.423448063	0.390992153	0.072642326	0.087928742	0.373997737	0.254677561
TCGA-XV-AAZV	412	0	0.301507433	0.289005242	0.375351152	0.358387453	0.33040858	0.676352557	0.486888999	0.198271961	0.179914715	0.371458954	0.3827257	0.490422909	0.364649265	0.607058351	0.487082505	0.345829552	0.377442793	0.352104475	0.346280183	0.335320754	0.452860009	0.426021287	0.537923177	0.391989169	0.840030717	0.565932787	0.376869349	0.462716725	0.612632187	0.736687875	0.407097458	0.636340659	0.895128934	0.078377879	0.567550436	0.468620251	0.586198363	0.619018644	0.988832058	0.45777294	0.162183172	0.472516654	0.531253238	0.291290535	0.168778992	0.539117181	0.317306139
TCGA-XV-AAZW	393	1	0.138099982	0.167860325	0.426777196	0.218374451	0.225976971	0.900282147	0.092807753	0.132128731	0.209638132	0.212848737	0.273527542	0.351872451	0.336189121	0.112508172	0.235692182	0.240288403	0.78026043	0.11225269	0.187485912	0.350879302	0.729615359	0.157990085	0.335111741	0.056533125	0.445593466	0.734394723	0.459637839	0.822033482	0.78568535	0.286548194	0.502902142	0.562490919	0.90284242	0.091101017	0.750475978	0.144533295	0.77066464	0.798702767	0.991258265	0.148110469	0.09549048	0.789225967	0.10659631	0.188764347	0.100911049	0.369436311	0.234448632
TCGA-XV-AAZY	405	0	0.300587278	0.362263463	0.807280904	0.371960998	0.408970911	0.564901854	0.092965827	0.173217962	0.333846019	0.314168823	0.617900627	0.480226712	0.436575319	0.459713041	0.3656939	0.429451934	0.525464111	0.347991492	0.298922759	0.350385811	0.418782505	0.216014975	0.566373223	0.444116104	0.711806737	0.539132242	0.522341836	0.355187842	0.458517598	0.598052234	0.604761304	0.531873386	0.877114846	0.06388523	0.76235706	0.425334519	0.463374842	0.536733976	0.989766214	0.521005178	0.113177098	0.40278952	0.483224076	0.508339403	0.216014829	0.435681438	0.272113522
TCGA-YG-AA3N	306	0	0.388571609	0.296151632	0.5637688	0.597915597	0.358533641	0.657528575	0.482617465	0.242649595	0.580031627	0.4692078	0.647688602	0.365846795	0.453893716	0.436106497	0.322181352	0.724150115	0.486747771	0.458517077	0.341703079	0.355036205	0.441611579	0.487552749	0.695648208	0.437224621	0.891865035	0.552950136	0.634097492	0.530871073	0.38261604	0.834036928	0.458791795	0.531829825	0.948072905	0.111939197	0.822128488	0.300730796	0.700550435	0.552749899	0.986534354	0.50876757	0.240336708	0.494303689	0.509064978	0.410946928	0.178223802	0.473403077	0.470103036
TCGA-YG-AA3P	439	0	0.07509627	0.053233597	0.64364114	0.067961888	0.119186899	0.932690727	0.045055713	0.564656255	0.076383867	0.363725665	0.063616352	0.093228635	0.480957325	0.101923456	0.115761691	0.56574055	0.084288672	0.303669407	0.090186531	0.128693373	0.192132074	0.085662309	0.428747529	0.122809081	0.160471377	0.39624535	0.211554103	0.842885305	0.60224172	0.93497396	0.541659752	0.128800716	0.875729538	0.023882557	0.705037244	0.363314461	0.145173373	0.764579667	0.989488102	0.173789062	0.579949647	0.85470103	0.141923569	0.186880313	0.052426801	0.132850088	0.304547184
TCGA-Z2-A8RT	839	0	0.296084191	0.130899313	0.466570722	0.469193564	0.341821409	0.487007279	0.354079407	0.166622625	0.190329084	0.246298743	0.779824994	0.47305463	0.295356836	0.339701303	0.251460178	0.436362352	0.500316779	0.274886487	0.248765439	0.276073579	0.310259121	0.37921699	0.441336067	0.257406744	0.346893874	0.573172299	0.512552907	0.699948431	0.612205098	0.931770798	0.388787457	0.355534503	0.709202235	0.044082762	0.813649662	0.24466474	0.658235176	0.575065931	0.987093208	0.352550522	0.177691085	0.43334153	0.345677653	0.276052221	0.130367214	0.48929803	0.315706109
TCGA-Z2-AA3S	2950	0	0.226234761	0.117218262	0.880401344	0.231119373	0.236081351	0.673256179	0.904777612	0.11248302	0.178216437	0.297314211	0.828803454	0.439776182	0.663775861	0.260534604	0.153863855	0.661848131	0.789593421	0.184041854	0.164831892	0.492894981	0.322014219	0.673088852	0.179197647	0.276641667	0.440674134	0.160055301	0.467636328	0.74200667	0.576729	0.855220198	0.278330276	0.290874026	0.909668049	0.045861804	0.634316279	0.181661114	0.348465759	0.717810757	0.98492737	0.763294313	0.085825464	0.761911888	0.324354723	0.222276095	0.132896236	0.432958489	0.114289121
TCGA-Z2-AA3V	486	0	0.425059744	0.233772481	0.52003941	0.268354833	0.495556158	0.530766672	0.221778028	0.227491692	0.451811713	0.299204964	0.47201889	0.439594882	0.434216044	0.420272854	0.425805819	0.433683845	0.407643111	0.515347269	0.397497944	0.382080268	0.551199217	0.348542761	0.620573872	0.459569451	0.572545356	0.427442342	0.409671792	0.459002802	0.462490715	0.88910418	0.505391581	0.657626905	0.939241546	0.109032594	0.622435556	0.304589394	0.486827283	0.571121212	0.987950771	0.514658515	0.178849	0.465265824	0.428170804	0.367706221	0.224167758	0.435395313	0.344877196
[truncated: 209 more columns]
