# Supplementary material for: Identification of Melanoma Subsets Based on DNA Methylation Sites and Construction of a Prognosis Evaluation Model
Source: J Oncol. 2022 Oct 11;2022:6608650. doi: 10.1155/2022/6608650 (PMC9578801; doi:10.1155/2022/6608650)
Supplement: Supplementary Materials — Supplementary Table 1. Prognosis-related methylation sites by univariate Cox regression analysis (783 sites were found, P < 0.0001). Supplementary Table 2. Multivariate Cox regression analysis of the 783 methylation sites (256 sites were found, P < 0.0001). Supplementary Table 3. Level of the 256 sites in 338 samples and the follow-up. Supplementary Table 4. Analysis of differences in methylation site levels between the 7 clusters. Supplementary Table 5. Risk assessment. Supplementary Table 6. Testing the prediction model in 60% of the samples (randomly) for 100 times. Supplementary Table 7. Functional enrichment analysis of genes and 28 pathways were observed. Supplementary Table 8. The correlation coefficients between the expression levels of the 35 hub genes (∗∗P < 0.01, ∗P < 0.05). Supplementary Table 9. The correlation coefficients of the critical genes validated in the testing group (∗∗P < 0.01). Figure S1. The clinical features in different DNA methylation subgroups. The clinical T categories (a), N stage (b), and M status (c) of different subtypes. The tumor stage (d), patient ages (e), and gender (f) in different subtypes. C, cluster; T, primary tumor; N, lymph node involvement; M, distant metastases. [file 6608650.f1.zip › Supplementary Table 4.Analysis of differences in methylation site levels between the 7 clusters.txt]

Supplementary Table 4.Analysis of differences in methylation site levels between the 7 clusters
cluster1						cluster2						cluster3						cluster4						cluster5						cluster6						cluster7
gene	conMean	treatMean	logFC	pValue	fdr	gene	conMean	treatMean	logFC	pValue	fdr	gene	conMean	treatMean	logFC	pValue	fdr	gene	conMean	treatMean	logFC	pValue	fdr	gene	conMean	treatMean	logFC	pValue	fdr	gene	conMean	treatMean	logFC	pValue	fdr	gene	conMean	treatMean	logFC	pValue	fdr
cg00089550	0.305906035	0.38021568	0.313729459	6.34585E-06	2.2563E-05	cg00089550	0.353232905	0.167103286	-1.079879638	1.58E-20	5.17E-20	cg00089550	0.292289107	0.467732987	0.678289115	3.81E-21	1.15E-20	cg00089550	0.332618073	0.255830398	-0.378678862	0.000261614	0.0004556	cg00089550	0.317505256	0.400139589	0.333722898	0.178329699	0.221126423	cg00089550	0.331416533	0.21413481	-0.630126234	1.64E-05	0.000200417	cg00089550	0.321732636	0.325591814	0.017202142	0.812688771	0.889095408
cg00119073	0.222354693	0.281608656	0.340828822	2.96917E-07	1.61725E-06	cg00119073	0.260389198	0.110181781	-1.240783915	9.19E-22	4.13E-21	cg00119073	0.203064133	0.392103039	0.949297382	1.99E-25	1.82E-24	cg00119073	0.246457177	0.164177351	-0.586081879	1.35E-05	3.18E-05	cg00119073	0.232767613	0.278991622	0.261331457	0.360619831	0.406690205	cg00119073	0.239027959	0.193200391	-0.307081369	0.024263807	0.05219777	cg00119073	0.242942245	0.199588017	-0.283588274	0.093943729	0.226882967
cg00244517	0.5242771	0.551326306	0.072576908	0.191963746	0.225425316	cg00244517	0.572050078	0.31993265	-0.838373217	7.82E-16	1.46E-15	cg00244517	0.491647233	0.71677802	0.543902875	2.72E-13	3.69E-13	cg00244517	0.551203582	0.394037798	-0.484251235	1.52E-06	5.88E-06	cg00244517	0.513083987	0.803682132	0.647430008	9.28E-09	2.28E-07	cg00244517	0.518629999	0.670068872	0.369603731	0.000852997	0.003729038	cg00244517	0.543092717	0.46842051	-0.213394269	0.015561253	0.057734504
cg00394658	0.37137662	0.390507958	0.072468956	0.136666515	0.164256468	cg00394658	0.4050924	0.227215911	-0.834187153	3.43E-14	5.36E-14	cg00394658	0.354903972	0.475638546	0.422436917	5.00E-10	5.98E-10	cg00394658	0.390670424	0.277638083	-0.492746567	5.98E-06	1.65E-05	cg00394658	0.358235779	0.652058506	0.864091982	6.61E-10	1.01E-07	cg00394658	0.363709609	0.518567308	0.511744217	5.51E-05	0.000427738	cg00394658	0.387917348	0.316263628	-0.294621647	0.00252831	0.015941109
cg00491548	0.347575132	0.408677543	0.233638103	4.63111E-07	2.27993E-06	cg00491548	0.390554855	0.212975118	-0.874840307	1.23E-22	7.89E-22	cg00491548	0.323456777	0.543020313	0.747433227	8.70E-29	7.43E-27	cg00491548	0.371636292	0.292747601	-0.344234047	8.26E-06	2.16E-05	cg00491548	0.360401269	0.372773604	0.048695618	0.665079672	0.703555355	cg00491548	0.368816019	0.268941448	-0.455609205	4.49E-05	0.000410425	cg00491548	0.363193544	0.351187644	-0.04849647	0.687453551	0.839343321
cg00533183	0.644201758	0.529055014	-0.28409485	1.29784E-05	4.15308E-05	cg00533183	0.597390145	0.725717276	0.280734176	8.83E-07	9.54E-07	cg00533183	0.649936246	0.467621373	-0.474957337	4.72E-11	5.90E-11	cg00533183	0.60225743	0.725394701	0.268385921	0.000203593	0.000356985	cg00533183	0.611408844	0.733808811	0.263266807	0.005275076	0.010153531	cg00533183	0.61210636	0.69719247	0.18777463	0.033894659	0.068865339	cg00533183	0.617454554	0.624429541	0.016205835	0.955848316	0.963374681
cg00549475	0.300394893	0.292195318	-0.039927229	0.193795259	0.226536924	cg00549475	0.323178984	0.17467915	-0.887625971	3.34E-13	4.83E-13	cg00549475	0.27951735	0.390580136	0.482680747	1.74E-08	1.99E-08	cg00549475	0.313768926	0.199649119	-0.652235778	0.00010516	0.000200902	cg00549475	0.288044669	0.466015054	0.694084003	0.005012148	0.009866688	cg00549475	0.27957003	0.526640635	0.913609133	1.69E-06	5.42E-05	cg00549475	0.308383918	0.251224289	-0.29575158	0.124858611	0.275550038
cg00622799	0.235142031	0.275975831	0.231009481	0.000863359	0.001768159	cg00622799	0.267624919	0.126255615	-1.083864902	4.51E-15	7.90E-15	cg00622799	0.218391509	0.368808949	0.755956899	1.12E-15	1.80E-15	cg00622799	0.25448395	0.177260985	-0.521699632	0.000497969	0.000844238	cg00622799	0.230981713	0.454417846	0.97624086	4.45E-05	0.000135741	cg00622799	0.248501306	0.192620542	-0.367491869	0.039527363	0.0778385	cg00622799	0.254402343	0.194963542	-0.383907594	0.055415861	0.149331163
cg00637477	0.29901976	0.310031906	0.052175871	0.020256375	0.029297356	cg00637477	0.330235078	0.156576747	-1.0766234	2.66E-14	4.23E-14	cg00637477	0.264559133	0.47962125	0.858305356	5.40E-17	9.53E-17	cg00637477	0.323957313	0.155002157	-1.063515432	1.17E-10	9.44E-09	cg00637477	0.282924144	0.596235598	1.075467214	2.28E-07	2.34E-06	cg00637477	0.303289647	0.279546925	-0.117605773	0.924277532	0.955805854	cg00637477	0.307166973	0.273928232	-0.165225142	0.427455392	0.643697532
cg00666746	0.308442668	0.337241463	0.12877957	0.006408161	0.010515956	cg00666746	0.336679226	0.204821247	-0.717009329	1.10E-14	1.84E-14	cg00666746	0.285260059	0.457598535	0.681804674	4.69E-23	2.07E-22	cg00666746	0.327459754	0.232618305	-0.493352975	2.61E-07	1.55E-06	cg00666746	0.308456262	0.416222013	0.432287334	0.017237682	0.028842135	cg00666746	0.317116135	0.287434518	-0.141777959	0.278756282	0.383664561	cg00666746	0.319890629	0.290416474	-0.139455436	0.175082049	0.355722258
cg00730561	0.481435113	0.483308653	0.005603456	0.917843213	0.940960234	cg00730561	0.514222263	0.318837599	-0.689570301	1.91E-08	2.21E-08	cg00730561	0.457782847	0.598041151	0.385581355	1.61E-05	1.72E-05	cg00730561	0.506785478	0.319498637	-0.665565411	5.33E-07	2.68E-06	cg00730561	0.465123796	0.74781083	0.685058613	1.60E-07	1.86E-06	cg00730561	0.461846893	0.721898204	0.644380752	4.61E-08	5.90E-06	cg00730561	0.488901607	0.447812654	-0.12664885	0.199760266	0.381631554
cg00754357	0.386856418	0.445876651	0.204846446	0.011130218	0.017164674	cg00754357	0.440495029	0.195792652	-1.169799114	7.83E-18	1.71E-17	cg00754357	0.354953272	0.617190875	0.798087621	1.26E-18	2.55E-18	cg00754357	0.421897091	0.257069756	-0.714731252	6.38E-07	3.02E-06	cg00754357	0.398505723	0.422958336	0.08591511	0.984001027	0.984001027	cg00754357	0.390117642	0.517972405	0.408965998	0.002011672	0.006959296	cg00754357	0.406059987	0.3704688	-0.132340826	0.419758128	0.635846631
cg00835193	0.49089015	0.505193939	0.041437111	0.225888399	0.262851955	cg00835193	0.52643977	0.331029278	-0.669309659	2.73E-13	4.00E-13	cg00835193	0.464206761	0.638202788	0.459247376	2.32E-12	3.02E-12	cg00835193	0.499563837	0.458254461	-0.12452012	0.059083631	0.071684405	cg00835193	0.478752197	0.737522817	0.623408577	1.52E-07	1.85E-06	cg00835193	0.49116882	0.528807044	0.106522415	0.261519296	0.369883645	cg00835193	0.50915656	0.421203758	-0.27359103	0.000428464	0.004361902
cg00851518	0.381338703	0.489323648	0.359716046	2.70655E-08	3.29942E-07	cg00851518	0.448089503	0.189823439	-1.239128786	9.94E-25	1.47E-23	cg00851518	0.366215801	0.593981521	0.697724009	2.52E-22	9.78E-22	cg00851518	0.420340713	0.307367186	-0.451596045	2.87E-06	9.76E-06	cg00851518	0.397665894	0.526679907	0.405369587	0.043807861	0.063360523	cg00851518	0.417927916	0.253763172	-0.719771419	6.82E-07	2.52E-05	cg00851518	0.402654566	0.418070242	0.054202666	0.457265777	0.656525518
cg00933835	0.382905018	0.459107355	0.261844979	2.03207E-05	6.19298E-05	cg00933835	0.435992228	0.217629695	-1.002426998	6.67E-22	3.05E-21	cg00933835	0.363228384	0.576433168	0.666276405	8.35E-20	2.06E-19	cg00933835	0.404740387	0.367736397	-0.13832484	0.094665122	0.111678669	cg00933835	0.397203534	0.441317367	0.151938061	0.500598942	0.550014288	cg00933835	0.408885922	0.290948597	-0.490934104	0.000194827	0.001133537	cg00933835	0.403544954	0.381801453	-0.079906801	0.547424245	0.723671955
cg01024247	0.474464875	0.496293974	0.064893649	0.171808922	0.202687023	cg01024247	0.508579684	0.331907844	-0.615691109	6.99E-14	1.05E-13	cg01024247	0.448461692	0.628224766	0.486296063	1.00E-15	1.64E-15	cg01024247	0.485873474	0.436564051	-0.154387334	0.065520205	0.079118738	cg01024247	0.466770117	0.67867065	0.53999942	2.09E-07	2.23E-06	cg01024247	0.474117995	0.541595995	0.191970919	0.033544869	0.068699891	cg01024247	0.498379339	0.387243024	-0.364005012	1.60E-07	8.20E-06
cg01220257	0.483044664	0.53555209	0.14887031	0.078136411	0.099024362	cg01220257	0.528446129	0.324738303	-0.702478846	6.74E-10	8.33E-10	cg01220257	0.467461106	0.62617317	0.421715362	1.76E-07	1.95E-07	cg01220257	0.505193162	0.426345707	-0.244811383	0.016671566	0.021886774	cg01220257	0.482671427	0.685881979	0.506918924	2.28E-05	7.65E-05	cg01220257	0.493617254	0.50763731	0.040405282	0.652589714	0.7576865	cg01220257	0.502755579	0.455786059	-0.141500388	0.058690735	0.154895136
cg01328833	0.345483064	0.417786184	0.274149794	1.23816E-06	5.3186E-06	cg01328833	0.3987222	0.17422052	-1.194469379	1.09E-24	1.47E-23	cg01328833	0.315901205	0.581787452	0.881018743	2.05E-27	6.76E-26	cg01328833	0.377896799	0.254938833	-0.56784115	8.65E-08	6.92E-07	cg01328833	0.356457563	0.442125221	0.310724702	0.06023196	0.084701181	cg01328833	0.36627827	0.304507288	-0.266463356	0.066795376	0.119577737	cg01328833	0.368092595	0.329829018	-0.158350395	0.2571636	0.458282718
cg01341487	0.304791895	0.374079539	0.295520518	3.0595E-08	3.40536E-07	cg01341487	0.351030216	0.164744875	-1.091361636	1.64E-25	3.24E-24	cg01341487	0.284041566	0.49456199	0.8000493	6.51E-27	1.39E-25	cg01341487	0.330361922	0.253782019	-0.380457552	6.94E-05	0.000136674	cg01341487	0.316157118	0.383913526	0.280139691	0.121996761	0.16015985	cg01341487	0.328425233	0.221060045	-0.571126685	1.37E-05	0.000184992	cg01341487	0.32432963	0.300067887	-0.112171899	0.389794238	0.614751781
cg01613691	0.352157215	0.38596602	0.132254198	0.003206985	0.005623207	cg01613691	0.385051334	0.231791483	-0.732223237	3.52E-18	8.04E-18	cg01613691	0.332767991	0.489478649	0.556729263	3.04E-21	9.49E-21	cg01613691	0.371723993	0.281103758	-0.403129072	2.97E-08	2.61E-07	cg01613691	0.357216042	0.39850489	0.157800558	0.270062108	0.318598615	cg01613691	0.359296999	0.364005207	0.018782201	0.98749999	0.98749999	cg01613691	0.358576566	0.364885529	0.025162729	0.877387728	0.928145695
cg01768328	0.512093408	0.599976587	0.228499216	2.15744E-05	6.4977E-05	cg01768328	0.570704834	0.334643699	-0.77011893	3.91E-20	1.21E-19	cg01768328	0.495740309	0.704681443	0.507386654	2.95E-16	4.96E-16	cg01768328	0.530139441	0.541065648	0.029431771	0.727086363	0.738627417	cg01768328	0.529529261	0.564425267	0.092072166	0.586584329	0.639002503	cg01768328	0.537668804	0.458697827	-0.229173694	0.015429804	0.034956017	cg01768328	0.543472921	0.474248144	-0.196566027	0.006182456	0.03013163
cg02025583	0.341358736	0.356266845	0.061669556	0.072000913	0.09262429	cg02025583	0.372741655	0.203289542	-0.874640057	1.08E-14	1.84E-14	cg02025583	0.32348478	0.446924528	0.466333389	1.21E-09	1.41E-09	cg02025583	0.361394975	0.235747409	-0.616334531	5.44E-06	1.57E-05	cg02025583	0.334760283	0.50217955	0.585074908	0.003104065	0.006513448	cg02025583	0.33018009	0.518506658	0.651109387	2.37E-05	0.000252641	cg02025583	0.350568742	0.316174365	-0.148976965	0.237268747	0.436984167
cg02055253	0.52801297	0.560860545	0.087068727	0.334781361	0.375894862	cg02055253	0.56802473	0.370517467	-0.616412188	3.49E-13	5.02E-13	cg02055253	0.511736284	0.649065388	0.342963297	3.26E-09	3.76E-09	cg02055253	0.546693804	0.461125946	-0.245572181	0.000604886	0.001005086	cg02055253	0.525920518	0.684461368	0.380124333	1.05E-05	4.03E-05	cg02055253	0.529668509	0.602899126	0.186826902	0.021870118	0.047852567	cg02055253	0.53776637	0.523402903	-0.039057613	0.272986376	0.478661044
cg02160608	0.276677262	0.386933549	0.483881739	7.03354E-11	6.00196E-09	cg02160608	0.334858359	0.131358553	-1.35004084	2.33E-22	1.24E-21	cg02160608	0.27122842	0.445554803	0.716094538	5.44E-26	6.33E-25	cg02160608	0.311432258	0.234144099	-0.411521705	4.59E-06	1.41E-05	cg02160608	0.304598113	0.246196801	-0.307094991	0.050911311	0.072811708	cg02160608	0.309452417	0.201422378	-0.619493621	1.04E-05	0.00014789	cg02160608	0.296127414	0.32535276	0.135786735	0.741422153	0.846225338
cg02285386	0.521628559	0.636601127	0.287366854	9.68704E-05	0.000233951	cg02285386	0.597592628	0.293076327	-1.027885909	1.04E-18	2.55E-18	cg02285386	0.501490798	0.767516756	0.613975018	7.85E-17	1.38E-16	cg02285386	0.561253426	0.455247591	-0.302000962	0.001530222	0.002290859	cg02285386	0.533997829	0.756104291	0.501751365	1.86E-05	6.53E-05	cg02285386	0.549598573	0.517640028	-0.086429077	0.455185812	0.574027427	cg02285386	0.563357853	0.468848216	-0.26493069	0.001298591	0.009498267
cg02290550	0.526565944	0.564512195	0.100390531	0.033504917	0.045143467	cg02290550	0.560088986	0.408574352	-0.455057415	1.18E-11	1.55E-11	cg02290550	0.507415538	0.668084606	0.396863118	3.01E-15	4.73E-15	cg02290550	0.540984772	0.495927102	-0.125459916	0.040385552	0.049705294	cg02290550	0.522755584	0.729449113	0.480670771	5.76E-09	1.90E-07	cg02290550	0.538010207	0.49869513	-0.109475427	0.212744163	0.310562931	cg02290550	0.549425931	0.465275812	-0.239838815	8.16E-06	0.000160737
cg02335376	0.475060557	0.500186175	0.074353753	0.053890455	0.070748495	cg02335376	0.504675147	0.359580326	-0.489040954	1.02E-12	1.44E-12	cg02335376	0.449062211	0.633059838	0.495426549	1.03E-21	3.57E-21	cg02335376	0.488125571	0.43186883	-0.176659136	0.002475344	0.003560046	cg02335376	0.472802325	0.605187512	0.356145088	9.05E-06	3.66E-05	cg02335376	0.481047077	0.475700058	-0.016125887	0.977502044	0.981335385	cg02335376	0.493835647	0.416912216	-0.244287333	2.12E-06	5.43E-05
cg02374486	0.644556619	0.566490977	-0.186254117	1.53547E-06	6.23935E-06	cg02374486	0.605680519	0.735773352	0.280704417	4.49E-12	6.09E-12	cg02374486	0.656821601	0.484399409	-0.43930447	3.02E-17	5.41E-17	cg02374486	0.620364318	0.671965971	0.115272466	0.014564629	0.019318886	cg02374486	0.626405431	0.640414346	0.031908905	0.359381729	0.406690205	cg02374486	0.617702544	0.741616167	0.263760422	9.53E-06	0.000143547	cg02374486	0.621835974	0.653295542	0.071201714	0.311510525	0.517835678
cg02576938	0.605686931	0.670900078	0.147525629	0.017605599	0.025608145	cg02576938	0.653384237	0.452835962	-0.528943115	2.94E-11	3.82E-11	cg02576938	0.594866387	0.742251388	0.319342225	3.15E-08	3.57E-08	cg02576938	0.621911542	0.608735266	-0.030894443	0.647566119	0.663107706	cg02576938	0.61477845	0.70568108	0.198949736	0.055558905	0.07858055	cg02576938	0.62065289	0.614210279	-0.015053988	0.835346145	0.894764072	cg02576938	0.6292967	0.576036081	-0.127581197	0.025742798	0.083419698
cg02608453	0.738004579	0.843366746	0.192530369	0.005669298	0.009485884	cg02608453	0.794934856	0.592430017	-0.424191898	1.03E-05	1.08E-05	cg02608453	0.733743747	0.894818298	0.286318455	2.57E-08	2.93E-08	cg02608453	0.77560583	0.668782268	-0.213787052	0.003270105	0.004625122	cg02608453	0.755342178	0.857444888	0.182913598	0.10891986	0.144474011	cg02608453	0.770662232	0.650042073	-0.245565593	0.008003682	0.020824787	cg02608453	0.758833007	0.773697732	0.027987611	0.45637266	0.656525518
cg02717339	0.449076857	0.495805651	0.142812342	0.016548712	0.024488267	cg02717339	0.506761052	0.221178937	-1.196091648	1.35E-22	8.22E-22	cg02717339	0.419708026	0.651282586	0.633897602	5.05E-18	9.64E-18	cg02717339	0.480919195	0.319629177	-0.5893954	1.14E-08	1.49E-07	cg02717339	0.445527436	0.680745634	0.611601549	8.38E-06	3.52E-05	cg02717339	0.454871818	0.514331927	0.177239659	0.239982308	0.343214921	cg02717339	0.459702465	0.458205985	-0.004704099	0.901887263	0.935961322
cg02736280	0.49652931	0.632034788	0.348125086	2.44918E-08	3.29942E-07	cg02736280	0.576446996	0.275567228	-1.064783634	9.59E-23	6.29E-22	cg02736280	0.48447184	0.72996039	0.591405369	5.97E-18	1.12E-17	cg02736280	0.529443226	0.508065615	-0.059461159	0.26030923	0.284782748	cg02736280	0.527225542	0.516604767	-0.029359311	0.593095483	0.643357812	cg02736280	0.536061872	0.413019762	-0.376188711	0.001914879	0.006715191	cg02736280	0.532520137	0.498003094	-0.096681375	0.119859182	0.269157462
cg02737321	0.906355581	0.916906141	0.016696902	0.373010386	0.416989776	cg02737321	0.915444881	0.874714679	-0.065660519	2.00E-05	2.10E-05	cg02737321	0.903554676	0.933520158	0.04706927	0.000173224	0.000181744	cg02737321	0.909622068	0.90267139	-0.011066374	0.017980608	0.023484876	cg02737321	0.906251765	0.947570856	0.064321926	3.20E-07	3.15E-06	cg02737321	0.908604338	0.909804813	0.001904874	0.820695578	0.886489738	cg02737321	0.911152523	0.896840895	-0.022840511	0.078559645	0.195255039
cg02774856	0.076469198	0.07919733	0.050573051	0.016129982	0.024007416	cg02774856	0.084058281	0.041906494	-1.004216139	1.22E-16	2.37E-16	cg02774856	0.068966691	0.116215955	0.752836487	1.23E-18	2.50E-18	cg02774856	0.080444003	0.055135691	-0.544998344	6.76E-06	1.84E-05	cg02774856	0.073580842	0.132624563	0.849945911	3.05E-05	9.63E-05	cg02774856	0.075686223	0.093734513	0.30854963	0.057173307	0.105297602	cg02774856	0.08070637	0.059541645	-0.438783456	0.0013953	0.009803198
cg02851047	0.714631802	0.750137213	0.069954395	0.030196111	0.041118109	cg02851047	0.736471789	0.652203757	-0.175307511	1.69E-07	1.86E-07	cg02851047	0.70768097	0.794099714	0.166221052	1.58E-10	1.92E-10	cg02851047	0.729481519	0.677119334	-0.107461314	0.029436734	0.036760019	cg02851047	0.717003509	0.810066957	0.176060981	2.56E-06	1.46E-05	cg02851047	0.720880613	0.742065529	0.041786242	0.935899765	0.961764376	cg02851047	0.731453206	0.679337194	-0.106637728	5.30E-06	0.000113139
cg02865595	0.352688372	0.433810794	0.298671938	2.01774E-06	8.07097E-06	cg02865595	0.40680758	0.188805605	-1.107444968	5.94E-20	1.75E-19	cg02865595	0.326047034	0.586201413	0.84631635	8.36E-24	4.28E-23	cg02865595	0.386432063	0.268183489	-0.526994382	1.38E-05	3.18E-05	cg02865595	0.362140842	0.506603191	0.484305272	0.01235229	0.021222726	cg02865595	0.379814512	0.261181684	-0.540241301	0.000527081	0.002498752	cg02865595	0.378927321	0.330917267	-0.195450595	0.140040432	0.293855334
cg03000846	0.486208717	0.548111489	0.172893617	0.003017759	0.005364906	cg03000846	0.533839548	0.329258959	-0.697183492	1.67E-14	2.72E-14	cg03000846	0.478901862	0.601529876	0.328906347	3.18E-08	3.59E-08	cg03000846	0.509109902	0.440267838	-0.20959567	0.003151039	0.004481478	cg03000846	0.496526236	0.554295549	0.15878547	0.216817863	0.259370901	cg03000846	0.498206628	0.520799464	0.063983747	0.618333815	0.729462934	cg03000846	0.495979807	0.519084626	0.065688375	0.763839224	0.85764404
cg03154077	0.659436497	0.603011158	-0.129049037	4.09731E-05	0.000115265	cg03154077	0.634358103	0.71015447	0.162835379	3.01E-07	3.28E-07	cg03154077	0.662375979	0.572282092	-0.210923892	1.64E-10	1.99E-10	cg03154077	0.636616206	0.713979712	0.165459196	3.06E-06	1.01E-05	cg03154077	0.642707334	0.713835171	0.151429051	0.001628835	0.003594671	cg03154077	0.647598382	0.638728473	-0.019896617	0.882918474	0.926340694	cg03154077	0.647141355	0.645828555	-0.002929644	0.83336801	0.903992418
cg03241502	0.983194832	0.98778929	0.006725994	0.084449446	0.105975776	cg03241502	0.986276179	0.973831342	-0.018319756	0.015133667	0.015496875	cg03241502	0.983456206	0.987874134	0.006466428	0.022855724	0.023498255	cg03241502	0.984174516	0.984473433	0.000438115	0.357987039	0.381852842	cg03241502	0.984052847	0.986781619	0.003995048	0.629483771	0.67323763	cg03241502	0.984087587	0.985735014	0.002413147	0.040132018	0.078425928	cg03241502	0.984219639	0.984188598	-4.55E-05	0.391423985	0.614751781
cg03331514	0.378302345	0.470053863	0.313286363	1.8543E-08	2.94812E-07	cg03331514	0.437180308	0.204691245	-1.094779023	1.52E-22	8.83E-22	cg03331514	0.355451765	0.607259695	0.772659817	2.11E-27	6.76E-26	cg03331514	0.411193588	0.317063009	-0.375048194	1.60E-05	3.66E-05	cg03331514	0.401084099	0.36014066	-0.155344282	0.131375577	0.168160738	cg03331514	0.407867957	0.288182843	-0.501117723	2.62E-05	0.000268533	cg03331514	0.396075765	0.411143833	0.053866759	0.693983517	0.839343321
cg03339910	0.245701121	0.281387547	0.195654043	0.001347272	0.002653089	cg03339910	0.275980558	0.141016847	-0.968699106	3.68E-15	6.50E-15	cg03339910	0.232077043	0.357618773	0.623818653	6.80E-13	9.07E-13	cg03339910	0.262234516	0.19752773	-0.40880239	0.005678071	0.007899925	cg03339910	0.237326684	0.512678777	1.111180858	6.94E-06	3.06E-05	cg03339910	0.256828305	0.215116532	-0.25568581	0.074600348	0.131708201	cg03339910	0.265993755	0.193882921	-0.456206656	0.043339405	0.129010321
cg03520342	0.534243006	0.367285614	-0.540593728	2.62469E-08	3.29942E-07	cg03520342	0.467219987	0.648148128	0.472221574	2.03E-08	2.33E-08	cg03520342	0.535326972	0.313116885	-0.773719034	4.23E-11	5.31E-11	cg03520342	0.491292363	0.53563709	0.12467405	0.275162141	0.298480967	cg03520342	0.486403121	0.668806953	0.45943736	0.000764386	0.001795254	cg03520342	0.484357378	0.651262676	0.427167631	0.000552196	0.002570222	cg03520342	0.487200476	0.545451694	0.162935893	0.095989202	0.22752996
cg03750567	0.368409848	0.474233265	0.364285238	3.78742E-08	3.87832E-07	cg03750567	0.434488357	0.177385146	-1.29243231	5.59E-25	1.00E-23	cg03750567	0.353140883	0.578962714	0.713226586	6.88E-23	2.98E-22	cg03750567	0.407624624	0.289450444	-0.493924836	1.73E-06	6.51E-06	cg03750567	0.380827534	0.567806453	0.576261456	0.000535967	0.001306738	cg03750567	0.403431132	0.25341429	-0.670824537	4.51E-06	8.33E-05	cg03750567	0.393039539	0.386348513	-0.024771609	0.728075128	0.846225338
cg03835987	0.283882517	0.340798412	0.263624608	0.00088437	0.001796815	cg03835987	0.333400319	0.110751658	-1.589927193	1.99E-19	5.48E-19	cg03835987	0.250548867	0.518401728	1.048978516	1.99E-23	9.42E-23	cg03835987	0.320226028	0.142105705	-1.172126101	1.84E-10	9.44E-09	cg03835987	0.287974813	0.432249621	0.585922065	0.012188639	0.021222726	cg03835987	0.2961313	0.301077585	0.023898315	0.939223023	0.961764376	cg03835987	0.30248943	0.267654183	-0.176514531	0.528906914	0.70778799
cg03880841	0.13819902	0.171072195	0.307857913	1.24919E-07	8.83483E-07	cg03880841	0.158043083	0.082296563	-0.941413814	1.33E-22	8.22E-22	cg03880841	0.132683337	0.207334871	0.643975575	1.52E-20	4.18E-20	cg03880841	0.150270698	0.114387608	-0.393632952	5.20E-06	1.53E-05	cg03880841	0.146990007	0.121696737	-0.272427585	0.034833209	0.053397015	cg03880841	0.148300653	0.111805885	-0.40752883	0.000367068	0.001842539	cg03880841	0.142688481	0.159034174	0.156467937	0.013318066	0.051657953
cg03950476	0.425604174	0.466103351	0.131137585	0.027079058	0.037471562	cg03950476	0.466935451	0.271711642	-0.781146745	4.58E-17	9.17E-17	cg03950476	0.403207814	0.586094156	0.539608853	2.63E-17	4.78E-17	cg03950476	0.45076278	0.329292321	-0.452999528	1.08E-06	4.77E-06	cg03950476	0.431405192	0.485239903	0.169654655	0.428648214	0.477104099	cg03950476	0.426514415	0.531505831	0.317491018	0.003775661	0.011645412	cg03950476	0.437532744	0.420387597	-0.057670885	0.443094169	0.656525518
cg04020309	0.361625017	0.390191511	0.109687902	0.04014043	0.053520573	cg04020309	0.401303969	0.200071852	-1.004177214	4.31E-13	6.12E-13	cg04020309	0.32931778	0.554530421	0.751786203	1.71E-13	2.37E-13	cg04020309	0.395102542	0.19125996	-1.046692251	5.88E-10	2.00E-08	cg04020309	0.358019798	0.526072363	0.555221894	0.005275076	0.010153531	cg04020309	0.35712549	0.49802269	0.479780363	0.01779256	0.039607786	cg04020309	0.373956739	0.339032001	-0.141449928	0.743654366	0.846225338
cg04177132	0.174350194	0.241000131	0.467045959	4.49072E-10	2.87406E-08	cg04177132	0.209708211	0.085560629	-1.293364359	2.77E-23	2.19E-22	cg04177132	0.168671882	0.287947999	0.771588806	5.50E-22	2.01E-21	cg04177132	0.197181734	0.136774727	-0.527724236	5.32E-06	1.55E-05	cg04177132	0.191530879	0.151114572	-0.341934219	0.040466691	0.059881347	cg04177132	0.194280177	0.127449834	-0.608209212	8.34E-05	0.000592789	cg04177132	0.185922281	0.204670207	0.138601436	0.145268937	0.302348357
cg04247135	0.347997123	0.442958402	0.348095845	9.1042E-08	6.85493E-07	cg04247135	0.403533305	0.195513063	-1.045422747	2.95E-21	1.13E-20	cg04247135	0.329544126	0.55987531	0.764633904	4.79E-24	2.73E-23	cg04247135	0.385162398	0.264278681	-0.543406816	2.92E-07	1.66E-06	cg04247135	0.369270025	0.36586278	-0.013373504	0.701447108	0.732940652	cg04247135	0.3736724	0.313820564	-0.251834116	0.036431589	0.073436903	cg04247135	0.371473252	0.357458842	-0.055481194	0.742537988	0.846225338
cg04357965	0.333638469	0.369440672	0.147057057	0.002432899	0.004448729	cg04357965	0.37588061	0.168868496	-1.154374293	6.36E-18	1.41E-17	cg04357965	0.295691298	0.563127662	0.929370233	5.09E-24	2.77E-23	cg04357965	0.364461261	0.192618183	-0.920021578	1.02E-10	9.44E-09	cg04357965	0.327790493	0.560879559	0.774916994	1.17E-05	4.42E-05	cg04357965	0.343001366	0.324559294	-0.07973225	0.764357583	0.85399875	cg04357965	0.350535863	0.298360797	-0.232504065	0.099275377	0.233160519
cg04638014	0.312650876	0.290156636	-0.107720636	0.143870709	0.172107017	cg04638014	0.343507176	0.127141151	-1.433909183	1.35E-15	2.47E-15	cg04638014	0.264622784	0.515423249	0.961820331	5.24E-15	8.03E-15	cg04638014	0.334653374	0.131899766	-1.343225551	7.02E-10	2.00E-08	cg04638014	0.281983718	0.715905284	1.344156864	1.58E-09	1.01E-07	cg04638014	0.29277376	0.486289036	0.732027807	0.001020314	0.004176883	cg04638014	0.327404681	0.21233823	-0.624710805	0.035976238	0.109641867
cg04650656	0.705961931	0.805834579	0.190893325	0.001584046	0.003026237	cg04650656	0.763615123	0.549394939	-0.475002054	1.40E-09	1.69E-09	cg04650656	0.69958419	0.86589669	0.307697221	2.06E-11	2.61E-11	cg04650656	0.732425461	0.700109363	-0.065101642	0.213634407	0.236400925	cg04650656	0.72870354	0.718892786	-0.019555372	0.864191529	0.884932125	cg04650656	0.733550143	0.662997564	-0.145892017	0.016621529	0.037325539	cg04650656	0.730522971	0.716537061	-0.027888312	0.132280877	0.283009652
cg04661436	0.378052884	0.432744579	0.194927688	0.01673107	0.024564658	cg04661436	0.421772944	0.231138961	-0.867706089	8.11E-11	1.03E-10	cg04661436	0.363105198	0.520936147	0.520718967	3.70E-08	4.15E-08	cg04661436	0.400014759	0.3262095	-0.294254432	0.027538123	0.034557644	cg04661436	0.377717997	0.588471441	0.639662877	0.000595193	0.001437447	cg04661436	0.386898488	0.429670142	0.151274436	0.394633442	0.506617132	cg04661436	0.404407864	0.321543967	-0.33079503	0.012462485	0.050266804
cg04803153	0.296164727	0.3620453	0.289770393	5.81474E-05	0.000150361	cg04803153	0.34216249	0.152766048	-1.163357673	6.38E-17	1.27E-16	cg04803153	0.254692639	0.581565204	1.191183686	3.34E-24	2.13E-23	cg04803153	0.333238043	0.164577203	-1.0177886	4.94E-07	2.58E-06	cg04803153	0.307474088	0.363398047	0.241085832	0.328132356	0.381826741	cg04803153	0.320240227	0.197298844	-0.698772044	0.000990469	0.00415672	cg04803153	0.318724225	0.272447204	-0.226331991	0.927653665	0.947146598
cg04833514	0.745467265	0.794333046	0.091599021	0.160341528	0.190034404	cg04833514	0.784094341	0.616397588	-0.347166031	1.57E-11	2.05E-11	cg04833514	0.734233851	0.862886049	0.232930422	3.58E-13	4.83E-13	cg04833514	0.767919302	0.680722528	-0.173887855	1.05E-05	2.69E-05	cg04833514	0.749862992	0.858821892	0.195731944	0.000185394	0.000499587	cg04833514	0.753684642	0.787817725	0.063900881	0.270497334	0.378400642	cg04833514	0.758688738	0.744827974	-0.026600865	0.187120862	0.370431504
cg04966159	0.560777812	0.614908786	0.132943152	0.027452846	0.037784562	cg04966159	0.6043967	0.413622393	-0.547181492	4.45E-11	5.72E-11	cg04966159	0.541943745	0.721697839	0.41325183	1.94E-13	2.65E-13	cg04966159	0.581226766	0.517850689	-0.166564954	0.012991932	0.01741327	cg04966159	0.560570129	0.767071117	0.45246547	1.41E-06	1.00E-05	cg04966159	0.578690486	0.501972765	-0.205182833	0.030533371	0.064070024	cg04966159	0.581555296	0.530469665	-0.13264612	0.011175691	0.048491132
cg04993257	0.306347199	0.352456367	0.202277008	5.15827E-05	0.000137554	cg04993257	0.343661565	0.18019606	-0.931421046	4.22E-21	1.54E-20	cg04993257	0.290253963	0.443662607	0.612147199	1.02E-19	2.45E-19	cg04993257	0.32856313	0.238545416	-0.46190663	5.04E-06	1.52E-05	cg04993257	0.304514882	0.508390413	0.739424089	0.000109783	0.000312272	cg04993257	0.320541484	0.269022987	-0.252781632	0.051672597	0.097266065	cg04993257	0.321980671	0.290499191	-0.148439937	0.236098953	0.436984167
cg05044414	0.364556071	0.447083267	0.294402823	1.24655E-06	5.3186E-06	cg05044414	0.415347256	0.21931367	-0.921322281	3.25E-18	7.57E-18	cg05044414	0.342635571	0.577095376	0.752134839	4.12E-22	1.55E-21	cg05044414	0.396092463	0.296764447	-0.416518983	6.71E-05	0.000133065	cg05044414	0.380048922	0.427696729	0.170403034	0.373147672	0.418972824	cg05044414	0.387646706	0.325527665	-0.251962251	0.024132383	0.05219777	cg05044414	0.391629987	0.340570609	-0.2015373	0.071790592	0.181964274
cg05064489	0.702075552	0.711703069	0.019649166	0.651663373	0.689362906	cg05064489	0.729316261	0.57779312	-0.335991537	1.36E-06	1.46E-06	cg05064489	0.684670961	0.798547092	0.221966665	4.53E-05	4.80E-05	cg05064489	0.7150183	0.633849743	-0.173839284	0.002475344	0.003560046	cg05064489	0.695092809	0.849204352	0.288906143	1.44E-05	5.33E-05	cg05064489	0.691184683	0.860537669	0.316167098	2.07E-08	5.31E-06	cg05064489	0.714039932	0.656765851	-0.120625644	0.005674933	0.029534673
cg05087067	0.473532288	0.493389974	0.0592656	0.12872944	0.156183586	cg05087067	0.51055752	0.313678912	-0.702784965	1.33E-12	1.85E-12	cg05087067	0.442763726	0.647748217	0.548896108	3.81E-15	5.91E-15	cg05087067	0.493458515	0.376886551	-0.388798489	1.27E-05	3.10E-05	cg05087067	0.465149683	0.681282026	0.550557101	7.26E-06	3.15E-05	cg05087067	0.474833109	0.51520422	0.117723876	0.438958135	0.55630338	cg05087067	0.486144674	0.438322949	-0.149391501	0.049492783	0.140779472
cg05210373	0.400356752	0.455975573	0.187670402	0.005979484	0.009939921	cg05210373	0.44804997	0.234676829	-0.93298424	1.05E-14	1.81E-14	cg05210373	0.376437639	0.587749221	0.642789835	2.61E-16	4.42E-16	cg05210373	0.424865131	0.333478012	-0.349413303	0.001871485	0.002753449	cg05210373	0.396423982	0.671458372	0.760253718	1.44E-07	1.85E-06	cg05210373	0.418992692	0.337164383	-0.313472939	0.025065455	0.05347297	cg05210373	0.423683847	0.359664081	-0.236338041	0.012462485	0.050266804
cg05361406	0.24907783	0.310493416	0.317966059	1.60054E-07	9.99363E-07	cg05361406	0.287774351	0.136466226	-1.076394072	2.58E-22	1.35E-21	cg05361406	0.233145098	0.405411176	0.798157765	2.62E-24	1.76E-23	cg05361406	0.270581659	0.211423321	-0.355929529	0.002033293	0.002974417	cg05361406	0.262971719	0.25847345	-0.024891558	0.413666735	0.462439668	cg05361406	0.265932486	0.223982307	-0.247675252	0.004115575	0.012542706	cg05361406	0.267678648	0.238697485	-0.165318701	0.295554437	0.501072422
cg05666287	0.353657476	0.447475092	0.339454622	2.50857E-06	9.73022E-06	cg05666287	0.415894711	0.165897133	-1.325929382	1.47E-22	8.77E-22	cg05666287	0.325487932	0.610964259	0.90848393	8.83E-23	3.70E-22	cg05666287	0.393542817	0.250322281	-0.652733897	1.23E-06	5.27E-06	cg05666287	0.370009345	0.445478808	0.267795092	0.086538136	0.117803792	cg05666287	0.384736895	0.251332184	-0.614276761	0.000480011	0.002318544	cg05666287	0.374983978	0.372017828	-0.011457195	0.697257077	0.839343321
cg05708497	0.558214966	0.569308479	0.028389782	0.675974856	0.71213812	cg05708497	0.580655122	0.460070133	-0.335827733	5.72E-09	6.78E-09	cg05708497	0.53935632	0.663601763	0.29907903	1.22E-12	1.60E-12	cg05708497	0.568427649	0.510208236	-0.155890545	0.001760438	0.002620187	cg05708497	0.55115164	0.712122516	0.369676162	9.28E-09	2.28E-07	cg05708497	0.561032628	0.556403533	-0.011953095	0.871389988	0.918007559	cg05708497	0.566497423	0.53257575	-0.089082653	0.01309944	0.05159164
cg05937445	0.554294143	0.562131141	0.020254975	0.836555183	0.863540834	cg05937445	0.580620536	0.43221793	-0.425836676	9.18E-12	1.22E-11	cg05937445	0.530661479	0.678516918	0.354592962	8.99E-14	1.29E-13	cg05937445	0.564889658	0.498367231	-0.180759879	0.005371972	0.00751489	cg05937445	0.547812689	0.68673801	0.326077134	5.24E-05	0.000155869	cg05937445	0.552012851	0.604276379	0.130506695	0.076316736	0.133815646	cg05937445	0.562823187	0.523253498	-0.105171714	0.025450251	0.083419698
cg05949660	0.392511354	0.465553804	0.246213523	3.3617E-05	9.66961E-05	cg05949660	0.441949967	0.241377333	-0.872592846	1.06E-18	2.60E-18	cg05949660	0.378767093	0.553314401	0.546788476	3.31E-19	7.50E-19	cg05949660	0.417173533	0.353670585	-0.238241394	0.000623405	0.001023024	cg05949660	0.403536773	0.491116371	0.283364766	0.043807861	0.063360523	cg05949660	0.411357663	0.377055015	-0.125618284	0.282481431	0.386712548	cg05949660	0.414524412	0.380692862	-0.122829547	0.024969064	0.083014031
cg06311355	0.466927925	0.519023853	0.152600968	1.9368E-05	6.0466E-05	cg06311355	0.509205935	0.323799281	-0.653149453	6.47E-21	2.21E-20	cg06311355	0.445756864	0.636498471	0.513900033	9.64E-23	3.98E-22	cg06311355	0.487820523	0.417720446	-0.223812695	0.000102363	0.000197029	cg06311355	0.469489869	0.621552752	0.404782813	1.51E-05	5.43E-05	cg06311355	0.483332431	0.420350568	-0.201422781	0.012811132	0.030940093	cg06311355	0.486193035	0.441289371	-0.139804229	0.006523698	0.03092716
cg06414073	0.162876059	0.205977164	0.338709837	6.09159E-08	5.23722E-07	cg06414073	0.192822009	0.069801508	-1.465939623	8.99E-27	6.37E-25	cg06414073	0.146311467	0.298577244	1.029061372	1.86E-28	1.19E-26	cg06414073	0.180462782	0.12020213	-0.586238864	1.25E-05	3.10E-05	cg06414073	0.169580848	0.217899065	0.361686758	0.066965118	0.092665244	cg06414073	0.178512495	0.09956894	-0.84225738	2.22E-06	5.68E-05	cg06414073	0.175109005	0.159554645	-0.134202668	0.736964265	0.846225338
cg06707910	0.267565053	0.317684782	0.247706285	3.83103E-07	2.04322E-06	cg06707910	0.295998072	0.191509129	-0.628174614	2.17E-15	3.91E-15	cg06707910	0.253801729	0.398818678	0.65203108	4.76E-22	1.77E-21	cg06707910	0.288438898	0.215186009	-0.422681457	1.37E-05	3.18E-05	cg06707910	0.281378173	0.235885432	-0.254424094	0.004588852	0.00924997	cg06707910	0.281569655	0.244085974	-0.206102462	0.007155584	0.019081557	cg06707910	0.280105956	0.271832758	-0.043253334	0.868084078	0.925818027
cg06759518	0.342155269	0.410328935	0.262129725	1.96E-07	1.16688E-06	cg06759518	0.388775033	0.198695476	-0.968376545	8.33E-26	2.13E-24	cg06759518	0.3240976	0.517485824	0.675091004	7.53E-24	4.01E-23	cg06759518	0.36475651	0.308618857	-0.241107509	0.003671487	0.005164289	cg06759518	0.352218349	0.437803543	0.313813559	0.02150341	0.034621842	cg06759518	0.365063169	0.263915281	-0.468071233	3.39E-05	0.000333843	cg06759518	0.362219683	0.333448182	-0.119402361	0.181268051	0.362536102
cg06885782	0.378364582	0.407800195	0.108085416	0.009686897	0.01530769	cg06885782	0.421421022	0.200967348	-1.06830116	1.81E-19	5.04E-19	cg06885782	0.348958428	0.55838862	0.678214366	3.33E-18	6.51E-18	cg06885782	0.400238264	0.285001966	-0.489887229	2.17E-06	7.93E-06	cg06885782	0.367193146	0.666373962	0.859792899	3.59E-08	6.21E-07	cg06885782	0.382178096	0.417512836	0.127575457	0.347740839	0.458874509	cg06885782	0.397262955	0.325194348	-0.288792084	0.012566701	0.050266804
cg07005444	0.309684571	0.354055425	0.193175716	0.00171237	0.003247162	cg07005444	0.34755653	0.178397458	-0.962152591	2.84E-19	7.57E-19	cg07005444	0.289743298	0.463328888	0.677261345	1.37E-22	5.47E-22	cg07005444	0.332178687	0.237174304	-0.486011798	5.33E-07	2.68E-06	cg07005444	0.314163909	0.404853797	0.365883553	0.009423803	0.017232097	cg07005444	0.322070445	0.289046928	-0.156072538	0.127016437	0.204504452	cg07005444	0.320366535	0.315492572	-0.022117413	0.678783139	0.839343321
cg07156249	0.416800365	0.211087277	-0.98151692	1.39175E-09	6.83903E-08	cg07156249	0.331282177	0.571936926	0.787795464	1.30E-09	1.59E-09	cg07156249	0.411336365	0.177169994	-1.215184334	3.04E-11	3.84E-11	cg07156249	0.361907675	0.431357626	0.253262758	0.036845717	0.045788852	cg07156249	0.357413436	0.589628458	0.722212288	0.000247343	0.000659581	cg07156249	0.359949285	0.505610194	0.490231899	0.004512493	0.013278141	cg07156249	0.366019288	0.39594209	0.113369763	0.249192251	0.45566583
cg07343703	0.448956341	0.532857385	0.247174301	0.001170783	0.002341566	cg07343703	0.510138722	0.253226819	-1.010459406	3.97E-16	7.59E-16	cg07343703	0.417154801	0.710973746	0.769213436	3.29E-20	8.35E-20	cg07343703	0.491515292	0.311685357	-0.657145925	1.58E-07	1.02E-06	cg07343703	0.459062388	0.602899105	0.393226353	0.010873395	0.019197166	cg07343703	0.463575854	0.515544434	0.153291354	0.19347499	0.286298251	cg07343703	0.481676648	0.399488969	-0.269909316	0.010804228	0.047687629
cg07497569	0.662274697	0.714564631	0.109634765	0.010960923	0.017109734	cg07497569	0.706130393	0.511461104	-0.465310085	1.11E-16	2.19E-16	cg07497569	0.642740984	0.824191677	0.358742428	2.28E-18	4.53E-18	cg07497569	0.676145763	0.659108534	-0.036818245	0.455954516	0.478378508	cg07497569	0.666444617	0.792060224	0.24912514	0.000154977	0.000422066	cg07497569	0.675538795	0.653941873	-0.046876219	0.316513311	0.422017747	cg07497569	0.687645942	0.607409122	-0.178997359	1.32E-05	0.000242153
cg07621169	0.482180908	0.553336745	0.198583201	0.010835458	0.017017651	cg07621169	0.531779245	0.327715849	-0.698382025	1.03E-09	1.26E-09	cg07621169	0.455314929	0.703890595	0.628486444	3.67E-16	6.11E-16	cg07621169	0.493795238	0.525151778	0.088821523	0.397846078	0.422608282	cg07621169	0.492421233	0.586194123	0.251485533	0.048712432	0.07005833	cg07621169	0.506807644	0.391917302	-0.370889019	0.006720112	0.018301582	cg07621169	0.522227001	0.380866802	-0.455390511	5.24E-07	2.23E-05
cg07664173	0.115443707	0.130791359	0.180077695	6.22461E-05	0.000157772	cg07664173	0.129306127	0.066191409	-0.96607476	2.25E-19	6.07E-19	cg07664173	0.101733015	0.201479358	0.985844095	2.93E-25	2.42E-24	cg07664173	0.124636174	0.081169952	-0.618705188	8.42E-07	3.78E-06	cg07664173	0.117291205	0.143622178	0.292183704	0.689243388	0.723140604	cg07664173	0.120601909	0.097817358	-0.30209034	0.138868752	0.218100617	cg07664173	0.122393629	0.101738458	-0.266663329	0.491922511	0.680714393
cg07695566	0.463372474	0.499615008	0.108644471	0.129405075	0.156262733	cg07695566	0.507611976	0.289134088	-0.811987402	2.67E-12	3.70E-12	cg07695566	0.437548908	0.634903309	0.537092609	1.96E-13	2.67E-13	cg07695566	0.484553916	0.385861977	-0.328572315	0.000875265	0.001366267	cg07695566	0.457238047	0.696819365	0.607839263	2.56E-06	1.46E-05	cg07695566	0.474865266	0.430004746	-0.143165651	0.152750836	0.236995236	cg07695566	0.474883307	0.454668279	-0.062758692	0.289462404	0.500691725
cg07808761	0.377235544	0.424310702	0.16965545	0.003179307	0.005613121	cg07808761	0.421972759	0.2149988	-0.972821263	2.93E-17	6.10E-17	cg07808761	0.342809264	0.60430443	0.81786942	7.99E-24	4.17E-23	cg07808761	0.403192335	0.286686592	-0.491993777	7.95E-06	2.10E-05	cg07808761	0.381400878	0.487538579	0.354208219	0.03799541	0.057210219	cg07808761	0.3928976	0.325084604	-0.273338121	0.051422107	0.097266065	cg07808761	0.392917001	0.362405009	-0.116621698	0.379301791	0.614564927
cg07839457	0.488371015	0.326321715	-0.581682582	2.57467E-07	1.4647E-06	cg07839457	0.424522625	0.592862951	0.481857198	2.19E-06	2.33E-06	cg07839457	0.481874476	0.310187109	-0.635518656	9.47E-07	1.03E-06	cg07839457	0.436454513	0.556322958	0.350091336	0.00121188	0.001835747	cg07839457	0.437869785	0.683655695	0.642768032	1.80E-05	6.42E-05	cg07839457	0.444236169	0.550539266	0.309518606	0.040539465	0.078621992	cg07839457	0.459596336	0.417736749	-0.137773232	0.255925853	0.458282718
cg07871024	0.730812313	0.791838234	0.115704788	0.051920598	0.068513779	cg07871024	0.775780882	0.586094592	-0.404515698	3.73E-13	5.33E-13	cg07871024	0.724194683	0.841672323	0.216881093	1.06E-10	1.30E-10	cg07871024	0.746073371	0.733155737	-0.025197827	0.338621069	0.362707086	cg07871024	0.737357988	0.855583289	0.214543085	1.46E-05	5.33E-05	cg07871024	0.740956777	0.785115063	0.083514718	0.361861339	0.470236055	cg07871024	0.755510089	0.690494498	-0.129821102	8.41E-05	0.001140456
cg08100069	0.408842603	0.44075605	0.108434835	0.098311829	0.121583711	cg08100069	0.451772317	0.235402052	-0.940468977	8.37E-19	2.10E-18	cg08100069	0.386707011	0.556971469	0.526362506	2.71E-15	4.28E-15	cg08100069	0.430316797	0.322210819	-0.417394218	2.25E-05	4.92E-05	cg08100069	0.399676486	0.674259299	0.754470817	8.02E-10	1.01E-07	cg08100069	0.411040397	0.4745271	0.207210295	0.063748056	0.115741151	cg08100069	0.424521219	0.374420122	-0.181178698	0.019781655	0.072344338
cg08100159	0.743014752	0.878188737	0.241140177	0.00511327	0.008726647	cg08100159	0.828981649	0.491146605	-0.755186439	2.02E-15	3.66E-15	cg08100159	0.737362627	0.945094817	0.358084779	8.79E-17	1.52E-16	cg08100159	0.765623195	0.821098638	0.100921004	0.549800988	0.569834222	cg08100159	0.764801693	0.903504837	0.240446609	0.000359347	0.000919929	cg08100159	0.771375849	0.792606539	0.039170891	0.833715381	0.894764072	cg08100159	0.799325607	0.64596319	-0.307331352	5.64E-10	7.22E-08
cg08157684	0.143838984	0.189103074	0.394718077	1.34697E-08	2.78003E-07	cg08157684	0.170620069	0.069598641	-1.293656313	4.18E-22	1.98E-21	cg08157684	0.131307067	0.262869046	1.001399704	5.01E-24	2.77E-23	cg08157684	0.162565675	0.097347569	-0.739805823	4.73E-07	2.52E-06	cg08157684	0.152380823	0.177764094	0.222282596	0.331645335	0.384168352	cg08157684	0.159065008	0.091696188	-0.794682831	2.20E-05	0.000252641	cg08157684	0.155881009	0.144236224	-0.112011645	0.92648061	0.947146598
cg08310837	0.341972702	0.336955077	-0.0213249	0.948729876	0.96378908	cg08310837	0.362964605	0.229543441	-0.661061663	6.31E-10	7.84E-10	cg08310837	0.320338345	0.439926118	0.457664754	5.06E-11	6.29E-11	cg08310837	0.352873515	0.262633588	-0.426099716	3.32E-05	7.08E-05	cg08310837	0.329346583	0.523911895	0.669717635	8.86E-07	7.18E-06	cg08310837	0.334920929	0.412120054	0.299244135	0.012962463	0.031012996	cg08310837	0.345191604	0.319944866	-0.109574057	0.101721236	0.234600329
cg08345719	0.438404518	0.492898387	0.169027594	0.00015406	0.000352137	cg08345719	0.482814713	0.287750326	-0.746652075	7.41E-19	1.90E-18	cg08345719	0.418861552	0.603216084	0.526201436	2.03E-20	5.37E-20	cg08345719	0.465530966	0.352604317	-0.400826996	2.66E-08	2.45E-07	cg08345719	0.437597646	0.655585803	0.583179636	6.53E-08	8.79E-07	cg08345719	0.454021545	0.408194048	-0.153505614	0.123924631	0.202068188	cg08345719	0.455928164	0.42427382	-0.103810872	0.049151565	0.140779472
cg08397758	0.225072823	0.269129149	0.25790679	4.2176E-05	0.000117359	cg08397758	0.261237641	0.101961144	-1.357343319	1.28E-17	2.72E-17	cg08397758	0.200450416	0.400909002	1.000029399	1.50E-19	3.48E-19	cg08397758	0.246051279	0.16190698	-0.60379383	0.000116303	0.000217326	cg08397758	0.229391737	0.321613312	0.487513694	0.192421051	0.232357495	cg08397758	0.239438146	0.179774504	-0.413464583	0.01414874	0.032631329	cg08397758	0.241212321	0.204127395	-0.240833791	0.459054952	0.656525518
cg08402572	0.485613978	0.597424026	0.298945308	1.27421E-05	4.12907E-05	cg08402572	0.560427427	0.258620426	-1.115691334	3.58E-23	2.66E-22	cg08402572	0.465769862	0.725995119	0.640342558	8.57E-17	1.49E-16	cg08402572	0.504401122	0.54963888	0.123912576	0.135518838	0.154878672	cg08402572	0.506148045	0.578409995	0.192533057	0.125450536	0.163022016	cg08402572	0.52100951	0.383396584	-0.442472222	0.001090536	0.004362144	cg08402572	0.527384012	0.428547497	-0.299398727	0.000801959	0.006843383
cg08469215	0.265675316	0.392800543	0.564132733	2.76048E-09	1.00955E-07	cg08469215	0.33755792	0.073952059	-2.190472858	1.51E-24	1.84E-23	cg08469215	0.244405669	0.532742438	1.124160461	6.40E-27	1.39E-25	cg08469215	0.311572671	0.178707914	-0.80196517	3.51E-06	1.14E-05	cg08469215	0.296418157	0.253583749	-0.225171528	0.145172295	0.18398073	cg08469215	0.305065045	0.159705947	-0.933698846	5.09E-05	0.000425677	cg08469215	0.292022511	0.302868028	0.0526097	0.45637266	0.656525518
cg08583411	0.500018856	0.541729554	0.1155903	0.002245524	0.004165611	cg08583411	0.536624133	0.371547679	-0.530364581	1.82E-18	4.34E-18	cg08583411	0.477828818	0.661079423	0.468329743	9.74E-21	2.74E-20	cg08583411	0.520675417	0.435039523	-0.259237819	3.67E-05	7.74E-05	cg08583411	0.500604758	0.647118128	0.370357089	2.92E-05	9.36E-05	cg08583411	0.511878896	0.478017694	-0.098738505	0.315505107	0.422017747	cg08583411	0.516880694	0.472553127	-0.129354783	0.024684149	0.083014031
cg08594606	0.72098138	0.7632679	0.082227517	0.42618581	0.472309816	cg08594606	0.764514061	0.558396971	-0.453251919	1.51E-07	1.67E-07	cg08594606	0.695398252	0.899166983	0.370749621	5.70E-11	7.01E-11	cg08594606	0.740038933	0.667373072	-0.149107696	0.023749835	0.030098801	cg08594606	0.71881367	0.914022416	0.3466117	4.29E-06	2.15E-05	cg08594606	0.727057708	0.77004579	0.082874359	0.359665869	0.470236055	cg08594606	0.746430125	0.652806216	-0.193352418	0.000185894	0.002163132
cg08877374	0.244619844	0.269597198	0.140264061	0.000660868	0.001386739	cg08877374	0.279052515	0.104678565	-1.414570594	7.56E-21	2.55E-20	cg08877374	0.220233024	0.394647622	0.841534237	1.20E-19	2.86E-19	cg08877374	0.262923581	0.167071103	-0.654181313	2.55E-06	9.08E-06	cg08877374	0.229744437	0.57480389	1.323039894	9.81E-09	2.28E-07	cg08877374	0.255076366	0.191191646	-0.415909741	0.066795376	0.119577737	cg08877374	0.260559328	0.199968914	-0.38183616	0.101105319	0.234600329
cg09214398	0.603295751	0.713780527	0.242615123	0.002888896	0.005171729	cg09214398	0.67860503	0.372030417	-0.867151545	3.27E-12	4.45E-12	cg09214398	0.580323479	0.857064618	0.562546681	1.79E-13	2.47E-13	cg09214398	0.638834912	0.556037618	-0.200260668	0.018874849	0.024511405	cg09214398	0.612485871	0.871490747	0.508808783	2.88E-06	1.58E-05	cg09214398	0.632418422	0.572529781	-0.143528654	0.265982238	0.374128862	cg09214398	0.647908117	0.530793951	-0.287637303	0.000142442	0.001736432
cg09233429	0.39334268	0.50244555	0.353180527	2.87778E-08	3.34869E-07	cg09233429	0.464922576	0.179006688	-1.376976993	3.20E-26	9.11E-25	cg09233429	0.376275058	0.616819395	0.713060469	3.60E-23	1.62E-22	cg09233429	0.430455135	0.333537478	-0.368013997	8.02E-05	0.000156657	cg09233429	0.408204834	0.566170183	0.471942504	0.005048969	0.009866688	cg09233429	0.429908646	0.269270901	-0.674971791	3.20E-06	7.46E-05	cg09233429	0.41720339	0.419234339	0.007006011	0.622456188	0.79674392
cg09468328	0.244591737	0.313094228	0.356221247	1.22205E-07	8.83483E-07	cg09468328	0.285257252	0.131556231	-1.116583984	2.86E-22	1.43E-21	cg09468328	0.228588523	0.410429442	0.844381259	5.70E-26	6.35E-25	cg09468328	0.27361584	0.1697834	-0.68845634	5.94E-09	1.09E-07	cg09468328	0.261100153	0.238992272	-0.127639333	0.453832124	0.502948155	cg09468328	0.26518284	0.195101842	-0.442760022	0.00182238	0.006570833	cg09468328	0.257667393	0.270048689	0.067709563	0.264045439	0.466176776
cg09514174	0.239082098	0.316927662	0.406647482	1.41173E-08	2.78003E-07	cg09514174	0.286359912	0.105261983	-1.443845058	5.86E-25	1.00E-23	cg09514174	0.217593995	0.443480134	1.027230738	1.80E-26	3.08E-25	cg09514174	0.268720123	0.175848231	-0.611773536	7.47E-06	2.01E-05	cg09514174	0.257410401	0.23958294	-0.103545169	0.617802014	0.664526536	cg09514174	0.264473011	0.158945651	-0.734586965	5.23E-05	0.000425677	cg09514174	0.257941106	0.248700978	-0.052629523	0.627683161	0.79813603
cg09730719	0.338415541	0.386367787	0.191178991	4.31623E-05	0.000117548	cg09730719	0.375251552	0.217141676	-0.789221391	1.26E-21	5.58E-21	cg09730719	0.318950539	0.494391731	0.632321896	8.60E-25	6.67E-24	cg09730719	0.354550821	0.313277349	-0.178551975	0.016671566	0.021886774	cg09730719	0.34643937	0.39065759	0.173301756	0.060878974	0.084701181	cg09730719	0.351654315	0.317874041	-0.145702717	0.053197073	0.098684426	cg09730719	0.357098557	0.310228889	-0.202989264	0.002553068	0.015941109
cg10114555	0.182625537	0.218678969	0.259925966	0.000208842	0.000460892	cg10114555	0.210389963	0.091097665	-1.207579905	1.18E-15	2.18E-15	cg10114555	0.159737904	0.339738375	1.088717501	2.97E-23	1.38E-22	cg10114555	0.206369848	0.088112742	-1.227809625	4.48E-12	1.15E-09	cg10114555	0.188340786	0.226953441	0.269050907	0.355683473	0.404688751	cg10114555	0.189632599	0.202541068	0.09500747	0.631645093	0.741748366	cg10114555	0.196347956	0.163000192	-0.268538914	0.419758128	0.635846631
cg10277175	0.412349027	0.42138247	0.031264295	0.334110509	0.375894862	cg10277175	0.450677953	0.231433866	-0.961496887	2.13E-19	5.81E-19	cg10277175	0.376640809	0.596414704	0.663126502	9.34E-19	1.96E-18	cg10277175	0.43333997	0.290730405	-0.575817352	1.79E-08	1.85E-07	cg10277175	0.402581446	0.601528981	0.579353563	6.57E-06	2.95E-05	cg10277175	0.410048352	0.466015129	0.184582753	0.107957349	0.181822904	cg10277175	0.415663842	0.408027647	-0.026750346	0.928826877	0.947146598
cg10369594	0.524101274	0.576437459	0.137318475	0.002851228	0.005140241	cg10369594	0.558094561	0.4230139	-0.399804515	8.06E-10	9.93E-10	cg10369594	0.507200038	0.673369551	0.408843634	5.24E-15	8.03E-15	cg10369594	0.540419735	0.505076936	-0.097577198	0.120348319	0.138780043	cg10369594	0.526607533	0.680512451	0.369893399	8.66E-06	3.57E-05	cg10369594	0.536565639	0.525498661	-0.03006758	0.770739533	0.85399875	cg10369594	0.557066779	0.432633558	-0.364704707	4.72E-10	7.22E-08
cg10536276	0.296173891	0.391162783	0.401324643	1.55046E-08	2.83513E-07	cg10536276	0.354135832	0.131511386	-1.429115115	1.40E-24	1.79E-23	cg10536276	0.273892667	0.526568885	0.943011634	1.39E-27	6.32E-26	cg10536276	0.33295689	0.214990522	-0.631062333	6.38E-07	3.02E-06	cg10536276	0.321063567	0.256636392	-0.323133197	0.038214638	0.057210219	cg10536276	0.325085257	0.223243925	-0.54219721	0.0003584	0.001842539	cg10536276	0.313766018	0.334076846	0.090490886	0.199760266	0.381631554
cg10615591	0.199780202	0.219357733	0.134871947	0.015207686	0.023036495	cg10615591	0.226243595	0.092738022	-1.286644082	4.76E-13	6.73E-13	cg10615591	0.179392646	0.323518656	0.850728158	1.90E-11	2.41E-11	cg10615591	0.212548965	0.149270581	-0.509865373	0.01895804	0.024511405	cg10615591	0.184555179	0.515273802	1.481287022	9.98E-06	3.93E-05	cg10615591	0.206084924	0.180597177	-0.190463627	0.168954911	0.25899675	cg10615591	0.221883643	0.118389705	-0.906259684	0.05301555	0.145935277
cg10643916	0.336111484	0.382007447	0.184660926	9.216E-05	0.000224695	cg10643916	0.36949158	0.229486665	-0.687131162	7.06E-18	1.56E-17	cg10643916	0.323496419	0.456360025	0.496422685	1.42E-20	3.95E-20	cg10643916	0.354569217	0.292424401	-0.278003588	4.63E-05	9.42E-05	cg10643916	0.345316135	0.36186738	0.067543318	0.893960857	0.911768842	cg10643916	0.34875751	0.316751373	-0.13887341	0.046621878	0.089738352	cg10643916	0.345009552	0.352503519	0.031001356	0.962907009	0.966683115
cg10661163	0.278584569	0.29014556	0.058661508	0.015547959	0.023413397	cg10661163	0.30534445	0.159312925	-0.938574305	1.02E-17	2.19E-17	cg10661163	0.243600508	0.462422697	0.924695069	2.25E-25	1.98E-24	cg10661163	0.295420093	0.188234918	-0.650233676	4.91E-08	4.05E-07	cg10661163	0.274166812	0.392180611	0.516464267	0.004796276	0.009518191	cg10661163	0.282030897	0.270577648	-0.059810554	0.817448183	0.886489738	cg10661163	0.288757713	0.244422396	-0.240483001	0.190598824	0.372467931
cg10950111	0.441928596	0.562847128	0.348929845	2.34887E-06	9.25092E-06	cg10950111	0.518664104	0.217454965	-1.254083879	2.35E-21	9.54E-21	cg10950111	0.412681719	0.739480588	0.841482746	5.74E-22	2.07E-21	cg10950111	0.474817336	0.429317241	-0.1453285	0.214238338	0.236400925	cg10950111	0.462630592	0.566211356	0.291480015	0.060878974	0.084701181	cg10950111	0.483008554	0.297772555	-0.697837949	3.71E-05	0.000352092	cg10950111	0.484523129	0.392659987	-0.303284944	0.008835417	0.040199987
cg10961323	0.538547695	0.594576595	0.142788556	0.09885823	0.121671668	cg10961323	0.596618503	0.321158401	-0.893523686	6.75E-15	1.18E-14	cg10961323	0.500842942	0.793021802	0.663002266	1.71E-19	3.95E-19	cg10961323	0.579091364	0.367944858	-0.65430141	2.69E-09	6.89E-08	cg10961323	0.53996653	0.726096593	0.427291501	0.000328325	0.000856722	cg10961323	0.546221746	0.608080902	0.154776527	0.174854574	0.263310418	cg10961323	0.555224763	0.530488876	-0.065749415	0.310100901	0.517835678
cg10975001	0.195166166	0.275056387	0.495024436	1.72908E-08	2.94812E-07	cg10975001	0.243222722	0.060162914	-2.01533165	7.11E-24	6.07E-23	cg10975001	0.175593626	0.392960612	1.162144239	4.95E-26	6.04E-25	cg10975001	0.230691424	0.097007632	-1.24979421	4.58E-10	1.95E-08	cg10975001	0.207351086	0.301014278	0.53775632	0.140666988	0.179157955	cg10975001	0.218206752	0.149131696	-0.549108825	0.015078573	0.03446531	cg10975001	0.21804686	0.188013963	-0.21379841	0.676622107	0.839343321
cg10999598	0.271068315	0.349242331	0.365571948	1.6029E-09	6.83903E-08	cg10999598	0.315016478	0.154455264	-1.028238253	2.02E-24	2.16E-23	cg10999598	0.259511451	0.427947161	0.721634477	3.65E-24	2.23E-23	cg10999598	0.295969652	0.23922297	-0.307093331	0.000830056	0.001311364	cg10999598	0.291139601	0.24508742	-0.248414653	0.081051354	0.111554551	cg10999598	0.29404786	0.220815736	-0.413208007	0.000235452	0.00131034	cg10999598	0.289541415	0.282974922	-0.033095515	0.977032568	0.977032568
cg11058730	0.019772756	0.021893366	0.146979804	0.519343198	0.568170336	cg11058730	0.019661865	0.023171277	0.236937391	0.595593351	0.597929012	cg11058730	0.020768529	0.017707744	-0.230018673	0.757092319	0.757092319	cg11058730	0.019971841	0.022010842	0.140246989	0.136810875	0.155660373	cg11058730	0.020395192	0.017828313	-0.194058877	0.706701167	0.735428857	cg11058730	0.020405801	0.018293362	-0.157659129	0.769142571	0.85399875	cg11058730	0.020676159	0.018153667	-0.187707219	0.69834952	0.839343321
cg11063729	0.187543957	0.233576699	0.316667584	4.81535E-05	0.000129761	cg11063729	0.221284609	0.079286666	-1.480752941	2.05E-18	4.85E-18	cg11063729	0.173148643	0.316563672	0.870484622	1.04E-15	1.69E-15	cg11063729	0.211910471	0.105612112	-1.004679575	1.24E-07	9.34E-07	cg11063729	0.190121103	0.31919012	0.747497318	0.003925277	0.007975166	cg11063729	0.194719995	0.234218254	0.266452477	0.654096549	0.7576865	cg11063729	0.205517931	0.160298144	-0.35850655	0.220148824	0.414397785
cg11103390	0.234055522	0.32813073	0.487419909	1.64768E-07	1.0043E-06	cg11103390	0.289053341	0.083095801	-1.798488262	1.74E-20	5.57E-20	cg11103390	0.216571536	0.440109949	1.023020343	7.24E-18	1.35E-17	cg11103390	0.269369849	0.160912026	-0.743316225	0.000113989	0.000216157	cg11103390	0.251341027	0.311998031	0.311890742	0.30422011	0.357249304	cg11103390	0.262384991	0.165472693	-0.665092035	0.003258077	0.010297131	cg11103390	0.259188709	0.234371872	-0.145203433	0.750363874	0.846225338
cg11187245	0.710068586	0.580312673	-0.291127947	6.13737E-08	5.23722E-07	cg11187245	0.651292925	0.832265781	0.353737766	3.27E-12	4.45E-12	cg11187245	0.723961166	0.475213141	-0.607337581	6.43E-16	1.06E-15	cg11187245	0.659769184	0.821313726	0.315972012	3.69E-07	2.01E-06	cg11187245	0.672625661	0.81882643	0.283753852	0.000677793	0.001606621	cg11187245	0.677410294	0.727672188	0.103258761	0.133379803	0.210773022	cg11187245	0.67838507	0.695235674	0.035397694	0.55531584	0.729030026
cg11274940	0.344167836	0.413674998	0.26538549	2.21508E-07	1.28877E-06	cg11274940	0.392874836	0.19198325	-1.033089319	1.53E-26	6.37E-25	cg11274940	0.326684854	0.518448389	0.666300806	4.23E-26	6.02E-25	cg11274940	0.370088786	0.291238923	-0.345668239	1.37E-05	3.18E-05	cg11274940	0.354822406	0.435412027	0.295284144	0.127795066	0.164399683	cg11274940	0.367475445	0.264977962	-0.471775475	1.50E-05	0.000191436	cg11274940	0.359107545	0.361925056	0.011275023	0.793277333	0.875340505
cg11523350	0.788198843	0.837933426	0.088275994	0.752905032	0.783510928	cg11523350	0.83430297	0.622640449	-0.422172078	2.81E-06	2.98E-06	cg11523350	0.774265264	0.919776358	0.248455194	1.21E-06	1.32E-06	cg11523350	0.805201537	0.760383389	-0.082622909	0.109414531	0.126742624	cg11523350	0.78962643	0.952004893	0.269798709	4.21E-07	3.99E-06	cg11523350	0.791125646	0.896542357	0.180464905	0.001027905	0.004176883	cg11523350	0.812954831	0.732999141	-0.149363687	8.46E-05	0.001140456
cg11613875	0.037017129	0.035345929	-0.066648941	0.558268833	0.600490846	cg11613875	0.03541068	0.042868532	0.275734485	0.507651227	0.511648481	cg11613875	0.038117612	0.029543417	-0.367621026	4.84E-06	5.18E-06	cg11613875	0.035608471	0.043403721	0.28559824	0.020069056	0.025688392	cg11613875	0.036864435	0.033177957	-0.152004589	0.631160278	0.67323763	cg11613875	0.036440726	0.039113199	0.102103846	0.010915941	0.027668127	cg11613875	0.037138466	0.034270329	-0.115954182	0.748125244	0.846225338
cg11817892	0.452429055	0.573172442	0.341277665	2.18338E-05	6.49937E-05	cg11817892	0.532839487	0.209214983	-1.348714824	7.02E-23	4.73E-22	cg11817892	0.434077209	0.69715786	0.683533689	3.54E-16	5.93E-16	cg11817892	0.472657262	0.52195993	0.143144637	0.16770043	0.18747297	cg11817892	0.47218872	0.591038072	0.323887485	0.017911463	0.029582803	cg11817892	0.490202597	0.347444786	-0.496594397	0.001300228	0.004824036	cg11817892	0.498148753	0.387846961	-0.361089113	0.000352141	0.003919481
cg11863058	0.621846775	0.627710628	0.013540497	0.546621857	0.592370863	cg11863058	0.666757485	0.403542643	-0.724440982	3.63E-14	5.60E-14	cg11863058	0.58412777	0.811521094	0.474344624	1.17E-14	1.75E-14	cg11863058	0.642462179	0.497390677	-0.369232061	2.42E-05	5.24E-05	cg11863058	0.608366901	0.858166228	0.496315465	3.45E-08	6.21E-07	cg11863058	0.613601509	0.737704932	0.26574185	0.004632102	0.013475205	cg11863058	0.626682649	0.606083743	-0.048217906	0.216833945	0.411181406
cg12041075	0.624713977	0.689720851	0.142816774	0.001457869	0.002806124	cg12041075	0.668154159	0.493024407	-0.438521936	2.21E-14	3.53E-14	cg12041075	0.614561488	0.757786607	0.302234282	2.61E-12	3.37E-12	cg12041075	0.642615734	0.61649844	-0.059859059	0.196651437	0.2188816	cg12041075	0.632492776	0.74480685	0.235817339	0.000977365	0.002252815	cg12041075	0.640126972	0.627277859	-0.029253458	0.610992058	0.727506822	cg12041075	0.650849447	0.582603357	-0.159809845	0.000443006	0.004361902
cg12103475	0.145160776	0.204849307	0.496911339	5.69417E-08	5.2061E-07	cg12103475	0.176590599	0.066829163	-1.401858839	3.88E-17	7.95E-17	cg12103475	0.135249311	0.270192671	0.998367294	3.54E-19	7.94E-19	cg12103475	0.169190666	0.088180378	-0.940120416	1.41E-07	1.02E-06	cg12103475	0.158909232	0.150392316	-0.079472087	0.18842714	0.228613023	cg12103475	0.163228523	0.10052627	-0.699320615	0.002281545	0.007685203	cg12103475	0.158453401	0.158172926	-0.002555952	0.275578529	0.479919071
cg12135769	0.734272796	0.821960075	0.162752168	0.002368907	0.00436288	cg12135769	0.787161037	0.585381046	-0.427282779	1.04E-11	1.38E-11	cg12135769	0.729914537	0.868701392	0.251132795	1.32E-08	1.52E-08	cg12135769	0.753699056	0.753931726	0.000445297	0.779334616	0.788575738	cg12135769	0.748334196	0.839523831	0.165888575	0.00849658	0.015876821	cg12135769	0.757473535	0.708808008	-0.095800581	0.171558281	0.261422142	cg12135769	0.764140848	0.703470925	-0.119347786	0.005883861	0.029534673
cg12433575	0.46731391	0.513030619	0.134652953	0.032841321	0.044483483	cg12433575	0.516302405	0.281849582	-0.873290893	1.15E-14	1.91E-14	cg12433575	0.435247525	0.681233584	0.646313466	1.31E-17	2.41E-17	cg12433575	0.495145959	0.362290862	-0.450705446	3.72E-05	7.74E-05	cg12433575	0.459248094	0.766998046	0.73994917	1.10E-08	2.34E-07	cg12433575	0.47763309	0.475358872	-0.006885701	0.917643346	0.954945921	cg12433575	0.492052862	0.407000922	-0.273781252	0.002160911	0.014184441
cg12504148	0.455485576	0.511726718	0.167968194	0.005155867	0.008741072	cg12504148	0.504075958	0.286121255	-0.817014468	3.16E-17	6.53E-17	cg12504148	0.437494593	0.615064213	0.491471851	5.12E-14	7.41E-14	cg12504148	0.478442438	0.399746131	-0.259261295	0.002971899	0.004250314	cg12504148	0.456827537	0.645052681	0.497767373	6.59E-05	0.000191757	cg12504148	0.472007905	0.419451695	-0.170306343	0.078065194	0.135950271	cg12504148	0.470969258	0.453462383	-0.054650015	0.388168625	0.614751781
cg12513686	0.529224425	0.61864621	0.225234953	0.000707737	0.001461134	cg12513686	0.592238577	0.331664478	-0.836453961	2.24E-16	4.32E-16	cg12513686	0.504782865	0.762849779	0.595736049	9.13E-18	1.69E-17	cg12513686	0.557185059	0.496205936	-0.167217579	0.042177965	0.051662962	cg12513686	0.541579375	0.668112406	0.302918049	0.010299308	0.018437922	cg12513686	0.554201703	0.487444546	-0.185173042	0.115482982	0.190733184	cg12513686	0.56279299	0.482800902	-0.221175986	0.003925269	0.022330422
cg12532266	0.479543931	0.593844407	0.308421996	1.40722E-06	5.84965E-06	cg12532266	0.552163817	0.266931925	-1.048624492	4.12E-22	1.98E-21	cg12532266	0.459696725	0.723160366	0.653633222	7.29E-23	3.11E-22	cg12532266	0.518385265	0.417144485	-0.313477539	0.000121065	0.000222969	cg12532266	0.501153043	0.564585836	0.171941693	0.126618576	0.163708866	cg12532266	0.514166092	0.393790909	-0.384804666	0.001861507	0.006618693	cg12532266	0.506184292	0.498737631	-0.021381677	0.358071658	0.583862067
cg12537329	0.443458578	0.475427155	0.100424956	0.075677098	0.096666147	cg12537329	0.488490961	0.259503421	-0.91257831	1.97E-14	3.17E-14	cg12537329	0.404236912	0.674143227	0.737854071	9.21E-19	1.96E-18	cg12537329	0.468074213	0.336464404	-0.476283404	8.29E-05	0.000160871	cg12537329	0.434946479	0.698683111	0.683800381	1.02E-06	7.94E-06	cg12537329	0.452725253	0.42447553	-0.092954392	0.395794634	0.506617132	cg12537329	0.462287356	0.393899708	-0.230961556	0.030266459	0.094490409
cg12748890	0.295465249	0.412626697	0.481848711	8.26859E-08	6.41442E-07	cg12748890	0.366433006	0.095004556	-1.94748085	4.42E-23	3.14E-22	cg12748890	0.276641207	0.537841807	0.959165835	1.03E-21	3.57E-21	cg12748890	0.341987444	0.187823145	-0.864568504	1.18E-06	5.14E-06	cg12748890	0.306683143	0.556456167	0.859519178	0.000331311	0.000856722	cg12748890	0.335225272	0.156310685	-1.100714517	5.40E-06	9.21E-05	cg12748890	0.325383303	0.302535134	-0.105037526	0.704917242	0.839343321
cg12973017	0.682327547	0.697350207	0.031418894	0.24166727	0.279940366	cg12973017	0.70170973	0.604844045	-0.214311167	4.06E-09	4.86E-09	cg12973017	0.668722153	0.767434615	0.198636928	5.49E-10	6.53E-10	cg12973017	0.68895408	0.664219219	-0.052748361	0.22469411	0.246874215	cg12973017	0.678415467	0.800864587	0.239389264	3.66E-06	1.91E-05	cg12973017	0.685256633	0.690513113	0.011024425	0.959182783	0.970556492	cg12973017	0.694800847	0.641537468	-0.115065988	0.000407484	0.004346496
cg13095627	0.610561662	0.673175721	0.140846141	0.253164184	0.291937077	cg13095627	0.659738814	0.44677769	-0.562337839	1.33E-07	1.48E-07	cg13095627	0.598130941	0.751538499	0.329385663	0.000199431	0.000208385	cg13095627	0.639673336	0.525369087	-0.284004033	0.011517529	0.015518354	cg13095627	0.613936417	0.79170579	0.366875153	5.03E-05	0.000151471	cg13095627	0.620218959	0.675291586	0.122732956	0.160698587	0.247824327	cg13095627	0.629036674	0.602338408	-0.062569876	0.303116052	0.510511245
cg13150534	0.490189078	0.518061099	0.079783918	0.081594469	0.102897459	cg13150534	0.526707397	0.343621859	-0.616179907	1.75E-14	2.84E-14	cg13150534	0.460112305	0.671428697	0.545248158	5.05E-18	9.64E-18	cg13150534	0.503579862	0.449453563	-0.164048525	0.050034932	0.060994965	cg13150534	0.483387172	0.702859455	0.540057046	4.10E-08	6.57E-07	cg13150534	0.496267889	0.49764341	0.003993231	0.853329789	0.906163874	cg13150534	0.515219997	0.405391567	-0.345872511	1.51E-06	4.31E-05
cg13206063	0.396255115	0.493158435	0.315621651	7.56933E-06	2.61858E-05	cg13206063	0.457953887	0.215338962	-1.088592964	1.08E-18	2.61E-18	cg13206063	0.37901902	0.604769869	0.674116015	2.01E-20	5.35E-20	cg13206063	0.43253309	0.321550722	-0.427764179	7.77E-06	2.07E-05	cg13206063	0.40784583	0.575350202	0.496416455	0.002808929	0.006042738	cg13206063	0.422965632	0.355257729	-0.251674404	0.060816491	0.111207298	cg13206063	0.426200016	0.376999545	-0.176967863	0.044735099	0.131516148
cg13296093	0.481518361	0.526684591	0.12934844	0.000117438	0.000275818	cg13296093	0.517374226	0.361448957	-0.517416258	8.50E-20	2.47E-19	cg13296093	0.461858202	0.634834079	0.458929588	3.08E-21	9.51E-21	cg13296093	0.50010633	0.43576708	-0.198677652	0.000746065	0.00118629	cg13296093	0.486900997	0.565307815	0.215408188	0.023596318	0.037519612	cg13296093	0.493457076	0.468540977	-0.07474937	0.414653065	0.528115347	cg13296093	0.498787867	0.456552939	-0.127644218	0.011558452	0.048507603
cg13646917	0.197592173	0.205121738	0.05395459	0.006864294	0.011192734	cg13646917	0.221602425	0.086767642	-1.352744646	4.34E-21	1.57E-20	cg13646917	0.182896678	0.278272452	0.605469226	7.44E-15	1.13E-14	cg13646917	0.212472053	0.113256896	-0.907674194	3.52E-09	8.20E-08	cg13646917	0.181916015	0.475078958	1.384894751	5.76E-09	1.90E-07	cg13646917	0.191974751	0.286721133	0.578731665	0.000465213	0.002290281	cg13646917	0.20869932	0.153707973	-0.441233892	0.023754679	0.08217835
cg13761843	0.576021146	0.606985135	0.075539413	0.028213791	0.038624227	cg13761843	0.597163581	0.511023508	-0.224736524	1.01E-07	1.14E-07	cg13761843	0.562309914	0.682252939	0.278941221	2.94E-14	4.29E-14	cg13761843	0.588253079	0.547984315	-0.102302369	0.021236479	0.027047456	cg13761843	0.575843491	0.694960811	0.271254873	2.20E-06	1.41E-05	cg13761843	0.582878849	0.58304791	0.000418386	0.901083947	0.941540777	cg13761843	0.597962958	0.510134798	-0.2291776	2.60E-08	1.66E-06
cg13772815	0.533781687	0.604600208	0.179731664	5.24755E-05	0.000138492	cg13772815	0.592362832	0.333630012	-0.828232046	6.19E-27	6.37E-25	cg13772815	0.515551139	0.713366903	0.468528745	1.35E-22	5.47E-22	cg13772815	0.561345667	0.472340415	-0.24906245	3.65E-06	1.17E-05	cg13772815	0.538453992	0.725061484	0.429280258	1.68E-06	1.14E-05	cg13772815	0.552278091	0.516109029	-0.097719028	0.182958192	0.273902323	cg13772815	0.552067713	0.537079991	-0.039708254	0.127418563	0.276433493
cg13857119	0.3314662	0.421332637	0.346097912	1.43511E-07	9.66814E-07	cg13857119	0.390626666	0.15390783	-1.343723809	1.37E-26	6.37E-25	cg13857119	0.308620154	0.557964055	0.854339906	3.34E-26	5.03E-25	cg13857119	0.362666978	0.278091859	-0.383083879	0.000297068	0.000513847	cg13857119	0.350477326	0.366188428	0.063265088	0.656531802	0.697394778	cg13857119	0.358441875	0.266988201	-0.424963202	0.002203432	0.007521049	cg13857119	0.354858203	0.334745886	-0.084176333	0.473508717	0.666034239
cg14019050	0.435780202	0.49868482	0.194527634	0.001735985	0.003267736	cg14019050	0.492340491	0.235206006	-1.065731491	2.71E-21	1.07E-20	cg14019050	0.414885839	0.617991718	0.574873088	2.41E-18	4.74E-18	cg14019050	0.464370022	0.35446974	-0.389612366	1.26E-05	3.10E-05	cg14019050	0.432440319	0.724776661	0.745035458	1.41E-09	1.01E-07	cg14019050	0.450711035	0.438065833	-0.041055079	0.57203339	0.690757302	cg14019050	0.458045717	0.409633689	-0.161157228	0.02139524	0.076071965
cg14080585	0.366404877	0.429506236	0.229240371	0.000108164	0.000258786	cg14080585	0.417503584	0.193597139	-1.10873095	5.23E-21	1.83E-20	cg14080585	0.346033423	0.546346413	0.658904592	1.28E-21	4.25E-21	cg14080585	0.39669839	0.274329385	-0.532133376	7.89E-09	1.33E-07	cg14080585	0.373865662	0.484408494	0.37370419	0.016268698	0.027399913	cg14080585	0.38224879	0.358301071	-0.09333958	0.312493165	0.421043422	cg14080585	0.37889757	0.387691913	0.033102757	0.893709182	0.9338349
cg14091103	0.296769372	0.373399951	0.331379533	2.88587E-07	1.60605E-06	cg14091103	0.350508051	0.128786976	-1.444460883	5.13E-23	3.55E-22	cg14091103	0.259385397	0.576335001	1.15181038	3.16E-29	4.04E-27	cg14091103	0.331715366	0.196949756	-0.752118209	2.09E-07	1.31E-06	cg14091103	0.313128628	0.32402188	0.049335823	0.897693437	0.911942539	cg14091103	0.320017449	0.238842189	-0.422092876	0.018301441	0.040389388	cg14091103	0.322134181	0.273409837	-0.2365966	0.478992721	0.67006632
cg14131038	0.242893761	0.301184337	0.310321308	3.95643E-06	1.44692E-05	cg14131038	0.284519923	0.111344037	-1.353505382	7.31E-19	1.89E-18	cg14131038	0.208296535	0.485290598	1.220210071	3.54E-27	9.06E-26	cg14131038	0.272791164	0.145379407	-0.907973991	1.08E-08	1.49E-07	cg14131038	0.256424764	0.24634048	-0.057881875	0.93325432	0.936914141	cg14131038	0.26487996	0.14720527	-0.847509371	0.000116652	0.000728364	cg14131038	0.258097021	0.244874457	-0.075871198	0.491922511	0.680714393
cg14173258	0.821939298	0.853881556	0.055004113	0.940199729	0.958928807	cg14173258	0.856191706	0.692233766	-0.306674545	1.83E-08	2.13E-08	cg14173258	0.812992397	0.906435876	0.156963102	3.58E-05	3.80E-05	cg14173258	0.828814876	0.830408738	0.002771727	0.409840933	0.433550739	cg14173258	0.825233476	0.889345326	0.107941369	0.015751328	0.026704239	cg14173258	0.82958276	0.822358878	-0.01261779	0.840242659	0.896258837	cg14173258	0.828271854	0.832672984	0.007645652	0.674463735	0.839343321
cg14204433	0.312426586	0.40513423	0.374882762	3.64615E-08	3.87832E-07	cg14204433	0.368427105	0.154585996	-1.252969568	4.17E-24	3.68E-23	cg14204433	0.297677661	0.503508867	0.758266228	8.61E-24	4.32E-23	cg14204433	0.343063894	0.267456411	-0.359173508	0.000190796	0.000339193	cg14204433	0.337075214	0.268167062	-0.329938499	0.039779551	0.059206774	cg14204433	0.338378267	0.268432303	-0.334078616	0.008053336	0.020824787	cg14204433	0.330798275	0.343616247	0.054846539	0.701630595	0.839343321
cg14218480	0.432990581	0.466557583	0.10771951	0.059269657	0.07741343	cg14218480	0.472734268	0.277808536	-0.766938522	1.06E-14	1.82E-14	cg14218480	0.403145788	0.6204745	0.622070272	9.31E-20	2.27E-19	cg14218480	0.45437541	0.349696588	-0.37778104	6.21E-05	0.00012428	cg14218480	0.428691186	0.627227219	0.549049411	3.24E-05	0.00010124	cg14218480	0.435454787	0.500248004	0.200120574	0.036806896	0.073613793	cg14218480	0.456514131	0.362834222	-0.331348982	5.83E-05	0.000878478
cg14292823	0.459399427	0.479256686	0.061049502	0.378062798	0.420800331	cg14292823	0.48822827	0.340820156	-0.518545176	1.29E-11	1.70E-11	cg14292823	0.440412883	0.576736097	0.389054652	1.09E-14	1.64E-14	cg14292823	0.475888343	0.385133697	-0.305263758	3.08E-07	1.71E-06	cg14292823	0.457232769	0.568314004	0.313759461	0.00041474	0.001030811	cg14292823	0.46245903	0.479964742	0.053602867	0.467895142	0.587162531	cg14292823	0.46306162	0.467397366	0.013445417	0.892541785	0.9338349
cg14333539	0.489956853	0.585719184	0.25755444	1.00204E-05	3.37528E-05	cg14333539	0.55653516	0.28294064	-0.975973422	1.28E-25	2.90E-24	cg14333539	0.470613675	0.707168314	0.587510392	2.32E-25	1.98E-24	cg14333539	0.523945064	0.428259721	-0.290929559	1.93E-05	4.33E-05	cg14333539	0.505304615	0.60503617	0.259868033	0.035447025	0.054014514	cg14333539	0.520050842	0.405066482	-0.360493961	0.001139806	0.004421064	cg14333539	0.509619701	0.518863361	0.025933614	0.903056432	0.935961322
cg14353649	0.309610632	0.354103848	0.193717509	0.00030116	0.000653364	cg14353649	0.347485773	0.178471371	-0.96126125	2.94E-22	1.45E-21	cg14353649	0.292223856	0.451081122	0.626312948	1.56E-21	5.00E-21	cg14353649	0.33100508	0.244464367	-0.437229162	1.30E-06	5.27E-06	cg14353649	0.315480021	0.383136905	0.280311352	0.203095784	0.244096342	cg14353649	0.319760065	0.316163253	-0.016320074	0.698386739	0.79989293	cg14353649	0.319995606	0.317010607	-0.013520981	0.914759267	0.94426763
cg14413165	0.333029876	0.33985767	0.029279073	0.491940271	0.540500899	cg14413165	0.351640895	0.248454469	-0.501121372	1.18E-10	1.50E-10	cg14413165	0.315763246	0.425215066	0.429349462	1.39E-13	1.94E-13	cg14413165	0.342739246	0.281190746	-0.285562284	0.000300851	0.000516898	cg14413165	0.327013334	0.454297123	0.474286705	1.96E-05	6.79E-05	cg14413165	0.330772975	0.37980825	0.199429874	0.012811132	0.030940093	cg14413165	0.341713535	0.299937808	-0.188124005	0.002909724	0.017323007
cg14550760	0.474665425	0.47029728	-0.013337978	0.819851687	0.849724826	cg14550760	0.487301534	0.405183394	-0.266239716	0.000193608	0.000199853	cg14550760	0.458492052	0.547095315	0.254895478	2.09E-06	2.26E-06	cg14550760	0.476876994	0.452985414	-0.074152588	0.325553477	0.350175169	cg14550760	0.460716929	0.680065968	0.561794088	5.92E-09	1.90E-07	cg14550760	0.46957187	0.523187667	0.155982549	0.079129832	0.136873223	cg14550760	0.490295131	0.393563208	-0.317055078	1.48E-06	4.31E-05
cg14591340	0.491274359	0.556453422	0.179731989	0.014819003	0.022581338	cg14591340	0.544724048	0.309410384	-0.816003946	1.11E-14	1.85E-14	cg14591340	0.461697873	0.718340664	0.637719098	2.86E-19	6.53E-19	cg14591340	0.520122831	0.412070525	-0.335961095	0.000391499	0.000668159	cg14591340	0.497840664	0.631291592	0.342622459	0.003274445	0.006811806	cg14591340	0.505645746	0.506834243	0.003387008	0.945872657	0.962575922	cg14591340	0.518112294	0.445995184	-0.216236686	0.006238189	0.03013163
cg14809332	0.294727917	0.340451124	0.208063977	1.0464E-05	3.47894E-05	cg14809332	0.333422927	0.161107342	-1.049331063	3.16E-24	3.00E-23	cg14809332	0.273554962	0.456067019	0.737415119	9.71E-24	4.76E-23	cg14809332	0.314514907	0.24209797	-0.377537419	0.000116303	0.000217326	cg14809332	0.295664398	0.451299898	0.610125918	0.000369176	0.000935732	cg14809332	0.310642256	0.235649718	-0.398610134	0.002963268	0.009482458	cg14809332	0.310910828	0.275728355	-0.173253224	0.122696441	0.273132947
cg14896463	0.205519655	0.224138523	0.125114253	0.000371738	0.000799704	cg14896463	0.229536329	0.10951453	-1.067600212	9.63E-20	2.74E-19	cg14896463	0.175828592	0.372931944	1.084742686	1.48E-27	6.32E-26	cg14896463	0.221484918	0.132599506	-0.74013306	8.69E-09	1.33E-07	cg14896463	0.205511082	0.275476729	0.422714259	0.043316738	0.063360523	cg14896463	0.213660966	0.1615322	-0.403501583	0.039327538	0.0778385	cg14896463	0.215177162	0.182973334	-0.233891553	0.648776311	0.818161259
cg15128365	0.630537203	0.706642075	0.164398158	0.000667382	0.001389022	cg15128365	0.683515737	0.465678609	-0.55363994	4.19E-17	8.52E-17	cg15128365	0.613980435	0.8088779	0.397729261	4.21E-19	9.29E-19	cg15128365	0.655061537	0.59769799	-0.132213749	0.006465022	0.008898095	cg15128365	0.637429491	0.806343085	0.339128043	2.50E-06	1.46E-05	cg15128365	0.650024633	0.616221321	-0.077045791	0.222090646	0.321215849	cg15128365	0.66084322	0.582643766	-0.181693969	5.83E-05	0.000878478
cg15287850	0.441091787	0.579335129	0.393319249	6.10122E-09	1.73546E-07	cg15287850	0.516879481	0.244593948	-1.079439226	2.66E-22	1.36E-21	cg15287850	0.430610579	0.670453666	0.63875387	5.18E-18	9.82E-18	cg15287850	0.471508229	0.473452526	0.005936821	0.967325471	0.967325471	cg15287850	0.46568644	0.568449342	0.287672913	0.024183438	0.038215803	cg15287850	0.486535195	0.29454977	-0.724032741	5.04E-07	2.52E-05	cg15287850	0.487022689	0.398119342	-0.290788021	0.000736175	0.006498648
cg15299835	0.138613248	0.221181969	0.674168632	3.36167E-11	4.30293E-09	cg15299835	0.178893673	0.046355645	-1.948285413	1.09E-20	3.63E-20	cg15299835	0.131132586	0.281496685	1.102091699	3.04E-21	9.49E-21	cg15299835	0.17000007	0.071864696	-1.242180218	4.29E-09	8.46E-08	cg15299835	0.159526613	0.115723436	-0.463116065	0.033240568	0.051262562	cg15299835	0.161569091	0.101322136	-0.673201836	0.006150463	0.016930306	cg15299835	0.156050454	0.161203529	0.046870777	0.322217184	0.532178059
cg15379633	0.240502814	0.309936189	0.365917446	6.46789E-07	3.12411E-06	cg15379633	0.283559579	0.116672372	-1.28118893	4.96E-20	1.49E-19	cg15379633	0.228107253	0.390127988	0.774235182	2.54E-16	4.34E-16	cg15379633	0.269243077	0.169094058	-0.671083289	5.66E-06	1.59E-05	cg15379633	0.247243421	0.393702324	0.671173099	0.019206823	0.031318131	cg15379633	0.263921936	0.159761925	-0.724187644	0.000149152	0.000909114	cg15379633	0.257297784	0.249208185	-0.046087575	0.506925736	0.697704239
cg15409237	0.541552491	0.619003069	0.192845382	0.007146038	0.011578391	cg15409237	0.59833176	0.35935677	-0.735528777	4.96E-14	7.60E-14	cg15409237	0.519888112	0.746290757	0.521536651	1.74E-16	2.99E-16	cg15409237	0.57513186	0.451997788	-0.347577045	4.63E-05	9.42E-05	cg15409237	0.55050931	0.689578737	0.324948328	0.002987358	0.00637303	cg15409237	0.556837743	0.581544596	0.062632827	0.475614119	0.593937632	cg15409237	0.568163243	0.513238403	-0.146676375	0.013595881	0.051948439
cg15442268	0.625914322	0.655461861	0.06654665	0.000111788	0.000264978	cg15442268	0.651838367	0.534940832	-0.285134944	2.03E-20	6.34E-20	cg15442268	0.608274472	0.749280239	0.300782944	7.16E-21	2.08E-20	cg15442268	0.639574768	0.586215539	-0.125681813	0.000686273	0.001111936	cg15442268	0.62561148	0.741532774	0.245243471	9.15E-06	3.66E-05	cg15442268	0.636464251	0.584548462	-0.122756846	0.006111488	0.016930306	cg15442268	0.639225696	0.599860542	-0.091698268	0.022855724	0.080151581
cg15537850	0.332068237	0.41720702	0.329283704	4.82559E-08	4.57537E-07	cg15537850	0.381396096	0.197692389	-0.948032746	9.44E-19	2.35E-18	cg15537850	0.30811405	0.557802391	0.856289647	1.57E-25	1.59E-24	cg15537850	0.361719136	0.280905909	-0.364782952	0.000702885	0.001131354	cg15537850	0.353403994	0.31210014	-0.179309336	0.355683473	0.404688751	cg15537850	0.359756295	0.245404182	-0.551860094	9.25E-05	0.000623179	cg15537850	0.35706113	0.321506143	-0.151324786	0.179347627	0.361519626
cg15825417	0.554425911	0.6100027	0.137820945	0.000569988	0.001205924	cg15825417	0.601372324	0.39245039	-0.615748182	1.99E-24	2.16E-23	cg15825417	0.543108258	0.680929398	0.326265422	2.18E-20	5.69E-20	cg15825417	0.57487392	0.513914634	-0.161716848	2.23E-05	4.92E-05	cg15825417	0.557171747	0.719180077	0.368230952	5.87E-08	8.35E-07	cg15825417	0.567965906	0.552263636	-0.040447194	0.360762556	0.470236055	cg15825417	0.568178372	0.559901261	-0.021171486	0.055040792	0.149331163
cg16019612	0.426980817	0.480444215	0.170197671	0.0053737	0.009050443	cg16019612	0.466457676	0.299789398	-0.637796824	1.14E-12	1.60E-12	cg16019612	0.418798157	0.53561702	0.354946713	7.40E-10	8.69E-10	cg16019612	0.448180345	0.378053999	-0.245487066	0.00083497	0.001311364	cg16019612	0.438922296	0.437599046	-0.004355962	0.910774768	0.921574468	cg16019612	0.426201216	0.590557366	0.470542499	2.00E-06	5.68E-05	cg16019612	0.446450757	0.402121708	-0.150868834	0.008497261	0.039550885
cg16121744	0.398864702	0.461891683	0.211655115	0.000253688	0.000555078	cg16121744	0.446370468	0.244050372	-0.871062629	2.70E-18	6.35E-18	cg16121744	0.377950467	0.581330379	0.621161132	2.27E-20	5.81E-20	cg16121744	0.424516895	0.336885389	-0.333564112	0.000185892	0.000332786	cg16121744	0.403814928	0.556507288	0.462706338	0.000453308	0.001115835	cg16121744	0.415045832	0.386499731	-0.102803249	0.302590588	0.412038248	cg16121744	0.422731573	0.365145731	-0.211269503	0.005497636	0.029320727
cg16278747	0.607433475	0.668612111	0.138443072	0.006152767	0.010161989	cg16278747	0.640948457	0.520597274	-0.300040588	3.50E-07	3.80E-07	cg16278747	0.594526487	0.74885338	0.332942192	1.35E-12	1.78E-12	cg16278747	0.62554466	0.591473932	-0.080798301	0.091789435	0.108787479	cg16278747	0.613001161	0.74832716	0.287779333	0.000118595	0.000330004	cg16278747	0.620715148	0.62453023	0.008840051	0.925936921	0.955805854	cg16278747	0.644833957	0.505989732	-0.349819609	1.54E-09	1.31E-07
cg16393207	0.610391449	0.7040872	0.206019363	0.001347272	0.002653089	cg16393207	0.671680797	0.427241183	-0.652725064	6.99E-12	9.42E-12	cg16393207	0.600815244	0.777779704	0.372440171	6.50E-10	7.70E-10	cg16393207	0.634903028	0.60695342	-0.064950454	0.16469242	0.184917805	cg16393207	0.625161769	0.726902423	0.21753216	0.041634284	0.061255039	cg16393207	0.630640443	0.637679724	0.016014315	0.654096549	0.7576865	cg16393207	0.643835336	0.570096496	-0.175485625	0.00100675	0.007809942
cg16449084	0.372003506	0.399462319	0.102743204	0.089639757	0.111940379	cg16449084	0.410835674	0.213231001	-0.946144255	2.57E-15	4.56E-15	cg16449084	0.333774372	0.592065031	0.826882462	1.71E-24	1.22E-23	cg16449084	0.397096706	0.254383581	-0.642484835	1.67E-08	1.85E-07	cg16449084	0.372740186	0.463260839	0.313654362	0.02150341	0.034621842	cg16449084	0.374532742	0.42086079	0.16825126	0.141112426	0.220273056	cg16449084	0.385340144	0.343126822	-0.167390584	0.093077865	0.226882967
cg16495212	0.364181883	0.381309243	0.066302346	0.023908111	0.033814787	cg16495212	0.405200325	0.180563159	-1.166131769	1.90E-24	2.16E-23	cg16495212	0.340845005	0.498990124	0.549895422	6.07E-14	8.72E-14	cg16495212	0.38248868	0.273529896	-0.483718524	5.79E-06	1.61E-05	cg16495212	0.353761296	0.594096821	0.747921855	2.39E-06	1.46E-05	cg16495212	0.359995396	0.463825577	0.365603921	0.01172512	0.029427752	cg16495212	0.371076443	0.353045249	-0.071863314	0.560276147	0.731789253
cg16622899	0.4568743	0.523732207	0.197032035	2.16489E-08	3.07895E-07	cg16622899	0.500130038	0.328592604	-0.606003249	2.79E-21	1.08E-20	cg16622899	0.442148117	0.614420409	0.474696395	2.76E-26	4.42E-25	cg16622899	0.48005346	0.417382058	-0.201826493	8.84E-06	2.29E-05	cg16622899	0.473467613	0.443757774	-0.09349335	0.121996761	0.16015985	cg16622899	0.477618362	0.400804903	-0.252958144	0.000108939	0.000709252	cg16622899	0.469270574	0.483484411	0.043049376	0.787591796	0.875340505
cg16859636	0.554233523	0.652144809	0.234698376	0.002186067	0.004084914	cg16859636	0.620650087	0.350909867	-0.822679614	1.58E-14	2.60E-14	cg16859636	0.526088542	0.816715264	0.634527562	3.53E-20	8.86E-20	cg16859636	0.586928155	0.504540615	-0.218213506	0.013293885	0.017725179	cg16859636	0.567641129	0.708219909	0.319218276	0.00575493	0.010994494	cg16859636	0.583518339	0.485252129	-0.266043455	0.032344815	0.066776393	cg16859636	0.590773499	0.504443058	-0.227913685	0.002813133	0.017146712
cg17001035	0.22314122	0.233522011	0.065601498	0.004380508	0.007526242	cg17001035	0.247845246	0.112641646	-1.137699261	5.86E-21	2.03E-20	cg17001035	0.202323887	0.337062124	0.736347856	5.79E-19	1.27E-18	cg17001035	0.237875081	0.144508732	-0.719047472	1.21E-08	1.49E-07	cg17001035	0.2115628	0.446166062	1.076494802	3.66E-06	1.91E-05	cg17001035	0.223224184	0.252090238	0.175446912	0.129110768	0.206577229	cg17001035	0.23340088	0.18703526	-0.319499729	0.107399835	0.2433129
cg17079034	0.209059097	0.254515152	0.283840726	7.79121E-07	3.69361E-06	cg17079034	0.240740912	0.110397176	-1.124778066	9.93E-24	8.20E-23	cg17079034	0.194101684	0.340046679	0.808920165	3.82E-24	2.28E-23	cg17079034	0.225422138	0.178277615	-0.33850364	0.001800098	0.002663729	cg17079034	0.215940257	0.270108864	0.322908759	0.181392769	0.221126423	cg17079034	0.22263307	0.177294656	-0.328518854	0.013347729	0.03153259	cg17079034	0.225099702	0.190401074	-0.241522532	0.050877591	0.142549759
cg17186163	0.236067742	0.274534162	0.21778477	1.23573E-05	4.05573E-05	cg17186163	0.266125592	0.136222522	-0.966142007	3.88E-21	1.44E-20	cg17186163	0.218124588	0.372430924	0.771820465	4.12E-24	2.40E-23	cg17186163	0.253541587	0.186404293	-0.443787313	2.90E-06	9.76E-06	cg17186163	0.241679401	0.291091435	0.268377876	0.230276786	0.274190033	cg17186163	0.249995643	0.179893753	-0.47475786	0.000295635	0.001610265	cg17186163	0.245381344	0.240846581	-0.026911124	0.703821077	0.839343321
cg17209284	0.652510088	0.768092168	0.235279233	0.000128154	0.000295563	cg17209284	0.720934819	0.462740123	-0.63966663	1.61E-14	2.65E-14	cg17209284	0.6445781	0.840262028	0.382484116	1.64E-12	2.14E-12	cg17209284	0.674388168	0.70269628	0.059322037	0.538922279	0.56311879	cg17209284	0.672825658	0.762925324	0.181309129	0.029353334	0.045542143	cg17209284	0.683213779	0.61747564	-0.145954849	0.275064695	0.380630064	cg17209284	0.697106296	0.586677636	-0.24881066	1.19E-06	4.31E-05
cg17317391	0.452057225	0.541771399	0.261178822	5.58759E-05	0.000145962	cg17317391	0.517245907	0.243938555	-1.084332527	2.19E-22	1.21E-21	cg17317391	0.426695819	0.690501304	0.694436163	2.21E-20	5.71E-20	cg17317391	0.48142874	0.410339646	-0.23050372	0.00798372	0.010929585	cg17317391	0.464609076	0.588910934	0.34203212	0.01058289	0.018814026	cg17317391	0.482222737	0.348861963	-0.467043369	0.000912509	0.003893374	cg17317391	0.477344298	0.445991407	-0.098014312	0.336861825	0.552798892
cg17327990	0.071123717	0.078842266	0.148638523	9.83164E-07	4.41561E-06	cg17327990	0.077941681	0.047127741	-0.725818531	2.42E-15	4.33E-15	cg17327990	0.062973708	0.120449469	0.9356065	7.63E-27	1.50E-25	cg17327990	0.076396841	0.04965407	-0.621601006	1.77E-08	1.85E-07	cg17327990	0.071608175	0.09236539	0.367228054	0.916388675	0.923604334	cg17327990	0.074672986	0.05079753	-0.555828069	0.00032042	0.001708905	cg17327990	0.074788819	0.063411003	-0.238089412	0.530840992	0.70778799
cg17330838	0.322554602	0.418847823	0.376882774	4.22761E-07	2.12209E-06	cg17330838	0.381743999	0.153457842	-1.31476311	1.84E-21	7.72E-21	cg17330838	0.307646255	0.519043029	0.754581715	3.00E-22	1.15E-21	cg17330838	0.35726096	0.257066352	-0.474837485	6.09E-05	0.00012268	cg17330838	0.337272643	0.44963733	0.414846515	0.180623365	0.221126423	cg17330838	0.3542633	0.219819126	-0.688505104	5.32E-05	0.000425677	cg17330838	0.344241969	0.342374065	-0.007849575	0.793277333	0.875340505
cg17393635	0.471955942	0.5533873	0.229637348	6.63265E-06	2.32597E-05	cg17393635	0.528802574	0.294752399	-0.843225646	4.84E-22	2.25E-21	cg17393635	0.465903934	0.606471703	0.38040782	1.22E-13	1.71E-13	cg17393635	0.496552705	0.447522615	-0.149986267	0.001157393	0.001763646	cg17393635	0.477299803	0.692356147	0.536618609	8.97E-07	7.18E-06	cg17393635	0.499227197	0.379599034	-0.39522021	0.000177817	0.001058633	cg17393635	0.489431272	0.492891451	0.010163675	0.71922242	0.846225338
cg17397004	0.411348748	0.441761947	0.102907097	0.023167612	0.032949493	cg17397004	0.450760452	0.253614632	-0.82972296	8.31E-16	1.54E-15	cg17397004	0.378786996	0.607870828	0.682377982	1.06E-21	3.63E-21	cg17397004	0.435121798	0.307248444	-0.502013587	1.33E-06	5.32E-06	cg17397004	0.402151536	0.671633926	0.739935877	6.96E-07	5.94E-06	cg17397004	0.422449225	0.365873414	-0.207433364	0.089252134	0.153345948	cg17397004	0.426295145	0.37852114	-0.17147875	0.09250419	0.226882967
cg17453840	0.409856849	0.492556658	0.265169578	0.00019912	0.000447147	cg17453840	0.48656776	0.134321289	-1.856952751	1.74E-26	6.37E-25	cg17453840	0.375464455	0.682828504	0.86284695	6.03E-19	1.31E-18	cg17453840	0.451969254	0.273491311	-0.724729639	1.42E-06	5.59E-06	cg17453840	0.413489753	0.662217961	0.679454564	0.000403782	0.001013413	cg17453840	0.426346351	0.450539959	0.079629158	0.690671586	0.796450117	cg17453840	0.433333221	0.403462046	-0.10304388	0.522165999	0.70778799
cg17656260	0.101587445	0.116831391	0.201705854	3.17433E-06	1.19504E-05	cg17656260	0.112486349	0.067119676	-0.744942281	4.07E-18	9.22E-18	cg17656260	0.09155267	0.169743185	0.890679783	3.65E-24	2.23E-23	cg17656260	0.110174267	0.071084266	-0.632185133	2.68E-08	2.45E-07	cg17656260	0.105167632	0.101827265	-0.046566842	0.689243388	0.723140604	cg17656260	0.106453306	0.087170026	-0.288316723	0.004424631	0.013170994	cg17656260	0.106671139	0.096757474	-0.140724883	0.579318681	0.749018092
cg17720013	0.677830581	0.702399697	0.051367495	0.978625283	0.978625283	cg17720013	0.708755193	0.555008135	-0.352778484	2.07E-05	2.16E-05	cg17720013	0.669905964	0.747857759	0.158805303	0.089399543	0.091545132	cg17720013	0.691035009	0.632803606	-0.127000983	0.090222418	0.107427623	cg17720013	0.673328738	0.841544072	0.321727788	1.22E-06	8.95E-06	cg17720013	0.675339745	0.778593062	0.205256023	0.001281427	0.004824036	cg17720013	0.688166593	0.659702998	-0.060941197	0.188109748	0.370431504
cg17792192	0.631298849	0.799490414	0.340757615	0.001431118	0.002775502	cg17792192	0.732917387	0.344833488	-1.087750702	2.85E-14	4.51E-14	cg17792192	0.624099767	0.883542132	0.501522259	7.40E-10	8.69E-10	cg17792192	0.664929388	0.69264595	0.058916958	0.543260788	0.56534456	cg17792192	0.658682905	0.82661073	0.327623983	0.029353334	0.045542143	cg17792192	0.66856887	0.669226576	0.001418557	0.703030895	0.79989293	cg17792192	0.698639548	0.523694913	-0.41582172	0.000136611	0.001736432
cg18030218	0.013865262	0.01354428	-0.033791138	0.261037272	0.299666105	cg18030218	0.013371017	0.015924251	0.252116281	0.001570761	0.001614919	cg18030218	0.013932493	0.013125633	-0.086066421	0.327294841	0.329871966	cg18030218	0.013839939	0.013495169	-0.036394541	0.835157491	0.841733535	cg18030218	0.013899957	0.012109919	-0.198891272	0.017797588	0.029582803	cg18030218	0.013823844	0.01343637	-0.041015373	0.856608037	0.906163874	cg18030218	0.013813187	0.013701594	-0.011702492	0.519290615	0.70778799
cg18183774	0.642327601	0.756278956	0.235609184	5.98231E-05	0.000153147	cg18183774	0.70814718	0.463492427	-0.611503473	3.34E-13	4.83E-13	cg18183774	0.629051562	0.853769711	0.440668704	3.23E-15	5.04E-15	cg18183774	0.672280085	0.63722257	-0.077265048	0.153065745	0.1726204	cg18183774	0.670357176	0.623974939	-0.103441903	0.352009313	0.404100378	cg18183774	0.672731948	0.606181262	-0.150282518	0.111670155	0.186846796	cg18183774	0.675394171	0.630046771	-0.1002708	0.033198353	0.10239492
cg18359371	0.441224568	0.472329262	0.098279791	0.020915391	0.030080562	cg18359371	0.469210824	0.341951849	-0.456443105	2.09E-13	3.11E-13	cg18359371	0.42956484	0.537734498	0.324018116	1.47E-14	2.19E-14	cg18359371	0.454981616	0.403492055	-0.173267986	0.000562508	0.000941189	cg18359371	0.440552598	0.568551491	0.367976738	5.62E-05	0.000165309	cg18359371	0.450403011	0.420808333	-0.098053198	0.213512015	0.310562931	cg18359371	0.450827814	0.435085656	-0.051277073	0.126683016	0.276433493
cg18489607	0.531200979	0.567978981	0.096579735	0.008150921	0.013041473	cg18489607	0.566800219	0.401189635	-0.498555983	3.47E-18	8.01E-18	cg18489607	0.510222816	0.680032631	0.414476559	4.47E-17	7.95E-17	cg18489607	0.550959246	0.46384938	-0.248289195	4.05E-05	8.37E-05	cg18489607	0.53066609	0.677623234	0.35267898	2.05E-05	6.99E-05	cg18489607	0.537440794	0.562413589	0.06552562	0.248442131	0.35333992	cg18489607	0.548412056	0.495670783	-0.145878066	0.011558452	0.048507603
cg18511546	0.740097969	0.647838511	-0.192082025	3.63775E-06	1.34966E-05	cg18511546	0.700195971	0.817471257	0.223409246	1.38E-09	1.67E-09	cg18511546	0.745918454	0.592698054	-0.331720598	7.66E-13	1.02E-12	cg18511546	0.704052913	0.821025566	0.221743287	6.16E-07	3.02E-06	cg18511546	0.713978876	0.809418581	0.181004578	0.008980418	0.016539475	cg18511546	0.71738796	0.74648502	0.057359775	0.18433543	0.27435971	cg18511546	0.718878209	0.723237167	0.008721447	0.441340542	0.656525518
cg18649823	0.11343241	0.129966584	0.196307824	8.47867E-05	0.000212798	cg18649823	0.127648789	0.06398677	-0.996334299	1.92E-22	1.09E-21	cg18649823	0.104908021	0.175965032	0.746163772	1.76E-15	2.80E-15	cg18649823	0.121478614	0.088599639	-0.455329632	0.001092469	0.001674683	cg18649823	0.114157507	0.163906521	0.521847516	0.001695849	0.003710576	cg18649823	0.118247783	0.103342676	-0.194376985	0.050676726	0.096815237	cg18649823	0.119602673	0.105025331	-0.187512299	0.750363874	0.846225338
cg18729787	0.559152338	0.611804508	0.129829346	0.012334963	0.018908686	cg18729787	0.602680224	0.410474639	-0.554099636	5.09E-16	9.57E-16	cg18729787	0.539532944	0.721951354	0.420190576	2.99E-17	5.38E-17	cg18729787	0.575742194	0.538887553	-0.095438681	0.106896713	0.124388902	cg18729787	0.564875946	0.665592609	0.236705347	0.003299468	0.006811806	cg18729787	0.571620489	0.56141578	-0.025988014	0.699933547	0.79989293	cg18729787	0.581798924	0.517908692	-0.167822858	0.00089659	0.007364778
cg18869127	0.294870268	0.363878969	0.30337831	1.19702E-06	5.28341E-06	cg18869127	0.347532408	0.122101144	-1.509070805	1.36E-25	2.90E-24	cg18869127	0.260041516	0.55224446	1.086565073	4.56E-30	1.17E-27	cg18869127	0.325872028	0.208028865	-0.647521799	6.88E-07	3.20E-06	cg18869127	0.310156554	0.310600945	0.002065608	0.838299106	0.861865748	cg18869127	0.314786949	0.254933652	-0.304253906	0.074260884	0.131708201	cg18869127	0.315572708	0.284162844	-0.151254516	0.409622866	0.631707553
cg18924331	0.647266959	0.693564814	0.099669848	0.291140887	0.331253631	cg18924331	0.689716609	0.495508705	-0.477093305	4.74E-09	5.64E-09	cg18924331	0.625250406	0.813421683	0.379569361	9.94E-14	1.41E-13	cg18924331	0.663972678	0.615657255	-0.108996471	0.066728324	0.080199301	cg18924331	0.646397539	0.834707689	0.368849355	1.06E-06	7.99E-06	cg18924331	0.659920763	0.628972814	-0.069295148	0.226070577	0.325135212	cg18924331	0.670344034	0.595728305	-0.170247199	0.000736175	0.006498648
cg19028462	0.367868969	0.4560509	0.31000287	3.32259E-05	9.66572E-05	cg19028462	0.434906203	0.148389412	-1.55131613	4.41E-21	1.57E-20	cg19028462	0.324983095	0.68893258	1.083998133	9.43E-25	7.10E-24	cg19028462	0.40884047	0.248068856	-0.720797389	2.54E-05	5.47E-05	cg19028462	0.375995035	0.569346748	0.59859395	0.001373151	0.003110855	cg19028462	0.396135028	0.283047213	-0.484949555	0.006111488	0.016930306	cg19028462	0.401360626	0.320213465	-0.325865119	0.068142118	0.175015916
cg19300923	0.50278044	0.52101032	0.051383423	0.49109661	0.540500899	cg19300923	0.53507771	0.364555634	-0.553609435	2.46E-10	3.09E-10	cg19300923	0.482459176	0.624456216	0.372193548	1.83E-09	2.12E-09	cg19300923	0.518271871	0.432297148	-0.261685777	0.000516566	0.000870007	cg19300923	0.49945	0.624096488	0.321428835	0.002480942	0.005382382	cg19300923	0.50727678	0.501410559	-0.016780746	0.969173054	0.976804338	cg19300923	0.502433307	0.528029377	0.071686092	0.464445944	0.660545343
cg19482025	0.238269486	0.25368323	0.090433945	0.039880924	0.053452966	cg19482025	0.265289317	0.122848748	-1.110683423	2.16E-13	3.20E-13	cg19482025	0.208348353	0.402647902	0.95052112	1.04E-18	2.13E-18	cg19482025	0.256932637	0.14244121	-0.851023562	8.42E-07	3.78E-06	cg19482025	0.233822996	0.366770224	0.649459698	0.012270223	0.021222726	cg19482025	0.239337894	0.269911314	0.173436617	0.577729969	0.694360901	cg19482025	0.250079656	0.201186441	-0.313854616	0.166778768	0.341562917
cg19577312	0.818403063	0.828778204	0.018174517	0.596700923	0.636480984	cg19577312	0.84262683	0.710314368	-0.246436187	1.46E-07	1.63E-07	cg19577312	0.804723253	0.897859652	0.157997228	5.32E-07	5.82E-07	cg19577312	0.830551199	0.7565971	-0.134543858	0.000117871	0.000218659	cg19577312	0.814378897	0.921294077	0.177961561	3.64E-08	6.21E-07	cg19577312	0.814225855	0.898457842	0.142021777	0.000235452	0.00131034	cg19577312	0.820873159	0.819894589	-0.001720877	0.068365592	0.175015916
cg19619576	0.501554815	0.635157301	0.340706547	4.89004E-06	1.76317E-05	cg19619576	0.585479787	0.257864536	-1.18300599	1.59E-21	6.91E-21	cg19619576	0.480040457	0.778179067	0.696946173	1.56E-21	5.00E-21	cg19619576	0.538750075	0.482043154	-0.160453858	0.06945082	0.083081354	cg19619576	0.521211251	0.690026798	0.404784164	0.000985606	0.002252815	cg19619576	0.542027539	0.401273917	-0.433778769	0.000859427	0.003729038	cg19619576	0.546918561	0.455319254	-0.264447559	0.001195662	0.00900263
cg19729479	0.61691479	0.565428436	-0.125726795	1.98389E-05	6.11899E-05	cg19729479	0.595126314	0.657680394	0.144190754	1.07E-06	1.15E-06	cg19729479	0.61806144	0.544802056	-0.182018114	1.30E-09	1.51E-09	cg19729479	0.596600408	0.6633734	0.153056201	2.12E-06	7.86E-06	cg19729479	0.601248848	0.672929448	0.162493033	0.000281269	0.000742318	cg19729479	0.605734972	0.602554277	-0.007595506	0.947535673	0.962575922	cg19729479	0.606473418	0.600744231	-0.013693525	0.526012536	0.70778799
cg19878482	0.200733325	0.269043609	0.422559892	4.54278E-08	4.47289E-07	cg19878482	0.251180106	0.038184739	-2.717654124	2.63E-24	2.59E-23	cg19878482	0.159589279	0.48769202	1.611606632	1.68E-25	1.59E-24	cg19878482	0.236996597	0.078469603	-1.594660544	1.56E-07	1.02E-06	cg19878482	0.207576147	0.348096025	0.74584467	0.098410278	0.131900686	cg19878482	0.225958901	0.095075306	-1.248917803	0.000711436	0.003219623	cg19878482	0.227027728	0.162127092	-0.485743321	0.728075128	0.846225338
cg19887750	0.188747628	0.213019098	0.174524263	2.35938E-05	6.94255E-05	cg19887750	0.214597247	0.091082766	-1.236381562	1.76E-21	7.51E-21	cg19887750	0.169698841	0.312092812	0.878998424	6.49E-21	1.91E-20	cg19887750	0.205215237	0.121977642	-0.750521119	2.72E-07	1.58E-06	cg19887750	0.189048079	0.27498846	0.540617886	0.052041558	0.07401466	cg19887750	0.195697638	0.175361357	-0.158295476	0.030533371	0.064070024	cg19887750	0.195452174	0.187766375	-0.057876902	0.771733303	0.862723693
cg20091689	0.404778608	0.438154866	0.114307835	0.063542487	0.082572978	cg20091689	0.462953753	0.156525542	-1.564469987	2.23E-22	1.21E-21	cg20091689	0.363252954	0.648406235	0.835923432	7.86E-19	1.69E-18	cg20091689	0.4374559	0.247640223	-0.820891923	3.06E-08	2.61E-07	cg20091689	0.39680652	0.656695765	0.726789419	7.84E-06	3.35E-05	cg20091689	0.406591568	0.479300751	0.237350903	0.127016437	0.204504452	cg20091689	0.414193399	0.402486845	-0.041362931	0.843751981	0.911394545
cg20321801	0.255389034	0.341557561	0.419432151	5.28081E-09	1.68986E-07	cg20321801	0.299672645	0.1477937	-1.019802624	4.32E-19	1.13E-18	cg20321801	0.243717835	0.42315757	0.795983144	1.17E-21	3.96E-21	cg20321801	0.279985485	0.238853017	-0.229228935	0.025637516	0.032331054	cg20321801	0.275167233	0.264047644	-0.059510413	0.8125806	0.838792877	cg20321801	0.282710408	0.176095606	-0.682966088	4.56E-06	8.33E-05	cg20321801	0.282300813	0.236894917	-0.252986039	0.073673979	0.184907241
cg20655350	0.688812893	0.713741846	0.051290213	0.918906479	0.940960234	cg20655350	0.714286911	0.593920006	-0.266235055	1.29E-07	1.45E-07	cg20655350	0.67428395	0.791188332	0.230664893	5.59E-11	6.91E-11	cg20655350	0.702085159	0.64394395	-0.124710912	0.008878169	0.012089421	cg20655350	0.686916379	0.812451036	0.242146383	2.91E-06	1.58E-05	cg20655350	0.690461276	0.740942738	0.101801548	0.052940415	0.098684426	cg20655350	0.704178899	0.646867889	-0.1224709	0.001513932	0.010199123
cg20801110	0.312972781	0.473523381	0.59739847	1.40826E-11	3.60516E-09	cg20801110	0.397085091	0.104430346	-1.926907189	3.10E-26	9.11E-25	cg20801110	0.297655808	0.594525324	0.998093221	2.34E-22	9.23E-22	cg20801110	0.365944139	0.235654713	-0.634948905	0.000162033	0.000294187	cg20801110	0.354041988	0.262037137	-0.434149177	0.027978912	0.04394234	cg20801110	0.35101962	0.319537444	-0.135566672	0.205175117	0.301866839	cg20801110	0.357135715	0.307380945	-0.216444684	0.292836346	0.500931056
cg20831708	0.469629054	0.496397375	0.079973823	0.548405838	0.592370863	cg20831708	0.50910471	0.306691355	-0.731174913	1.12E-08	1.33E-08	cg20831708	0.447744703	0.60989185	0.445877072	1.64E-07	1.83E-07	cg20831708	0.50138027	0.307507227	-0.705284909	2.31E-08	2.27E-07	cg20831708	0.459954975	0.72382811	0.654154494	1.75E-07	1.94E-06	cg20831708	0.461257899	0.647299227	0.488859165	2.30E-05	0.000252641	cg20831708	0.481865763	0.445169493	-0.114276569	0.135343757	0.286347121
cg21161394	0.199988366	0.268153608	0.423143589	1.41671E-06	5.84965E-06	cg21161394	0.240569361	0.086926802	-1.468579936	4.78E-16	9.07E-16	cg21161394	0.181098364	0.379326187	1.066665461	3.99E-20	9.92E-20	cg21161394	0.235207221	0.084283224	-1.480614936	1.80E-10	9.44E-09	cg21161394	0.210517758	0.288190689	0.45308179	0.179091834	0.221126423	cg21161394	0.220495378	0.15053472	-0.550652137	0.006805251	0.018338362	cg21161394	0.215895721	0.211338945	-0.030776006	0.750363874	0.846225338
cg21163717	0.731241063	0.638678885	-0.195256333	1.47754E-07	9.6987E-07	cg21163717	0.678750054	0.871603588	0.360791728	1.97E-20	6.24E-20	cg21163717	0.742435759	0.55750523	-0.41328086	5.49E-21	1.63E-20	cg21163717	0.697855162	0.794350078	0.186847318	4.92E-06	1.50E-05	cg21163717	0.707933025	0.754730706	0.092349093	0.094161538	0.126870283	cg21163717	0.703853892	0.792880832	0.171828068	0.001123158	0.004421064	cg21163717	0.716076035	0.684759071	-0.064516314	0.158339045	0.326893512
cg21184369	0.669530968	0.699698564	0.063582744	0.958333272	0.966955051	cg21184369	0.707552788	0.518466979	-0.448585677	0.000126326	0.000130929	cg21184369	0.651530321	0.795440468	0.287921641	0.002292531	0.002366483	cg21184369	0.674517553	0.687342085	0.027172307	0.661760528	0.674943008	cg21184369	0.663606189	0.876863439	0.402024835	1.85E-06	1.21E-05	cg21184369	0.674576413	0.696007539	0.045121058	0.306526289	0.415189048	cg21184369	0.693610532	0.592294622	-0.227810818	0.000920597	0.007364778
cg21548131	0.550566988	0.637782487	0.212146374	0.002851228	0.005140241	cg21548131	0.614251965	0.346674112	-0.825250461	2.24E-16	4.32E-16	cg21548131	0.521162198	0.80529981	0.62779355	1.92E-20	5.18E-20	cg21548131	0.574898022	0.537504088	-0.097030341	0.272289311	0.296621547	cg21548131	0.564860596	0.650356742	0.203336437	0.086972331	0.117803792	cg21548131	0.577862755	0.474600965	-0.284011853	0.013663194	0.031797978	cg21548131	0.583890249	0.502474738	-0.216646152	0.005134442	0.027966324
cg21655969	0.136717486	0.146919163	0.10382481	0.026618008	0.037033751	cg21655969	0.148046198	0.09333229	-0.665599244	1.14E-08	1.34E-08	cg21655969	0.119551907	0.232777625	0.961315248	7.61E-25	6.09E-24	cg21655969	0.145252314	0.098149068	-0.565514673	1.69E-05	3.82E-05	cg21655969	0.137006224	0.170382852	0.314538711	0.104311864	0.139082485	cg21655969	0.142221727	0.100094511	-0.506779023	0.001796716	0.006570833	cg21655969	0.143476679	0.117278725	-0.290874937	0.041388475	0.124652347
cg21800196	0.405883191	0.459236654	0.178173201	0.008280946	0.013167219	cg21800196	0.453412832	0.237993027	-0.929905919	1.10E-14	1.84E-14	cg21800196	0.374119541	0.628216496	0.747762503	9.34E-19	1.96E-18	cg21800196	0.438945205	0.27953518	-0.651010998	1.59E-07	1.02E-06	cg21800196	0.412667506	0.498088069	0.27142101	0.12429091	0.162339148	cg21800196	0.414820419	0.452540678	0.125560571	0.478202547	0.594271127	cg21800196	0.423263634	0.390969153	-0.114501754	0.382511579	0.614751781
cg21824343	0.537932467	0.660915781	0.297041379	1.95773E-08	2.94812E-07	cg21824343	0.613026699	0.324489168	-0.917779588	3.64E-23	2.66E-22	cg21824343	0.52613208	0.75393	0.519005561	1.01E-18	2.09E-18	cg21824343	0.568530628	0.543676634	-0.064489246	0.101998946	0.119231645	cg21824343	0.565782451	0.556305155	-0.024370953	0.6029238	0.651259463	cg21824343	0.573601864	0.464659267	-0.303876532	0.002329621	0.007745235	cg21824343	0.568359677	0.550072635	-0.04718207	0.195649566	0.379441582
cg22027399	0.313719629	0.33749882	0.10540666	0.025716216	0.035974598	cg22027399	0.337496044	0.22583553	-0.579598112	2.07E-09	2.48E-09	cg22027399	0.28864566	0.465515331	0.689529147	9.46E-19	1.97E-18	cg22027399	0.333147968	0.226851543	-0.554414617	2.25E-07	1.37E-06	cg22027399	0.309571404	0.46884838	0.598849239	0.000138257	0.000380579	cg22027399	0.320927799	0.295815413	-0.117551539	0.483402422	0.597831015	cg22027399	0.329412779	0.268708548	-0.293854307	0.008950778	0.040199987
cg22128918	0.682419515	0.718275277	0.073877954	0.004271088	0.007387827	cg22128918	0.713177071	0.57555436	-0.309308127	1.20E-17	2.57E-17	cg22128918	0.668565517	0.795666093	0.251094174	2.16E-14	3.19E-14	cg22128918	0.696612889	0.649764482	-0.100440283	0.009447829	0.012797059	cg22128918	0.682601218	0.813989545	0.253967275	2.50E-06	1.46E-05	cg22128918	0.690168709	0.692859269	0.005613282	0.748473438	0.844093393	cg22128918	0.69922806	0.647640024	-0.110570936	0.001416868	0.009803198
cg22271905	0.143500111	0.163971366	0.19239205	0.000202312	0.000450365	cg22271905	0.161135851	0.082108425	-0.972675347	3.59E-14	5.57E-14	cg22271905	0.130659845	0.231959056	0.828054345	1.72E-15	2.75E-15	cg22271905	0.154256734	0.107581304	-0.519906091	0.000707096	0.001131354	cg22271905	0.143847406	0.214745324	0.578087507	0.009886611	0.01782375	cg22271905	0.146705987	0.164081293	0.161483018	0.791586192	0.869725601	cg22271905	0.156256172	0.108390576	-0.527673851	0.00306764	0.017848088
cg22306579	0.337751278	0.36854132	0.125865149	1.83471E-05	5.7986E-05	cg22306579	0.367641366	0.228469998	-0.686294376	4.76E-18	1.07E-17	cg22306579	0.3083333	0.519583814	0.752865782	1.96E-24	1.36E-23	cg22306579	0.357028148	0.263554175	-0.437938272	5.62E-06	1.59E-05	cg22306579	0.336386581	0.474912622	0.497541947	0.000632499	0.001513269	cg22306579	0.350342397	0.275475284	-0.346842702	0.002748939	0.009022159	cg22306579	0.353897599	0.29961823	-0.240206571	0.020655462	0.074476033
cg22493877	0.24094132	0.303910854	0.334966373	6.56469E-08	5.42116E-07	cg22493877	0.279807028	0.129558915	-1.110823904	2.82E-23	2.19E-22	cg22493877	0.221648699	0.415504234	0.906588283	3.48E-27	9.06E-26	cg22493877	0.268930515	0.163649782	-0.716621781	4.13E-09	8.46E-08	cg22493877	0.256365393	0.231834315	-0.145107399	0.496108668	0.547430255	cg22493877	0.2590971	0.204714841	-0.339877175	0.008408701	0.021526273	cg22493877	0.255254897	0.253267413	-0.011277178	0.526012536	0.70778799
cg22595230	0.3237248	0.437804776	0.4355198	9.98975E-09	2.55737E-07	cg22595230	0.39066476	0.139419972	-1.486493874	1.98E-21	8.16E-21	cg22595230	0.301312996	0.579436929	0.943388737	4.87E-26	6.04E-25	cg22595230	0.365413251	0.24241996	-0.592020457	3.04E-06	1.01E-05	cg22595230	0.354559556	0.261252091	-0.440585396	0.015347909	0.026193764	cg22595230	0.358198379	0.239118706	-0.583031812	0.000367068	0.001842539	cg22595230	0.345004446	0.368512684	0.095099324	0.455480524	0.656525518
cg22704780	0.417874343	0.451668447	0.11219495	0.024669052	0.034699325	cg22704780	0.457228307	0.264958986	-0.787145668	2.24E-17	4.70E-17	cg22704780	0.392385213	0.584624588	0.575239831	9.44E-20	2.28E-19	cg22704780	0.434770834	0.364182922	-0.255591893	0.000917356	0.001423292	cg22704780	0.412439748	0.631012301	0.613484755	5.07E-09	1.90E-07	cg22704780	0.425065146	0.429067701	0.013521334	0.727983495	0.824618472	cg22704780	0.438518931	0.36191009	-0.277007792	3.70E-05	0.000630689
cg22923006	0.734347666	0.749819445	0.030079992	0.707590442	0.742389972	cg22923006	0.753344796	0.65940468	-0.192146193	0.05353185	0.054381562	cg22923006	0.729605597	0.777247023	0.091256388	0.237268747	0.241034918	cg22923006	0.74048151	0.720195825	-0.040074476	0.926891188	0.930526056	cg22923006	0.729598802	0.86787378	0.250381878	6.01E-06	2.75E-05	cg22923006	0.726847387	0.868981143	0.257672391	6.89E-07	2.52E-05	cg22923006	0.752154447	0.668390506	-0.170337694	0.005830989	0.029534673
cg23075364	0.2736908	0.321634966	0.232877318	0.000176172	0.000399115	cg23075364	0.319821513	0.105600647	-1.598648316	2.42E-21	9.66E-21	cg23075364	0.238626152	0.504965174	1.081431729	9.86E-24	4.76E-23	cg23075364	0.30132472	0.173670218	-0.794968656	2.78E-06	9.63E-06	cg23075364	0.271974616	0.480768751	0.821871122	0.001489897	0.003345734	cg23075364	0.292762383	0.183132285	-0.676844038	0.002883626	0.009344408	cg23075364	0.291129332	0.251501547	-0.21109293	0.629779211	0.79813603
cg23120601	0.354752948	0.469764455	0.405122881	8.26859E-08	6.41442E-07	cg23120601	0.430067055	0.129525892	-1.731321097	1.13E-26	6.37E-25	cg23120601	0.332548072	0.610670675	0.876831659	3.14E-24	2.06E-23	cg23120601	0.396049008	0.27755556	-0.512902368	3.72E-05	7.74E-05	cg23120601	0.371120533	0.525801494	0.502630416	0.009685841	0.01758564	cg23120601	0.393750289	0.218548817	-0.849325413	4.29E-06	8.33E-05	cg23120601	0.380689223	0.378265119	-0.009215985	0.861118236	0.922369324
cg23152216	0.507948202	0.547996376	0.109484966	0.07589803	0.096666147	cg23152216	0.550935908	0.345110348	-0.674826762	5.50E-14	8.38E-14	cg23152216	0.489686185	0.647896099	0.403904978	1.97E-10	2.37E-10	cg23152216	0.529104789	0.436942275	-0.276110778	0.000608548	0.001005086	cg23152216	0.505587278	0.695667552	0.460437869	5.56E-06	2.68E-05	cg23152216	0.509639221	0.603179551	0.243111208	0.012736055	0.030940093	cg23152216	0.525936797	0.472893142	-0.153375219	0.015498206	0.057734504
cg23244095	0.465054152	0.469951263	0.015112431	0.959400715	0.966955051	cg23244095	0.486253533	0.364858754	-0.414370665	1.45E-06	1.54E-06	cg23244095	0.449799968	0.545027509	0.277045488	3.27E-06	3.52E-06	cg23244095	0.475915245	0.402498216	-0.241722281	0.002148193	0.003124644	cg23244095	0.455841062	0.629906438	0.466606668	6.01E-07	5.31E-06	cg23244095	0.459188922	0.549563195	0.259197553	0.004225618	0.012726566	cg23244095	0.472461507	0.435626976	-0.117103497	0.026137381	0.083639619
cg23285459	0.718101926	0.65162859	-0.14013873	0.001372575	0.002682284	cg23285459	0.711777805	0.6609216	-0.106947801	0.949264935	0.949264935	cg23285459	0.6827507	0.802806118	0.233692725	0.259028	0.262099478	cg23285459	0.728593738	0.538999681	-0.434830177	0.000955717	0.001473877	cg23285459	0.694677465	0.841275847	0.276235627	0.011709156	0.020531123	cg23285459	0.688406362	0.88269869	0.358660626	8.65E-08	7.39E-06	cg23285459	0.701704204	0.711306441	0.019608221	0.939392445	0.950531486
cg23288103	0.336173875	0.400265134	0.25174834	2.67868E-06	1.02349E-05	cg23288103	0.386202676	0.170079634	-1.18314776	4.04E-24	3.68E-23	cg23288103	0.306271836	0.563405171	0.879360095	8.81E-27	1.61E-25	cg23288103	0.36603164	0.248585415	-0.558226706	1.26E-06	5.27E-06	cg23288103	0.341881621	0.485762924	0.50675551	0.008206149	0.015446869	cg23288103	0.359577789	0.240205538	-0.582034495	7.71E-05	0.000563728	cg23288103	0.354888538	0.328703853	-0.110577611	0.697257077	0.839343321
cg23359895	0.054891846	0.047967842	-0.194524326	0.016792247	0.024564658	cg23359895	0.051919558	0.060586217	0.22271152	0.079697855	0.080642889	cg23359895	0.054271987	0.048930814	-0.149464439	0.177917266	0.181461434	cg23359895	0.052111751	0.06145335	0.237882943	0.096622039	0.113464413	cg23359895	0.053351284	0.053421767	0.001904709	0.518773339	0.567546901	cg23359895	0.053527187	0.051294661	-0.061463172	0.535671386	0.656133372	cg23359895	0.053556789	0.052383497	-0.031957088	0.932347432	0.947146598
cg23696248	0.6523342	0.684317125	0.069053782	0.090147186	0.11202757	cg23696248	0.685247877	0.529424602	-0.372200717	1.69E-08	1.98E-08	cg23696248	0.645992084	0.724308543	0.165087905	0.000430856	0.000446555	cg23696248	0.662863048	0.637084577	-0.057225919	0.142074236	0.160933648	cg23696248	0.647646585	0.846803244	0.386820033	4.86E-06	2.39E-05	cg23696248	0.65596241	0.701054122	0.095912683	0.36627741	0.473570793	cg23696248	0.667191913	0.621964543	-0.101269464	0.045208676	0.131516148
cg23725321	0.413415978	0.427478042	0.048256168	0.735676142	0.7687065	cg23725321	0.446708235	0.264598805	-0.755526306	1.86E-08	2.16E-08	cg23725321	0.396690072	0.512345437	0.369104551	4.83E-05	5.09E-05	cg23725321	0.440523357	0.260353594	-0.758746193	1.56E-07	1.02E-06	cg23725321	0.400222359	0.675927269	0.756066252	4.45E-08	6.70E-07	cg23725321	0.398957886	0.627476727	0.653325485	2.81E-07	1.80E-05	cg23725321	0.421940263	0.390447963	-0.111908477	0.22293887	0.416586502
cg23902550	0.482533679	0.494003398	0.033891324	0.547513488	0.592370863	cg23902550	0.506097534	0.379234071	-0.416326858	1.54E-10	1.94E-10	cg23902550	0.464090027	0.586403535	0.337489106	1.42E-13	1.98E-13	cg23902550	0.495468212	0.417431695	-0.247252355	5.16E-06	1.53E-05	cg23902550	0.477569183	0.604480619	0.33998634	4.45E-05	0.000135741	cg23902550	0.483897733	0.499250758	0.045062438	0.564950433	0.685437492	cg23902550	0.486261879	0.479367004	-0.020602887	0.548407653	0.723671955
cg23923934	0.718205976	0.598708101	-0.262544867	1.53227E-07	9.80653E-07	cg23923934	0.665227399	0.824949155	0.310457613	6.32E-11	8.09E-11	cg23923934	0.728464503	0.51415894	-0.502644271	1.18E-13	1.66E-13	cg23923934	0.673481563	0.810248476	0.26672595	2.59E-06	9.08E-06	cg23923934	0.682925942	0.831041489	0.283191366	0.001526664	0.003398488	cg23923934	0.68879054	0.7264858	0.076869269	0.172871173	0.261864025	cg23923934	0.688900431	0.705157906	0.033650875	0.671231197	0.839343321
cg23925513	0.346639751	0.431440089	0.31572313	4.19802E-07	2.12209E-06	cg23925513	0.398218274	0.200476926	-0.990123229	5.39E-20	1.60E-19	cg23925513	0.329869657	0.537254437	0.703709416	1.26E-24	9.22E-24	cg23925513	0.377969904	0.283979542	-0.41248436	4.55E-06	1.41E-05	cg23925513	0.362132756	0.41830224	0.208027045	0.146479614	0.18472306	cg23925513	0.374010424	0.262808036	-0.50906909	6.76E-05	0.000508812	cg23925513	0.366870018	0.358632004	-0.032764769	0.451921816	0.656525518
cg23964386	0.203848569	0.235996756	0.211269199	4.26664E-05	0.000117447	cg23964386	0.234565812	0.092220918	-1.34682682	9.49E-25	1.47E-23	cg23964386	0.186420807	0.329553525	0.821949914	3.44E-23	1.57E-22	cg23964386	0.221324758	0.143639474	-0.623712569	1.30E-05	3.11E-05	cg23964386	0.197955284	0.418107504	1.078699359	5.88E-06	2.75E-05	cg23964386	0.21632396	0.146879029	-0.558565046	0.000716869	0.003219623	cg23964386	0.216510763	0.184291666	-0.232447918	0.414672189	0.635665152
cg24179027	0.677203949	0.688503915	0.023874471	0.966874747	0.970666412	cg24179027	0.697200834	0.591639232	-0.236856575	5.31E-05	5.52E-05	cg24179027	0.661000638	0.770038852	0.220279572	2.75E-07	3.02E-07	cg24179027	0.681715662	0.666660961	-0.032216881	0.623034087	0.640549102	cg24179027	0.671383436	0.812124973	0.274564808	6.01E-06	2.75E-05	cg24179027	0.679450998	0.682835408	0.007168363	0.814203919	0.886489738	cg24179027	0.690813597	0.626114222	-0.141870608	0.000619377	0.005872615
cg24367850	0.822994266	0.865644539	0.072892352	0.021823097	0.031210687	cg24367850	0.849693485	0.745665528	-0.188413856	2.07E-08	2.36E-08	cg24367850	0.819209623	0.896416169	0.129936009	1.40E-07	1.56E-07	cg24367850	0.835863051	0.810287964	-0.044831878	0.126330028	0.145024606	cg24367850	0.828669613	0.892694779	0.107369969	0.003780716	0.007742906	cg24367850	0.834112885	0.812600475	-0.037696437	0.123415089	0.202068188	cg24367850	0.836132908	0.814717556	-0.037432288	0.107399835	0.2433129
cg24404823	0.406656123	0.441257371	0.11781104	0.070114706	0.090653357	cg24404823	0.449257597	0.238468228	-0.913745836	3.45E-10	4.31E-10	cg24404823	0.372332052	0.617101528	0.728918052	9.10E-12	1.17E-11	cg24404823	0.446022561	0.208005616	-1.100494204	6.32E-10	2.00E-08	cg24404823	0.405155357	0.560272981	0.467654705	0.021908565	0.035053703	cg24404823	0.400569521	0.579506635	0.532772525	0.003392414	0.01059095	cg24404823	0.420976061	0.382268381	-0.139152323	0.574278129	0.746270056
cg24408057	0.313889973	0.378510943	0.270076067	8.36656E-06	2.85579E-05	cg24408057	0.366105153	0.137495184	-1.412876993	1.09E-24	1.47E-23	cg24408057	0.285227053	0.535824286	0.909649149	9.41E-26	1.00E-24	cg24408057	0.344589501	0.221703551	-0.636246868	1.11E-07	8.64E-07	cg24408057	0.320365153	0.453263241	0.500631935	0.0068831	0.013052396	cg24408057	0.331735921	0.286145231	-0.213287675	0.132302438	0.210369094	cg24408057	0.334455572	0.298169366	-0.165682539	0.257784029	0.458282718
cg24766690	0.430130004	0.455884771	0.083896446	0.000125392	0.000291821	cg24766690	0.454431857	0.342245805	-0.409031121	8.04E-19	2.04E-18	cg24766690	0.407671397	0.571854443	0.488241238	4.72E-26	6.04E-25	cg24766690	0.442855485	0.390197595	-0.182631102	0.00063096	0.001028826	cg24766690	0.432949195	0.481885248	0.154491897	0.036070046	0.05463865	cg24766690	0.441009599	0.373867462	-0.23828314	8.63E-05	0.000597165	cg24766690	0.440863683	0.41161582	-0.099034206	0.132660774	0.283009652
cg24768595	0.455262612	0.561499849	0.30258665	0.000553269	0.001180307	cg24768595	0.522552142	0.258693782	-1.014329622	1.43E-13	2.14E-13	cg24768595	0.417095976	0.776891078	0.897332951	6.63E-22	2.36E-21	cg24768595	0.496316735	0.365016718	-0.443298561	0.001389878	0.002092993	cg24768595	0.477369645	0.502150424	0.07301277	0.724314608	0.750706638	cg24768595	0.487482866	0.375073133	-0.378179587	0.031018546	0.064558925	cg24768595	0.492427447	0.413221904	-0.252994446	0.05122882	0.142549759
cg24915511	0.175885626	0.169344798	-0.054673915	0.117658316	0.14343109	cg24915511	0.186110055	0.115638283	-0.68653691	3.16E-14	4.97E-14	cg24915511	0.159562508	0.246228914	0.625878475	8.12E-21	2.34E-20	cg24915511	0.182567805	0.12147583	-0.587763087	1.80E-08	1.85E-07	cg24915511	0.16597828	0.308884314	0.896072145	1.53E-06	1.06E-05	cg24915511	0.172913951	0.192677944	0.156137163	0.584888009	0.699679114	cg24915511	0.178970021	0.152537474	-0.23055423	0.252237469	0.457963064
cg25004071	0.492089797	0.51888865	0.076503376	0.107056577	0.131131501	cg25004071	0.531580062	0.329119425	-0.691675814	8.80E-12	1.18E-11	cg25004071	0.457963944	0.691488981	0.594472244	1.90E-18	3.80E-18	cg25004071	0.516238383	0.379520422	-0.443859894	1.47E-07	1.02E-06	cg25004071	0.487286476	0.668958299	0.457146097	7.80E-05	0.000224365	cg25004071	0.496086087	0.521438696	0.071907152	0.61686238	0.729462934	cg25004071	0.505245316	0.463234082	-0.125242641	0.057517007	0.153378685
cg25141995	0.635823578	0.67045928	0.076523197	0.289307956	0.330637664	cg25141995	0.675800203	0.48089982	-0.490860398	2.70E-13	3.98E-13	cg25141995	0.617359389	0.769748588	0.318276733	3.49E-10	4.19E-10	cg25141995	0.659790609	0.537497744	-0.295749545	2.59E-06	9.08E-06	cg25141995	0.63803336	0.730571929	0.195394464	0.008857206	0.016430759	cg25141995	0.633315589	0.765830128	0.274099826	5.13E-05	0.000425677	cg25141995	0.644895266	0.636816769	-0.018186552	0.616208871	0.792710909
cg25221637	0.51165092	0.527970289	0.045296896	0.631522747	0.670829142	cg25221637	0.544739477	0.366882697	-0.570247555	2.79E-12	3.84E-12	cg25221637	0.484854477	0.662115688	0.449531506	9.80E-16	1.61E-15	cg25221637	0.522651924	0.467221107	-0.16174501	0.019378823	0.024929541	cg25221637	0.50408092	0.693211551	0.459640347	4.94E-07	4.52E-06	cg25221637	0.517167559	0.492526353	-0.07043086	0.52064577	0.640794793	cg25221637	0.522288495	0.481399741	-0.11761156	0.024308647	0.082973515
cg25446191	0.892725969	0.90288798	0.016329611	0.045062081	0.059771465	cg25446191	0.900548842	0.866942052	-0.054868959	0.046536708	0.047463734	cg25446191	0.890019476	0.918932329	0.046121718	0.563262601	0.565471474	cg25446191	0.900216027	0.860894052	-0.064435551	0.283168817	0.305870115	cg25446191	0.891839113	0.944934521	0.08343089	1.03E-05	4.00E-05	cg25446191	0.891830972	0.932779422	0.064765659	0.005139775	0.014619803	cg25446191	0.898052201	0.880153658	-0.029043895	0.859958297	0.922369324
cg25591888	0.35785641	0.370150801	0.048732329	0.151362583	0.180227076	cg25591888	0.382172063	0.251875432	-0.601511909	6.79E-08	7.69E-08	cg25591888	0.325323894	0.530807853	0.706312926	9.50E-15	1.44E-14	cg25591888	0.374427386	0.270451592	-0.469315572	0.000168538	0.000303843	cg25591888	0.356388974	0.427292608	0.261771655	0.32002964	0.374098574	cg25591888	0.360840855	0.357507659	-0.013388542	0.562129106	0.685262149	cg25591888	0.366659152	0.331258331	-0.146482813	0.407947919	0.631707553
cg25635864	0.168447573	0.220028705	0.385392107	4.11043E-07	2.12209E-06	cg25635864	0.201509282	0.071040125	-1.504140275	8.62E-20	2.48E-19	cg25635864	0.148267507	0.33256832	1.165448278	1.62E-25	1.59E-24	cg25635864	0.192772613	0.096033087	-1.005296652	1.22E-08	1.49E-07	cg25635864	0.180982973	0.162563965	-0.154846475	0.157957932	0.198221718	cg25635864	0.184595476	0.123464465	-0.580271323	0.007475314	0.019728665	cg25635864	0.180543595	0.176752722	-0.030614807	0.386547148	0.614751781
cg25900902	0.539267035	0.657708778	0.28644908	9.01366E-05	0.000221875	cg25900902	0.621685064	0.282860725	-1.136092046	2.12E-24	2.17E-23	cg25900902	0.517807505	0.796022192	0.620392775	8.24E-21	2.34E-20	cg25900902	0.587108738	0.425167298	-0.465597094	1.30E-06	5.27E-06	cg25900902	0.557270782	0.697163993	0.323119546	0.004657073	0.009314146	cg25900902	0.566207101	0.557645122	-0.021982541	0.798031419	0.873060014	cg25900902	0.56754367	0.55591657	-0.029863019	0.396337987	0.618673931
cg26099902	0.609746169	0.706593184	0.212671045	0.000954833	0.001924703	cg26099902	0.670998015	0.431005196	-0.638603235	6.38E-14	9.66E-14	cg26099902	0.592093261	0.820200314	0.470151864	3.78E-19	8.42E-19	cg26099902	0.637536236	0.590213645	-0.11127007	0.039908071	0.049354909	cg26099902	0.624982592	0.730663352	0.225390843	0.018256924	0.02996008	cg26099902	0.639239948	0.535187208	-0.256313936	0.004879969	0.014036765	cg26099902	0.642107666	0.57875146	-0.149871295	0.004749143	0.026430014
cg26136365	0.248821444	0.29203815	0.23104602	3.48167E-05	9.90341E-05	cg26136365	0.281704012	0.141113746	-0.997321578	3.22E-21	1.21E-20	cg26136365	0.235299102	0.369985388	0.65297248	1.72E-20	4.69E-20	cg26136365	0.267842288	0.197002464	-0.443170081	4.37E-06	1.38E-05	cg26136365	0.253848178	0.330959035	0.382686751	0.161460322	0.201628499	cg26136365	0.259120893	0.24989164	-0.052322704	0.773936367	0.85399875	cg26136365	0.261592349	0.243052472	-0.106052543	0.293514291	0.500931056
cg26299084	0.238624394	0.284143512	0.25187824	8.81553E-05	0.000219105	cg26299084	0.272952774	0.126719586	-1.107011834	1.09E-19	3.07E-19	cg26299084	0.219348242	0.390542607	0.832256809	3.70E-18	7.17E-18	cg26299084	0.259416434	0.179110305	-0.53442153	2.17E-05	4.82E-05	cg26299084	0.245889549	0.29380512	0.256849121	0.234892416	0.278391011	cg26299084	0.250287926	0.229967157	-0.122160857	0.092849292	0.157413369	cg26299084	0.253477656	0.225779919	-0.166941401	0.829913042	0.903992418
cg26418434	0.253510186	0.351628089	0.472006606	1.27691E-07	8.83483E-07	cg26418434	0.311083148	0.094997107	-1.711344758	1.67E-20	5.40E-20	cg26418434	0.238648574	0.452132498	0.921857902	3.76E-21	1.14E-20	cg26418434	0.28850818	0.189164198	-0.608973163	0.000132021	0.00024141	cg26418434	0.26746335	0.399597024	0.579204624	0.180623365	0.221126423	cg26418434	0.287114081	0.133295857	-1.106992147	6.84E-06	0.000109474	cg26418434	0.27816304	0.261373007	-0.089820582	0.748125244	0.846225338
cg26617637	0.476729142	0.535016628	0.166413912	0.00397439	0.006921387	cg26617637	0.527245689	0.300405842	-0.811562522	4.41E-17	8.89E-17	cg26617637	0.452617046	0.668504113	0.562645518	1.27E-19	2.99E-19	cg26617637	0.503854992	0.397255527	-0.342941297	1.14E-05	2.87E-05	cg26617637	0.484996134	0.563862043	0.217368982	0.084818834	0.116115623	cg26617637	0.485307636	0.541924195	0.159191502	0.275064695	0.380630064	cg26617637	0.496307077	0.457586723	-0.117187834	0.064434095	0.168317635
cg26672452	0.696534799	0.756994152	0.120086723	0.015778513	0.023621634	cg26672452	0.730193596	0.608011061	-0.264181446	1.49E-07	1.65E-07	cg26672452	0.696794678	0.773460405	0.150593833	0.000402954	0.000419334	cg26672452	0.71239876	0.694008371	-0.03773194	0.601192345	0.620585646	cg26672452	0.703050086	0.819664306	0.221405701	4.05E-06	2.07E-05	cg26672452	0.706257347	0.754266203	0.094879814	0.092443949	0.157413369	cg26672452	0.724708816	0.638702501	-0.182257344	3.83E-06	8.92E-05
cg26741686	0.414377943	0.471347807	0.185844802	0.007438119	0.01197584	cg26741686	0.477915002	0.170722395	-1.485101739	4.89E-20	1.49E-19	cg26741686	0.376591278	0.670464255	0.832160833	1.38E-17	2.52E-17	cg26741686	0.454548353	0.247773718	-0.875410607	8.86E-09	1.33E-07	cg26741686	0.422816848	0.493836348	0.224000161	0.350789953	0.404100378	cg26741686	0.413095668	0.594101395	0.524233247	0.001235515	0.004720772	cg26741686	0.429541596	0.414842029	-0.05023578	0.893709182	0.9338349
cg26897283	0.276373239	0.335304827	0.278855326	8.34464E-07	3.88405E-06	cg26897283	0.318579642	0.142760088	-1.158061381	1.35E-26	6.37E-25	cg26897283	0.263884897	0.412866426	0.645766321	1.47E-21	4.84E-21	cg26897283	0.299543038	0.223731416	-0.42099545	1.06E-05	2.69E-05	cg26897283	0.281174774	0.421022295	0.582429467	0.000804552	0.001872412	cg26897283	0.295858654	0.212543221	-0.477151848	0.000110821	0.000709252	cg26897283	0.289654154	0.288463117	-0.005944484	0.871570877	0.925818027
cg27048142	0.721751266	0.767323922	0.088333999	0.311818035	0.35320981	cg27048142	0.763427262	0.572917666	-0.414162881	5.33E-08	6.06E-08	cg27048142	0.710011709	0.83735515	0.23799683	1.71E-07	1.89E-07	cg27048142	0.74755029	0.62972538	-0.247447824	0.00019838	0.000350244	cg27048142	0.72371463	0.861431248	0.251314722	0.000116332	0.000327262	cg27048142	0.728109365	0.776913669	0.09359913	0.337120757	0.447165357	cg27048142	0.728447516	0.7483547	0.038897199	0.473508717	0.666034239
cg27285720	0.57022755	0.351795936	-0.696798928	1.15127E-08	2.67932E-07	cg27285720	0.465191543	0.80661653	0.794058102	8.81E-18	1.91E-17	cg27285720	0.577840601	0.251020217	-1.202868016	4.37E-14	6.36E-14	cg27285720	0.51567266	0.561387811	0.122542181	0.438328962	0.461778659	cg27285720	0.505177501	0.785404786	0.636646003	2.30E-05	7.65E-05	cg27285720	0.510020212	0.662624417	0.377636946	0.012439625	0.030917902	cg27285720	0.515404198	0.552437334	0.100106532	0.800114484	0.879095743
cg27313492	0.696132796	0.711547775	0.031598082	0.568217278	0.608634407	cg27313492	0.714547846	0.62404493	-0.195380713	2.35E-07	2.57E-07	cg27313492	0.683908889	0.775077923	0.180537219	1.73E-11	2.22E-11	cg27313492	0.705792199	0.65893098	-0.099116127	0.006213023	0.00859748	cg27313492	0.69431788	0.782796131	0.173040301	2.83E-05	9.19E-05	cg27313492	0.698559086	0.7114836	0.026448354	0.767546588	0.85399875	cg27313492	0.703833961	0.678887921	-0.052061711	0.027559868	0.087102791
cg27518898	0.231398136	0.248972445	0.105608842	0.011087678	0.017164674	cg27518898	0.261857028	0.101552879	-1.366548178	3.88E-19	1.02E-18	cg27518898	0.210422063	0.355387334	0.756106284	2.62E-14	3.85E-14	cg27518898	0.249059857	0.14569122	-0.773578575	1.69E-06	6.44E-06	cg27518898	0.223202934	0.427605499	0.937924414	2.53E-05	8.30E-05	cg27518898	0.228694722	0.314534225	0.459793936	0.013425986	0.03153259	cg27518898	0.243780231	0.194347902	-0.326939605	0.095108247	0.22752996
cg27529346	0.728133271	0.627253958	-0.215152863	8.51792E-07	3.89391E-06	cg27529346	0.682240404	0.824130416	0.27259246	4.02E-11	5.20E-11	cg27529346	0.737697493	0.551513778	-0.419632406	4.41E-13	5.91E-13	cg27529346	0.690049067	0.807971565	0.22760557	1.29E-05	3.11E-05	cg27529346	0.6985043	0.820936496	0.233001629	0.003056892	0.006467475	cg27529346	0.702866385	0.740337884	0.074933395	0.113088158	0.187990704	cg27529346	0.704319231	0.712650217	0.016964673	0.454589371	0.656525518
