# Supplementary material for: Identification of Melanoma Subsets Based on DNA Methylation Sites and Construction of a Prognosis Evaluation Model
Source: J Oncol. 2022 Oct 11;2022:6608650. doi: 10.1155/2022/6608650 (PMC9578801; doi:10.1155/2022/6608650)
Supplement: Supplementary Materials — Supplementary Table 1. Prognosis-related methylation sites by univariate Cox regression analysis (783 sites were found, P < 0.0001). Supplementary Table 2. Multivariate Cox regression analysis of the 783 methylation sites (256 sites were found, P < 0.0001). Supplementary Table 3. Level of the 256 sites in 338 samples and the follow-up. Supplementary Table 4. Analysis of differences in methylation site levels between the 7 clusters. Supplementary Table 5. Risk assessment. Supplementary Table 6. Testing the prediction model in 60% of the samples (randomly) for 100 times. Supplementary Table 7. Functional enrichment analysis of genes and 28 pathways were observed. Supplementary Table 8. The correlation coefficients between the expression levels of the 35 hub genes (∗∗P < 0.01, ∗P < 0.05). Supplementary Table 9. The correlation coefficients of the critical genes validated in the testing group (∗∗P < 0.01). Figure S1. The clinical features in different DNA methylation subgroups. The clinical T categories (a), N stage (b), and M status (c) of different subtypes. The tumor stage (d), patient ages (e), and gender (f) in different subtypes. C, cluster; T, primary tumor; N, lymph node involvement; M, distant metastases. [file 6608650.f1.zip › Supplementary Table 5. Risk assessment.txt]

Supplementary Table 5. Risk assessment
ID	survival time	survival state	cg00622799	cg00637477	cg02717339	cg02736280	cg04020309	cg04638014	cg04803153	cg07343703	cg09468328	cg11274940	cg13206063	cg13646917	cg13857119	cg14091103	cg14809332	cg23075364	cg23288103	cg24408057	cg26418434	cg00089550	cg01328833	riskScore	risk
TCGA-3N-A9WD	1.082191781	1	0.266506976	0.220789703	0.476698334	0.577634537	0.220734557	0.207681011	0.266628261	0.353838652	0.259048622	0.37117992	0.459799461	0.205232445	0.296421308	0.331954695	0.322731052	0.291160294	0.347924456	0.306391127	0.334843589	0.357839625	0.337719143	-2.292290755	high
TCGA-BF-A1PU	1.060273973	0	0.042573383	0.744928517	0.108374127	0.191508284	0.316719875	0.053254756	0.087878247	0.264359554	0.118523729	0.163103624	0.088686554	0.038272991	0.173070377	0.095940324	0.136213053	0.078365767	0.127115608	0.091264933	0.045837445	0.121021638	0.146022671	-1.737136231	high
TCGA-BF-A1PX	0.77260274	1	0.343273958	0.535164591	0.555975241	0.660042123	0.434868505	0.598215703	0.494899425	0.715525523	0.40724547	0.448973359	0.562652422	0.249018693	0.532007371	0.530757248	0.500454066	0.464563026	0.535376677	0.453299611	0.448161905	0.484422769	0.524711039	-2.592527932	low
TCGA-BF-A1PZ	2.336986301	0	0.088605544	0.105894651	0.298501236	0.271897851	0.213920747	0.096160193	0.124716935	0.17038571	0.19780578	0.242757709	0.299770928	0.072197253	0.183085601	0.131464931	0.197597822	0.110095276	0.206864008	0.178985199	0.187727207	0.219993564	0.201130246	-1.465713975	high
TCGA-BF-A1Q0	2.276712329	0	0.178169276	0.439495204	0.776367732	0.542766855	0.712771055	0.626402254	0.254829073	0.606176359	0.303403221	0.425184152	0.74490046	0.117309715	0.573508647	0.270143754	0.302018713	0.210613265	0.407387473	0.336783927	0.329832419	0.32571839	0.367459139	-3.554533087	low
TCGA-BF-A3DJ	1.271232877	0	0.14460478	0.192705095	0.279398841	0.41078398	0.158739	0.130083045	0.131310478	0.263907667	0.208851442	0.350012111	0.300850267	0.074930351	0.243177041	0.204214751	0.167244283	0.1827996	0.313348897	0.23695938	0.266534579	0.335872814	0.304319481	-2.08796401	high
TCGA-BF-A3DL	2.106849315	0	0.061714994	0.063365719	0.287561945	0.520908232	0.095269315	0.070696348	0.266530365	0.158810078	0.178743079	0.358041279	0.219781864	0.094960596	0.402178345	0.208980094	0.316108363	0.15104929	0.308944838	0.296963033	0.263117972	0.355674648	0.353193753	-0.883607347	high
TCGA-BF-A3DM	1.646575342	0	0.106311977	0.057945112	0.239812667	0.270577597	0.043526245	0.07957044	0.054794687	0.13653254	0.112063814	0.201425645	0.119981848	0.044292757	0.115151438	0.065010748	0.105828942	0.059946191	0.133423666	0.116310442	0.090982678	0.187386392	0.183544045	-1.182948705	high
TCGA-BF-A3DN	1.964383562	0	0.183788084	0.133253491	0.298942189	0.574158462	0.242072518	0.10140702	0.117310349	0.323166749	0.169952662	0.277814898	0.263258478	0.113952799	0.20734538	0.131445997	0.231492835	0.285303941	0.251241367	0.181428345	0.382953536	0.436929463	0.245417759	-2.201651214	high
TCGA-BF-A5EO	1.926027397	0	0.244088705	0.205339205	0.482265237	0.669047809	0.265357197	0.190714889	0.253439815	0.33937643	0.271048312	0.454404067	0.474082142	0.172866938	0.35146841	0.325517173	0.346027887	0.279112347	0.453627932	0.441253866	0.398510476	0.426706153	0.521336321	-2.46589652	low
TCGA-BF-A5EP	0.917808219	0	0.203142905	0.309522922	0.227404997	0.452155925	0.178538495	0.45323593	0.423893597	0.173387272	0.115144173	0.233628492	0.193970097	0.429573928	0.28809831	0.24678882	0.37975932	0.388736207	0.205944557	0.256875341	0.096382363	0.236024602	0.309058982	-0.847287608	high
TCGA-BF-A5EQ	0.884931507	0	0.178285017	0.582438416	0.529410426	0.494450188	0.751474438	0.517148741	0.460380941	0.859886599	0.255212877	0.477863755	0.442829193	0.424945711	0.410954983	0.560249395	0.59247793	0.377682393	0.543171325	0.370545727	0.414861835	0.455058508	0.385555705	-1.948234281	high
TCGA-BF-A5ER	0.895890411	0	0.653782757	0.693933899	0.690100449	0.41089399	0.360992768	0.83197804	0.530072532	0.903998135	0.133604116	0.269350385	0.308404593	0.409531777	0.232436553	0.216021546	0.662732242	0.124220873	0.36323138	0.780900112	0.141350624	0.197086009	0.760643677	-1.884721731	high
TCGA-BF-A5ES	1.342465753	0	0.12711695	0.456537397	0.438990329	0.52343008	0.733227357	0.240448726	0.252089668	0.809163486	0.483607135	0.482625741	0.320862464	0.337310082	0.498986145	0.414850408	0.510887489	0.259710612	0.443715145	0.763949914	0.28227725	0.302209317	0.767641741	-2.279938179	high
TCGA-BF-A9VF	1.205479452	0	0.052044548	0.086907429	0.113472383	0.147578366	0.529553775	0.054593423	0.932702104	0.464868068	0.727365706	0.149831054	0.142899052	0.407256862	0.11530811	0.162665966	0.159958012	0.150338735	0.502975146	0.096582494	0.044175761	0.160633382	0.142934506	-4.098337699	low
TCGA-BF-AAOU	1.304109589	0	0.137383721	0.40752984	0.416137598	0.70486096	0.615064795	0.38947452	0.48166633	0.547378885	0.364244676	0.417863298	0.258284854	0.211979342	0.437918645	0.277204992	0.292983314	0.244650128	0.410950641	0.338744012	0.33023778	0.26842054	0.363959518	-4.626362997	low
TCGA-BF-AAOX	1.216438356	0	0.144793752	0.172486614	0.336409581	0.552789318	0.1318034	0.078373624	0.168977664	0.113537961	0.204312386	0.413797759	0.260150803	0.100400403	0.324414581	0.253528336	0.196418459	0.095900901	0.26818367	0.213646693	0.224296279	0.240360969	0.27801014	-2.889547656	low
TCGA-BF-AAP1	1.120547945	0	0.07112797	0.054822851	0.255965355	0.900860075	0.106357362	0.070004106	0.058174629	0.20536615	0.218404601	0.283018933	0.404002427	0.236520681	0.118453348	0.083640719	0.107452115	0.084968162	0.238511605	0.131715822	0.069237827	0.137697256	0.145145637	-4.202844648	low
TCGA-BF-AAP2	1.109589041	0	0.153719281	0.160797022	0.448460082	0.366404069	0.172664174	0.068753581	0.169762245	0.277256076	0.192163783	0.268958142	0.309934566	0.105654511	0.193469597	0.182561289	0.295795517	0.119287968	0.266538489	0.200500928	0.20307713	0.208509469	0.257450405	-1.399809357	high
TCGA-BF-AAP4	0.917808219	0	0.236994434	0.45159888	0.425853087	0.568522686	0.279498648	0.21909852	0.47672466	0.716906423	0.352937796	0.392445681	0.549791945	0.186369186	0.389680538	0.581706827	0.350235357	0.391712393	0.430588083	0.356916191	0.39141282	0.403257466	0.407988254	-2.593991238	low
TCGA-BF-AAP6	0.890410959	0	0.058112044	0.088917505	0.198864877	0.473986584	0.133022265	0.048275242	0.111734035	0.100734484	0.143853105	0.226883564	0.251346348	0.075520051	0.141433768	0.170309806	0.146799724	0.08542108	0.157145218	0.138623038	0.160226318	0.145970299	0.152414937	-2.215366025	high
TCGA-BF-AAP7	0.871232877	0	0.314900264	0.395183486	0.488453192	0.590814691	0.382792383	0.315320376	0.494089885	0.548202141	0.322750834	0.449898297	0.513999814	0.199181115	0.417685401	0.491905537	0.358199727	0.367578955	0.399671074	0.398076663	0.387112034	0.339983759	0.455822938	-3.55752356	low
TCGA-BF-AAP8	1.224657534	0	0.114903003	0.127005737	0.604107688	0.380700905	0.198437067	0.454603945	0.186526732	0.660552974	0.160542342	0.211260792	0.277661844	0.09029406	0.155532275	0.23284609	0.168207048	0.083377995	0.14953985	0.225067522	0.15080054	0.129465355	0.291789195	-2.421135735	low
TCGA-D3-A1Q1	1.380821918	1	0.128016398	0.05608353	0.103963182	0.159904281	0.147215554	0.050239219	0.149418782	0.301442823	0.093208352	0.14298382	0.080230802	0.055162937	0.123135405	0.066446069	0.097670658	0.047359704	0.165410538	0.096947937	0.031314941	0.119303309	0.126340808	-0.934582663	high
TCGA-D3-A1Q3	1.389041096	1	0.266974422	0.644548105	0.828108762	0.845802302	0.733303782	0.215888486	0.671093952	0.88350486	0.329461387	0.411790342	0.459919817	0.209276213	0.54680521	0.38609701	0.435261947	0.694457838	0.402670799	0.78629593	0.533195012	0.542720147	0.713800201	-1.730888283	high
TCGA-D3-A1Q4	9.336986301	0	0.395417532	0.197352275	0.362557618	0.618496254	0.205184944	0.13692401	0.400005479	0.40047745	0.237770937	0.322069902	0.3053567	0.128106001	0.386551956	0.302636228	0.210613231	0.190820461	0.303274377	0.293414165	0.287272004	0.297993626	0.310519557	-3.143504311	low
TCGA-D3-A1Q6	5.983561644	1	0.16913476	0.18093112	0.544012818	0.847205193	0.18957408	0.121665407	0.370039408	0.735869394	0.304664851	0.389459766	0.502050319	0.206615298	0.555559287	0.403805348	0.366445967	0.386128173	0.386014043	0.368517907	0.397919674	0.51957952	0.400916789	-1.728625461	high
TCGA-D3-A1Q7	11.10410959	0	0.332639339	0.565620895	0.550726492	0.61843333	0.404290612	0.33524343	0.510771985	0.729314198	0.43251038	0.468204366	0.521040074	0.297200496	0.527477685	0.561088938	0.443683179	0.433723004	0.516826767	0.496060395	0.373686159	0.457137095	0.542087948	-2.364806509	low
TCGA-D3-A1Q8	2.339726027	1	0.152010474	0.175586379	0.431593373	0.542789564	0.231980986	0.164236435	0.352434038	0.429498524	0.26377306	0.402395106	0.459270838	0.270151927	0.376728898	0.4631469	0.344494666	0.299097144	0.403903109	0.38058653	0.282084019	0.340633407	0.392001517	-1.282662764	high
TCGA-D3-A1Q9	2.632876712	1	0.19207773	0.559793509	0.335222334	0.413103965	0.681996119	0.150006095	0.221962898	0.261163012	0.271645236	0.28981698	0.442338401	0.124170324	0.29516305	0.287430767	0.2482745	0.284649976	0.254861222	0.288429579	0.292881166	0.398578991	0.364922377	-2.418905082	low
TCGA-D3-A1QA	7.575342466	0	0.526935567	0.89257645	0.908795317	0.329659731	0.146927103	0.901057578	0.642545289	0.181533433	0.144599071	0.530650235	0.55607622	0.706656949	0.440575255	0.825914907	0.163535454	0.099160414	0.521631141	0.139766094	0.114488099	0.217606802	0.168758222	-3.535932635	low
TCGA-D3-A1QB	7.978082192	0	0.368223061	0.452020958	0.533274073	0.634537628	0.397778329	0.430889374	0.538596297	0.649147517	0.475641767	0.518267287	0.557321064	0.269819937	0.541201096	0.530378324	0.300933855	0.457457967	0.558867352	0.597012048	0.333855395	0.465844204	0.686071032	-3.058856691	low
TCGA-D3-A2J6	3.619178082	1	0.18823776	0.240530708	0.616481393	0.516257772	0.247490865	0.121559409	0.295036212	0.385955899	0.243072422	0.349782763	0.482708639	0.196259869	0.30284097	0.289114648	0.270331108	0.27032588	0.348034234	0.309008152	0.321570673	0.400654165	0.317366237	-1.552025586	high
TCGA-D3-A2J7	8.591780822	1	0.313907034	0.702779785	0.489459993	0.88629755	0.698283351	0.336503353	0.495612816	0.872353574	0.391442575	0.455339212	0.55619388	0.258398781	0.641198273	0.479577854	0.481206244	0.406422603	0.446589908	0.411075031	0.433373136	0.470212718	0.451090755	-4.267187342	low
TCGA-D3-A2J8	5.457534247	1	0.292187972	0.361551334	0.670722479	0.756004517	0.330288148	0.46986597	0.470851699	0.507581964	0.390590493	0.525610287	0.540586362	0.242031255	0.592312995	0.517177703	0.44914645	0.404838763	0.600606043	0.529168447	0.403550162	0.407483572	0.574882714	-2.091889714	high
TCGA-D3-A2J9	1.980821918	1	0.291067315	0.404014596	0.653350142	0.723966625	0.49368574	0.486057008	0.660776223	0.548821881	0.456977105	0.528566106	0.658132215	0.258315924	0.640354842	0.646982059	0.562566233	0.586451501	0.557130787	0.557172485	0.522778639	0.539592019	0.617197122	-2.023184147	high
TCGA-D3-A2JA	9.62739726	0	0.224999565	0.182885162	0.348856656	0.832784857	0.243704355	0.153449467	0.255947892	0.313837609	0.244985174	0.368936862	0.390312566	0.171046287	0.429178301	0.273730346	0.312690581	0.417823885	0.345100464	0.312448531	0.322694935	0.3628017	0.349346529	-2.176040916	high
TCGA-D3-A2JC	7.230136986	0	0.214958724	0.276079831	0.62679579	0.528221126	0.306034996	0.233867891	0.418457195	0.850332474	0.352777407	0.47782615	0.541871817	0.167292042	0.44024171	0.399089102	0.359784548	0.403923202	0.435906739	0.38274043	0.352856898	0.372115932	0.441693409	-2.706277522	low
TCGA-D3-A2JD	0.989041096	1	0.209958333	0.313655068	0.40981947	0.622644421	0.286626717	0.335469823	0.405580982	0.568084593	0.339828907	0.551358726	0.496924211	0.215998948	0.410089465	0.511700272	0.416173881	0.374027995	0.614046999	0.47649593	0.241466723	0.384086605	0.55059424	-1.547017193	high
TCGA-D3-A2JF	5.17260274	0	0.238916314	0.278629508	0.40397407	0.756085532	0.681195152	0.199444401	0.269301217	0.516528141	0.312525324	0.40635136	0.537096686	0.165490224	0.513101571	0.292066348	0.290000346	0.307914344	0.361843098	0.299752145	0.256743491	0.375110065	0.328181305	-3.248054525	low
TCGA-D3-A2JG	9.460273973	1	0.427327869	0.287621898	0.412898962	0.450287721	0.14354851	0.633412369	0.169867714	0.49749838	0.176002959	0.295641186	0.660217467	0.478609338	0.27440803	0.381254791	0.268623712	0.165573387	0.489360283	0.246523222	0.196155353	0.264421322	0.284804804	-2.57281746	low
TCGA-D3-A2JH	3.506849315	0	0.340946901	0.438611802	0.549146315	0.648649788	0.54051006	0.490828916	0.626729239	0.703152337	0.538032436	0.477632226	0.640040841	0.271481602	0.542527594	0.638486982	0.478419928	0.554690284	0.594397019	0.519146016	0.386823988	0.49469081	0.594961513	-2.26215161	high
TCGA-D3-A2JK	1.008219178	1	0.132454107	0.179954047	0.34371721	0.479267872	0.520475645	0.20276476	0.194352968	0.354588899	0.26499414	0.443100705	0.283031775	0.187439325	0.442614214	0.297301799	0.307569059	0.248420125	0.444956375	0.260262508	0.230416665	0.2925971	0.295952811	-1.594139302	high
TCGA-D3-A2JN	5.539726027	1	0.440237173	0.367154139	0.521824928	0.664970209	0.307441862	0.360213217	0.769192336	0.602033154	0.336527043	0.352291547	0.594794357	0.192010429	0.621005127	0.452118033	0.37077412	0.352984912	0.36463201	0.398236648	0.387456681	0.388948909	0.412069587	-3.560405441	low
TCGA-D3-A2JP	4.964383562	0	0.229139412	0.218764101	0.416521952	0.471926746	0.284127771	0.187154582	0.213674819	0.384606531	0.34313479	0.407268147	0.471690506	0.17300433	0.368109517	0.3083014	0.306124102	0.271006497	0.392093505	0.306210148	0.289664978	0.403905619	0.320340308	-1.824364627	high
TCGA-D3-A3BZ	10.89315068	0	0.264318169	0.413700507	0.488008043	0.670302544	0.557258978	0.326444078	0.504420344	0.690136552	0.375894214	0.527414768	0.548983494	0.246331613	0.52695935	0.528452157	0.44919253	0.379179302	0.536432456	0.500095519	0.376161414	0.45491626	0.532202629	-2.72919269	low
TCGA-D3-A3C6	4.838356164	1	0.15636477	0.151976898	0.228717614	0.903367522	0.081885912	0.057108792	0.089822347	0.248410627	0.186420293	0.257229523	0.151383715	0.05721103	0.210314378	0.138979754	0.155388384	0.083680816	0.220026306	0.142607107	0.08066923	0.150970076	0.163226474	-2.930903122	low
TCGA-D3-A3C7	3.915068493	0	0.135954353	0.165038422	0.363403693	0.401612911	0.184733139	0.348195928	0.17628036	0.4943976	0.260425114	0.337686136	0.358745936	0.140907072	0.351702519	0.262661512	0.313540093	0.238396444	0.274733934	0.260247913	0.254764535	0.319352687	0.276682935	-1.585580104	high
TCGA-D3-A3CC	7.243835616	0	0.348522497	0.217505021	0.729845121	0.832493961	0.670388679	0.098831236	0.20196412	0.352655569	0.161527001	0.311672311	0.219217287	0.139357797	0.240670257	0.233824482	0.243241315	0.369082681	0.225776548	0.25440374	0.404475765	0.373870907	0.289064668	-2.745683486	low
TCGA-D3-A3CE	5.019178082	1	0.211072135	0.329793311	0.430717494	0.415789955	0.219098269	0.25170762	0.504200546	0.456330415	0.329866615	0.348987994	0.440822807	0.126221314	0.377919813	0.349963018	0.272907412	0.201268562	0.340439628	0.290607554	0.18355724	0.283939958	0.357610871	-2.522989507	low
TCGA-D3-A3CF	2.043835616	1	0.325160599	0.466628936	0.573409477	0.684018674	0.384640552	0.385962121	0.615848311	0.532376569	0.347978345	0.501820279	0.508913395	0.260768852	0.452925959	0.496317362	0.483057412	0.520144717	0.495832107	0.46965523	0.358938006	0.387156771	0.512549244	-2.483309813	low
TCGA-D3-A3ML	1.156164384	1	0.103797436	0.252036034	0.518392778	0.129274247	0.483915793	0.151536498	0.06423533	0.857057393	0.079197379	0.079856477	0.591718936	0.341645303	0.627431787	0.073043061	0.191374711	0.285305038	0.12467922	0.330178615	0.022017379	0.103188041	0.344106982	0.237799669	high
TCGA-D3-A3MR	8.632876712	0	0.355278818	0.377426221	0.695293978	0.838310264	0.498989616	0.373573859	0.486609583	0.839154514	0.375272685	0.463092064	0.58500989	0.195313279	0.494155287	0.499091905	0.369114463	0.472312163	0.536597745	0.415755112	0.450675015	0.425151939	0.506167314	-3.632936174	low
TCGA-D3-A3MU	3.312328767	0	0.090420049	0.288683748	0.781770877	0.34445528	0.776638486	0.651323369	0.665441927	0.763802348	0.161507657	0.314874917	0.608048989	0.543641146	0.290694037	0.143358549	0.311101375	0.278806716	0.352037484	0.246392731	0.142035743	0.250983181	0.309821914	-3.707290469	low
TCGA-D3-A3MV	3.775342466	0	0.239670194	0.13428305	0.220567575	0.568779791	0.109417182	0.136459915	0.160514012	0.172861907	0.151452148	0.289261055	0.252501369	0.088633954	0.260770693	0.115533654	0.214153861	0.11602846	0.239762487	0.194845494	0.194837452	0.279073022	0.243591895	-2.405026164	low
TCGA-D3-A51F	4.643835616	0	0.329113318	0.453294528	0.632164729	0.734280527	0.546469482	0.618544518	0.691544772	0.813884022	0.409152061	0.603566702	0.680888186	0.18849728	0.609447991	0.672149063	0.427187921	0.605147517	0.635407466	0.57150498	0.478908823	0.487317583	0.65591908	-3.254836247	low
TCGA-D3-A51H	4.695890411	0	0.311717558	0.466581155	0.68909729	0.893745113	0.439317147	0.565781734	0.642353652	0.829693497	0.401373032	0.557666562	0.618964575	0.242959064	0.621287248	0.672760384	0.519226218	0.578108262	0.711012116	0.626892886	0.568960728	0.469281981	0.701000986	-2.798052742	low
TCGA-D3-A51J	12.09315068	0	0.344971815	0.280813279	0.463330984	0.902451439	0.720411495	0.721793035	0.642758598	0.421941629	0.320292844	0.431693394	0.563550577	0.249692666	0.387424598	0.446860149	0.330824922	0.328698685	0.37020966	0.338191645	0.32675033	0.408900122	0.431274622	-5.463219731	low
TCGA-D3-A51N	1.884931507	0	0.345929	0.248703937	0.417308361	0.493054673	0.200564888	0.142636631	0.194023798	0.285570707	0.263676628	0.385062247	0.44768385	0.133607747	0.43917762	0.287322042	0.318265931	0.224908357	0.29495562	0.267225135	0.364255162	0.346592666	0.321624694	-2.74064226	low
TCGA-D3-A51R	5.317808219	0	0.081777645	0.033175786	0.09148903	0.310729178	0.047475927	0.042211374	0.05135889	0.209305772	0.085644806	0.107543068	0.075628303	0.028027998	0.062214454	0.06240793	0.076312485	0.036484843	0.085483153	0.052481088	0.021811777	0.09318805	0.08703643	-1.224234521	high
TCGA-D3-A51T	2.24109589	0	0.114337165	0.091100468	0.3452627	0.434470938	0.112629278	0.059214842	0.132689612	0.265610741	0.175310736	0.394728598	0.364699741	0.082611759	0.223607575	0.165382421	0.225321516	0.175909154	0.347734748	0.240103982	0.159528706	0.236725161	0.266242335	-1.508828085	high
TCGA-D3-A5GL	10.48219178	0	0.071435189	0.785702396	0.278859932	0.415565153	0.458771103	0.050724726	0.106036913	0.260955631	0.174567973	0.326585651	0.333990228	0.093355554	0.330292962	0.133496018	0.20824739	0.100832499	0.258933531	0.202008879	0.133803194	0.184720074	0.249019219	-2.915674055	low
TCGA-D3-A5GN	11.31232877	0	0.236138615	0.181703092	0.457633752	0.628269011	0.313599655	0.210791802	0.26540616	0.534647875	0.322857014	0.366508959	0.55895016	0.219759116	0.354221912	0.311296567	0.253861833	0.367457088	0.301395273	0.356833552	0.428719781	0.417163265	0.354766648	-3.404019319	low
TCGA-D3-A5GO	11.49315068	0	0.139750565	0.129288411	0.293546676	0.901711159	0.301468896	0.113603734	0.158385708	0.143272453	0.18109573	0.370785224	0.400366678	0.133537213	0.31610131	0.201724845	0.279119865	0.212477872	0.310489183	0.249757287	0.300347638	0.350343482	0.255826248	-2.912083829	low
TCGA-D3-A5GR	14.86027397	0	0.390620103	0.432621649	0.73445062	0.611750571	0.604648384	0.253424832	0.486957924	0.643629385	0.337268427	0.464722815	0.636421328	0.355741472	0.495861754	0.494837908	0.434715254	0.372217675	0.447619939	0.403900074	0.285048621	0.30415209	0.442178224	-3.006769012	low
TCGA-D3-A5GS	1.515068493	0	0.127326073	0.218388771	0.508133678	0.417482368	0.696669274	0.121114723	0.19073991	0.31171197	0.334895684	0.35510801	0.31760601	0.101437232	0.336005894	0.253013627	0.143046545	0.266024039	0.292369676	0.303289221	0.324259108	0.384543184	0.298716142	-2.156781974	high
TCGA-D3-A5GT	1.334246575	0	0.05418319	0.072032941	0.444510377	0.217254294	0.472416896	0.373608136	0.461747988	0.549134302	0.067738805	0.16961283	0.094654479	0.268941708	0.078632603	0.042308381	0.109441591	0.05553084	0.145062431	0.350170035	0.021068225	0.099938579	0.300431382	-1.984193149	high
TCGA-D3-A5GU	10.43287671	0	0.366840188	0.562997174	0.492747736	0.368288784	0.801046736	0.790541256	0.246812749	0.499360724	0.218336999	0.384984205	0.469186321	0.185727875	0.26574147	0.328708987	0.2545585	0.199561275	0.421116399	0.636218985	0.192794121	0.280157928	0.531914064	-2.138542278	high
TCGA-D3-A8GB	2.569863014	1	0.250223445	0.35008891	0.485869464	0.782240212	0.376127131	0.296470519	0.441695878	0.445637013	0.359281457	0.460517808	0.499867408	0.180828054	0.486920981	0.491268078	0.363328947	0.362945831	0.509437077	0.352935802	0.326274787	0.380663926	0.402634463	-2.549059015	low
TCGA-D3-A8GD	1.967123288	0	0.290847005	0.33310494	0.523058806	0.611118873	0.492907557	0.424808846	0.55856426	0.73299532	0.47354707	0.540428298	0.543236157	0.298042667	0.490906442	0.523216696	0.470417667	0.454371199	0.582231365	0.511384083	0.424953804	0.418913454	0.602789532	-3.483556138	low
TCGA-D3-A8GI	4.876712329	1	0.043173376	0.177156665	0.134622229	0.281878112	0.101400037	0.05953508	0.132967295	0.337204539	0.104231369	0.152326388	0.740817313	0.084761397	0.159211086	0.232692399	0.133026315	0.060406379	0.137608145	0.11266651	0.031497269	0.120312474	0.322879235	-2.785669897	low
TCGA-D3-A8GJ	20.11506849	0	0.382806643	0.619809595	0.726064218	0.599268391	0.656657814	0.435660818	0.473959736	0.759644976	0.405966265	0.486654557	0.559824189	0.305021568	0.494020019	0.542792073	0.354918781	0.412234354	0.436751628	0.521467553	0.404590978	0.444129461	0.574990788	-3.682266722	low
TCGA-D3-A8GK	14.18356164	0	0.126030896	0.13387226	0.089693146	0.312314852	0.078784323	0.044732067	0.754618926	0.075777459	0.115695011	0.153552173	0.105375468	0.042144895	0.155729196	0.112260439	0.129163666	0.534165532	0.174741837	0.073706338	0.509462117	0.507063068	0.135849568	-1.931581905	high
TCGA-D3-A8GL	7.42739726	1	0.553620375	0.885455921	0.879437837	0.193769435	0.850278169	0.899259996	0.055692639	0.111942364	0.142828824	0.125672323	0.050574731	0.748404862	0.351580354	0.096439024	0.250180098	0.103707813	0.181948347	0.25504841	0.017754568	0.0748332	0.277814905	-2.025450546	high
TCGA-D3-A8GM	8.928767123	1	0.175769574	0.367497528	0.406189311	0.459087456	0.500031699	0.196125034	0.462988882	0.358950589	0.327497885	0.413072951	0.38103102	0.149603481	0.406459879	0.37123605	0.383593459	0.331622151	0.409066986	0.337723619	0.259540213	0.350588684	0.394843346	-1.710956444	high
TCGA-D3-A8GP	12.70684932	0	0.052463128	0.398624164	0.354010094	0.145689871	0.753717426	0.643137262	0.442877455	0.172292871	0.375731699	0.246568797	0.399175074	0.323198455	0.350936507	0.507370569	0.227170602	0.122773012	0.269565158	0.340517979	0.042608068	0.118715573	0.38794039	-1.959749397	high
TCGA-D3-A8GQ	2.421917808	1	0.169553714	0.170200145	0.335654922	0.546085834	0.166733058	0.434356734	0.181653111	0.289933105	0.237053754	0.308523012	0.273010472	0.086623904	0.36185149	0.239412229	0.362978029	0.145487434	0.346008791	0.307954666	0.166726098	0.25795085	0.359882374	-0.969713839	high
TCGA-D3-A8GS	9.764383562	1	0.22700133	0.306103857	0.544860916	0.56984297	0.423277404	0.163662586	0.419196897	0.639955792	0.332480095	0.388480289	0.525404973	0.178554094	0.416340436	0.450117507	0.316711714	0.360114767	0.389389013	0.345487737	0.280992393	0.336527042	0.42273092	-2.365321196	low
TCGA-D9-A3Z1	1.282191781	1	0.354840255	0.418828188	0.681355536	0.698100629	0.499972379	0.427166046	0.574122207	0.58273038	0.379426765	0.464065716	0.548777471	0.226191192	0.64621497	0.539865005	0.416093937	0.564998155	0.528608171	0.5408454	0.465205619	0.465125193	0.566947453	-1.768047302	high
TCGA-D9-A3Z3	1.857534247	0	0.240557107	0.385458521	0.597289394	0.555728239	0.291106978	0.316498986	0.488860696	0.847891251	0.343439595	0.421568986	0.503286297	0.454142499	0.408731664	0.349011578	0.380331585	0.450701604	0.400583251	0.438068109	0.484634909	0.440076447	0.490577891	-3.920409776	low
TCGA-D9-A3Z4	1.421917808	1	0.234580798	0.200114495	0.520807324	0.428689254	0.194554595	0.123502289	0.219241137	0.413508635	0.254054225	0.340228865	0.365686736	0.140964438	0.288420848	0.234677126	0.218238317	0.278372584	0.294893254	0.323728453	0.274469021	0.345915301	0.314594086	-1.481210176	high
TCGA-D9-A4Z2	0.520547945	1	0.121221434	0.077793878	0.185920495	0.395757624	0.096635259	0.058417595	0.089618899	0.098843347	0.126688414	0.263022445	0.17446849	0.072260109	0.16613207	0.09118698	0.15367438	0.145683874	0.216271906	0.135604617	0.154491587	0.204005551	0.17459206	-1.559772001	high
TCGA-D9-A4Z3	1.383561644	0	0.136382829	0.09361639	0.578616813	0.303800389	0.130097997	0.776669588	0.342062494	0.533569212	0.198833297	0.355359558	0.34059501	0.089084065	0.505216106	0.210627264	0.197468921	0.322015089	0.283338197	0.135654378	0.188457528	0.229961645	0.147075085	-1.509414393	high
TCGA-D9-A4Z5	0.597260274	0	0.028941721	0.093578561	0.148616779	0.20794834	0.124790756	0.06866287	0.045928766	0.555172722	0.079144428	0.151431327	0.11008765	0.038706984	0.121389964	0.055785175	0.208909575	0.027853754	0.08526404	0.098701002	0.020683642	0.102787299	0.156963507	-1.087685486	high
TCGA-D9-A4Z6	1.536986301	1	0.056096619	0.036440665	0.229781834	0.345716385	0.081493573	0.048812846	0.116241985	0.08257403	0.142677087	0.279049089	0.229390684	0.076185177	0.216918692	0.190286988	0.181451974	0.051780513	0.222055721	0.168076219	0.086600844	0.193853527	0.210032945	-0.821737665	high
TCGA-D9-A6E9	0.824657534	0	0.356641642	0.669300512	0.892180934	0.650626236	0.748648328	0.506428114	0.487464415	0.568385181	0.389951611	0.477974933	0.540585625	0.318646243	0.507003491	0.479166857	0.389820868	0.506534967	0.505910771	0.453037394	0.481182268	0.447137312	0.50552406	-3.212402212	low
TCGA-D9-A6EA	2.098630137	0	0.633246814	0.085825501	0.465332391	0.713910068	0.596686507	0.361852482	0.104248781	0.478737588	0.112100461	0.220167919	0.193574587	0.497183353	0.384047622	0.080854581	0.272589446	0.304502455	0.190235113	0.586008748	0.10689799	0.17235463	0.530668392	-2.117794215	high
TCGA-D9-A6EC	5.520547945	0	0.028690147	0.069117785	0.900245777	0.200479538	0.459549081	0.096327485	0.051649752	0.831587851	0.073867082	0.198461811	0.255752809	0.602830465	0.089372261	0.053671284	0.112601525	0.05832869	0.124593664	0.096332234	0.03238118	0.106036846	0.13523947	-2.149068124	high
TCGA-D9-A6EG	1.912328767	1	0.032713045	0.124221681	0.067814976	0.156689983	0.253727932	0.044130965	0.059135057	0.285571695	0.085388718	0.125174996	0.050403422	0.106022236	0.063004384	0.073134483	0.064529092	0.089466383	0.09321413	0.072512232	0.05255677	0.103201675	0.085222931	-1.25179372	high
TCGA-DA-A1HV	4.115068493	0	0.228655195	0.255953254	0.476857905	0.509470838	0.303247337	0.161706007	0.31206689	0.510698101	0.316074977	0.364923316	0.555400875	0.219723233	0.343792884	0.290545704	0.28212625	0.310601457	0.314078754	0.337906694	0.26406427	0.358385456	0.386056682	-2.681460555	low
TCGA-DA-A1HW	1.17260274	0	0.265346261	0.286137244	0.484105551	0.582920684	0.28352138	0.207335719	0.349966688	0.429680767	0.35352383	0.40962438	0.446944588	0.204065694	0.376070048	0.390363876	0.411040482	0.381180355	0.402158238	0.435377942	0.423900299	0.432136376	0.474452591	-2.066737303	high
TCGA-DA-A1HY	9.808219178	0	0.079986189	0.1088584	0.349696517	0.424839712	0.095429293	0.082000149	0.123748834	0.344510007	0.105970007	0.303912747	0.653932035	0.087084912	0.240979163	0.149633316	0.175291314	0.077317846	0.202775122	0.203343783	0.095583268	0.222090981	0.252756756	-2.280201275	high
TCGA-DA-A1I0	1.62739726	0	0.244856959	0.227889276	0.451285466	0.646731554	0.423549398	0.363725403	0.386916603	0.344697226	0.264989985	0.481114188	0.512579213	0.247948779	0.460120355	0.372776043	0.307398078	0.288585816	0.515955648	0.354161507	0.312801276	0.372070233	0.38193731	-2.700956225	low
TCGA-DA-A1I1	16.27671233	0	0.265823137	0.489309054	0.750422194	0.502352597	0.776041838	0.683561032	0.407911572	0.460532913	0.339440871	0.420510819	0.500963928	0.19170519	0.410592915	0.364952025	0.429641888	0.392272628	0.349961893	0.33670176	0.400440567	0.453470953	0.374317235	-2.722182394	low
TCGA-DA-A1I2	13.93972603	0	0.090181858	0.150294063	0.443686449	0.598341278	0.788521276	0.074054137	0.117924409	0.460456584	0.208299981	0.255183439	0.475234002	0.116728823	0.233010952	0.228356889	0.257320903	0.091376864	0.228078043	0.328676019	0.093955845	0.175945347	0.326918964	-2.144134863	high
TCGA-DA-A1I4	2.994520548	1	0.063383156	0.119824898	0.342806984	0.533603872	0.183109344	0.105942538	0.351054333	0.423793691	0.224989604	0.453311436	0.316374453	0.145732748	0.473445594	0.24756987	0.281796188	0.268916988	0.431589209	0.394200055	0.188352081	0.290712688	0.420066711	-1.175293144	high
TCGA-DA-A1I5	8.98630137	0	0.207779658	0.237347203	0.464010311	0.57429407	0.645022847	0.202889069	0.337107126	0.381934352	0.313416607	0.411504046	0.407168652	0.179514706	0.391741629	0.433135877	0.40550402	0.329824631	0.429638482	0.398492152	0.385356193	0.427584855	0.423962955	-1.568268844	high
TCGA-DA-A1I7	5.139726027	0	0.361881946	0.215592429	0.34356011	0.802787221	0.208535042	0.142778241	0.152415927	0.71637309	0.293466018	0.33109365	0.58864257	0.477237672	0.732610153	0.368761913	0.282538329	0.245853329	0.283639455	0.269495551	0.221143297	0.302474519	0.305785023	-3.533060051	low
TCGA-DA-A1I8	3.747945205	0	0.472526551	0.054074261	0.226944129	0.751581491	0.056801318	0.652920282	0.193271909	0.292589753	0.125533736	0.314318367	0.596310057	0.067474483	0.306229729	0.179586104	0.307641439	0.310301806	0.260479634	0.255775856	0.490201253	0.488972619	0.288123318	-3.907900058	low
TCGA-DA-A1IA	5.493150685	1	0.079395382	0.203315006	0.24230799	0.174756845	0.476623488	0.54915377	0.43307039	0.170544037	0.116086729	0.227463845	0.142258778	0.13841476	0.137801228	0.144524826	0.197012708	0.105308263	0.184184138	0.260534806	0.044407859	0.119518386	0.278187344	-1.852514785	high
TCGA-DA-A1IB	1.243835616	0	0.39052014	0.573580835	0.751428896	0.81916411	0.601529434	0.720656762	0.781809371	0.809121905	0.450226399	0.608608355	0.666152934	0.319594472	0.697878388	0.791372993	0.518792791	0.597572204	0.682854109	0.651271549	0.50917514	0.522024278	0.675848996	-2.810164157	low
TCGA-DA-A1IC	5.673972603	1	0.164496761	0.698868303	0.318935756	0.35895611	0.277826666	0.086692944	0.202757894	0.291190001	0.248696479	0.316999336	0.340926042	0.142603985	0.534329608	0.21571093	0.292551322	0.215312146	0.275245349	0.278827816	0.241541449	0.324949192	0.298556137	-1.473534881	high
TCGA-DA-A3F2	1.8	0	0.313350299	0.458724096	0.628127993	0.772234163	0.478752702	0.431045402	0.605646213	0.759051107	0.389513301	0.570437558	0.593483119	0.238830892	0.629927111	0.679417042	0.488890351	0.494576907	0.589674776	0.538065168	0.510372667	0.495872553	0.600609664	-2.851703846	low
TCGA-DA-A3F3	0.873972603	1	0.09413498	0.078890162	0.239592815	0.201314301	0.078071576	0.055329232	0.067013783	0.254178389	0.124701038	0.150084678	0.122874746	0.056711314	0.132679493	0.073176558	0.137684511	0.075525788	0.140617488	0.092307546	0.022363322	0.168492178	0.132907194	-0.193146456	high
TCGA-DA-A3F5	17.66027397	0	0.550904145	0.197033575	0.573930342	0.788720758	0.640659371	0.276737351	0.238447597	0.86885215	0.182980456	0.422924794	0.639990219	0.267159817	0.720999791	0.620297387	0.303576444	0.36733693	0.395142804	0.444511504	0.311780208	0.305372566	0.46289061	-2.513440111	low
TCGA-DA-A3F8	1.347945205	0	0.320735439	0.423194256	0.53820703	0.632448955	0.700984929	0.499352261	0.733720671	0.654356263	0.447763702	0.48085924	0.591370305	0.238015435	0.536293433	0.50887237	0.445418077	0.474644905	0.478416229	0.442270158	0.470814459	0.484976492	0.49919754	-4.085933801	low
TCGA-DA-A95X	4.145205479	0	0.719312525	0.519825644	0.897850633	0.900237903	0.445191574	0.382967827	0.206821707	0.6297606	0.208720932	0.250217366	0.41315746	0.425477732	0.26631055	0.173764144	0.257977067	0.51219751	0.229687643	0.18907388	0.418645767	0.544009228	0.227900695	-3.767967462	low
TCGA-DA-A95Y	1.178082192	1	0.075868623	0.205631159	0.412084421	0.269925107	0.219918544	0.090100016	0.160896051	0.221958882	0.143974399	0.25869757	0.294219791	0.282433808	0.181176396	0.157715997	0.239717373	0.12179694	0.204548422	0.174957178	0.083531411	0.175304878	0.218578791	-1.207811644	high
TCGA-DA-A960	2.202739726	0	0.02559889	0.672733313	0.256923924	0.232378836	0.188550679	0.245594263	0.437344483	0.781504027	0.079782138	0.136753098	0.065181165	0.079640041	0.110944712	0.230272839	0.203414518	0.041918491	0.141301063	0.081513335	0.062556274	0.142042365	0.117032746	-2.122381751	high
TCGA-EB-A1NK	1.679452055	0	0.146795987	0.438270336	0.367732552	0.490000025	0.253029273	0.111052204	0.222023292	0.523653895	0.22250124	0.335539026	0.349175826	0.118867325	0.309560423	0.253141182	0.340846927	0.250835106	0.33476475	0.293777266	0.234641073	0.310461804	0.301194057	-1.412167387	high
TCGA-EB-A24D	1.767123288	0	0.168737535	0.272942635	0.800708828	0.849018632	0.833078013	0.202330006	0.168158285	0.589689352	0.226958088	0.317702961	0.344774086	0.098331834	0.300395792	0.190162905	0.302773485	0.243378005	0.247088432	0.355419653	0.262811908	0.285639785	0.35787599	-2.647967659	low
TCGA-EB-A299	1.035616438	0	0.179083215	0.170181698	0.329984823	0.433180845	0.20859262	0.140727128	0.148732106	0.368908729	0.23510197	0.304999151	0.348961411	0.136156469	0.3552738	0.251710046	0.218093591	0.163758898	0.252720376	0.230600933	0.189067279	0.322238221	0.310513724	-1.720905143	high
TCGA-EB-A3HV	0.106849315	0	0.240748505	0.248060842	0.333517872	0.489149686	0.673951263	0.148975979	0.141664758	0.534685177	0.116650485	0.220398157	0.351321135	0.302979634	0.132429912	0.220457868	0.305438805	0.380721498	0.219261287	0.389646921	0.179053037	0.305755878	0.362809291	-0.908589795	high
TCGA-EB-A3XC	1.780821918	0	0.1731561	0.155579958	0.383621881	0.471164971	0.217430894	0.086397503	0.214054916	0.225229284	0.233427959	0.351670957	0.303601285	0.198635939	0.265979214	0.24824313	0.339565834	0.339781527	0.333792743	0.269861332	0.297408715	0.346375252	0.282301842	-0.901898307	high
TCGA-EB-A3XE	0.493150685	0	0.261418901	0.307168648	0.587308892	0.59285779	0.285085266	0.408760583	0.25789594	0.502126351	0.439202638	0.383541011	0.564764326	0.180667887	0.418965315	0.34598872	0.353470695	0.247690467	0.336169528	0.339869305	0.321799085	0.2880931	0.317141103	-3.317016459	low
TCGA-EB-A3XF	0.761643836	0	0.186229711	0.260919112	0.345812034	0.456645384	0.212223534	0.106617579	0.231709575	0.328107108	0.194369973	0.290402373	0.293317515	0.202148159	0.303778071	0.268856477	0.231236349	0.156114911	0.258343961	0.269387555	0.263349028	0.327107311	0.27367642	-1.834100883	high
TCGA-EB-A3Y6	0.345205479	0	0.215667156	0.119656313	0.475095793	0.506033614	0.51253771	0.133876072	0.235008825	0.688335788	0.28756159	0.373724227	0.430192515	0.15289332	0.323741652	0.274038	0.262889638	0.207158506	0.3608332	0.321090039	0.297746085	0.343679286	0.340857674	-2.773976708	low
TCGA-EB-A3Y7	0.893150685	1	0.152777141	0.44181539	0.457953209	0.546738444	0.157915898	0.13725593	0.264662354	0.274691474	0.274458478	0.455486349	0.317807271	0.133253152	0.404015205	0.345624563	0.332921981	0.260750622	0.42167983	0.382903071	0.326243874	0.421318805	0.38488794	-1.10158265	high
TCGA-EB-A41B	0.797260274	0	0.568180362	0.154990109	0.368907614	0.453624623	0.323325061	0.134059933	0.134013931	0.363118921	0.233040535	0.300533659	0.339739958	0.088173567	0.377511993	0.178578983	0.288657558	0.238224306	0.284504038	0.229681931	0.174026011	0.290266838	0.237797293	-1.571578671	high
TCGA-EB-A42Y	1.205479452	0	0.082498284	0.14926696	0.299128887	0.351176709	0.890359136	0.06524358	0.19500492	0.482934548	0.135143277	0.305035597	0.217105828	0.07919212	0.168647975	0.206720612	0.220887265	0.214983755	0.213991296	0.240640037	0.05181583	0.115942181	0.237243633	-1.687910109	high
TCGA-EB-A42Z	1.208219178	0	0.49985845	0.262284149	0.32486284	0.671045953	0.220666626	0.096686335	0.216700974	0.286730726	0.188197084	0.210021581	0.289120687	0.116688391	0.479977417	0.141511406	0.264122074	0.599801759	0.216313198	0.419125234	0.61492226	0.568856279	0.357840827	-1.206455493	high
TCGA-EB-A431	1.556164384	0	0.081277168	0.072811435	0.306988863	0.470560451	0.119202023	0.060298315	0.348762048	0.74006318	0.165582522	0.391041166	0.332545401	0.099291475	0.236828546	0.169107682	0.253983051	0.160660156	0.333431272	0.320625783	0.171716717	0.233093006	0.328164818	-2.535515768	low
TCGA-EB-A44N	0.561643836	1	0.330604376	0.274064996	0.5146836	0.608175369	0.340839606	0.23237398	0.366838212	0.600653601	0.345858351	0.39432557	0.479146934	0.169496937	0.399519958	0.414027635	0.356605616	0.326805345	0.376172206	0.357930331	0.404887476	0.417977828	0.425651259	-2.983635504	low
TCGA-EB-A44O	0.221917808	0	0.138347624	0.081261478	0.269381386	0.400779995	0.133432693	0.101718145	0.0689859	0.211742999	0.180262408	0.23663726	0.317539395	0.062179788	0.185540556	0.141378133	0.187886632	0.167905794	0.180424971	0.159731004	0.208679756	0.308477754	0.245350802	-1.601180238	high
TCGA-EB-A44P	1.030136986	0	0.14269895	0.178091919	0.338331115	0.380838193	0.120176821	0.1762393	0.157778606	0.576387165	0.255117838	0.315610996	0.343529156	0.096774035	0.276798426	0.164407688	0.225206416	0.145847868	0.265283119	0.287699715	0.155722555	0.207033302	0.311757971	-2.254120882	high
TCGA-EB-A4IQ	1.134246575	0	0.150898071	0.253610518	0.546975033	0.515056001	0.193808329	0.05028545	0.22721189	0.205480424	0.170975921	0.278852478	0.297346108	0.089909143	0.232405756	0.333911585	0.205957186	0.127533475	0.287256011	0.242691918	0.181425468	0.261285854	0.301012113	-0.854619001	high
TCGA-EB-A4OY	1.624657534	0	0.177193603	0.287719579	0.381221896	0.434726752	0.367320825	0.119783277	0.168907382	0.297818288	0.295586942	0.394518918	0.34391346	0.152041526	0.321352826	0.217874367	0.24879648	0.215257329	0.317244565	0.318041762	0.27231924	0.312302371	0.346454298	-2.53576065	low
TCGA-EB-A4OZ	1.698630137	0	0.273128228	0.329649387	0.55078075	0.671958891	0.327689229	0.310518739	0.418350276	0.553409113	0.351460189	0.452350791	0.519902868	0.157606135	0.448491191	0.467986496	0.390124478	0.393067983	0.439846329	0.381848883	0.426636816	0.422933455	0.461305396	-2.843380558	low
TCGA-EB-A4P0	0.893150685	1	0.033924909	0.062669042	0.238555229	0.339480604	0.154576825	0.050566474	0.084953442	0.200492661	0.215308908	0.225222621	0.261995582	0.067379826	0.169684017	0.19251695	0.145266937	0.077219638	0.178990453	0.1600348	0.121909527	0.204809264	0.175627214	-1.260916223	high
TCGA-EB-A551	1.616438356	0	0.483529242	0.489900269	0.759114928	0.694833993	0.682544573	0.649091064	0.51501815	0.646725172	0.457258731	0.422698936	0.549334332	0.26262137	0.690543996	0.496551637	0.578625264	0.456810666	0.492553404	0.525287037	0.468100706	0.450553815	0.504759935	-2.180197609	high
TCGA-EB-A553	0.619178082	0	0.141176193	0.538543987	0.383048282	0.508676851	0.531067281	0.126399713	0.302223998	0.273264506	0.269625059	0.440381474	0.361439739	0.346058574	0.352812232	0.208995464	0.230731902	0.244627548	0.470098307	0.255765599	0.33960296	0.385342284	0.284635319	-3.535910767	low
TCGA-EB-A57M	1.093150685	0	0.119848453	0.150392478	0.407714675	0.739409318	0.232303425	0.048783042	0.125145283	0.234384004	0.166492482	0.305479528	0.326239562	0.059262618	0.255695598	0.187899009	0.215245628	0.213697252	0.27273411	0.166466497	0.316582074	0.333763024	0.21168022	-2.323710054	low
TCGA-EB-A5KH	1.695890411	1	0.107652398	0.441183723	0.463016112	0.230540464	0.311958097	0.079670568	0.087890459	0.12328621	0.087995384	0.217984601	0.708255127	0.145430568	0.353309048	0.092687118	0.269234932	0.052255332	0.152623329	0.13669098	0.051783845	0.1764846	0.169696972	-1.192395875	high
TCGA-EB-A5SH	4.501369863	0	0.084848488	0.380317038	0.69843675	0.364524291	0.815439158	0.886267182	0.550362894	0.566084314	0.42678324	0.269108874	0.581325909	0.154762987	0.289425661	0.300371707	0.443607831	0.228111575	0.225830361	0.600685379	0.27108086	0.333876335	0.568152532	-2.590460401	low
TCGA-EB-A5UM	1.134246575	0	0.498121119	0.494099911	0.390300918	0.478465812	0.21849638	0.775560644	0.369745115	0.683840858	0.272392967	0.312879284	0.693659137	0.371382618	0.492510525	0.698262062	0.269629516	0.490561554	0.380908532	0.670814753	0.372217486	0.351568168	0.519713171	-1.39717976	high
TCGA-EB-A5VU	0.879452055	1	0.279789507	0.074303361	0.242477453	0.368571915	0.208921238	0.046916943	0.109614418	0.322385121	0.092444234	0.218996239	0.214355895	0.065056692	0.155971977	0.265129552	0.197847616	0.087145073	0.185231665	0.132472325	0.117547617	0.160352845	0.136400261	-1.189200077	high
TCGA-EB-A5VV	0.58630137	0	0.413592943	0.547145501	0.814747632	0.868827095	0.560322223	0.564268478	0.703229002	0.79286697	0.429792082	0.606263772	0.635917302	0.286939271	0.678935551	0.68106938	0.524630296	0.583679367	0.731702629	0.650197731	0.530479422	0.437937072	0.804196908	-3.475597973	low
TCGA-EB-A6QY	1.046575342	0	0.18698729	0.137687281	0.381889343	0.529747439	0.270826379	0.129682855	0.161787875	0.36348806	0.286603664	0.349257792	0.370011158	0.152725677	0.291975627	0.209729743	0.286953652	0.317986588	0.298887244	0.306134404	0.353185706	0.345331751	0.306516326	-2.217777336	high
TCGA-EB-A6QZ	0.964383562	1	0.05162682	0.071421642	0.772800966	0.347797963	0.312087651	0.071817027	0.153170611	0.456588131	0.112196888	0.19932169	0.178031547	0.083706957	0.15389075	0.124749755	0.263287039	0.103250931	0.131282684	0.110558312	0.093267773	0.130748044	0.169657746	-0.409942832	high
TCGA-EB-A6R0	1.279452055	0	0.241583654	0.174023113	0.460568698	0.473688283	0.2556609	0.179625311	0.211535485	0.197326482	0.368305117	0.432135793	0.381563674	0.139247283	0.341133111	0.290557489	0.355171267	0.250662829	0.405060665	0.296760101	0.345022326	0.345432589	0.313769889	-2.027128873	high
TCGA-EB-A82B	1.068493151	0	0.489621292	0.246768308	0.471889085	0.621965669	0.220589134	0.267683211	0.276533084	0.542694758	0.245379665	0.430245741	0.356406051	0.152617857	0.413534578	0.336933718	0.398283027	0.178465257	0.416850437	0.333033786	0.307658874	0.337180682	0.353167115	-2.63442538	low
TCGA-EB-A85I	0.991780822	0	0.220652001	0.371021455	0.6984948	0.557093028	0.350279119	0.228601995	0.324927403	0.52818102	0.378291406	0.418431279	0.485499214	0.179930223	0.388199769	0.413171034	0.378047114	0.399500685	0.388158709	0.643302398	0.462687804	0.413318951	0.711074392	-2.003470364	high
TCGA-EB-A85J	0.98630137	0	0.241508821	0.339236307	0.510368431	0.612919758	0.308832906	0.297381806	0.396043301	0.538701967	0.354700556	0.442250381	0.538661132	0.170997705	0.482581161	0.468808557	0.347130852	0.378189711	0.444186859	0.372175886	0.450386982	0.429749653	0.433015112	-2.826846935	low
TCGA-EB-A97M	1.134246575	0	0.133294498	0.511112661	0.325280869	0.313029445	0.516267269	0.479161768	0.60162056	0.600230803	0.248528863	0.265846816	0.291292619	0.092968807	0.247298879	0.294363234	0.182969103	0.155088569	0.210213419	0.277260097	0.232808863	0.302006956	0.389785369	-4.161433594	low
TCGA-EE-A17X	2.484931507	1	0.0402681	0.124032375	0.146031085	0.249281988	0.083774586	0.067915132	0.096616938	0.11708353	0.132795561	0.26432043	0.147201795	0.110689295	0.205342059	0.195567856	0.211815308	0.252991716	0.200454393	0.140021283	0.080447469	0.190539533	0.166311389	0.186842722	high
TCGA-EE-A17Y	2.268493151	1	0.109171575	0.075598798	0.233514399	0.470365615	0.092040194	0.05647445	0.217992679	0.396312078	0.10405059	0.310637101	0.111823498	0.097014411	0.459033362	0.136069798	0.270908929	0.09627757	0.282664709	0.274219251	0.082987433	0.155732308	0.284602042	-0.623348357	high
TCGA-EE-A17Z	0.720547945	1	0.041461624	0.108488746	0.114039397	0.148208047	0.055502738	0.049793647	0.059741306	0.066429769	0.093902089	0.128523708	0.089875051	0.061893622	0.081402236	0.108685647	0.122318462	0.045520578	0.125759172	0.059934739	0.032963264	0.120678756	0.072037392	-0.114333237	high
TCGA-EE-A180	7.915068493	1	0.04105873	0.113998516	0.171504226	0.229118594	0.718122194	0.091568853	0.301495014	0.068553926	0.138991122	0.173644449	0.10906333	0.086615803	0.097593858	0.100430023	0.10319468	0.047907722	0.113537207	0.06568142	0.068213402	0.100702677	0.116365823	-2.663702563	low
TCGA-EE-A181	2.810958904	1	0.272202721	0.322578092	0.62506164	0.596089945	0.615483952	0.214549212	0.290900922	0.509491142	0.39554704	0.403186101	0.519736493	0.183102427	0.428265322	0.410060942	0.312945534	0.317981286	0.417605123	0.381177051	0.363624649	0.38182853	0.410102025	-2.630193263	low
TCGA-EE-A182	1.224657534	1	0.139700777	0.266531651	0.370520075	0.441323454	0.268042345	0.137291763	0.510836343	0.506996521	0.331294356	0.394314626	0.365844955	0.135401557	0.416455879	0.224124998	0.224082046	0.302596673	0.339219526	0.538241405	0.22194771	0.356010171	0.485811625	-1.883933212	high
TCGA-EE-A184	5.679452055	1	0.108709751	0.120544756	0.336442623	0.415280093	0.141847042	0.08280077	0.158850035	0.309317048	0.214258525	0.360189342	0.328464602	0.102922748	0.295421441	0.21153273	0.246617718	0.181444477	0.309072795	0.232012953	0.217972347	0.26164888	0.253834546	-1.560146706	high
TCGA-EE-A185	0.41369863	1	0.029331684	0.070373752	0.085342164	0.215527278	0.119949715	0.050587161	0.073781848	0.081044893	0.090820609	0.181112285	0.033736759	0.039897687	0.123741007	0.091940748	0.103549344	0.072507451	0.172798178	0.098454205	0.022487958	0.066157551	0.137268292	-0.602585642	high
TCGA-EE-A20B	11.15068493	0	0.560403438	0.18083625	0.417424189	0.933543974	0.213859609	0.181985086	0.303249483	0.361393948	0.290385499	0.393204633	0.416739481	0.142305054	0.315593779	0.27536305	0.298241578	0.528345757	0.279807803	0.288479564	0.554722522	0.558563132	0.338563246	-4.250353369	low
TCGA-EE-A20F	7.630136986	0	0.183500267	0.236748592	0.501493084	0.457020672	0.346362252	0.183615787	0.294140121	0.457268178	0.38790182	0.480214181	0.399031564	0.158930261	0.483838487	0.280591973	0.249714774	0.238547616	0.429014643	0.312240393	0.285839507	0.379703491	0.361233989	-2.659531986	low
TCGA-EE-A20H	14.02191781	1	0.554309966	0.074261372	0.198228095	0.607125514	0.09621296	0.160924872	0.139075108	0.150532827	0.20521725	0.210548958	0.377153602	0.125084576	0.112344715	0.348887859	0.237539165	0.135634521	0.234789318	0.133030333	0.033621137	0.125301902	0.145191474	-2.082617963	high
TCGA-EE-A29A	5.279452055	1	0.728860469	0.231590275	0.820791392	0.884802645	0.66414177	0.812661594	0.090166232	0.896302239	0.432828336	0.263203123	0.809770841	0.76167135	0.689839398	0.494332021	0.541708625	0.60779952	0.358637751	0.713945079	0.06218107	0.166251485	0.720003734	-1.45075956	high
TCGA-EE-A29B	7.090410959	1	0.078523631	0.256205512	0.542096657	0.239493765	0.647779494	0.091133061	0.09456752	0.544849191	0.121223778	0.818867089	0.936695861	0.52438555	0.267701251	0.50313155	0.153672661	0.421559277	0.843534077	0.4295656	0.017285809	0.06659655	0.497824302	-2.380743241	low
TCGA-EE-A29C	6.580821918	1	0.157758844	0.177167723	0.318164799	0.471165485	0.231306029	0.204778309	0.220853843	0.350383646	0.246693771	0.376792578	0.365069343	0.124870462	0.307041128	0.276112123	0.251261016	0.199196878	0.364143283	0.291224256	0.231582234	0.323512652	0.329725006	-1.867180262	high
TCGA-EE-A29D	1.164383562	1	0.052172571	0.309835	0.23110853	0.135888042	0.159531493	0.25493312	0.751264086	0.211989434	0.108866552	0.185358342	0.104261615	0.192942474	0.278631455	0.10940522	0.149779356	0.064875928	0.133158206	0.353244472	0.025708664	0.099210568	0.372867324	-2.05784463	high
TCGA-EE-A29E	5.315068493	0	0.048616932	0.069410305	0.19427479	0.290390004	0.049386962	0.044869505	0.09536819	0.15117124	0.097838202	0.312286837	0.153581358	0.060468652	0.277608951	0.116032782	0.140879255	0.07666437	0.23959441	0.187457616	0.092501187	0.239887694	0.201955212	-0.436570725	high
TCGA-EE-A29G	6.005479452	1	0.585030929	0.284580946	0.570267801	0.590676237	0.4810043	0.483497074	0.200167523	0.603607766	0.263514669	0.349243014	0.460244095	0.164462283	0.425188297	0.247906172	0.354433172	0.397952238	0.316339459	0.412756977	0.504910652	0.516577453	0.41105142	-2.872621436	low
TCGA-EE-A29H	5.38630137	0	0.322545893	0.336316184	0.480971968	0.482127314	0.513420215	0.613189944	0.247123325	0.371585282	0.272843067	0.34415363	0.384235934	0.247880463	0.323303134	0.358927185	0.358054228	0.220540266	0.363591802	0.35882204	0.143572687	0.255498622	0.410301753	-1.860328587	high
TCGA-EE-A29L	0.216438356	1	0.079421191	0.233119223	0.466586312	0.188241259	0.90567725	0.372100071	0.064835837	0.30746797	0.490481111	0.175194079	0.122915359	0.324195169	0.297008028	0.708307609	0.267627033	0.12951083	0.130115579	0.126695859	0.051285392	0.219413133	0.165364094	0.096597698	high
TCGA-EE-A29M	4.736986301	0	0.290444411	0.414267562	0.468972917	0.640706099	0.327671825	0.315657711	0.451871082	0.354488594	0.371716257	0.435841185	0.554930364	0.199408607	0.441209231	0.371596079	0.363512196	0.458015861	0.457731105	0.406008931	0.414212065	0.48017834	0.404299152	-2.396231588	low
TCGA-EE-A29P	4.701369863	0	0.514927277	0.842474659	0.824529042	0.935595782	0.812255188	0.885553362	0.749230849	0.58218706	0.452887894	0.495954243	0.815155941	0.3299666	0.73338294	0.74388355	0.512087431	0.612513705	0.554647452	0.548317597	0.534488936	0.576842597	0.581923792	-3.748524843	low
TCGA-EE-A29Q	5.561643836	1	0.225999518	0.122989707	0.508518818	0.351860364	0.117838266	0.119066171	0.107292835	0.618191949	0.161395716	0.315044997	0.250167081	0.129641734	0.201196179	0.195470233	0.211058212	0.175215284	0.250909547	0.148649379	0.102663886	0.191208551	0.208972904	-1.468854341	high
TCGA-EE-A29R	1.205479452	0	0.332396369	0.131372677	0.234925291	0.212342254	0.09750025	0.078656049	0.083442959	0.343170016	0.130497541	0.166339712	0.422230528	0.061976093	0.127121526	0.101309128	0.165266939	0.070585946	0.112984506	0.081566276	0.041948915	0.117553109	0.140672271	-2.190001136	high
TCGA-EE-A29S	5.106849315	1	0.386398729	0.795763096	0.803994875	0.866080911	0.585777378	0.794436898	0.323095801	0.789923968	0.311995206	0.374871747	0.733708161	0.422230316	0.542406771	0.259350967	0.434166915	0.841590107	0.354724036	0.451794288	0.774180826	0.697164668	0.467316978	-4.248317734	low
TCGA-EE-A29V	2.156164384	1	0.072965002	0.113337973	0.27159291	0.453305953	0.171171242	0.102078868	0.231855948	0.255103648	0.150399527	0.350598787	0.215049945	0.098692032	0.312793167	0.2142291	0.166780927	0.155927511	0.358933458	0.371187751	0.142158578	0.253621875	0.40575363	-0.833900491	high
TCGA-EE-A29X	1.493150685	1	0.396522931	0.196026669	0.435458064	0.511953012	0.427775427	0.119652162	0.322095608	0.676030021	0.262696699	0.399556763	0.66270158	0.232354354	0.287920409	0.426721557	0.435854299	0.257736518	0.426878832	0.396319355	0.312809089	0.339136599	0.415840015	-2.586124062	low
TCGA-EE-A2A0	3.901369863	1	0.294035447	0.543382135	0.486868135	0.559300216	0.386870402	0.504591211	0.454840725	0.670362	0.32371267	0.46063496	0.477757176	0.216481919	0.510343332	0.445012736	0.385905014	0.351451785	0.413564033	0.438586574	0.338665783	0.371382784	0.537591401	-3.381592345	low
TCGA-EE-A2A1	8.575342466	0	0.210467738	0.260990338	0.503411207	0.686751002	0.333754453	0.304310739	0.445043424	0.350242533	0.415789118	0.426398896	0.558140475	0.175529018	0.482137881	0.485110585	0.449391852	0.343098328	0.46058757	0.445772641	0.388945477	0.416535593	0.441395566	-1.810961136	high
TCGA-EE-A2A2	3.068493151	0	0.139669764	0.839640861	0.488431631	0.480161415	0.170493787	0.295570213	0.613287215	0.195514431	0.21038967	0.315759123	0.371965285	0.279542698	0.344214123	0.231249586	0.233511823	0.229821498	0.261664217	0.214069666	0.271658266	0.295065472	0.272174068	-3.931627373	low
TCGA-EE-A2A5	3.273972603	1	0.180742906	0.145572625	0.42095537	0.296355052	0.200900793	0.080667703	0.08480824	0.392129087	0.116304448	0.232199204	0.18943094	0.081767423	0.202207474	0.107835708	0.233563618	0.072054543	0.196561928	0.116160168	0.074048314	0.186871958	0.145968714	-0.696361345	high
TCGA-EE-A2A6	7.178082192	0	0.20322182	0.244507714	0.459173194	0.526163451	0.75862127	0.594353728	0.590312212	0.566857856	0.263394206	0.491142418	0.468974355	0.206547415	0.437613335	0.464578091	0.45670664	0.342779794	0.579460415	0.409119711	0.403501157	0.409974905	0.456128155	-2.527740385	low
TCGA-EE-A2GB	4.939726027	0	0.093526523	0.105115633	0.269960431	0.334303959	0.127526933	0.078805838	0.107385262	0.271528387	0.183121187	0.235394744	0.280174426	0.057108047	0.181661997	0.159163723	0.185335111	0.096546851	0.220701194	0.161973977	0.17595442	0.244245065	0.217668252	-1.432801357	high
TCGA-EE-A2GC	5.619178082	0	0.528602565	0.38728475	0.648220539	0.504130466	0.485807667	0.199315971	0.284991935	0.569970748	0.264400118	0.380463684	0.521019374	0.307931932	0.397245717	0.318080797	0.225654458	0.319077925	0.388204342	0.27944999	0.346427675	0.374469061	0.333744275	-3.520725504	low
TCGA-EE-A2GD	28.34520548	1	0.455090997	0.314192779	0.611189481	0.652477521	0.4177592	0.602449809	0.659535798	0.738688211	0.565633734	0.673994494	0.595805677	0.395911434	0.720365575	0.482837842	0.568971929	0.503689466	0.708151439	0.69197256	0.429304055	0.454600077	0.717014094	-3.507530659	low
TCGA-EE-A2GE	13.41917808	0	0.293636712	0.373644731	0.506177374	0.832133767	0.472615697	0.448166664	0.53487117	0.525203568	0.421034451	0.471903978	0.563495397	0.19627246	0.510373674	0.487106304	0.349490552	0.444839552	0.496362639	0.414206361	0.406684128	0.446220468	0.473833016	-3.72094735	low
TCGA-EE-A2GH	17.3369863	0	0.293217597	0.452685237	0.606578848	0.62664042	0.442724469	0.499482005	0.606246125	0.601022828	0.422419679	0.518140858	0.555863537	0.226331235	0.628854189	0.616726602	0.434327647	0.434402101	0.527004536	0.454802523	0.429614736	0.438964457	0.509186608	-2.715320257	low
TCGA-EE-A2GI	4.060273973	0	0.233682727	0.304704444	0.511742608	0.544737902	0.209855201	0.176056875	0.298622676	0.505990442	0.392180927	0.408025325	0.454422691	0.19708067	0.526804784	0.312143842	0.331662797	0.282944033	0.375520243	0.377355196	0.219748505	0.310759502	0.403708312	-1.964992082	high
TCGA-EE-A2GJ	6.219178082	0	0.205822563	0.75890035	0.738469424	0.502669284	0.766296622	0.709149165	0.419594212	0.337655597	0.29972138	0.511622978	0.793785343	0.336950438	0.329238613	0.425013464	0.602794059	0.829938094	0.640651034	0.394331615	0.748278681	0.539688125	0.45509749	-2.465683981	low
TCGA-EE-A2GK	4.561643836	0	0.352755539	0.568430059	0.786610015	0.898314125	0.570922514	0.642030287	0.698716761	0.772592616	0.491961772	0.66739167	0.643666415	0.299693021	0.705108686	0.7478329	0.571187344	0.618289285	0.74148526	0.673682404	0.44653963	0.483205021	0.716205675	-2.400604388	low
TCGA-EE-A2GL	6.638356164	0	0.507069172	0.718481084	0.748730289	0.747222526	0.451570053	0.642602344	0.846735663	0.639249818	0.399977606	0.732928639	0.613033067	0.323958513	0.654108569	0.666678844	0.579696129	0.556455686	0.798036384	0.72273894	0.438834675	0.44060996	0.760039782	-3.115885172	low
TCGA-EE-A2GM	6.290410959	0	0.270678181	0.391105398	0.216898637	0.291577329	0.202352545	0.37826433	0.147598056	0.733571131	0.173466379	0.226622997	0.196702485	0.330783339	0.234087435	0.330970561	0.224791115	0.119227108	0.166984301	0.352693456	0.073135688	0.229557628	0.365190519	-1.796977589	high
TCGA-EE-A2GN	8.509589041	1	0.041633878	0.153078108	0.230894061	0.275981833	0.103551087	0.070226275	0.134684846	0.286473805	0.16054488	0.211278354	0.186421166	0.111952493	0.218062282	0.134767993	0.231105903	0.091364145	0.155312947	0.17510357	0.11428922	0.189942887	0.213863895	-0.965936917	high
TCGA-EE-A2GO	10.56712329	0	0.297567205	0.143712117	0.220425906	0.964831042	0.096825585	0.045764282	0.081246218	0.812145424	0.097654118	0.127529409	0.928495749	0.291590584	0.388109451	0.257029575	0.254963266	0.128252701	0.133531264	0.222631807	0.019716295	0.08108527	0.260637478	-4.033355012	low
TCGA-EE-A2GP	1.15890411	1	0.144313154	0.080813096	0.417691972	0.469144997	0.144595181	0.102581161	0.137430248	0.278838313	0.15985943	0.343875378	0.303955298	0.109760705	0.270233409	0.199470088	0.194996119	0.212487705	0.298870331	0.270380981	0.261945846	0.348662637	0.309046392	-1.193422681	high
TCGA-EE-A2GR	3.564383562	1	0.074505238	0.056250366	0.13069438	0.519050255	0.077347895	0.044183254	0.069427626	0.522826641	0.076090758	0.120349884	0.152226566	0.187632056	0.091393586	0.04838854	0.067123755	0.130806161	0.115492686	0.048200649	0.022370854	0.08373868	0.077773496	-2.382438007	low
TCGA-EE-A2GS	6.767123288	1	0.109408585	0.139439756	0.259979502	0.254777873	0.140994241	0.340917086	0.087224137	0.143609339	0.157796955	0.244159209	0.301306213	0.071188797	0.17946795	0.152418024	0.16322803	0.082399447	0.213674628	0.14164834	0.07411178	0.175610207	0.180170304	-1.252270519	high
TCGA-EE-A2GT	3.739726027	0	0.334810585	0.390823427	0.536235942	0.690275214	0.443091999	0.516679978	0.50845567	0.662667089	0.438854117	0.488006182	0.513232169	0.226299439	0.518531889	0.542307504	0.429001806	0.472486405	0.513058545	0.503628229	0.439346846	0.485127665	0.520772115	-2.663641835	low
TCGA-EE-A2GU	7.901369863	0	0.5346789	0.438633154	0.934612919	0.981253277	0.78793092	0.87616211	0.357372246	0.594847548	0.443493655	0.514536218	0.788946703	0.230277358	0.372829723	0.455148838	0.330691523	0.868646586	0.615651045	0.768894125	0.790192368	0.659120272	0.647260975	-3.431431739	low
TCGA-EE-A2M5	1.805479452	1	0.121256035	0.258353668	0.438762553	0.508092904	0.192204704	0.171266063	0.2110647	0.511859437	0.265163946	0.427011869	0.437172078	0.094014977	0.44201611	0.196858188	0.255278518	0.207725188	0.342133475	0.313603621	0.287932734	0.290215406	0.349977175	-2.89451002	low
TCGA-EE-A2M6	10.77260274	0	0.105363498	0.362017071	0.211947267	0.292727235	0.768722132	0.211087572	0.069641478	0.700673083	0.138044704	0.221599657	0.171885897	0.234185753	0.167564639	0.228267533	0.127581046	0.050693471	0.175803279	0.12444752	0.054449082	0.142882167	0.168202218	-3.037772912	low
TCGA-EE-A2M7	2.402739726	1	0.536244448	0.327711026	0.524969065	0.89898507	0.294528689	0.337333861	0.38218697	0.381272487	0.384815174	0.446107685	0.522210394	0.234970156	0.447753636	0.490515578	0.413434713	0.379574637	0.396466364	0.364520579	0.348362391	0.455699875	0.388566177	-3.180352356	low
TCGA-EE-A2M8	1.646575342	1	0.332562476	0.440454863	0.588298848	0.733273741	0.543323631	0.520959179	0.554389184	0.67780971	0.453236203	0.512432486	0.601519718	0.212819667	0.589407083	0.743116812	0.474828833	0.531747655	0.605921706	0.543732973	0.414577737	0.514747135	0.596358762	-1.481560206	high
TCGA-EE-A2MC	5.126027397	1	0.202633613	0.29514349	0.452654501	0.650701148	0.353453108	0.315594139	0.410172134	0.52831809	0.31721893	0.516406068	0.53019017	0.168045625	0.52568692	0.491599232	0.414720384	0.372745554	0.455520408	0.448601656	0.343039176	0.455311736	0.499032285	-1.936119473	high
TCGA-EE-A2MD	3.939726027	1	0.188865251	0.23158815	0.357518778	0.557204296	0.274401684	0.223532252	0.292658077	0.603355208	0.320165036	0.394648261	0.402513622	0.139933291	0.456307495	0.321175576	0.267617781	0.357468338	0.354545709	0.32160364	0.280711883	0.388162926	0.358541912	-2.125102496	high
TCGA-EE-A2ME	8.605479452	1	0.439404551	0.629442377	0.745421031	0.825046061	0.653882429	0.726788198	0.762744308	0.850304954	0.502629676	0.648057585	0.712144394	0.382172117	0.699270317	0.753085445	0.535242693	0.725171719	0.691461508	0.695964981	0.565827162	0.598168762	0.72451885	-3.272189691	low
TCGA-EE-A2MF	22.39452055	1	0.080509007	0.188480474	0.293080597	0.376207819	0.111465066	0.077029526	0.08633615	0.652724266	0.176426933	0.247893561	0.257619604	0.058564544	0.246067733	0.132640311	0.163122226	0.076760132	0.178603961	0.193248941	0.097309571	0.158461423	0.256391463	-2.246375209	high
TCGA-EE-A2MG	8.6	1	0.320594755	0.311734449	0.571715189	0.734031819	0.459266491	0.351794523	0.480206797	0.71450789	0.38410139	0.479899801	0.573503644	0.224718201	0.513886521	0.534857459	0.471490298	0.464647431	0.514891243	0.549222587	0.42764116	0.430297974	0.636365808	-2.59677402	low
TCGA-EE-A2MH	1.41369863	1	0.228703319	0.223525758	0.604348111	0.631647525	0.468498797	0.479368802	0.487600931	0.743152998	0.414205561	0.517588465	0.639431333	0.25081557	0.558751063	0.553996013	0.276247065	0.43009803	0.538057604	0.724422415	0.367675687	0.472816319	0.638303609	-1.78830494	high
TCGA-EE-A2MI	17.05479452	1	0.156096388	0.270873941	0.422804902	0.659514517	0.298266485	0.104417051	0.252444381	0.660854044	0.301288541	0.367417317	0.442053157	0.121583118	0.313756476	0.372130764	0.299271635	0.257043899	0.338285992	0.331956811	0.296219494	0.335389433	0.329263934	-2.502095807	low
TCGA-EE-A2MJ	8.019178082	1	0.275532228	0.32809153	0.538837773	0.666914219	0.424807919	0.373594177	0.566491375	0.843767719	0.430323286	0.52368829	0.563366169	0.264524344	0.512535714	0.525720036	0.454898811	0.494627215	0.578978157	0.497153157	0.455653641	0.476843825	0.566231732	-3.014832973	low
TCGA-EE-A2MK	13.21917808	0	0.168576952	0.19573342	0.506154058	0.66569698	0.869793605	0.14038653	0.205788567	0.432504684	0.297106437	0.325734904	0.873161126	0.088289747	0.348481674	0.316717122	0.308741389	0.176836101	0.366748187	0.256296161	0.32349316	0.365631355	0.303361124	-3.521182407	low
TCGA-EE-A2ML	18.05479452	1	0.503857912	0.32138739	0.809850224	0.494013597	0.304978317	0.748317858	0.800562668	0.506329456	0.306971055	0.415401839	0.443444087	0.173844048	0.357494014	0.33476296	0.358723204	0.287031843	0.386112862	0.450027792	0.302564986	0.386887194	0.465382273	-3.282965661	low
TCGA-EE-A2MM	13.99178082	1	0.075846729	0.128855019	0.179816512	0.232618637	0.186915414	0.140116212	0.096470578	0.105103599	0.143068371	0.250440031	0.935550083	0.061411096	0.158869037	0.139971425	0.26861672	0.080439753	0.150681806	0.108710133	0.049073604	0.137873492	0.152575011	-2.510454682	low
TCGA-EE-A2MN	3.961643836	1	0.228678167	0.36153574	0.814679265	0.391686848	0.692019947	0.806984275	0.185163041	0.487464557	0.254022309	0.312761212	0.371997718	0.202033023	0.316460018	0.241930056	0.302612114	0.543675373	0.269930852	0.27972849	0.527028629	0.549534476	0.323645922	-1.591489488	high
TCGA-EE-A2MP	20.72054795	0	0.502788018	0.268629925	0.44870228	0.705094851	0.25210516	0.130637131	0.290028773	0.504408482	0.25484388	0.38039577	0.549095758	0.180367504	0.276957658	0.322833548	0.302495729	0.33980051	0.382361188	0.28399547	0.342734972	0.402097934	0.369609069	-3.522602123	low
TCGA-EE-A2MQ	3.602739726	1	0.226709176	0.458924845	0.310939727	0.427079816	0.38154612	0.78508775	0.163385189	0.457463149	0.183595994	0.318620009	0.332785668	0.670640891	0.225728871	0.166788223	0.422992218	0.542124563	0.282003769	0.596875524	0.565365747	0.560905635	0.298356353	-1.462752887	high
TCGA-EE-A2MR	11.2	0	0.281492032	0.569168594	0.633098545	0.822794202	0.672849169	0.633047481	0.597360486	0.594120084	0.407418762	0.530999662	0.548137403	0.255360426	0.508931472	0.671230021	0.516665175	0.511337258	0.602799046	0.483243998	0.425542371	0.494686695	0.508930509	-2.316126018	low
TCGA-EE-A2MS	13.53972603	0	0.349425053	0.243520976	0.488275569	0.32831324	0.819226256	0.631145826	0.67667594	0.661997376	0.313446466	0.392853522	0.370329966	0.122189041	0.439177256	0.237393576	0.322683843	0.179087238	0.34212153	0.250593842	0.173843716	0.244298817	0.302682344	-4.3016349	low
TCGA-EE-A2MT	5.934246575	0	0.116219598	0.612653482	0.230013188	0.326503865	0.129792232	0.248864697	0.098881057	0.228398042	0.161782674	0.294367224	0.295973958	0.097394307	0.196328316	0.204735577	0.230674033	0.332195239	0.197853967	0.192467908	0.124886432	0.226249199	0.251793707	-1.323334964	high
TCGA-EE-A2MU	4.438356164	0	0.268126454	0.329989713	0.504762205	0.718397806	0.632273868	0.536207639	0.404870838	0.474062981	0.399579672	0.479153247	0.553206282	0.366829325	0.436532703	0.468192984	0.420700182	0.407409158	0.484422767	0.436144611	0.481381666	0.483208367	0.532547732	-4.031422265	low
TCGA-EE-A3AA	10.35890411	0	0.481765714	0.421579464	0.736877934	0.736149815	0.490370603	0.453849193	0.560460463	0.858988069	0.384029426	0.52451619	0.629600375	0.26983179	0.653297887	0.511838358	0.430002888	0.508359622	0.580993176	0.517381793	0.394947631	0.457636575	0.607411194	-2.955976078	low
TCGA-EE-A3AB	10.22739726	0	0.601122832	0.184215611	0.374279239	0.736078647	0.166673245	0.433882544	0.319249106	0.317284491	0.271125451	0.408579945	0.596898699	0.163496236	0.396899294	0.349701276	0.259794521	0.593872925	0.405249797	0.390303364	0.678904638	0.671495429	0.408904832	-3.416729976	low
TCGA-EE-A3AC	4.301369863	0	0.157926619	0.682313577	0.372239707	0.465362336	0.256136522	0.157719411	0.223665021	0.367707124	0.303237214	0.343347869	0.412467914	0.131983129	0.311037507	0.263176088	0.314626836	0.174193984	0.313223895	0.260038698	0.26340141	0.322074932	0.319841745	-2.858699934	low
TCGA-EE-A3AD	2.397260274	1	0.05521191	0.178027615	0.082084077	0.112737283	0.134120446	0.061618307	0.124645744	0.088618004	0.088699195	0.111092226	0.045826248	0.034395261	0.066090845	0.067676301	0.118071148	0.064041933	0.082757867	0.057758563	0.024548294	0.096672477	0.101853218	-0.681297013	high
TCGA-EE-A3AE	4.542465753	0	0.389994114	0.303014718	0.33950714	0.735505574	0.739440243	0.13540245	0.190088798	0.63444177	0.246333296	0.31606623	0.393650727	0.250871378	0.420991206	0.398155627	0.315392939	0.222947683	0.273508254	0.240340274	0.182901664	0.311698359	0.271190658	-2.997828314	low
TCGA-EE-A3AF	1.150684932	1	0.180024921	0.194946156	0.411627668	0.447599718	0.214244675	0.160830138	0.247611515	0.24357841	0.314611437	0.421776883	0.413258489	0.10807817	0.417153423	0.272803702	0.27095636	0.181302646	0.380458243	0.278042763	0.210136776	0.25735602	0.297794389	-2.014790366	high
TCGA-EE-A3AG	3.465753425	1	0.66226484	0.071001437	0.164491447	0.324657992	0.060099433	0.058147202	0.076808803	0.212441233	0.08648802	0.217828012	0.09787739	0.061385208	0.144162005	0.071426542	0.100278112	0.12826183	0.186442108	0.125370778	0.05656945	0.194710603	0.161828305	-1.821122172	high
TCGA-EE-A3AH	11.56712329	1	0.127153455	0.092738731	0.127807376	0.760965476	0.142057267	0.052002996	0.079055881	0.085118828	0.106175024	0.12812885	0.098357658	0.074355287	0.142850397	0.099539637	0.229396665	0.044740506	0.122369888	0.095975796	0.071111817	0.101174271	0.14561404	-2.069365566	high
TCGA-EE-A3J3	14.34794521	1	0.132567259	0.209577298	0.360981526	0.547361183	0.384406224	0.304921475	0.161929191	0.295294016	0.211131069	0.324103911	0.392356582	0.116262393	0.261710027	0.237109458	0.23758305	0.170151434	0.262349083	0.194092913	0.199821494	0.265533825	0.248758831	-2.665322523	low
TCGA-EE-A3J4	10.6	1	0.101011024	0.888261766	0.780147113	0.281607577	0.486046853	0.684058765	0.453191926	0.920676633	0.16409165	0.257023346	0.8365952	0.418159826	0.367903336	0.146092267	0.487635017	0.131972351	0.257312209	0.798748679	0.096552462	0.212191595	0.736014092	-2.021253781	high
TCGA-EE-A3J5	3.079452055	1	0.174770477	0.296683696	0.402369375	0.533788216	0.204105127	0.155490095	0.221680234	0.307129715	0.261088622	0.358521466	0.374113568	0.19678635	0.321088207	0.262654627	0.249213912	0.236746804	0.31787317	0.319685526	0.253870448	0.307155863	0.355398648	-2.265077135	high
TCGA-EE-A3J7	5.339726027	0	0.581487564	0.482456479	0.683364625	0.764256526	0.184070712	0.662067691	0.099890964	0.841683809	0.211364089	0.43861345	0.481184064	0.595412329	0.196150085	0.363734132	0.576524579	0.174776691	0.561769885	0.547910256	0.129034559	0.231637616	0.555276715	-2.449254633	low
TCGA-EE-A3J8	2.860273973	1	0.697679422	0.091966761	0.100057792	0.150760791	0.047539541	0.416862455	0.046753493	0.060960165	0.066206446	0.100221093	0.043825149	0.124378944	0.080577125	0.049393735	0.257006594	0.629030164	0.356464292	0.060391453	0.877008827	0.746802051	0.112163579	-0.372911865	high
TCGA-EE-A3JA	4.432876712	1	0.114011747	0.18783802	0.452809529	0.409894518	0.300037158	0.083795661	0.203512543	0.402220795	0.336230682	0.367813431	0.35578436	0.085885982	0.389711837	0.205846394	0.228342952	0.275868104	0.286795958	0.259478265	0.39540285	0.436295767	0.310454581	-2.286860192	high
TCGA-EE-A3JB	16.81643836	0	0.419143062	0.225008468	0.317457306	0.791700936	0.193119191	0.079110939	0.231845435	0.431538402	0.214384448	0.324344293	0.534238278	0.37709675	0.522854325	0.271573141	0.260940941	0.488845166	0.284714058	0.247674602	0.463844504	0.506014985	0.290309451	-3.267715596	low
TCGA-EE-A3JE	4.279452055	0	0.364272872	0.502935499	0.672836274	0.720291936	0.557281422	0.410299222	0.4902193	0.606531653	0.385899098	0.50613954	0.594312999	0.228644273	0.532997242	0.554482867	0.487328033	0.49014818	0.586326435	0.464455717	0.513328393	0.527883667	0.511628049	-2.36404664	low
TCGA-EE-A3JH	9.131506849	0	0.24651023	0.501162306	0.589493722	0.698516721	0.685496455	0.481960107	0.786005512	0.645366275	0.400122584	0.509824818	0.604111348	0.247632392	0.567679251	0.585345181	0.452965844	0.524846298	0.621564266	0.501625172	0.491662996	0.4669184	0.572156876	-3.260486892	low
TCGA-EE-A3JI	12.73424658	1	0.272686469	0.173307628	0.519044496	0.715760522	0.348328964	0.890422751	0.619080853	0.156808512	0.211925086	0.505244489	0.900160239	0.276314436	0.380446685	0.119979795	0.32174261	0.92438727	0.830171886	0.265682934	0.894936728	0.734225512	0.280984594	-3.545000291	low
TCGA-ER-A193	2.616438356	1	0.175355123	0.282875128	0.615618817	0.646642613	0.352197722	0.372266581	0.406322408	0.547463287	0.30623914	0.407572342	0.594121798	0.261676522	0.384065543	0.355708604	0.312071199	0.330493737	0.40882249	0.350667974	0.341395271	0.406625292	0.347332319	-2.745020502	low
TCGA-ER-A196	4.890410959	0	0.150418936	0.118696383	0.484576297	0.611633052	0.202437361	0.116201346	0.372039889	0.50093211	0.227934584	0.481425996	0.350235591	0.128874382	0.470322864	0.297387764	0.266936281	0.19536455	0.516755979	0.368737039	0.263991382	0.33712848	0.42449355	-1.86159878	high
TCGA-ER-A197	1.161643836	1	0.182550424	0.26411151	0.440703328	0.560183036	0.689027956	0.198650568	0.291296911	0.337774289	0.351777206	0.628652071	0.481193216	0.178183379	0.486253786	0.442515861	0.280462187	0.291245101	0.694501195	0.296329843	0.266278526	0.335006508	0.430576324	-2.864733966	low
TCGA-ER-A199	0.764383562	1	0.284172223	0.502103667	0.553130983	0.721017622	0.347191649	0.361259621	0.368440089	0.564597661	0.361100159	0.463611263	0.560436865	0.203707842	0.521029417	0.621129836	0.475037844	0.520998309	0.546548674	0.397966616	0.379021484	0.436768279	0.472764102	-1.095121669	high
TCGA-ER-A19D	1.049315068	1	0.184082642	0.16977273	0.294954827	0.356285739	0.163984214	0.128962591	0.137261797	0.231047831	0.244610944	0.301061983	0.265392961	0.102388194	0.259371527	0.187464642	0.299880798	0.149418364	0.281851965	0.212810176	0.114797203	0.223387168	0.262077543	-0.990370149	high
TCGA-ER-A19E	1.084931507	1	0.125411664	0.091603993	0.2958464	0.455637373	0.134181648	0.106594543	0.136817572	0.198020542	0.176989505	0.264953441	0.313236165	0.068432222	0.246978016	0.242150798	0.206227451	0.145466678	0.184718007	0.177837921	0.257504717	0.287107952	0.207387189	-1.733336483	high
TCGA-ER-A19K	1.284931507	1	0.218908577	0.501508982	0.44376956	0.523282019	0.279398858	0.201236043	0.368393726	0.457010889	0.261454399	0.37782519	0.393331661	0.17154902	0.354313097	0.34088638	0.272483461	0.281671312	0.358043497	0.346502815	0.278884317	0.373613233	0.388834948	-2.308625983	low
TCGA-ER-A19M	5.087671233	1	0.619932631	0.328430681	0.540010868	0.615951196	0.392702011	0.341374712	0.497321105	0.598083151	0.424207319	0.452532036	0.523696145	0.195308982	0.474655529	0.363011464	0.482668987	0.417373053	0.450195436	0.535867186	0.443944703	0.480259578	0.561657003	-3.22196661	low
TCGA-ER-A19T	0.739726027	1	0.181785985	0.041094801	0.051281726	0.120282184	0.057774067	0.042198748	0.060529685	0.056277585	0.058102501	0.063248339	0.039153973	0.10317253	0.047668938	0.044981241	0.086151772	0.037692865	0.063144911	0.057921276	0.025972144	0.053841585	0.075321257	-0.790326516	high
TCGA-ER-A2NB	2.347945205	1	0.311241687	0.349421819	0.650103426	0.623758323	0.325098498	0.70046189	0.339158313	0.775834847	0.304144063	0.438417597	0.527725865	0.184429116	0.433051298	0.460870472	0.381385537	0.324407339	0.479153568	0.419981646	0.380985123	0.42946622	0.422152704	-2.291108861	high
TCGA-ER-A2NC	3.652054795	1	0.350692916	0.108673564	0.296541134	0.533139012	0.149599239	0.094118534	0.232658074	0.462537478	0.131587017	0.311290041	0.230665445	0.104197985	0.363010598	0.272710729	0.248306356	0.094337249	0.280207479	0.256836096	0.135571944	0.232547881	0.305542809	-1.747390502	high
TCGA-ER-A2ND	1.945205479	1	0.117393161	0.14159269	0.811691772	0.50620411	0.785304281	0.069372966	0.212147788	0.61697158	0.235849447	0.337792638	0.316755937	0.524812285	0.293167553	0.240716489	0.200410455	0.104957815	0.305666617	0.214229982	0.136652805	0.219591303	0.252248017	-2.933533732	low
TCGA-ER-A2NF	2.402739726	1	0.228500225	0.328157851	0.433062027	0.508229616	0.271016654	0.22058985	0.318816358	0.370337478	0.31440828	0.393114848	0.501362581	0.17406635	0.374688421	0.379824389	0.341332923	0.295879576	0.360880732	0.308780074	0.345398472	0.366230509	0.37184823	-2.539972978	low
TCGA-ER-A2NG	4.082191781	1	0.355209207	0.655966056	0.527000968	0.679169843	0.527788352	0.444405384	0.461383289	0.758035936	0.368239713	0.494363635	0.576266651	0.224236706	0.459266926	0.533139089	0.50884604	0.469674466	0.501437291	0.488626012	0.433094494	0.421002281	0.536967053	-3.26177663	low
TCGA-ER-A2NH	3.463013699	0	0.36020966	0.497642186	0.504444451	0.579904281	0.375827941	0.553507294	0.610572951	0.866561952	0.468060431	0.44544522	0.57155609	0.192231336	0.640189341	0.509991744	0.39998906	0.410781691	0.473403701	0.520204451	0.348835043	0.382265361	0.56340331	-3.348944398	low
TCGA-ER-A3ET	7.750684932	1	0.148184669	0.169248655	0.533350038	0.546284638	0.307587809	0.447368588	0.137253026	0.292699846	0.207404643	0.448740168	0.346066935	0.120001776	0.28149602	0.305368564	0.278248944	0.145043032	0.467107764	0.363389478	0.190764182	0.274308972	0.421976536	-1.413643788	high
TCGA-ER-A3EV	3.915068493	1	0.132739129	0.203113312	0.310388631	0.342401731	0.133423317	0.092613167	0.13527506	0.259310452	0.241840274	0.33074307	0.34050818	0.089997624	0.267202446	0.180889239	0.221080252	0.177100287	0.315210597	0.274995496	0.253159486	0.317261903	0.314708597	-1.515771103	high
TCGA-ER-A3PL	2.767123288	0	0.052982371	0.111296301	0.212321282	0.718218819	0.738443368	0.054323434	0.120309123	0.15833304	0.153521357	0.258363799	0.598463407	0.114325704	0.188400516	0.260727004	0.226342428	0.256653812	0.219362871	0.147118876	0.075762151	0.17699422	0.169915968	-2.333887217	low
TCGA-ER-A42K	1.079452055	1	0.341937499	0.083530701	0.37524967	0.910859611	0.12975374	0.067939243	0.124712449	0.121644119	0.221176169	0.288368899	0.335424459	0.101032105	0.255119689	0.195558707	0.295454021	0.155477067	0.229365103	0.192825618	0.19143053	0.252604132	0.230150645	-2.771219837	low
TCGA-ER-A42L	12.41917808	0	0.524298135	0.36524649	0.596893128	0.800065563	0.446459347	0.46275432	0.381043219	0.628884398	0.398491396	0.495315173	0.60327371	0.309806286	0.452811688	0.426360196	0.407185772	0.456931942	0.562172101	0.435957913	0.466235894	0.482383427	0.483170318	-3.898423243	low
TCGA-FR-A2OS	1.008219178	1	0.056909419	0.046105195	0.21214766	0.34231543	0.126205164	0.087338515	0.127994549	0.204783848	0.125098133	0.253640279	0.144931339	0.056508256	0.245374786	0.123441875	0.125450884	0.080429403	0.212133568	0.180469312	0.127374334	0.17739757	0.212631732	-1.271160158	high
TCGA-FR-A3R1	1.876712329	0	0.526987425	0.781364714	0.836289767	0.960012316	0.774641358	0.665744899	0.906330618	0.868149701	0.432215313	0.322764732	0.827060146	0.713925165	0.403129419	0.571655651	0.3669213	0.359493444	0.342351016	0.726473804	0.342108492	0.385792592	0.772823541	-7.00231424	low
TCGA-FR-A3YN	7.747945205	0	0.157914389	0.190929822	0.465476228	0.49080206	0.669044406	0.119694913	0.257315061	0.392234045	0.257821623	0.327605419	0.374894537	0.190384469	0.250476519	0.279862201	0.291402441	0.333225869	0.235291738	0.289575487	0.360045545	0.390787762	0.30183807	-2.356720375	low
TCGA-FR-A44A	14.51780822	0	0.387169809	0.417344487	0.554324499	0.723993348	0.508811564	0.474375444	0.755678506	0.655295233	0.416395353	0.535950571	0.630787385	0.264419478	0.467645444	0.581996695	0.464831833	0.589900775	0.558670293	0.493669005	0.570862612	0.543761898	0.593433919	-4.182151071	low
TCGA-FR-A728	1.597260274	0	0.264239073	0.539234298	0.430477363	0.534248151	0.426394019	0.383271682	0.455234465	0.762293285	0.34298798	0.464059609	0.621014183	0.379302276	0.446894541	0.528694861	0.329525285	0.362984046	0.453381676	0.448886256	0.396904897	0.414166479	0.477771063	-3.919692758	low
TCGA-FR-A729	18.4	0	0.236005107	0.234829829	0.481191077	0.62184781	0.306231685	0.368664418	0.421677614	0.64327648	0.288925457	0.478640487	0.549512799	0.171314619	0.33938858	0.513957674	0.352342009	0.240393339	0.453530658	0.316424037	0.414075724	0.362686553	0.358558079	-3.793044644	low
TCGA-FR-A7U9	1.564383562	0	0.220105862	0.290180491	0.472897396	0.604701576	0.329456231	0.252718353	0.319832164	0.532039063	0.304482205	0.4167195	0.452036395	0.159943544	0.355846119	0.413374061	0.335795288	0.326844871	0.429545077	0.408621704	0.359383344	0.372429534	0.456306561	-2.298728379	high
TCGA-FR-A7UA	3.189041096	0	0.383521683	0.571198085	0.802581923	0.776543543	0.587932479	0.655836549	0.692868408	0.863145649	0.457450789	0.595740539	0.723647387	0.284048496	0.594479447	0.750455716	0.445932492	0.671268527	0.61133447	0.537625349	0.609471531	0.538098875	0.651560619	-4.141263158	low
TCGA-FR-A8YC	2.901369863	1	0.137731891	0.306172144	0.77481042	0.338351903	0.118174767	0.913468911	0.131267017	0.544894739	0.21548457	0.296596454	0.540729098	0.242516581	0.228918543	0.291132412	0.307672621	0.17164567	0.268933922	0.265806412	0.150369545	0.225914126	0.292526043	-1.495237394	high
TCGA-FR-A8YD	3.021917808	1	0.214417819	0.304221366	0.592129572	0.294607603	0.686871238	0.844910374	0.114701544	0.546251547	0.148744882	0.259851691	0.344921162	0.216175745	0.488413227	0.173814411	0.240049167	0.051025516	0.201926003	0.292214582	0.075271858	0.169382765	0.340110572	-2.09939523	high
TCGA-FR-A8YE	8.701369863	0	0.282005189	0.382178583	0.589386614	0.689635394	0.446183236	0.478760607	0.524012893	0.675244898	0.412688769	0.56810682	0.580083513	0.235923675	0.550789868	0.584163475	0.491971785	0.490345401	0.624744638	0.508024006	0.426064984	0.463732289	0.577619285	-2.305136553	low
TCGA-FS-A1YW	18.07671233	1	0.463855472	0.233467342	0.811126842	0.903398239	0.168770023	0.142704099	0.174699009	0.373206546	0.285711891	0.50498364	0.384292254	0.225861948	0.283225592	0.208753108	0.307304701	0.183852393	0.471963004	0.282108574	0.159845698	0.210165403	0.269393843	-3.252141288	low
TCGA-FS-A1YX	4.049315068	1	0.105584513	0.288917887	0.782113623	0.575608814	0.569602841	0.100532693	0.188239655	0.413724641	0.204897012	0.351517851	0.317498527	0.128294234	0.268563555	0.304451495	0.337368714	0.116065288	0.32521286	0.299678037	0.203507461	0.284823114	0.293166704	-0.823593297	high
TCGA-FS-A1YY	19.04931507	1	0.409565619	0.226057491	0.300618391	0.593624377	0.720006176	0.731653455	0.090680816	0.366679866	0.21282832	0.327130948	0.241492806	0.563746394	0.320434878	0.439470282	0.204615696	0.136829178	0.326608668	0.196529414	0.115713384	0.2054564	0.276435073	-3.921859465	low
TCGA-FS-A1Z0	16.88767123	1	0.219840695	0.246964177	0.408557593	0.450049465	0.208956508	0.180520622	0.23130598	0.404746251	0.293781415	0.407846966	0.513142613	0.097266069	0.322961289	0.288165452	0.230008579	0.220752251	0.369965393	0.278377893	0.244451553	0.362656199	0.346044068	-2.457010554	low
TCGA-FS-A1Z4	2.339726027	1	0.335068421	0.437486885	0.687315373	0.729581029	0.429802267	0.500052618	0.587499073	0.816731372	0.366536861	0.503675269	0.502249557	0.252935734	0.531050383	0.654880347	0.450513045	0.519216051	0.543179592	0.473135456	0.494640598	0.497703594	0.474602402	-2.228190302	high
TCGA-FS-A1Z7	0.649315068	1	0.052698612	0.20289526	0.397130811	0.412357008	0.279854302	0.082998109	0.142156122	0.489662564	0.192085083	0.296911116	0.257990007	0.116238941	0.269167154	0.231015788	0.301396704	0.173912745	0.246755561	0.258802382	0.116494674	0.291042732	0.298815658	-0.358772998	high
TCGA-FS-A1ZA	2.309589041	1	0.559854602	0.352165044	0.379812606	0.805923454	0.148184227	0.224626324	0.199898968	0.571660824	0.228500947	0.352593417	0.462887999	0.149426585	0.430266617	0.316347492	0.38821767	0.770781664	0.40866475	0.325128889	0.759149836	0.60874235	0.327962416	-2.387499811	low
TCGA-FS-A1ZB	4.071232877	1	0.173432042	0.176869087	0.397761486	0.491929456	0.181383183	0.063136067	0.27404838	0.221371255	0.2192543	0.355653045	0.411236191	0.112243084	0.309282586	0.219767118	0.343917544	0.165019147	0.356346263	0.296078111	0.178313292	0.272622252	0.324420196	-1.183178527	high
TCGA-FS-A1ZD	4.460273973	1	0.054391869	0.154864186	0.408633563	0.778726395	0.481644405	0.054616289	0.165238239	0.141954028	0.135349789	0.184169806	0.232090875	0.057336516	0.347238571	0.209446802	0.298534115	0.07747441	0.147113468	0.119880741	0.04699631	0.130214245	0.205293946	-1.310768306	high
TCGA-FS-A1ZE	3.871232877	1	0.065199674	0.117223894	0.173099416	0.169924336	0.075259877	0.354094245	0.075871388	0.444914855	0.109870197	0.1374948	0.113798679	0.091074834	0.181625017	0.0803344	0.099698673	0.078019936	0.102824498	0.101876782	0.029918257	0.127482984	0.130570568	-1.109437021	high
TCGA-FS-A1ZF	1.287671233	1	0.088754653	0.111402181	0.47515297	0.276634551	0.10939069	0.084019523	0.09898188	0.230331368	0.106196093	0.169329616	0.220714305	0.078098053	0.179282787	0.140985151	0.17380225	0.07449571	0.173202594	0.130460545	0.059357341	0.148838003	0.167947296	0.023404398	high
TCGA-FS-A1ZG	0.808219178	1	0.0541631	0.196246207	0.136773796	0.585643282	0.567521779	0.144658495	0.073489233	0.132942764	0.087271412	0.164321848	0.149590209	0.097145637	0.11064271	0.37374188	0.177218676	0.057937388	0.153238063	0.240103512	0.034013305	0.110390415	0.211161205	-0.785483914	high
TCGA-FS-A1ZH	2.728767123	1	0.18210683	0.262529348	0.374999117	0.481725382	0.272107051	0.159722296	0.336372381	0.469669318	0.297553866	0.38871223	0.433744812	0.142244574	0.333484278	0.336742195	0.403978553	0.354903602	0.332074783	0.329831207	0.354274818	0.423180286	0.412626208	-1.939733606	high
TCGA-FS-A1ZJ	3.947945205	1	0.078084988	0.111607296	0.267491949	0.193690264	0.144960987	0.694508594	0.079886025	0.259229605	0.248906611	0.2833589	0.270072413	0.091935988	0.203479715	0.263990523	0.238617353	0.090578779	0.2359617	0.169359915	0.024406793	0.132835131	0.196222157	-1.014367884	high
TCGA-FS-A1ZK	1.994520548	1	0.054651766	0.06753786	0.71975412	0.231622638	0.123918008	0.045055971	0.084512331	0.759862117	0.091072551	0.184325206	0.123572524	0.074707903	0.162867957	0.101134969	0.163918575	0.080979358	0.138898546	0.209933118	0.040771433	0.130575301	0.233827942	0.219375646	high
TCGA-FS-A1ZM	8.438356164	0	0.369009488	0.263326347	0.763526161	0.835118397	0.595940374	0.404299341	0.345994036	0.427788955	0.312867386	0.428129528	0.541441638	0.236516992	0.482760952	0.390353447	0.292609771	0.348584606	0.43516068	0.295035266	0.358893573	0.380593571	0.311610257	-3.233332592	low
TCGA-FS-A1ZN	2	1	0.070141233	0.173524938	0.309822358	0.158577865	0.082654997	0.083628618	0.094809119	0.264718173	0.092898683	0.16457186	0.27460097	0.074007137	0.128385618	0.093755692	0.16421533	0.084967229	0.108486365	0.103858936	0.044844254	0.150918962	0.162303701	-0.685459062	high
TCGA-FS-A1ZP	6.22739726	1	0.176579419	0.196554088	0.574486261	0.381654565	0.170471794	0.808330143	0.153512024	0.645570983	0.240448394	0.333759598	0.285665006	0.090977599	0.302534925	0.244846375	0.209673368	0.161832429	0.274814998	0.25147231	0.159771283	0.219395969	0.256501101	-2.066662396	high
TCGA-FS-A1ZR	0.950684932	1	0.20534261	0.133489881	0.234455911	0.326318532	0.164792361	0.108532989	0.105133418	0.335357144	0.205648448	0.248765482	0.304397025	0.095272511	0.204709305	0.180161885	0.161358041	0.115280845	0.202238052	0.229512108	0.134971666	0.193799271	0.258597786	-1.979689902	high
TCGA-FS-A1ZS	12.4	0	0.487649693	0.882788337	0.797028822	0.928651478	0.119212389	0.527887778	0.089160237	0.822449509	0.410872406	0.24142946	0.47116643	0.47028466	0.224826251	0.124461948	0.39308186	0.140190963	0.207179468	0.497100376	0.090864869	0.162148367	0.45697768	-4.873358928	low
TCGA-FS-A1ZT	4.430136986	0	0.158239304	0.17981263	0.412639938	0.497326647	0.264571956	0.17815617	0.415159266	0.420827355	0.382324232	0.382759008	0.468955369	0.161328884	0.418882514	0.340219346	0.314966878	0.415520422	0.363159718	0.348938114	0.353536096	0.422124575	0.38537631	-1.880267889	high
TCGA-FS-A1ZU	2.21369863	1	0.261534856	0.120263335	0.16652893	0.22842483	0.133696956	0.602981397	0.095049507	0.139948701	0.075688549	0.200707466	0.219863727	0.092385008	0.193497856	0.090073123	0.152588678	0.114930603	0.144028837	0.132378128	0.025917484	0.130959502	0.135509981	-1.378700104	high
TCGA-FS-A1ZW	4.123287671	0	0.306900299	0.309649438	0.526120993	0.564207029	0.380898123	0.455951748	0.527123183	0.760494186	0.294118744	0.388449818	0.464807518	0.227275859	0.497737673	0.439683742	0.342470701	0.509174317	0.413405066	0.404701392	0.480395982	0.501956065	0.463127007	-2.450163749	low
TCGA-FS-A1ZY	2.257534247	1	0.048170941	0.109512191	0.067092517	0.075433261	0.070973807	0.042728374	0.082806608	0.312050351	0.065729386	0.121129426	0.045839761	0.106546582	0.058988388	0.061863668	0.114626993	0.038613921	0.111619238	0.051356266	0.015526919	0.04893803	0.094824292	-0.993707177	high
TCGA-FS-A1ZZ	2.252054795	1	0.068433999	0.270084859	0.154268181	0.544356243	0.413888686	0.083246027	0.08303197	0.455633186	0.150190601	0.220368188	0.867452283	0.049540909	0.136019603	0.086028696	0.126157825	0.093893597	0.158215685	0.096955169	0.040231401	0.190794286	0.152990162	-4.242553575	low
TCGA-FS-A4F0	6.484931507	0	0.817709862	0.934180757	0.951485257	0.949102775	0.893469465	0.929678637	0.928341304	0.401377002	0.366629948	0.677823933	0.567643361	0.538775527	0.39442572	0.23075044	0.729549968	0.933456089	0.891694586	0.704247327	0.957616318	0.753722043	0.653467866	-5.451630761	low
TCGA-FS-A4F2	4.178082192	1	0.047609246	0.057816578	0.262740404	0.452306841	0.319943481	0.054691622	0.142802873	0.268896818	0.146082014	0.321493645	0.262212461	0.148709845	0.386585254	0.12608098	0.206920181	0.088895477	0.259823081	0.207525337	0.120018232	0.236039584	0.202979171	-1.35555973	high
TCGA-FS-A4F4	5.556164384	1	0.127662136	0.184085569	0.502735447	0.356993637	0.622405155	0.130159507	0.547141928	0.273148907	0.253449911	0.373157608	0.387804824	0.107128128	0.288870174	0.289636414	0.176089315	0.219555447	0.318773273	0.225497781	0.27630483	0.339512017	0.267668435	-2.850594123	low
TCGA-FS-A4F5	2.394520548	1	0.040786917	0.426521791	0.237266857	0.227720604	0.795225945	0.084556663	0.438920897	0.230528976	0.051929184	0.108132608	0.097520616	0.036463287	0.118376172	0.105212879	0.240827163	0.055495688	0.122811661	0.320603526	0.022988847	0.099009368	0.28482374	-0.774671094	high
TCGA-FS-A4F8	14.56986301	1	0.452215453	0.451040458	0.614223139	0.654148438	0.419164389	0.445097631	0.562526727	0.773198856	0.398832663	0.474855046	0.675438985	0.349784043	0.522227962	0.579667966	0.591268365	0.457478383	0.460094692	0.45491781	0.4757774	0.447129066	0.501655295	-3.410351412	low
TCGA-FS-A4F9	2.835616438	0	0.74294372	0.731968599	0.875331471	0.299491968	0.119104947	0.93297113	0.178420158	0.896111057	0.418151292	0.762044627	0.916781982	0.617899023	0.15294945	0.186936611	0.790610911	0.924645268	0.834207399	0.257832077	0.884827032	0.750512034	0.232528434	-4.408395572	low
TCGA-FS-A4FB	2.22739726	1	0.271438094	0.050885761	0.168858665	0.158513692	0.048754976	0.071402948	0.050491847	0.413889632	0.071050632	0.121062295	0.042669827	0.027050431	0.103133839	0.085882775	0.130485495	0.039494706	0.070213769	0.051233491	0.027760107	0.083156682	0.065275262	-0.986663735	high
TCGA-FS-A4FC	4.534246575	1	0.457859937	0.722264043	0.659524001	0.667012969	0.219357891	0.640441287	0.174892108	0.34735937	0.279761054	0.324067394	0.63849773	0.167653562	0.384611998	0.214085153	0.607883829	0.496818554	0.279259678	0.45381715	0.350469205	0.303880415	0.459328876	-1.910292468	high
TCGA-FS-A4FD	6.723287671	1	0.220680999	0.062765424	0.144871188	0.320125282	0.087706971	0.056427822	0.079494703	0.285748826	0.159780627	0.189953218	0.252080702	0.040653409	0.176505872	0.173984858	0.108942931	0.053199955	0.132826667	0.148550627	0.082359025	0.155570839	0.184384943	-1.871079888	high
TCGA-FW-A3TV	1.126027397	0	0.237263648	0.277847288	0.465214128	0.528842595	0.276550835	0.216688758	0.317253129	0.390428463	0.398299326	0.387911861	0.422036938	0.162737759	0.455500651	0.364041659	0.327934634	0.305293574	0.372515882	0.451504377	0.298448997	0.358392345	0.456523663	-1.696616434	high
TCGA-GF-A3OT	0.824657534	0	0.384261856	0.26051816	0.488610534	0.830810391	0.263936854	0.192808872	0.343350377	0.811965712	0.292494811	0.425502008	0.42277633	0.168799571	0.540121377	0.373590218	0.304667571	0.341549813	0.490154896	0.408378697	0.296289977	0.323653274	0.443571627	-2.796986339	low
TCGA-GF-A4EO	1.619178082	0	0.394408453	0.455102005	0.625761823	0.748210022	0.57392574	0.509891181	0.642207417	0.652992366	0.429986809	0.556625521	0.580805626	0.258502724	0.567272821	0.678044545	0.500201913	0.484351274	0.593487814	0.496114896	0.520051235	0.490133487	0.579772565	-3.476791497	low
TCGA-GN-A263	1.279452055	1	0.163230004	0.280975128	0.391523324	0.530270715	0.248144377	0.182805001	0.328085957	0.570656021	0.273046543	0.415490638	0.416015065	0.115974642	0.382919473	0.38744194	0.478528187	0.230980593	0.370206691	0.382411253	0.313519147	0.384672329	0.399269586	-1.413962113	high
TCGA-GN-A267	5.369863014	1	0.160713118	0.193929784	0.726295376	0.393716036	0.193078629	0.208481184	0.311886448	0.368946527	0.262157999	0.351106876	0.377439792	0.191795277	0.274504289	0.274886763	0.238918932	0.207837616	0.326875498	0.312858812	0.222072695	0.320144902	0.323928393	-1.078551349	high
TCGA-GN-A268	5.232876712	1	0.779019698	0.454889966	0.839939686	0.188644163	0.909418092	0.918183577	0.545826344	0.602055585	0.094379256	0.759765766	0.265249016	0.819441629	0.373099781	0.36644701	0.577453515	0.638083235	0.66999571	0.53380844	0.628915262	0.587683553	0.548801947	-3.539799178	low
TCGA-GN-A269	0.465753425	1	0.137852994	0.199197934	0.47298013	0.632069054	0.250468668	0.214648141	0.389123456	0.655458729	0.254556181	0.458723263	0.401504282	0.143753057	0.457374343	0.34156597	0.393278378	0.301356761	0.499169069	0.445015617	0.398731029	0.379091625	0.467065255	-1.931973741	high
TCGA-GN-A26A	2.706849315	1	0.14649847	0.1318445	0.411151509	0.541636302	0.165654951	0.197304836	0.275036772	0.297076599	0.232488521	0.434887327	0.326916524	0.167330142	0.430088069	0.24209576	0.230412862	0.218014898	0.447838671	0.318604246	0.288271539	0.332969826	0.364868728	-1.961757762	high
TCGA-GN-A26C	2.249315068	1	0.336720789	0.598035663	0.820763289	0.854582881	0.718806592	0.422379691	0.513990282	0.539922304	0.364346696	0.483830636	0.558035699	0.235585682	0.427864381	0.501817536	0.44685076	0.580545368	0.480689003	0.440688401	0.444453821	0.528961042	0.475028963	-2.510526271	low
TCGA-GN-A4U3	10.15890411	0	0.102696863	0.055661559	0.194802529	0.299252182	0.132203009	0.056319064	0.085816692	0.144505775	0.141773693	0.208866944	0.186267473	0.159443551	0.157287923	0.090699231	0.14799783	0.066140802	0.146041486	0.155208764	0.133160889	0.146194064	0.159963646	-1.818329572	high
TCGA-GN-A4U7	0.868493151	1	0.029476005	0.144340339	0.131164531	0.228261324	0.838863716	0.038332895	0.075919407	0.188553592	0.077216304	0.201650823	0.138376875	0.05399609	0.120386643	0.192637706	0.149768644	0.045511533	0.13278126	0.116284471	0.093421166	0.119569905	0.133535855	-1.627071395	high
TCGA-GN-A4U9	1.843835616	1	0.232968443	0.061524043	0.150814312	0.363965033	0.051719876	0.694609136	0.054253736	0.353465128	0.193009177	0.239864692	0.262329303	0.107127227	0.232856994	0.185753324	0.131876745	0.120721847	0.249119565	0.111432779	0.105362761	0.155283104	0.139048663	-2.422231433	low
TCGA-HR-A2OH	5.490410959	1	0.335086077	0.441791452	0.596428618	0.603914206	0.653741739	0.621450037	0.603206435	0.837058105	0.467977534	0.544251475	0.626531569	0.312687693	0.478130599	0.56864765	0.366430689	0.623558338	0.524010097	0.512680312	0.516982979	0.503510399	0.578788966	-4.332799167	low
TCGA-IH-A3EA	1.435616438	0	0.22984167	0.724147425	0.305612805	0.410302114	0.723522262	0.528694717	0.235574162	0.832756628	0.213373116	0.336985725	0.459115269	0.143455583	0.385721126	0.195751306	0.260046897	0.261606212	0.348596558	0.259963032	0.229134679	0.313871819	0.294434317	-3.757062147	low
TCGA-QB-A6FS	0.602739726	0	0.195374413	0.291964697	0.477959296	0.581414403	0.384757619	0.264608565	0.365154352	0.53102119	0.333526364	0.406549464	0.550982222	0.152758334	0.397269884	0.326754638	0.370239439	0.383188461	0.373839129	0.379011367	0.439227361	0.424403279	0.465933397	-3.159574111	low
TCGA-W3-A824	19.01369863	0	0.470969657	0.617929888	0.807674522	0.47067362	0.830117684	0.8925212	0.916668929	0.81226255	0.279259218	0.772867387	0.707595521	0.501619228	0.352330853	0.590070843	0.585364779	0.31781321	0.851169292	0.62320852	0.310815702	0.347147599	0.586188469	-4.440627414	low
TCGA-W3-A825	5.252054795	1	0.171615889	0.12862263	0.360015045	0.413490018	0.211761532	0.180815416	0.318216809	0.295950561	0.285878156	0.298539997	0.34390308	0.111305754	0.267817743	0.235563368	0.234032354	0.163331466	0.266393579	0.232699069	0.204547491	0.266184442	0.238116862	-2.13946228	high
TCGA-W3-A828	10.09041096	1	0.28869993	0.083572724	0.325866838	0.573193235	0.135087489	0.089720855	0.108577333	0.472685185	0.161326382	0.313483505	0.350850466	0.070514809	0.21175045	0.263141877	0.230271128	0.650590182	0.26862388	0.21053546	0.614110602	0.508354948	0.218827294	-1.694519563	high
TCGA-W3-AA1R	9.257534247	1	0.124381787	0.155973494	0.710126499	0.478745258	0.754899211	0.27735331	0.192665301	0.093428326	0.208379685	0.290691835	0.355723639	0.224322637	0.247752934	0.178667635	0.207532166	0.271450055	0.224680509	0.297588161	0.286766134	0.285002753	0.36443229	-2.131728088	high
TCGA-W3-AA1V	3.506849315	1	0.161312474	0.306958984	0.291595093	0.351142413	0.654139614	0.811779501	0.177766105	0.776761432	0.155201827	0.274283647	0.172889534	0.11553075	0.232744615	0.164665769	0.181715317	0.090620366	0.237157083	0.735033748	0.189326176	0.236632137	0.789910615	-2.915100642	low
TCGA-W3-AA1W	18.2630137	0	0.580104202	0.776057536	0.846771352	0.962210177	0.75944806	0.769530157	0.681304007	0.920587189	0.505337496	0.591598759	0.802361125	0.462895352	0.745743968	0.864409738	0.420665131	0.801504245	0.745262174	0.769869495	0.471106394	0.442686416	0.816012469	-3.471719188	low
TCGA-W3-AA21	8.753424658	1	0.423081617	0.374729154	0.694769306	0.359894419	0.570452464	0.422059231	0.190228578	0.408291793	0.232658149	0.26813254	0.234738316	0.411159276	0.177087684	0.223315492	0.278692905	0.139157251	0.289664715	0.265531232	0.120168505	0.184461643	0.274733854	-2.287030404	high
TCGA-WE-A8JZ	2.002739726	0	0.104409457	0.078800316	0.193872273	0.299534345	0.638133514	0.084142243	0.095091048	0.129140995	0.135961106	0.204606481	0.253790562	0.077705763	0.196309167	0.123548018	0.181390405	0.074267405	0.184378065	0.15487527	0.104721852	0.171779922	0.208612956	-1.612923198	high
TCGA-WE-A8K1	4.087671233	0	0.266985547	0.428608492	0.491426438	0.60049789	0.436581113	0.327727216	0.494661323	0.693803497	0.390935421	0.487711512	0.526162585	0.285673658	0.445723414	0.525205165	0.465091551	0.40867279	0.421124122	0.504028652	0.420097319	0.473507747	0.58669542	-3.157781856	low
TCGA-WE-A8K5	5.095890411	1	0.130950393	0.752135302	0.661128578	0.63516633	0.412789716	0.615963261	0.194586159	0.528499553	0.23610746	0.315680239	0.768331791	0.292079271	0.265121596	0.309378806	0.264830999	0.248793546	0.245773457	0.254058787	0.141404835	0.248620149	0.285554319	-3.75005302	low
TCGA-WE-A8ZO	5.635616438	0	0.129116893	0.731874783	0.359874051	0.336982981	0.284643104	0.832403016	0.166886843	0.688916879	0.24046213	0.344638003	0.355305308	0.108569051	0.249268918	0.228183954	0.420950152	0.235731788	0.247363549	0.225273889	0.194726246	0.301354994	0.296340683	-2.743023038	low
TCGA-WE-A8ZQ	4.980821918	0	0.236541509	0.305954611	0.729369274	0.83737182	0.160153859	0.491154803	0.09708179	0.151356721	0.048761408	0.278495532	0.216852867	0.191822982	0.124697626	0.047925983	0.268425504	0.048313484	0.234568431	0.168667377	0.020231743	0.086310585	0.178589409	-2.323620764	low
TCGA-WE-A8ZR	0.750684932	1	0.119898025	0.217776648	0.301127601	0.371189975	0.439172441	0.080965717	0.138782659	0.489387406	0.158488573	0.285086661	0.244153018	0.153626291	0.212242164	0.240693279	0.210909359	0.216225939	0.215103842	0.366143763	0.14192511	0.232548797	0.400418206	-1.298991169	high
TCGA-WE-A8ZT	0.983561644	0	0.16311946	0.185671285	0.322755775	0.32280553	0.161022646	0.134963912	0.147265285	0.458133669	0.194703679	0.294983251	0.308751964	0.096981675	0.218104782	0.202169221	0.216878673	0.108118391	0.22273563	0.207618413	0.169246897	0.262278573	0.245782125	-1.905599111	high
TCGA-WE-AA9Y	1.01369863	0	0.351473963	0.394795964	0.440787854	0.716640144	0.382667509	0.213360402	0.186530808	0.459076809	0.315399065	0.408933295	0.421478862	0.221314738	0.453898922	0.369296099	0.261497904	0.237194985	0.398459417	0.352140713	0.285645237	0.305581602	0.410071738	-3.421406156	low
TCGA-WE-AAA0	2.917808219	0	0.149312826	0.281902091	0.434808571	0.566422673	0.688912853	0.150575866	0.281181977	0.381097552	0.315210179	0.406011297	0.424409262	0.153346808	0.366589618	0.327852995	0.349009444	0.312505335	0.372920208	0.317847732	0.309953112	0.328683202	0.389580547	-2.633656824	low
TCGA-WE-AAA3	1.643835616	0	0.237609907	0.209709326	0.521580377	0.468145831	0.260989132	0.2360775	0.278010957	0.355071895	0.271278545	0.36820957	0.436667297	0.142155214	0.320932816	0.234466076	0.255130291	0.182538701	0.430282724	0.237938091	0.180844661	0.257485527	0.254977724	-1.863642958	high
TCGA-XV-A9W2	1.142465753	0	0.252308261	0.124027352	0.556506452	0.717370062	0.254677561	0.066859005	0.241648862	0.690317846	0.169590335	0.387518295	0.251599799	0.14137057	0.302977741	0.151440628	0.222637226	0.135269171	0.32079286	0.274405603	0.215695052	0.211084924	0.308094988	-3.529679835	low
TCGA-XV-AAZV	1.128767123	0	0.198271961	0.179914715	0.407097458	0.636340659	0.317306139	0.181652599	0.798757128	0.5374311	0.324225656	0.38779959	0.593375899	0.139846252	0.406458094	0.361994411	0.264225765	0.210325541	0.305201889	0.284566544	0.367967563	0.301507433	0.352104475	-5.648850191	low
TCGA-XV-AAZW	1.076712329	1	0.132128731	0.209638132	0.502902142	0.562490919	0.234448632	0.063088473	0.150107009	0.17915709	0.095028331	0.156159224	0.109546525	0.056235677	0.25750058	0.183328965	0.313328196	0.076327721	0.116017751	0.101154481	0.075398051	0.138099982	0.11225269	-0.108077104	high
TCGA-XV-AAZY	1.109589041	0	0.173217962	0.333846019	0.604761304	0.531873386	0.272113522	0.555475248	0.525400649	0.429463984	0.347389505	0.374566575	0.485227141	0.157290466	0.52942688	0.313235462	0.371601424	0.271694921	0.438689047	0.416434832	0.420606949	0.300587278	0.347991492	-2.532454769	low
TCGA-YG-AA3N	0.838356164	0	0.242649595	0.580031627	0.458791795	0.531829825	0.470103036	0.322710352	0.543766833	0.444388263	0.272602884	0.355481108	0.512502555	0.239152032	0.403394401	0.381186605	0.345985201	0.343431017	0.393538407	0.369790995	0.408229872	0.388571609	0.458517077	-3.430825498	low
TCGA-YG-AA3P	1.202739726	0	0.564656255	0.076383867	0.541659752	0.128800716	0.304547184	0.340715579	0.105313919	0.423048799	0.074008414	0.209116222	0.907928145	0.035857009	0.088631291	0.057903932	0.104374059	0.045526059	0.218470778	0.306724607	0.017642254	0.07509627	0.303669407	-2.826111052	low
TCGA-Z2-A8RT	2.298630137	0	0.166622625	0.190329084	0.388787457	0.355534503	0.315706109	0.172166175	0.240130781	0.452955248	0.242366778	0.290656517	0.294332799	0.166562495	0.236394887	0.214672186	0.280973902	0.226789364	0.226619852	0.227360413	0.183510632	0.296084191	0.274886487	-1.675056665	high
TCGA-Z2-AA3S	8.082191781	0	0.11248302	0.178216437	0.278330276	0.290874026	0.114289121	0.911887686	0.151562054	0.408026983	0.135020344	0.318624805	0.230013603	0.110404256	0.15640453	0.226219514	0.161760263	0.100006181	0.210647343	0.108545481	0.170799722	0.226234761	0.184041854	-3.133086454	low
TCGA-Z2-AA3V	1.331506849	0	0.227491692	0.451811713	0.505391581	0.657626905	0.344877196	0.270087424	0.455822716	0.472718052	0.329994207	0.470582057	0.576355726	0.183253705	0.373301634	0.362431987	0.368140604	0.434324461	0.447149259	0.479650705	0.44014951	0.425059744	0.515347269	-3.288093431	low
