# Supplementary material for: Identification of Melanoma Subsets Based on DNA Methylation Sites and Construction of a Prognosis Evaluation Model
Source: J Oncol. 2022 Oct 11;2022:6608650. doi: 10.1155/2022/6608650 (PMC9578801; doi:10.1155/2022/6608650)
Supplement: Supplementary Materials — Supplementary Table 1. Prognosis-related methylation sites by univariate Cox regression analysis (783 sites were found, P < 0.0001). Supplementary Table 2. Multivariate Cox regression analysis of the 783 methylation sites (256 sites were found, P < 0.0001). Supplementary Table 3. Level of the 256 sites in 338 samples and the follow-up. Supplementary Table 4. Analysis of differences in methylation site levels between the 7 clusters. Supplementary Table 5. Risk assessment. Supplementary Table 6. Testing the prediction model in 60% of the samples (randomly) for 100 times. Supplementary Table 7. Functional enrichment analysis of genes and 28 pathways were observed. Supplementary Table 8. The correlation coefficients between the expression levels of the 35 hub genes (∗∗P < 0.01, ∗P < 0.05). Supplementary Table 9. The correlation coefficients of the critical genes validated in the testing group (∗∗P < 0.01). Figure S1. The clinical features in different DNA methylation subgroups. The clinical T categories (a), N stage (b), and M status (c) of different subtypes. The tumor stage (d), patient ages (e), and gender (f) in different subtypes. C, cluster; T, primary tumor; N, lymph node involvement; M, distant metastases. [file 6608650.f1.zip › Supplementary Table 8. The correlation coefficients between the expression levels of the 35 hub genes.txt]

Supplementary Table 8. The correlation coefficients between the expression levels of the 35 hub genes (** P<0.01, * P<0.05)
	survival time	ABCA1	AKT3	ARL9	BACE1	BTBD6	CDC25B	CEL	CPEB1	DOK2	EIF4G1	ELOVL6	FABP3	GBP4	GHRL	GPBAR1	HERC3	KRAS	LIPE	NCK2	NLRC5	PLEKHG5	PRDM2	PSMB8	PSMB9	PSMD8	PTK2	RAC3	RLN1	RNF123	SPSB1	SREBF1	TAP1	TNNT1	TP53	TSC2
survival time	1	0.032	.244**	-0.03	.235**	-0.09	-0.017	-.121*	-0.024	.123*	-0.034	.137*	-0.106	.208**	0.043	.142**	.189**	.108*	-0.064	0.035	.167**	0.033	0.085	.135*	.125*	-.153**	0.076	0.061	-0.021	.125*	0.09	.130*	0.076	0.014	0.032	0.065
ABCA1	0.032	1	0.009	0.07	.131*	-0.069	-0.088	-0.05	-0.063	.191**	-.139*	0.087	-0.049	.160**	0.052	.154**	.270**	.270**	-0.082	-0.104	.192**	.151**	0.104	0.04	.111*	-.128*	0.09	-0.102	.441**	-0.003	0.006	0.036	.131*	0.001	0.013	0.014
AKT3	.244**	0.009	1	-0.098	.167**	-.278**	-.177**	-0.061	.120*	-.176**	-0.074	.247**	-0.067	0.018	-.124*	-.144**	.240**	.298**	-.240**	.156**	-0.038	-.110*	.237**	0.007	-0.083	-.203**	.320**	-0.019	0.01	-0.037	-0.047	0.03	0.061	0.005	-0.073	-0.047
ARL9	-0.03	0.07	-0.098	1	0.099	-0.044	-0.046	-0.04	-0.091	-0.043	0.037	0.049	-0.015	0.002	-0.02	-0.014	-0.067	-0.061	0.019	-0.049	-0.017	0.023	-0.023	-0.024	-0.012	0.003	-0.005	-0.016	-0.007	0.076	0.018	-0.01	0.022	-0.001	-0.037	0.047
BACE1	.235**	.131*	.167**	0.099	1	-.160**	-0.064	-0.077	-.210**	-0.093	-0.094	.190**	-0.006	-0.044	-0.059	-0.083	.168**	.112*	-.138*	-0.027	-0.097	0.083	0.067	-0.106	-.115*	-.113*	.232**	0.078	-0.043	.125*	-0.036	0.045	-0.006	0.065	-0.013	0.039
BTBD6	-0.09	-0.069	-.278**	-0.044	-.160**	1	.128*	-0.077	0.052	-0.043	.195**	-0.087	.189**	-.112*	-0.094	0.009	-.110*	-.250**	.283**	0.031	-0.065	0.044	-.141**	-0.039	0.007	.154**	-.258**	-0.071	0.011	-0.027	-0.005	0.035	0.019	0.057	-0.035	-0.087
CDC25B	-0.017	-0.088	-.177**	-0.046	-0.064	.128*	1	-0.05	-0.007	-0.024	.173**	0.044	0.064	-0.076	0.007	-0.009	-.164**	-0.026	0.025	-0.004	-0.028	-0.003	-0.068	-0.093	-0.058	0.08	0.02	0.06	-0.039	-0.034	0.097	0.017	-0.023	.115*	0.026	-0.031
CEL	-.121*	-0.05	-0.061	-0.04	-0.077	-0.077	-0.05	1	-0.037	-0.037	0.013	-0.006	.161**	-.130*	0.025	-0.049	-.229**	-0.057	0.043	-0.01	-.120*	0.074	-.130*	-.144**	-.120*	-0.053	-0.001	0.035	-0.041	-0.08	-0.074	-0.004	-0.085	-0.023	0.051	-0.03
CPEB1	-0.024	-0.063	.120*	-0.091	-.210**	0.052	-0.007	-0.037	1	-.192**	.166**	-.135*	0.063	-.139*	-.161**	-.189**	-0.004	0.003	0.078	.126*	-.167**	-0.081	-0.078	-.145**	-.123*	.162**	0.039	-0.008	-0.068	0.038	-0.096	-0.015	0	0.036	0.03	0.081
DOK2	.123*	.191**	-.176**	-0.043	-0.093	-0.043	-0.024	-0.037	-.192**	1	-.135*	-.165**	-0.004	.563**	.459**	.742**	.158**	0.024	0.075	-.111*	.672**	0.029	.130*	.450**	.646**	-.163**	-.234**	-0.028	.119*	0.01	.122*	-0.015	-0.025	-0.013	0.07	-0.007
EIF4G1	-0.034	-.139*	-0.074	0.037	-0.094	.195**	.173**	0.013	.166**	-.135*	1	0.063	-0.01	-.185**	-.234**	-.116*	-.111*	-0.101	.194**	0	-.195**	0.095	-0.03	-.253**	-.196**	.274**	0.006	-0.057	-0.031	0.018	-0.029	-0.004	0.042	0.005	-0.078	0.039
ELOVL6	.137*	0.087	.247**	0.049	.190**	-0.087	0.044	-0.006	-.135*	-.165**	0.063	1	-0.085	-0.051	-.166**	-0.06	.171**	.279**	-0.095	-0.058	-0.056	.165**	0.042	-0.06	-.111*	-.157**	.235**	-0.03	0.02	-0.044	0.088	0.023	0.035	0.048	-.116*	-0.057
FABP3	-0.106	-0.049	-0.067	-0.015	-0.006	.189**	0.064	.161**	0.063	-0.004	-0.01	-0.085	1	-0.102	-0.076	-0.009	-0.078	0.004	0.016	0.018	-0.096	0.011	-0.061	-0.084	-0.08	.117*	0.058	-0.039	-0.017	0.026	0.005	-0.031	-0.03	.159**	0.101	0.01
GBP4	.208**	.160**	0.018	0.002	-0.044	-.112*	-0.076	-.130*	-.139*	.563**	-.185**	-0.051	-0.102	1	.188**	.548**	.259**	0.096	-0.084	-0.097	.676**	-0.09	.109*	.560**	.636**	-.231**	-0.089	-0.013	0.017	-0.039	0.052	-0.045	0.024	-0.021	0.057	-0.024
GHRL	0.043	0.052	-.124*	-0.02	-0.059	-0.094	0.007	0.025	-.161**	.459**	-.234**	-.166**	-0.076	.188**	1	.176**	.260**	0.063	.110*	-0.068	.528**	0.034	.311**	.219**	.301**	-.217**	-.161**	0.018	0.002	.107*	0.025	0.021	-0.064	-0.016	0.078	-0.033
GPBAR1	.142**	.154**	-.144**	-0.014	-0.083	0.009	-0.009	-0.049	-.189**	.742**	-.116*	-0.06	-0.009	.548**	.176**	1	0.069	-0.005	.144**	-0.099	.611**	0.018	0.02	.491**	.642**	-0.1	-.134*	-0.016	0.062	-0.013	0.087	-0.031	-0.009	-0.031	0.046	0.009
HERC3	.189**	.270**	.240**	-0.067	.168**	-.110*	-.164**	-.229**	-0.004	.158**	-.111*	.171**	-0.078	.259**	.260**	0.069	1	.333**	-0.051	-0.064	.334**	.136*	.444**	.186**	.153**	-.230**	0.076	-0.065	0.039	-0.002	0.003	0.094	0.071	0.003	.127*	-0.017
KRAS	.108*	.270**	.298**	-0.061	.112*	-.250**	-0.026	-0.057	0.003	0.024	-0.101	.279**	0.004	0.096	0.063	-0.005	.333**	1	-.175**	.146**	.109*	0.088	.253**	0.02	0.005	-.109*	.168**	0.042	0.105	0.034	0.029	-0.028	-0.02	0.073	0.022	-0.04
LIPE	-0.064	-0.082	-.240**	0.019	-.138*	.283**	0.025	0.043	0.078	0.075	.194**	-0.095	0.016	-0.084	.110*	.144**	-0.051	-.175**	1	-0.024	0.014	0.058	0.085	-0.081	-0.004	.202**	-.156**	-0.007	-0.015	0.026	-0.095	0.047	0.052	0.004	0.063	-0.026
NCK2	0.035	-0.104	.156**	-0.049	-0.027	0.031	-0.004	-0.01	.126*	-.111*	0	-0.058	0.018	-0.097	-0.068	-0.099	-0.064	.146**	-0.024	1	-.124*	-0.032	.167**	-.126*	-.131*	-0.044	0.099	0.04	-0.066	.112*	-0.067	0.064	0.044	-0.018	.128*	0.053
NLRC5	.167**	.192**	-0.038	-0.017	-0.097	-0.065	-0.028	-.120*	-.167**	.672**	-.195**	-0.056	-0.096	.676**	.528**	.611**	.334**	.109*	0.014	-.124*	1	-0.009	.225**	.725**	.787**	-.224**	-.197**	-0.027	0.041	0.031	0.035	-0.036	-0.027	-0.025	0.063	-0.031
PLEKHG5	0.033	.151**	-.110*	0.023	0.083	0.044	-0.003	0.074	-0.081	0.029	0.095	.165**	0.011	-0.09	0.034	0.018	.136*	0.088	0.058	-0.032	-0.009	1	0.037	-.146**	-0.085	-0.003	0.039	-0.021	0.004	-0.051	-0.065	0.002	.151**	-0.053	0.006	-0.064
PRDM2	0.085	0.104	.237**	-0.023	0.067	-.141**	-0.068	-.130*	-0.078	.130*	-0.03	0.042	-0.061	.109*	.311**	0.02	.444**	.253**	0.085	.167**	.225**	0.037	1	-0.031	0.005	-0.061	.163**	-0.079	-0.031	0.066	-0.023	0.013	0.059	0.048	0.086	-0.023
PSMB8	.135*	0.04	0.007	-0.024	-0.106	-0.039	-0.093	-.144**	-.145**	.450**	-.253**	-0.06	-0.084	.560**	.219**	.491**	.186**	0.02	-0.081	-.126*	.725**	-.146**	-0.031	1	.868**	-0.106	-.190**	0.017	0.039	-0.082	0.018	-0.05	-0.019	-0.057	0.01	-0.069
PSMB9	.125*	.111*	-0.083	-0.012	-.115*	0.007	-0.058	-.120*	-.123*	.646**	-.196**	-.111*	-0.08	.636**	.301**	.642**	.153**	0.005	-0.004	-.131*	.787**	-0.085	0.005	.868**	1	-0.105	-.255**	0.014	0.046	-0.035	0.067	-0.076	-0.047	-0.057	0.017	-0.043
PSMD8	-.153**	-.128*	-.203**	0.003	-.113*	.154**	0.08	-0.053	.162**	-.163**	.274**	-.157**	.117*	-.231**	-.217**	-0.1	-.230**	-.109*	.202**	-0.044	-.224**	-0.003	-0.061	-0.106	-0.105	1	-.211**	-0.009	-0.025	0.041	-0.035	-.108*	0.015	0.019	0.001	0.079
PTK2	0.076	0.09	.320**	-0.005	.232**	-.258**	0.02	-0.001	0.039	-.234**	0.006	.235**	0.058	-0.089	-.161**	-.134*	0.076	.168**	-.156**	0.099	-.197**	0.039	.163**	-.190**	-.255**	-.211**	1	0.045	-0.059	0.078	-0.02	0.104	0.04	-0.003	-0.009	0.02
RAC3	0.061	-0.102	-0.019	-0.016	0.078	-0.071	0.06	0.035	-0.008	-0.028	-0.057	-0.03	-0.039	-0.013	0.018	-0.016	-0.065	0.042	-0.007	0.04	-0.027	-0.021	-0.079	0.017	0.014	-0.009	0.045	1	-0.082	.225**	.181**	0.02	-.205**	0.08	0.064	.222**
RLN1	-0.021	.441**	0.01	-0.007	-0.043	0.011	-0.039	-0.041	-0.068	.119*	-0.031	0.02	-0.017	0.017	0.002	0.062	0.039	0.105	-0.015	-0.066	0.041	0.004	-0.031	0.039	0.046	-0.025	-0.059	-0.082	1	-0.061	0.027	-0.051	0.089	-0.004	-0.057	-.114*
RNF123	.125*	-0.003	-0.037	0.076	.125*	-0.027	-0.034	-0.08	0.038	0.01	0.018	-0.044	0.026	-0.039	.107*	-0.013	-0.002	0.034	0.026	.112*	0.031	-0.051	0.066	-0.082	-0.035	0.041	0.078	.225**	-0.061	1	0.087	.115*	-0.043	.156**	0.082	.401**
SPSB1	0.09	0.006	-0.047	0.018	-0.036	-0.005	0.097	-0.074	-0.096	.122*	-0.029	0.088	0.005	0.052	0.025	0.087	0.003	0.029	-0.095	-0.067	0.035	-0.065	-0.023	0.018	0.067	-0.035	-0.02	.181**	0.027	0.087	1	.108*	0.098	0.004	-.155**	0.045
SREBF1	.130*	0.036	0.03	-0.01	0.045	0.035	0.017	-0.004	-0.015	-0.015	-0.004	0.023	-0.031	-0.045	0.021	-0.031	0.094	-0.028	0.047	0.064	-0.036	0.002	0.013	-0.05	-0.076	-.108*	0.104	0.02	-0.051	.115*	.108*	1	.329**	-0.02	.120*	0.058
TAP1	0.076	.131*	0.061	0.022	-0.006	0.019	-0.023	-0.085	0	-0.025	0.042	0.035	-0.03	0.024	-0.064	-0.009	0.071	-0.02	0.052	0.044	-0.027	.151**	0.059	-0.019	-0.047	0.015	0.04	-.205**	0.089	-0.043	0.098	.329**	1	-0.073	-0.08	-0.087
TNNT1	0.014	0.001	0.005	-0.001	0.065	0.057	.115*	-0.023	0.036	-0.013	0.005	0.048	.159**	-0.021	-0.016	-0.031	0.003	0.073	0.004	-0.018	-0.025	-0.053	0.048	-0.057	-0.057	0.019	-0.003	0.08	-0.004	.156**	0.004	-0.02	-0.073	1	-0.027	0.018
TP53	0.032	0.013	-0.073	-0.037	-0.013	-0.035	0.026	0.051	0.03	0.07	-0.078	-.116*	0.101	0.057	0.078	0.046	.127*	0.022	0.063	.128*	0.063	0.006	0.086	0.01	0.017	0.001	-0.009	0.064	-0.057	0.082	-.155**	.120*	-0.08	-0.027	1	.255**
TSC2	0.065	0.014	-0.047	0.047	0.039	-0.087	-0.031	-0.03	0.081	-0.007	0.039	-0.057	0.01	-0.024	-0.033	0.009	-0.017	-0.04	-0.026	0.053	-0.031	-0.064	-0.023	-0.069	-0.043	0.079	0.02	.222**	-.114*	.401**	0.045	0.058	-0.087	0.018	.255**	1
